# Supplementary material
Source: PubMed Central journal article supplement (PMC6792158)
Supplement: ml9b00225_si_001.pdf [file ml9b00225_si_001.pdf]

**Supporting information for**  
**3-Amino-Chromanes and Tetrahydroquinolines as Selective 5-HT<sub>2B</sub>, 5-HT<sub>7</sub>, or**  
**σ<sub>1</sub> Receptor Ligands**

Matthew R. Porter<sup>1</sup>, Haiyan Xiao<sup>2,3</sup>, Jing Wang<sup>2,3</sup>, Sylvia B. Smith<sup>2,3,4</sup>, Joseph J. Topczewski<sup>1\*</sup>

<sup>1</sup>Department of Chemistry, University of Minnesota Twin Cities, Minneapolis, MN, 55455, United States

<sup>2</sup>Department of Cellular Biology and Anatomy, Medical College of Georgia at Augusta University, Augusta, GA, 30912, United States

<sup>3</sup>James and Jean Culver Vision Discovery Institute, Augusta University, Augusta, GA, 30912, United States

<sup>4</sup>Department of Ophthalmology, Medical College of Georgia at Augusta University, Augusta, GA, 30912, United States

**Table of Contents**

|                                                      |            |
|------------------------------------------------------|------------|
| <b>General Chemical Synthesis Information</b>        | <b>S2</b>  |
| <b>General Cellular Assay Information</b>            | <b>S2</b>  |
| <b>Substrate Synthesis and Characterization Data</b> | <b>S4</b>  |
| <b>References Not in Text</b>                        | <b>S28</b> |
| <b><i>K<sub>i</sub></i> Data</b>                     | <b>S29</b> |
| <b>Additional Cellular Assays</b>                    | <b>S52</b> |
| <b>Spectral Data</b>                                 | <b>S54</b> |

### **General Chemical Synthesis Information:**

**Azide Precautions:** Organic and inorganic azides are known to be high-energy materials and explosions have been reported with their use.<sup>1</sup> All of the azides reported herein were synthesized without incident; however, several precautions were taken. First, all azides synthesized herein have a C/N ratio of  $\geq 3:1$ . Second, reactions with more than 1 mmol of azide were placed behind safety shields both in the fume hood and during rotary evaporation. Third, all waste solutions (both organic and aqueous) that could be contaminated by azide were kept segregated in specially labeled containers and were kept STRICTLY free of acid to prevent incidental formation of  $\text{HN}_3$ .

**General Chemical Synthesis:** All reactions sensitive to air or moisture were carried out in oven-dried glassware using standard Schlenk line techniques or were conducted using a glovebox (details are provided below). All reactions were mixed by magnetic stirring (100-600 rpm). All reactions conducted at elevated temperatures used aluminum block heating with an external thermocouple. Dry DCM and THF were obtained from a commercial solvent purification system using activated alumina columns and stored under a positive pressure of argon. Other reagents and solvents were purchased from commercial suppliers and were used as received. Reactions were monitored by gas chromatography or thin layer chromatography (TLC) using pre-coated plastic plates impregnated with a fluorescent indicator (254 nm). Visualization was carried out with UV light (254 nm),  $\text{KMnO}_4$ , ninhydrin, or PMA stains. Column chromatography was performed using a Teledyne Isco CombiFlash  $R_f$  purification system utilizing normal phase pre-column load cartridges and gold high performance columns.

**Instrumentation for Chemical Synthesis:** All proton ( $^1\text{H}$ ) NMR spectra were recorded at 400 or 500 MHz on a Bruker spectrometer. All carbon ( $^{13}\text{C}$ ) NMR spectra were recorded at either 101 or 126 MHz on a Bruker spectrometer. Chemical shifts are expressed in ppm and are referenced to residual solvent as an internal standard ( $^1\text{H}$ :  $\text{CHCl}_3$ , 7.27 ppm,  $^{13}\text{C}$   $\text{CDCl}_3$ , 77.2 ppm). Infrared (IR) spectra were performed as a film on NaCl plates on a Nexus 670 FT-IR and are reported in  $\text{cm}^{-1}$ .

**Note:** Compounds are identified via a “number-letter” format (eg compound **4d**). For organizational convenience, compounds derived from the same starting material have the same letter designation (e.g. all compounds derived from 4-phenylphenol are denoted “#f”). Precursor compounds **1**, **2**, and **5-9** of substrate families **a-c**, **e**, **j-l**, **n**, and **o** were synthesized in a previous publication. Synthetic methods and characterization data for those compounds can be found in that paper.<sup>2</sup>

### **General Cellular Assay Information:**

**Biological Activity Assay:** Compounds were assayed for biological activity at the Psychoactive Drug Screen Program via a two tiered system: an initial screen against receptors at 10  $\mu\text{M}$  concentration, followed by a secondary assay to determine  $K_i$  values for compounds that exhibited over 50% activity in the primary assay.<sup>3</sup> Compounds were shipped to the PDSP as neat oils or solids.

**Compound Preparation for Cellular Assays:** **4j** was prepared in 20% DMSO in 0.01 M phosphate buffered saline (PBS) and 18% 1M HCl; (+)-pentazocine (PTZ) (sourced from Sigma-Aldrich) was prepared in 10% DMSO in 0.01 M PBS and 6% 1M HCl; tert-butyl hydroperoxide (tBHP) [5.5 M in decane] (sourced from Sigma-Aldrich) was dissolved in 0.01 M PBS.

**Cell Culture and Cell Viability:** 661W cells, obtained from Dr. M. Al-Ubaidi (Univ. of Houston), express blue and green cone pigments, transducin and cone arrestin characteristic of

cone photoreceptor cells.<sup>4</sup> They were cultured in Dulbecco's modified Eagle's medium (DMEM, Thermo Fisher Scientific, Waltham, MA) supplemented with 5% FBS for regular culture or 1% FBS for treatment, and 100U/mL penicillin, 100µg/mL streptomycin. The cells were treated with tBHP [55 µM] to induce oxidative stress<sup>5,6</sup> in the presence/absence of compound **4j** or (+)-PTZ for 24 h. Cell viability under these various conditions was measured using the Vybrant® MTT Cell Proliferation Assay Kit as described previously.<sup>7</sup> Cells were solubilized in isopropanol and released, solubilized formazan reagent was measured spectrophotometrically using a Synergy H1 Hybrid Multi-Mode plate reader (Winooski, VT) at 540 nm. The assay was performed in triplicate. Cells cultured under identical conditions, but with no treatment served as control.

**Assessment of oxidative stress:** To assess effects of **4j** on oxidative stress *in vitro*, 661W cells were seeded on coverslips and were exposed to media containing tBHP (55 µM) for 2 h. In companion studies, cells were treated with **4j** (10, 30 µM) or (+)-PTZ (20, 50 µM) and tBHP (55µM) for 2 h or were treated with **4j** or (+)-PTZ alone. Control experiments were conducted in parallel in which tBHP and (+)-PTZ were omitted from the media. Following treatments, cells were rinsed with PBS and intracellular reactive oxygen species (ROS) were detected in cells using 5 µM CellROX Green Reagent (Thermo-Fisher Scientific; 30 min incubation, followed by fixation). The assay detects reactive oxygen species (ROS) including hydroxyl, peroxy, peroxynitrite and hydroxyl radicals. DAPI was used to stain nuclei. Green fluorescent signals representing ROS were visualized using an Axioplan-2 fluorescent microscope Carl Zeiss, Göttingen, Germany) equipped with an HRM camera. Fluorescence intensity was quantified using NIH Image J 1.48v software.

**Statistical Analysis:** The data were analyzed using GraphPad Prism statistical analysis program (LaJolla, Calif., USA). Significance was established as  $p < 0.05$ . Data were analyzed by one-way ANOVA followed by Tukey's post-hoc test.

## General Sequence for Substrate Synthesis

X = CH<sub>2</sub>, O, or NAr

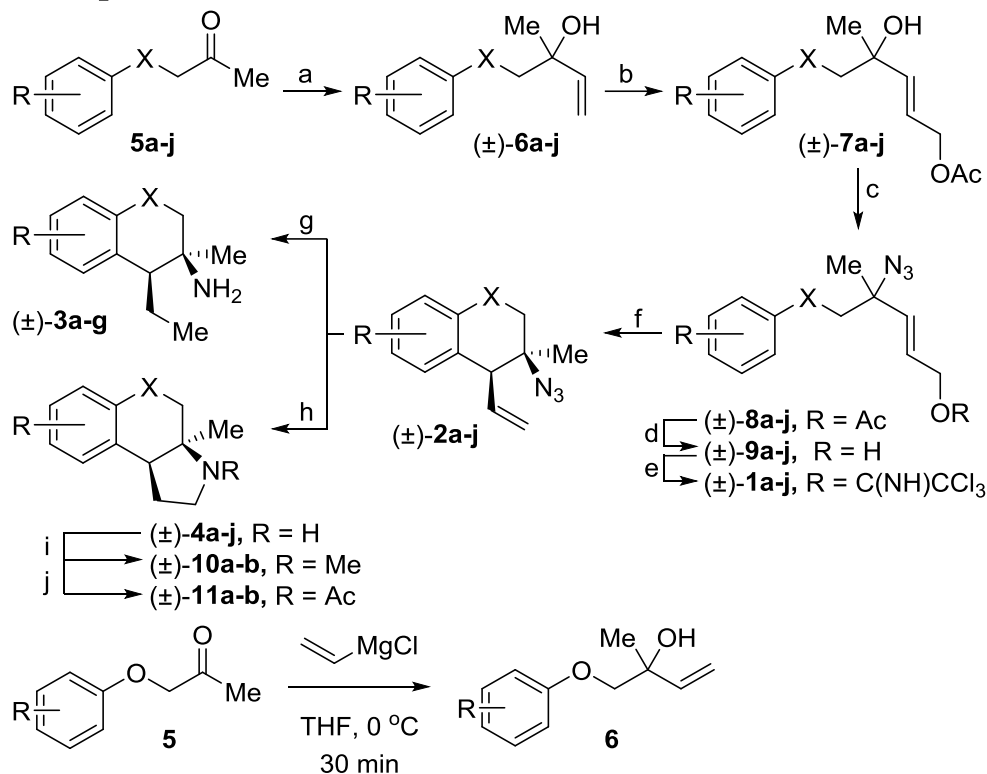

**General Procedure 1: Addition of vinyl magnesium Grignard:** Example given for R = *m*-OBn. **Compound ( $\pm$ )-6d.** An oven-dried round bottom flask was sequentially charged with THF (20 mL) and a solution of vinyl magnesium chloride (4.0 mL, 1.6 M in THF, 6.6 mmol), then cooled in an ice bath. To this solution neat **5d** (R = *m*-OBn, 1.3 g, 5.1 mmol) was added dropwise over 5 min. After 30 min, the reaction was quenched into a saturated solution of NH<sub>4</sub>Cl (20 mL). The resulting solution was extracted with EtOAc (3 x 15 mL). The combined organic layers were washed with brine, dried (MgSO<sub>4</sub>), and concentrated *in vacuo* to afford alcohol **5d** (1.2 g, 4.2 mmol, 83%) as a slightly yellow oil. **Note:** Substrates **6a-c**, **6e**, **6j-l**, and **6n-o** were synthesized according to a previous publication. Characterization data for those compounds can be found in that paper.<sup>2</sup>

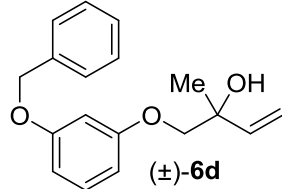

<sup>1</sup>H NMR (500 MHz, CDCl<sub>3</sub>)  $\delta$  7.45 (d, *J* = 7.0 Hz, 2H), 7.44 – 7.39 (m, 2H), 7.37 – 7.33 (m, 1H), 7.20 (t, *J* = 8.2 Hz, 1H), 6.63 (dd, *J* = 8.0, 2.4 Hz, 1H), 6.60 (t, *J* = 2.3 Hz, 1H), 6.56 (dd, *J* = 8.0, 2.4 Hz, 1H), 6.04 (dd, *J* = 17.4, 10.8 Hz, 1H), 5.42 (dd, *J* = 17.4, 1.2 Hz, 1H), 5.22 (dd, *J* = 10.8, 1.2 Hz, 1H), 5.06 (s, 2H), 3.89 (d, *J* = 8.9 Hz, 1H), 3.84 (d, *J* = 8.9 Hz, 1H), 2.43 (br s, 1H), 1.42 (s, 3H); <sup>13</sup>C NMR (126 MHz, CDCl<sub>3</sub>)  $\delta$  160.2, 160.1, 141.9, 137.1, 130.1, 128.8, 128.1, 127.7, 114.2, 107.8, 107.4, 102.3, 75.1, 72.6, 70.2, 24.6; IR (NaCl, thin film, cm<sup>-1</sup>) 3440, 2979, 2930, 2870, 1593, 1491, 1454, 1288, 1262, 1178, 1151, 1045, 1027, 758, 737, 696; HRMS (ESI-TOF) *m/z* calcd for C<sub>18</sub>H<sub>20</sub>O<sub>3</sub>Na<sup>+</sup> (M+Na)<sup>+</sup> 307.1305, found 307.1304.



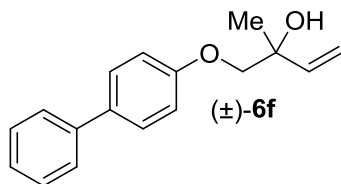

(±)-6f: General procedure 1 was used and the product was isolated in 83% yield (1.9 g) as a white solid:  $^1\text{H NMR}$  (500 MHz,  $\text{CDCl}_3$ )  $\delta$  7.60 – 7.54 (m, 4H), 7.45 (t,  $J = 7.7$  Hz, 2H), 7.34 (tt,  $J = 7.3, 1.3$  Hz, 1H), 7.05 – 6.99 (m, 2H), 6.08 (dd,  $J = 17.4, 10.8$  Hz, 1H), 5.46 (dd,  $J = 17.4, 1.2$  Hz, 1H), 5.25 (dd,  $J = 10.8, 1.2$  Hz, 1H), 3.96 (d,  $J = 8.9$  Hz, 1H), 3.92 (d,  $J = 8.9$  Hz, 1H), 2.47 (br s, 1H), 1.46 (s, 3H);  $^{13}\text{C NMR}$  (126 MHz,  $\text{CDCl}_3$ )  $\delta$  158.4, 141.9, 140.8, 134.5, 128.9, 128.3, 126.9 (2C), 115.2, 114.2, 75.2, 72.6, 24.7; **IR** (NaCl, thin film,  $\text{cm}^{-1}$ ) 3349, 3032, 2977, 2920, 2868, 1606, 1519, 1487, 1269, 1246, 1050, 924, 904, 831, 760, 736, 690; **HRMS** (ESI-TOF)  $m/z$  calcd for  $\text{C}_{17}\text{H}_{18}\text{O}_2\text{Na}^+$  ( $\text{M}+\text{Na}$ ) $^+$  277.1199, found 277.1194.

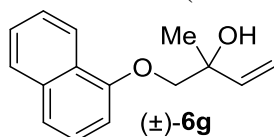

(±)-6g: General procedure 1 was used and the product was isolated in 89% yield (2.0 g) as a yellow oil:  $^1\text{H NMR}$  (500 MHz,  $\text{CDCl}_3$ )  $\delta$  8.28 – 8.23 (m, 1H), 7.85 – 7.81 (m, 1H), 7.54 – 7.48 (m, 2H), 7.47 (d,  $J = 8.2$  Hz, 1H), 7.39 (t,  $J = 7.9$  Hz, 1H), 6.83 (dd,  $J = 7.6, 1.0$  Hz, 1H), 6.15 (dd,  $J = 17.3, 10.8$  Hz, 1H), 5.52 (dd,  $J = 17.3, 1.2$  Hz, 1H), 5.28 (dd,  $J = 10.8, 1.2$  Hz, 1H), 4.08 (d,  $J = 8.8$  Hz, 1H), 4.06 (d,  $J = 8.9$  Hz, 1H), 2.50 (br s, 1H), 1.54 (s, 3H);  $^{13}\text{C NMR}$  (126 MHz,  $\text{CDCl}_3$ )  $\delta$  154.4, 142.1, 134.7, 127.8, 126.7, 126.0, 125.7, 125.5, 121.9, 121.0, 114.3, 105.2, 75.2, 72.9, 24.9; **IR** (NaCl, thin film,  $\text{cm}^{-1}$ ) 3428, 3053, 2980, 2929, 2870, 1595, 1579, 1508, 1459, 1402, 1270, 1241, 1102, 1069, 1020, 790, 770; **HRMS** (ESI-TOF)  $m/z$  calcd for  $\text{C}_{15}\text{H}_{16}\text{O}_2\text{Na}^+$  ( $\text{M}+\text{Na}$ ) $^+$  251.1043, found 251.1037.

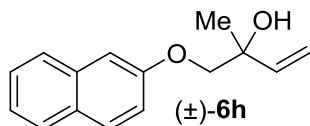

(±)-6h: General procedure 1 was used and the product was isolated in 91% yield (2.1 g) as a tan solid.  $^1\text{H NMR}$  (500 MHz,  $\text{CDCl}_3$ )  $\delta$  7.79 (dd,  $J = 8.2, 1.2$  Hz, 1H), 7.77 (d,  $J = 8.9$  Hz, 1H), 7.75 (dd,  $J = 8.2, 1.1$  Hz, 1H), 7.47 (ddd,  $J = 8.2, 6.9, 1.3$  Hz, 1H), 7.37 (ddd,  $J = 8.1, 6.8, 1.2$  Hz, 1H), 7.20 (dd,  $J = 8.9, 2.6$  Hz, 1H), 7.17 (d,  $J = 2.6$  Hz, 1H), 6.10 (dd,  $J = 17.3, 10.8$  Hz, 1H), 5.47 (dd,  $J = 17.4, 1.2$  Hz, 1H), 5.26 (dd,  $J = 10.8, 1.2$  Hz, 1H), 4.03 (d,  $J = 8.9$  Hz, 1H), 3.99 (d,  $J = 8.9$  Hz, 1H), 2.54 (br s, 1H), 1.48 (s, 3H);  $^{13}\text{C NMR}$  (126 MHz,  $\text{CDCl}_3$ )  $\delta$  156.7, 141.9, 134.6, 129.6, 129.3, 127.8, 126.9, 126.6, 124.0, 118.9, 114.3, 107.2, 75.0, 72.6, 24.7; **IR** (NaCl, thin film,  $\text{cm}^{-1}$ ) 3431, 3057, 2979, 2930, 1629, 1600, 1511, 1459, 1389, 1257, 1218, 1177, 1120, 1040, 960, 837, 746; **HRMS** (ESI-TOF)  $m/z$  calcd for  $\text{C}_{15}\text{H}_{16}\text{O}_2\text{Na}^+$  ( $\text{M}+\text{Na}$ ) $^+$  251.1043, found 251.1053.

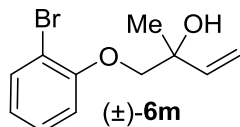

(±)-6m: General procedure 1 was used and the product was isolated in 90% yield (2.0 g) as a yellow oil:  $^1\text{H NMR}$  (500 MHz,  $\text{CDCl}_3$ )  $\delta$  7.54 (dd,  $J = 7.9, 1.7$  Hz, 1H), 7.26 (ddd,  $J = 8.2, 7.4, 1.6$  Hz, 1H), 6.88 (dd,  $J = 8.3, 1.4$  Hz, 1H), 6.86 (td,  $J = 7.6, 1.4$  Hz, 1H), 6.06 (dd,  $J = 17.4, 10.8$  Hz, 1H), 5.44 (dd,  $J = 17.4, 1.2$  Hz, 1H), 5.23 (dd,  $J = 10.8, 1.2$  Hz, 1H), 3.94 (d,  $J = 8.6$  Hz, 1H),

3.88 (d,  $J = 8.7$  Hz, 1H), 2.68 (br s, 1H), 1.46 (s, 3H);  $^{13}\text{C NMR}$  (126 MHz,  $\text{CDCl}_3$ )  $\delta$  155.0, 141.5, 133.4, 128.7, 122.6, 114.4, 113.9, 112.7, 76.3, 72.6, 24.6; **IR** (NaCl, thin film,  $\text{cm}^{-1}$ ) 3428, 3064, 2977, 2931, 2872, 1585, 1481, 1442, 1292, 1279, 1248, 1054, 1031, 924, 746; **HRMS** (ESI-TOF)  $m/z$  calcd for  $\text{C}_{11}\text{H}_{13}\text{BrO}_2\text{Na}^+$  ( $\text{M}+\text{Na}$ ) $^+$  278.9991, found 278.9989.

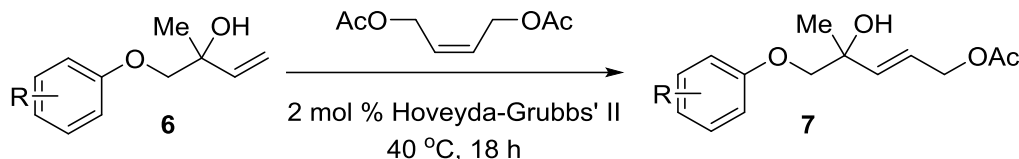

**General Procedure 2: Formation of cross metathesis product:** Example for  $\text{R} = m\text{-OBn}$ .

**Compound ( $\pm$ )-7d:** In a glovebox, a 20 mL vial was charged with Hoveyda-Grubbs' 2<sup>nd</sup> generation catalyst (48 mg, 78  $\mu\text{mol}$ , 2 mol %). The vial was sealed and removed from the glovebox. The vial was uncapped and compound **6d** (1.2 g, 3.9 mmol) and *cis*-1,4-diacetoxy-2-butene (2.0 mL, 12 mmol) were added as a neat mixture. The vial was attached to a vacuum adapter, placed under reduced pressure ( $< 1.0$  torr), and heated to 40  $^\circ\text{C}$ . After 18 h, the vacuum was released and the resulting mixture was loaded directly onto a column load cartridge. Final purification by column chromatography (0 to 80% gradient, EtOAc in hexanes) afforded compound **7d** (1.1 g, 2.9 mmol, 76%) as a yellow oil. **Note:** Substrates **7a-c**, **7e**, **7j-l**, and **7n-o** were synthesized according to a previous publication. Characterization data for those compounds can be found in that paper.<sup>2</sup>

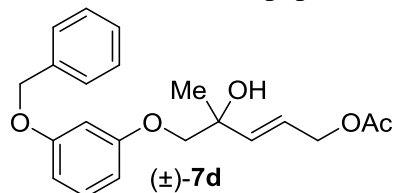

$^1\text{H NMR}$  (500 MHz,  $\text{CDCl}_3$ )  $\delta$  7.47 – 7.43 (m, 2H), 7.42 – 7.38 (m, 2H), 7.34 (tt,  $J = 7.0, 2.3$  Hz, 1H), 7.20 (t,  $J = 8.2$  Hz, 1H), 6.62 (ddd,  $J = 8.1, 2.4, 0.8$  Hz, 1H), 6.59 (t,  $J = 2.4$  Hz, 1H), 6.54 (ddd,  $J = 8.3, 2.4, 0.8$  Hz, 1H), 6.00 – 5.89 (m, 2H), 5.06 (s, 2H), 4.62 (d,  $J = 4.9$  Hz, 2H), 3.87 (d,  $J = 8.9$  Hz, 1H), 3.83 (d,  $J = 9.0$  Hz, 1H), 2.56 (br s, 1H), 2.09 (s, 3H), 1.42 (s, 3H);  $^{13}\text{C NMR}$  (126 MHz,  $\text{CDCl}_3$ )  $\delta$  170.9, 160.2, 159.9, 137.7, 137.0, 130.1, 128.7, 128.1, 127.6, 124.0, 107.7, 107.4, 102.3, 75.0, 72.0, 70.2, 64.5, 24.8, 21.1; **IR** (NaCl, thin film,  $\text{cm}^{-1}$ ) 3467, 3031, 2975, 2932, 2872, 1736, 1593, 1491, 1454, 1380, 1260, 1179, 1150, 1027, 970, 763, 741, 697; **HRMS** (ESI-TOF)  $m/z$  calcd for  $\text{C}_{21}\text{H}_{24}\text{O}_5\text{Na}^+$  ( $\text{M}+\text{Na}$ ) $^+$  379.1516, found 379.1520.

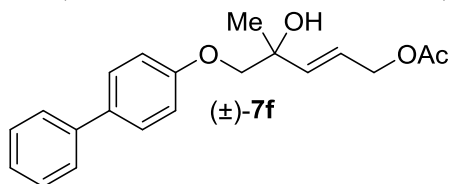

**( $\pm$ )-7f:** General procedure 2 was used and the product was isolated in 81% (1.1 g) as a white solid.  $^1\text{H NMR}$  (500 MHz,  $\text{CDCl}_3$ )  $\delta$  7.59 – 7.51 (m, 4H), 7.43 (dd,  $J = 8.5, 7.0$  Hz, 2H), 7.33 (tt,  $J = 7.3, 1.3$  Hz, 1H), 7.02 – 6.98 (m, 2H), 6.02 – 5.92 (m, 2H), 4.64 (d,  $J = 4.6$  Hz, 2H), 3.94 (d,  $J = 8.9$  Hz, 1H), 3.90 (d,  $J = 8.9$  Hz, 1H), 2.60 (br s, 1H), 2.10 (s, 3H), 1.46 (s, 3H);  $^{13}\text{C NMR}$  (126 MHz,  $\text{CDCl}_3$ )  $\delta$  170.9, 158.2, 140.8, 137.7, 134.5, 128.9, 128.3, 126.93, 126.88, 124.1, 115.1, 75.1, 72.1, 64.5, 24.8, 21.1; **IR** (NaCl, thin film,  $\text{cm}^{-1}$ ) 3471, 3032, 2976, 2930, 2871, 1738, 1607, 1488, 1379, 1353, 1245, 1050, 1031, 973, 831, 761, 695; **HRMS** (ESI-TOF)  $m/z$  calcd for  $\text{C}_{20}\text{H}_{22}\text{O}_4\text{Na}^+$  ( $\text{M}+\text{Na}$ ) $^+$  349.1410, found 349.1418.

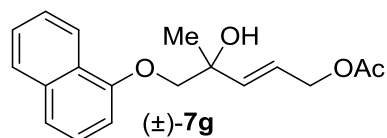

(±)-7g: General procedure 2 was used and the product was isolated in 86% yield (1.3 g) as a yellow oil.  $^1\text{H NMR}$  (500 MHz,  $\text{CDCl}_3$ )  $\delta$  8.25 – 8.21 (m, 1H), 7.84 – 7.81 (m, 1H), 7.54 – 7.48 (m, 2H), 7.47 (d,  $J = 8.0$  Hz, 1H), 7.38 (t,  $J = 7.9$  Hz, 1H), 6.82 (d,  $J = 7.6$  Hz, 1H), 6.08 – 6.03 (m, 2H), 4.69 – 4.59 (m, 2H), 4.06 (s, 2H), 2.58 (br s, 1H), 2.09 (s, 3H), 1.54 (s, 3H);  $^{13}\text{C NMR}$  (126 MHz,  $\text{CDCl}_3$ )  $\delta$  170.9, 154.2, 138.0, 134.7, 127.8, 126.7, 126.0, 125.7, 125.5, 124.1, 121.8, 121.0, 105.3, 75.1, 72.3, 64.5, 25.0, 21.1; **IR** (NaCl, thin film,  $\text{cm}^{-1}$ ) 3457, 3053, 2976, 2931, 1736, 1580, 1401, 1268, 1241, 1102, 1069, 1021, 970, 792, 772; **HRMS** (ESI-TOF)  $m/z$  calcd for  $\text{C}_{18}\text{H}_{20}\text{O}_4\text{Na}^+$  ( $\text{M}+\text{Na}$ ) $^+$  323.1254, found 323.1257.

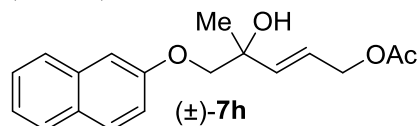

(±)-7h: General procedure 2 was used and the product was isolated in 72% yield (1.1 g) as a yellow oil.  $^1\text{H NMR}$  (500 MHz,  $\text{CDCl}_3$ )  $\delta$  7.78 (d,  $J = 7.8$  Hz, 1H), 7.76 (d,  $J = 9.1$  Hz, 1H), 7.73 (d,  $J = 8.2$  Hz, 1H), 7.46 (ddd,  $J = 8.2, 6.7, 1.3$  Hz, 1H), 7.36 (ddd,  $J = 8.1, 6.8, 1.2$  Hz, 1H), 7.18 (dd,  $J = 8.9, 2.5$  Hz, 1H), 7.15 (d,  $J = 2.6$  Hz, 1H), 6.02 – 5.96 (m, 2H), 4.64 (d,  $J = 4.2$  Hz, 2H), 4.01 (d,  $J = 8.9$  Hz, 1H), 3.98 (d,  $J = 8.9$  Hz, 1H), 2.59 (br s, 1H), 2.10 (s, 3H), 1.48 (s, 3H);  $^{13}\text{C NMR}$  (126 MHz,  $\text{CDCl}_3$ )  $\delta$  170.9, 156.6, 137.7, 134.6, 129.7, 129.3, 127.8, 126.9, 126.7, 124.1, 124.0, 118.8, 107.2, 74.9, 72.1, 64.5, 24.9, 21.1; **IR** (NaCl, thin film,  $\text{cm}^{-1}$ ) 3456, 3057, 2976, 2933, 2872, 1736, 1629, 1600, 1511, 1460, 1389, 1360, 1257, 1218, 1178, 1120, 1032, 963, 838, 748; **HRMS** (ESI-TOF)  $m/z$  calcd for  $\text{C}_{18}\text{H}_{20}\text{O}_4\text{Na}^+$  ( $\text{M}+\text{Na}$ ) $^+$  323.1254, found 323.1257.

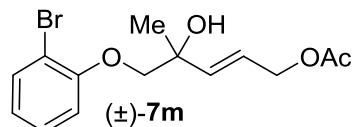

(±)-7m: General procedure 2 was used and the product was isolated in 68% yield (890 mg) as a yellow oil:  $^1\text{H NMR}$  (500 MHz,  $\text{CDCl}_3$ )  $\delta$  7.54 (dd,  $J = 8.1, 1.5$  Hz, 1H), 7.27 – 7.23 (m, 1H), 6.89 – 6.84 (m, 2H), 6.01 – 5.91 (m, 2H), 4.62 – 4.59 (m, 2H), 3.93 (d,  $J = 8.7$  Hz, 1H), 3.89 (d,  $J = 8.7$  Hz, 1H), 2.69 (br s, 1H), 2.08 (s, 3H), 1.46 (s, 3H);  $^{13}\text{C NMR}$  (126 MHz,  $\text{CDCl}_3$ )  $\delta$  170.9, 154.9, 137.3, 133.4, 128.7, 124.2, 122.7, 113.9, 112.7, 76.2, 72.1, 64.5, 24.8, 21.1; **IR** (NaCl, thin film,  $\text{cm}^{-1}$ ) 3462, 3064, 2976, 2935, 2875, 1737, 1585, 1482, 1443, 1278, 1247, 1054, 1030, 972, 749; **HRMS** (ESI-TOF)  $m/z$  calcd for  $\text{C}_{14}\text{H}_{17}\text{BrO}_4\text{Na}^+$  ( $\text{M}+\text{Na}$ ) $^+$  351.0202, found 351.0202.

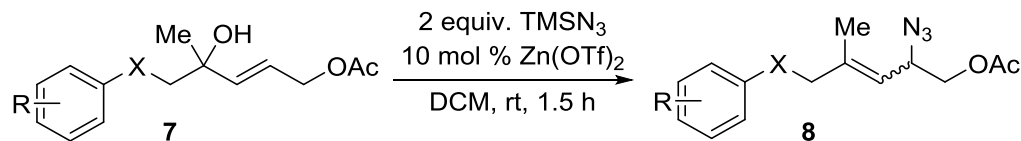

**General Procedure 3: Azide Installation with TMSN<sub>3</sub>:** Example given for R = *m*-OBn.

**Compound (±)-8d:** To a solution of alcohol **7d** (980 mg, 2.8 mmol) in DCM (0.8 mL) at room temperature, trimethylsilyl azide (0.70 mL, 5.5 mmol), and  $\text{Zn(OTf)}_2$  (110 mg, 0.28 mmol, 10 mol %) were sequentially added. The vial was sealed. After 1.5 h, the solution was quenched by addition of trimethylamine (0.1 mL, 0.7 mmol) and methanol (1 mL), and stirred for 5 min. The resulting solution was filtered through a plug of basic alumina and the filtrate was concentrated *in vacuo*. Final purification by column chromatography (0 to 80% gradient, EtOAc in hexanes)

afforded azide **8d** (590 mg, 1.5 mmol, 56%) as a yellow oil. **Note:** Substrates **8a-c**, **8e**, **8j-l**, and **8n-o** were synthesized according to a previous publication. Characterization data for those compounds can be found in that paper.<sup>2</sup>

Compound **8d** was isolated as a mixture of three isomers (1.0:1.6:0.2 *trans*:*E*:*Z*). NMR data given below is based off of idealized integrations of the resulting mixture:

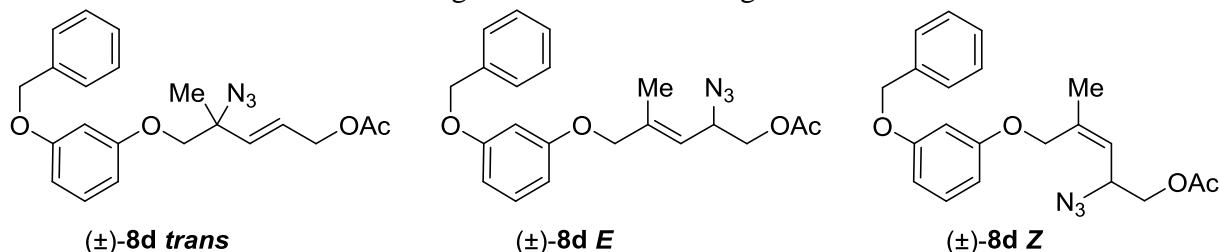

**<sup>1</sup>H NMR** (500 MHz, CDCl<sub>3</sub>) **8d trans** δ 7.48 – 7.38 (m, 4H), 7.37 – 7.32 (m, 1H), 7.23 – 7.17 (m, 1H), 6.65 – 6.53 (m, 3H), 5.97 (dt, *J* = 15.7, 5.6 Hz, 1H), 5.87 (dt, *J* = 15.8, 1.3 Hz, 1H), 5.06 (s, 2H), 4.64 (dd, *J* = 5.7, 1.4 Hz, 2H), 3.92 (d, *J* = 9.3 Hz, 1H), 3.90 (d, *J* = 9.3 Hz, 1H), 2.11 (s, 3H), 1.54 (s, 3H); **8d E** δ 7.48 – 7.38 (m, 4H), 7.37 – 7.32 (m, 1H), 7.23 – 7.17 (m, 1H), 6.65 – 6.53 (m, 3H), 5.54 (dq, *J* = 9.1, 1.5 Hz, 1H), 5.06 (s, 2H), 4.56 – 4.50 (m, 1H), 4.46 (s, 2H), 4.15 (dd, *J* = 11.4, 4.4 Hz, 1H), 4.04 (dd, *J* = 11.4, 7.8 Hz, 1H), 2.11 (s, 3H), 1.87 (d, *J* = 1.5 Hz, 3H); **8d Z** δ 7.48 – 7.38 (m, 4H), 7.37 – 7.32 (m, 1H), 7.23 – 7.17 (m, 1H), 6.65 – 6.53 (m, 3H), 5.39 (dq, *J* = 9.5, 1.4 Hz, 1H), 5.07 (s, 2H), 4.60 (ddd, *J* = 9.5, 7.5, 4.5 Hz, 1H), 4.56 – 4.50 (m, 2H), 4.13 (dd, *J* = 11.4, 4.5 Hz, 1H), 4.04 (dd, *J* = 11.4, 7.6 Hz, 1H), 2.10 (s, 3H), 1.96 (d, *J* = 1.6 Hz, 3H); **<sup>13</sup>C NMR** (126 MHz, CDCl<sub>3</sub>) δ 170.75, 170.72, 160.2, 159.77, 159.73, 139.4, 139.13, 137.07, 137.01, 133.2, 130.16, 130.13, 130.08, 128.7, 128.12, 128.10, 127.6, 126.60, 122.56, 120.2, 107.9, 107.8, 107.7, 107.5, 107.3, 102.39, 102.35, 102.30, 74.2, 72.2, 70.20, 70.17, 67.1, 66.0, 65.7, 64.1, 63.2, 57.7, 57.6, 22.0, 21.3, 21.0, 20.9, 14.6; **IR** (NaCl, thin film, cm<sup>-1</sup>) 3064, 3032, 2934, 2872, 2108, 1743, 1592, 1491, 1454, 1381, 1228, 1177, 1150, 1028, 764, 739, 697; **HRMS** (ESI-TOF) *m/z* calcd for C<sub>21</sub>H<sub>23</sub>N<sub>3</sub>O<sub>4</sub>Na<sup>+</sup> (*M*+*Na*)<sup>+</sup> 404.1581, found 404.1579.

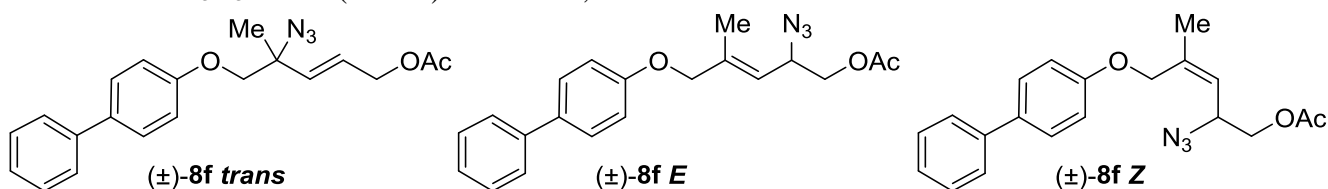

(±)-**8f**: General procedure 3 was used and the product was isolated in 87% yield (920 mg) as a yellow oil. Compound **8f** was isolated as a mixture of three isomers (1.0:1.6:0.25 *trans*:*E*:*Z*). NMR data given below is based off of idealized integrations of the resulting mixture: **<sup>1</sup>H NMR** (500 MHz, CDCl<sub>3</sub>) **8f trans** δ 7.60 – 7.52 (m, 4H), 7.47 – 7.41 (m, 2H), 7.35 – 7.30 (m, 1H), 7.04 – 6.98 (m, 2H), 6.00 (dt, *J* = 15.7, 5.6 Hz, 1H), 5.90 (dt, *J* = 15.6, 1.3 Hz, 1H), 4.66 (dd, *J* = 5.7, 1.3 Hz, 2H), 3.99 (d, *J* = 9.2 Hz, 1H), 3.96 (d, *J* = 9.2 Hz, 1H), 2.11 (s, 3H), 1.57 (s, 3H); **8f E** δ 7.60 – 7.52 (m, 4H), 7.47 – 7.41 (m, 2H), 7.35 – 7.30 (m, 1H), 7.04 – 6.98 (m, 2H), 5.58 (dq, *J* = 9.0, 1.5 Hz, 1H), 4.58 – 4.53 (m, 1H), 4.53 (s, 2H), 4.17 (dd, *J* = 11.4, 4.4 Hz, 1H), 4.06 (dd, *J* = 11.4, 7.8 Hz, 1H), 2.11 (s, 3H), 1.90 (d, *J* = 1.5 Hz, 3H); **8f Z** δ 7.60 – 7.52 (m, 4H), 7.47 – 7.41 (m, 2H), 7.35 – 7.30 (m, 1H), 7.04 – 6.98 (m, 2H), 5.42 (dq, *J* = 9.5, 1.4 Hz, 1H), 4.62 – 4.60 (m, 2H), 4.58 – 4.53 (m, 1H), 4.19 – 4.14 (m, 1H), 4.08 – 4.04 (m, 1H), 2.12 (s, 3H), 1.99 (d, *J* = 1.5 Hz, 3H); **<sup>13</sup>C NMR** (126 MHz, CDCl<sub>3</sub>) δ 170.80, 170.78, 158.12, 158.09, 158.06, 140.83, 140.80,

140.78, 139.5, 139.2, 134.7, 134.6, 134.4, 133.2, 128.90, 128.89, 128.49, 128.41, 128.37, 128.33, 126.97, 126.92, 126.89, 126.7, 122.7, 120.3, 119.4, 115.22, 115.12, 115.10, 74.27, 72.25, 67.1, 66.0, 65.8, 64.1, 63.3, 57.7, 57.6, 22.0, 21.3, 21.18, 20.91, 20.89, 14.7; **IR** (NaCl, thin film,  $\text{cm}^{-1}$ ) 3020, 2934, 2108, 1743, 1608, 1518, 1487, 1242, 1047, 833, 763, 698; **HRMS** (ESI-TOF)  $m/z$  calcd for  $\text{C}_{20}\text{H}_{21}\text{N}_3\text{O}_3\text{Na}^+$  ( $\text{M}+\text{Na}$ ) $^+$  374.1475, found 374.1480.

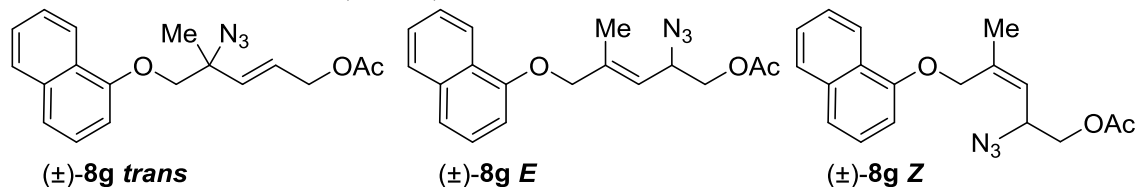

**(±)-8g**: General procedure 3 was used and the product was isolated in 29% yield (530 mg) as a yellow oil. Compound **8g** was isolated as a mixture of two isomers (1.0:1.0 *trans*:*E*). Trace amounts of **8g Z** were observed. NMR data given below is based off of idealized integrations of the resulting mixture:  **$^1\text{H}$  NMR** (500 MHz,  $\text{CDCl}_3$ ) **8g trans**  $\delta$  8.34 – 8.26 (m, 1H), 7.85 – 7.81 (m, 1H), 7.56 – 7.51 (m, 2H), 7.48 (t,  $J = 8.6$  Hz, 1H), 7.40 – 7.36 (m, 1H), 6.80 (t,  $J = 7.3$  Hz, 1H), 6.06 (dt,  $J = 15.7, 5.6$  Hz, 1H), 5.97 (dt,  $J = 15.7, 1.4$  Hz, 1H), 4.69 – 4.67 (m, 2H), 4.14 – 4.06 (m, 2H), 2.12 (s, 3H), 1.66 (s, 3H); **8g E**  $\delta$  8.34 – 8.26 (m, 1H), 7.85 – 7.81 (m, 1H), 7.56 – 7.51 (m, 2H), 7.48 (t,  $J = 8.6$  Hz, 1H), 7.40 – 7.36 (m, 1H), 6.80 (t,  $J = 7.3$  Hz, 1H), 5.68 (dq,  $J = 9.2, 1.5$  Hz, 1H), 4.67 (s, 2H), 4.59 (ddd,  $J = 9.1, 7.7, 4.3$  Hz, 1H), 4.19 (dd,  $J = 11.4, 4.4$  Hz, 1H), 4.14 – 4.06 (m, 1H), 2.11 (s, 3H), 1.97 (d,  $J = 1.4$  Hz, 3H);  **$^{13}\text{C}$  NMR** (126 MHz,  $\text{CDCl}_3$ )  $\delta$  170.80, 170.75, 154.16, 154.15, 139.3, 134.70, 134.69, 133.3, 127.67, 127.65, 126.77, 126.73, 126.6, 125.89, 125.80, 125.78, 125.65, 125.63, 125.48, 122.11, 122.05, 121.2, 120.8, 120.3, 105.3, 104.9, 74.1, 72.3, 65.8, 64.1, 63.5, 57.7, 21.7, 21.1, 20.9, 14.8; **IR** (NaCl, thin film,  $\text{cm}^{-1}$ ) 3053, 2933, 2108, 1743, 1580, 1389, 1267, 1239, 1103, 792, 772; **HRMS** (ESI-TOF)  $m/z$  calcd for  $\text{C}_{18}\text{H}_{19}\text{N}_3\text{O}_3\text{Na}^+$  ( $\text{M}+\text{Na}$ ) $^+$  348.1319, found 348.1330.

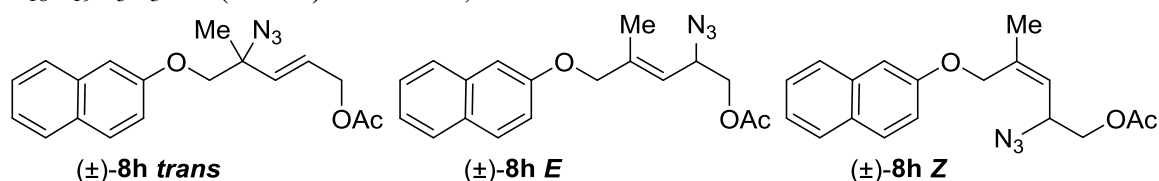

**(±)-8h**: General procedure 3 was used and the product was isolated in 64% yield (740 mg) as a yellow oil. Compound **8h** was isolated as a mixture of two isomers (1.0:1.2 *trans*:*E*). Trace amounts of **8h Z** were observed. NMR data given below is based off of idealized integrations of the resulting mixture:  **$^1\text{H}$  NMR** (500 MHz,  $\text{CDCl}_3$ ): **8h trans**  $\delta$  7.82 – 7.71 (m, 3H), 7.52 – 7.43 (m, 1H), 7.41 – 7.33 (m, 1H), 7.24 – 7.16 (m, 1H), 7.17 – 7.13 (m, 1H), 6.01 (dt,  $J = 15.7, 5.6$  Hz, 1H), 5.93 (dt,  $J = 15.7, 1.3$  Hz, 1H), 4.67 (dd,  $J = 5.6, 1.3$  Hz, 2H), 4.09 – 4.03 (m, 2H), 2.12 (s, 3H), 1.60 (s, 3H); **8h E**  $\delta$  7.82 – 7.71 (m, 3H), 7.52 – 7.43 (m, 1H), 7.41 – 7.33 (m, 1H), 7.24 – 7.16 (m, 1H), 7.17 – 7.13 (m, 1H), 5.63 (dq,  $J = 9.2, 1.5$  Hz, 1H), 4.60 (s, 2H), 4.56 (ddd,  $J = 9.2, 7.7, 4.3$  Hz, 1H), 4.17 (dd,  $J = 11.4, 4.4$  Hz, 1H), 4.09 – 4.03 (m, 1H), 2.09 (s, 3H), 1.92 (d,  $J = 1.5$  Hz, 3H);  **$^{13}\text{C}$  NMR** (126 MHz,  $\text{CDCl}_3$ )  $\delta$  170.79, 170.77, 156.51, 156.45, 156.43, 139.5, 139.2, 134.58, 134.57, 134.52, 133.2, 129.76, 129.72, 129.67, 129.38, 129.34, 129.27, 127.83, 127.80, 126.94, 126.92, 126.67, 126.66, 126.58, 124.09, 124.05, 123.96, 122.6, 120.3, 119.0, 118.9, 118.8, 107.4, 107.1, 107.0, 74.1, 72.1, 67.0, 66.0, 65.8, 64.1, 63.3, 57.7, 57.6, 22.0, 21.4, 21.1, 20.90, 20.86, 14.7; **IR** (NaCl, thin film,  $\text{cm}^{-1}$ ) 3057, 2942, 2108, 1743, 1629, 1600, 1510, 1468, 1389, 1365, 1255, 1219, 1177, 1120, 1046, 838, 749; **HRMS** (ESI-TOF)  $m/z$  calcd for  $\text{C}_{18}\text{H}_{19}\text{N}_3\text{O}_3\text{Na}^+$  ( $\text{M}+\text{Na}$ ) $^+$  348.1319, found 348.1320.

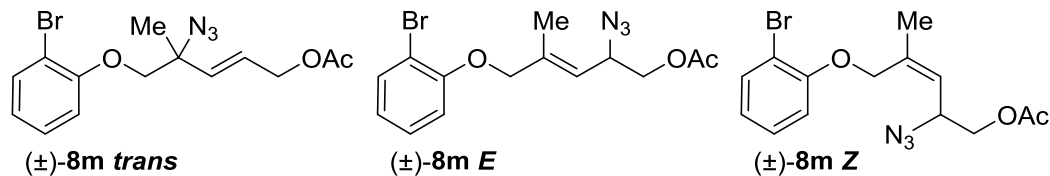

(±)-**8m**: General procedure 3 was used and the product was isolated in 74% yield (670 mg) as a yellow oil. Compound **8m** was isolated as a mixture of two isomers (1.0:1.0 *trans*:*E*). Trace amounts of **8m Z** were observed. NMR data given below is based off of idealized integrations of the resulting mixture: <sup>1</sup>H NMR (500 MHz, CDCl<sub>3</sub>) **8m trans** δ 7.59 – 7.53 (m, 1H), 7.30 – 7.23 (m, 1H), 6.95 – 6.84 (m, 2H), 6.01 (dt, *J* = 15.7, 5.5 Hz, 1H), 5.93 (dt, *J* = 15.6, 1.2 Hz, 1H), 4.65 (dd, *J* = 5.5, 1.3 Hz, 2H), 3.95 (d, *J* = 9.0 Hz, 1H), 3.92 (d, *J* = 9.1 Hz, 1H), 2.11 (s, 3H), 1.61 (s, 3H); **8m E** δ 7.59 – 7.53 (m, 1H), 7.30 – 7.23 (m, 1H), 6.95 – 6.84 (m, 2H), 5.64 (dq, *J* = 9.2, 1.5 Hz, 1H), 4.54 (s, 2H), 4.57 – 4.50 (m, 1H), 4.15 (dd, *J* = 11.4, 4.4 Hz, 1H), 4.06 (dd, *J* = 11.4, 7.6 Hz, 1H), 2.11 (s, 3H), 1.90 (d, *J* = 1.5 Hz, 3H); <sup>13</sup>C NMR (126 MHz, CDCl<sub>3</sub>) δ 170.74, 170.72, 154.9, 154.8, 138.5, 133.7, 133.63, 133.60, 133.0, 128.7, 128.59, 128.56, 126.8, 122.7, 122.6, 122.5, 120.5, 113.8, 113.5, 112.6, 112.5, 74.9, 72.9, 68.1, 66.0, 65.7, 64.1, 63.3, 57.6, 57.5, 21.9, 21.3, 21.1, 20.9, 14.6; IR (NaCl, thin film, cm<sup>-1</sup>) 2937, 2109, 1743, 1585, 1481, 1442, 1278, 1244, 1056, 1031, 750; HRMS (ESI-TOF) *m/z* calcd for C<sub>14</sub>H<sub>16</sub>BrN<sub>3</sub>O<sub>3</sub>Na<sup>+</sup> (*M*+Na)<sup>+</sup> 376.0267, found 376.0266.

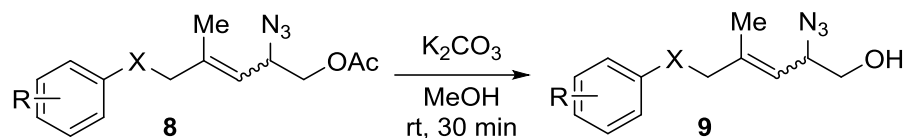

**General Procedure 4: Acetate deprotection of allylic azides:** Example given for R = *m*-OBn.

**Compound (±)-9d:** To a solution of acetate **8d** (530 mg, 1.4 mmol) in methanol (9.0 mL) at room temperature, solid potassium carbonate (580 mg, 4.2 mmol) was added. After 30 min, the reaction was quenched by the addition of water (20 mL) and the resulting solution was extracted with DCM (3 x 10 mL). The combined organic layers were dried (MgSO<sub>4</sub>), filtered, and concentrated *in vacuo* to afford alcohol **9d** (480 mg, 1.4 mmol, quantitative yield) as a clear oil of sufficient purity to advance without further purification. **Note:** Substrates **9a-c**, **9e**, **9j-l**, and **9n-o** were synthesized according to a previous publication. Characterization data for those compounds can be found in that paper.<sup>2</sup>

Compound **9d** was isolated as a mixture of three isomers (1.0:7.7:0.8 *trans*:*E*:*Z*). NMR data given below is based off of idealized integrations of the resulting mixture:

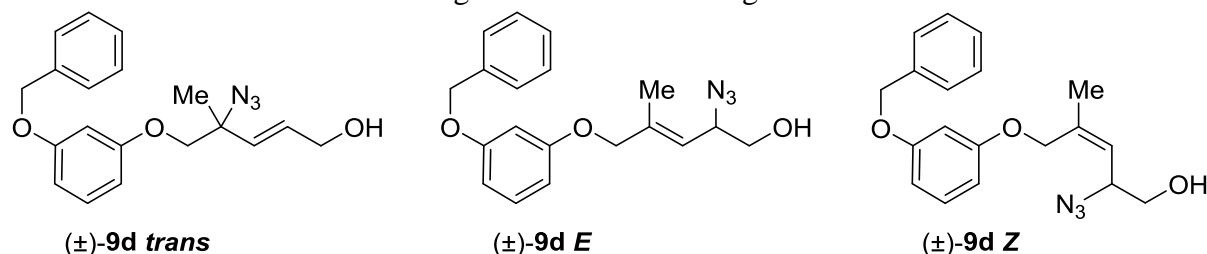

<sup>1</sup>H NMR (500 MHz, CDCl<sub>3</sub>) **9d trans** δ 7.46 – 7.43 (m, 2H), 7.42 – 7.38 (m, 2H), 7.36 – 7.31 (m, 1H), 7.22 – 7.17 (m, 1H), 6.64 – 6.59 (m, 1H), 6.59 – 6.56 (m, 1H), 6.56 – 6.51 (m, 1H), 6.03 (dt, *J* = 15.7, 5.0 Hz, 1H), 5.85 (dt, *J* = 15.7, 1.7 Hz, 1H), 5.06 (s, 2H), 4.25 (dd, *J* = 5.0, 1.7 Hz, 2H), 3.91 (d, *J* = 9.3 Hz, 1H), 3.89 (d, *J* = 9.3 Hz, 1H), 1.63 (br s, 1H), 1.52 (s, 3H); **9d E** δ 7.46 – 7.43 (m, 2H), 7.42 – 7.38 (m, 2H), 7.36 – 7.31 (m, 1H), 7.22 – 7.17 (m, 1H), 6.64 – 6.59 (m, 1H), 6.59

– 6.56 (m, 1H), 6.56 – 6.51 (m, 1H), 5.57 (dq,  $J = 9.3, 1.5$  Hz, 1H), 5.06 (s, 2H), 4.46 (s, 2H), 4.45 – 4.40 (m, 1H), 3.63 – 3.53 (m, 2H), 1.87 (d,  $J = 1.4$  Hz, 3H), 1.63 (br s, 1H); **9d Z**  $\delta$  7.46 – 7.43 (m, 2H), 7.42 – 7.38 (m, 2H), 7.36 – 7.31 (m, 1H), 7.22 – 7.17 (m, 1H), 6.64 – 6.59 (m, 1H), 6.59 – 6.56 (m, 1H), 6.56 – 6.51 (m, 1H), 5.44 (dq,  $J = 9.8, 1.0$  Hz, 1H), 5.06 (s, 2H), 4.55 (d,  $J = 11.5$ , Hz, 1H), 4.51 (d,  $J = 12.0$  Hz, 1H), 4.51 – 4.47 (m, 1H), 3.63 – 3.53 (m, 2H), 1.96 (d,  $J = 1.5$  Hz, 3H), 1.63 (br s, 1H);  $^{13}\text{C NMR}$  (126 MHz,  $\text{CDCl}_3$ )  $\delta$  160.2, 159.8, 139.3, 139.1, 137.1, 131.7, 130.17, 130.13, 130.10, 128.7, 128.1, 127.66, 127.64, 123.3, 120.8, 107.9, 107.8, 107.7, 107.5, 107.4, 107.3, 102.4, 102.3, 74.3, 72.4, 70.22, 70.20, 67.2, 65.2, 65.0, 63.4, 62.9, 61.2, 61.1, 22.1, 21.4, 14.7; **IR** ( $\text{NaCl}$ , thin film,  $\text{cm}^{-1}$ ) 3424, 3031, 2924, 2872, 2105, 1592, 1491, 1453, 1288, 1261, 1176, 1149, 1027, 737, 697; **HRMS** (ESI-TOF)  $m/z$  calcd for  $\text{C}_{19}\text{H}_{21}\text{N}_3\text{O}_3\text{Na}^+$  ( $\text{M}+\text{Na}$ ) $^+$  362.1475, found 362.1471.

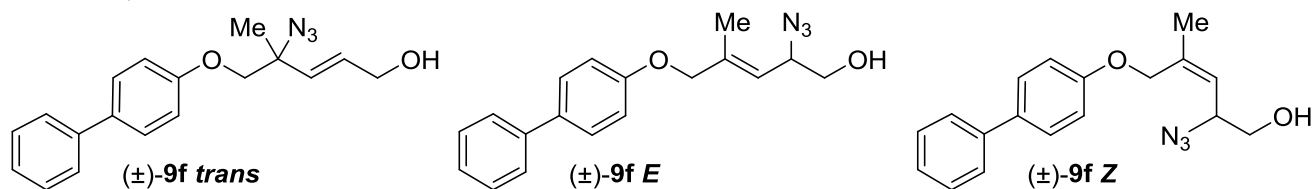

( $\pm$ )-**9f**: General procedure 4 was used and the product was isolated in 97% (730 mg) yield as a yellow oil. Compound **9f** was isolated as a mixture of three isomers (1.0:4.2:0.75 *trans*:*E*:*Z*). NMR data given below is based off of idealized integrations of the resulting mixture:  $^1\text{H NMR}$  (500 MHz,  $\text{CDCl}_3$ ) **9f trans**  $\delta$  7.59 – 7.51 (m, 4H), 7.43 (t,  $J = 7.8$  Hz, 2H), 7.35 – 7.29 (m, 1H), 7.03 – 6.98 (m, 2H), 6.06 (dt,  $J = 15.8, 5.0$  Hz, 1H), 5.89 (dt,  $J = 15.7, 1.7$  Hz, 1H), 4.28 – 4.24 (m, 2H), 3.99 (d,  $J = 9.3$  Hz, 1H), 3.96 (d,  $J = 9.2$  Hz, 1H), 1.87 (br s, 1H); 1.56 (s, 3H); **9f E**  $\delta$  7.59 – 7.51 (m, 4H), 7.43 (t,  $J = 7.8$  Hz, 2H), 7.35 – 7.29 (m, 1H), 7.03 – 6.98 (m, 2H), 5.62 (dq,  $J = 9.4, 1.5$  Hz, 1H), 4.53 (s, 2H), 4.46 (ddd,  $J = 9.4, 7.1, 4.7$  Hz, 1H), 3.66 – 3.55 (m, 2H), 1.90 (d,  $J = 1.5$  Hz, 3H), 1.87 (br s, 1H); **9f Z**  $\delta$  7.59 – 7.51 (m, 4H), 7.43 (t,  $J = 7.8$  Hz, 2H), 7.35 – 7.29 (m, 1H), 7.03 – 6.98 (m, 2H), 5.47 (dq,  $J = 9.6, 1.2$  Hz, 1H), 4.63 (d,  $J = 11.5$  Hz, 1H), 4.59 (d,  $J = 11.7$  Hz, 1H), 4.55 – 4.52 (m, 1H), 3.66 – 3.55 (m, 2H), 2.00 (d,  $J = 1.5$  Hz, 3H), 1.87 (br s, 1H),  $^{13}\text{C NMR}$  (126 MHz,  $\text{CDCl}_3$ )  $\delta$  158.1, 140.9, 140.8, 139.4, 139.2, 134.7, 134.4, 131.8, 130.2, 128.92, 128.91, 128.44, 128.39, 128.36, 126.97, 126.95, 126.92, 123.4, 120.8, 115.3, 115.16, 115.11, 74.4, 72.5, 67.2, 65.2, 65.0, 63.4, 63.0, 61.3, 61.2, 22.2, 21.5, 14.8; **IR** ( $\text{NaCl}$ , thin film,  $\text{cm}^{-1}$ ) 3369, 2920, 2868, 2107, 1606, 1488, 1246, 1043, 831, 763, 692; **HRMS** (ESI-TOF)  $m/z$  calcd for  $\text{C}_{18}\text{H}_{19}\text{N}_3\text{O}_2\text{Na}^+$  ( $\text{M}+\text{Na}$ ) $^+$  332.1369, found 332.1374.

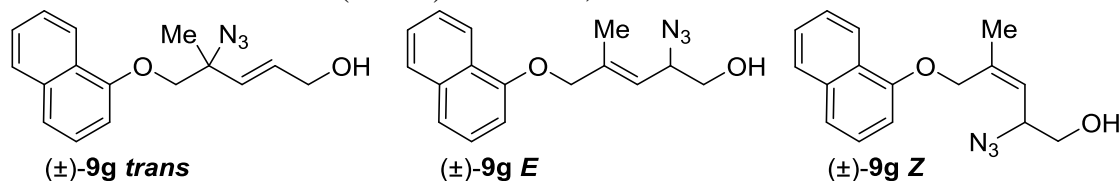

( $\pm$ )-**9g**: General procedure 4 was used and the product was isolated in 99% yield (410 mg) as a yellow oil. Compound **9g** was isolated as a mixture of three isomers (1.0:3.8:0.6 *trans*:*E*:*Z*). NMR data given below is based off of idealized integrations of the resulting mixture:  $^1\text{H NMR}$  (500 MHz,  $\text{CDCl}_3$ ) **9g trans**  $\delta$  8.34 – 8.24 (m, 1H), 7.85 – 7.80 (m, 1H), 7.56 – 7.47 (m, 2H), 7.46 (d,  $J = 8.0$  Hz, 1H), 7.38 (t,  $J = 7.9$  Hz, 1H), 6.87 – 6.77 (m, 1H), 6.11 (dt,  $J = 15.7, 5.0$  Hz, 1H), 5.94 (dt,  $J = 15.7, 1.7$  Hz, 1H), 4.27 (dd,  $J = 5.0, 1.7$  Hz, 2H), 4.12 (d,  $J = 9.1$  Hz, 1H), 4.09 (d,  $J = 9.2$  Hz, 1H), 1.96 (br s, 1H), 1.65 (s, 3H); **9g E**  $\delta$  8.34 – 8.24 (m, 1H), 7.85 – 7.80 (m, 1H), 7.56 – 7.47 (m, 2H), 7.46 (d,  $J = 8.0$  Hz, 1H), 7.38 (t,  $J = 7.9$  Hz, 1H), 6.87 – 6.77 (m, 1H), 5.70 (dq,  $J = 9.3,$

1.5 Hz, 1H), 4.68 (s, 2H), 4.50 (ddd,  $J = 9.4, 7.3, 4.7$  Hz, 1H), 3.67 – 3.55 (m, 2H), 1.97 (d,  $J = 1.4$  Hz, 3H), 1.96 (br s, 1H); **9g Z**  $\delta$  8.34 – 8.24 (m, 1H), 7.85 – 7.80 (m, 1H), 7.56 – 7.47 (m, 2H), 7.46 (d,  $J = 8.0$  Hz, 1H), 7.38 (t,  $J = 7.9$  Hz, 1H), 6.87 – 6.77 (m, 1H), 5.52 (dq,  $J = 9.3, 1.5$  Hz, 1H), 4.78 (d,  $J = 11.4$  Hz, 1H), 4.74 (d,  $J = 11.4$  Hz, 1H), 4.57 – 4.53 (m, 1H), 3.67 – 3.55 (m, 2H), 2.08 (d,  $J = 1.5$  Hz, 3H), 1.96 (br s, 1H);  $^{13}\text{C}$  NMR (126 MHz,  $\text{CDCl}_3$ )  $\delta$  154.4, 154.23, 154.21, 139.6, 139.2, 134.71, 134.69, 131.8, 130.3, 127.69, 127.66, 126.73, 126.70, 126.63, 125.91, 125.88, 125.83, 125.80, 125.76, 125.66, 125.57, 125.49, 123.2, 122.15, 122.08, 122.05, 121.14, 121.03, 120.84, 120.80, 105.4, 105.0, 104.9, 74.3, 72.5, 67.1, 65.2, 65.0, 63.7, 62.9, 61.3, 61.1, 53.6, 22.2, 21.8, 14.9; **IR** (NaCl, thin film,  $\text{cm}^{-1}$ ) 3363, 3053, 2924, 2872, 2105, 1595, 1580, 1508, 1461, 1402, 1268, 1241, 1097, 1067, 791, 771; **HRMS** (ESI-TOF)  $m/z$  calcd for  $\text{C}_{16}\text{H}_{17}\text{N}_3\text{O}_2\text{Na}^+$  ( $\text{M}+\text{Na}$ ) $^+$  306.1213, found 306.1216.

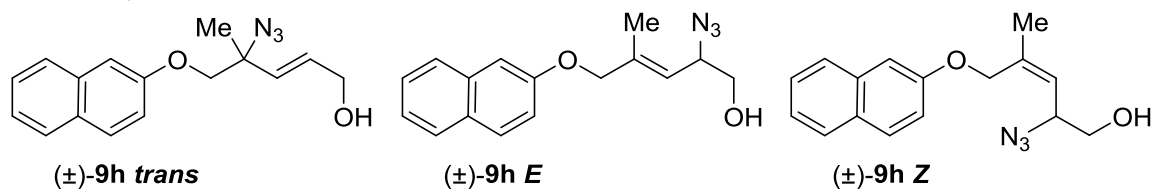

(±)-**9h**: General procedure 4 was used and the product was isolated in 98% yield (580 mg) as a yellow oil. Compound **9h** was isolated as a mixture of three isomers (1.0:4.0:0.7 *trans*:*E*:*Z*). NMR data given below is based off of idealized integrations of the resulting mixture:  $^1\text{H}$  NMR (500 MHz,  $\text{CDCl}_3$ ) **9h trans**  $\delta$  7.81 – 7.71 (m, 3H), 7.50 – 7.42 (m, 1H), 7.41 – 7.33 (m, 1H), 7.24 – 7.17 (m, 1H), 7.19 – 7.12 (m, 1H), 6.07 (dt,  $J = 15.8, 5.0$  Hz, 1H), 5.91 (dt,  $J = 15.7, 1.8$  Hz, 1H), 4.27 (dd,  $J = 5.0, 1.7$  Hz, 2H), 4.07 (d,  $J = 9.3$  Hz, 1H), 4.04 (d,  $J = 9.2$  Hz, 1H), 1.95 (br s, 1H), 1.59 (s, 3H); **9h E**  $\delta$  7.81 – 7.71 (m, 3H), 7.50 – 7.42 (m, 1H), 7.41 – 7.33 (m, 1H), 7.24 – 7.17 (m, 1H), 7.19 – 7.12 (m, 1H), 5.66 (dq,  $J = 9.4, 1.6$  Hz, 1H), 4.61 (s, 2H), 4.48 (ddd,  $J = 9.3, 7.2, 4.6$  Hz, 1H), 3.67 – 3.55 (m, 2H), 1.95 (br s, 1H), 1.93 (d,  $J = 1.4$  Hz, 3H); **9h Z**  $\delta$  7.81 – 7.71 (m, 3H), 7.50 – 7.42 (m, 1H), 7.41 – 7.33 (m, 1H), 7.24 – 7.17 (m, 1H), 7.19 – 7.12 (m, 1H), 5.49 (dq,  $J = 9.7, 1.6$  Hz, 1H), 4.71 (d,  $J = 11.6$  Hz, 1H), 4.67 (d,  $J = 11.4$  Hz, 1H), 4.59 – 4.52 (m, 1H), 3.67 – 3.55 (m, 2H), 2.02 (d,  $J = 1.5$  Hz, 3H), 1.95 (br s, 1H);  $^{13}\text{C}$  NMR (126 MHz,  $\text{CDCl}_3$ )  $\delta$  156.54, 156.49, 139.4, 139.1, 134.60, 134.58, 134.54, 131.8, 130.2, 129.78, 129.72, 129.68, 129.37, 129.35, 129.28, 127.84, 127.81, 127.0, 126.9, 126.69, 126.66, 126.60, 124.1, 124.0, 123.4, 120.8, 119.0, 118.9, 107.4, 107.1, 107.0, 74.3, 72.3, 67.1, 65.2, 65.0, 63.4, 62.9, 61.3, 61.2, 22.2, 21.5, 14.8; **IR** (NaCl, thin film,  $\text{cm}^{-1}$ ) 3385, 3057, 2922, 2872, 2104, 1629, 1600, 1510, 1469, 1389, 1257, 1216, 1177, 1120, 1043, 1010, 837, 748; **HRMS** (ESI-TOF)  $m/z$  calcd for  $\text{C}_{16}\text{H}_{17}\text{N}_3\text{O}_2\text{Na}^+$  ( $\text{M}+\text{Na}$ ) $^+$  306.1213, found 306.1212.

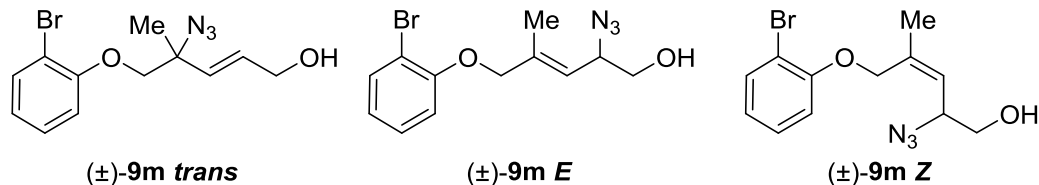

(±)-**9m**: General procedure 4 was used and the product was isolated in quantitative yield (540 mg) as a yellow oil. Compound **9m** was isolated as a mixture of three isomers (1.0:4.0:0.6 *trans*:*E*:*Z*). NMR data given below is based off of idealized integrations of the resulting mixture:  $^1\text{H}$  NMR (500 MHz,  $\text{CDCl}_3$ ) **9m trans**  $\delta$  7.58 – 7.52 (m, 1H), 7.30 – 7.22 (m, 1H), 6.94 – 6.81 (m, 2H), 6.06 (dt,  $J = 15.7, 5.1$  Hz, 1H), 5.89 (dt,  $J = 15.7, 1.7$  Hz, 1H), 4.24 (m, 2H), 3.94 (d,  $J = 9.1$  Hz, 1H), 3.91 (d,  $J = 9.1$  Hz, 1H), 2.07 (br s, 1H), 1.60 (s, 3H); **9m E**  $\delta$  7.58 – 7.52 (m, 1H), 7.30 – 7.22 (m, 1H), 6.94 – 6.81 (m, 2H), 5.65 (dq,  $J = 9.4, 1.5$  Hz, 1H), 4.54 (s, 2H), 4.44 (ddd,  $J = 9.3, 7.1, 4.7$



Hz, 1H), 3.64 – 3.55 (m, 2H), 2.07 (br s, 1H), 1.90 (d,  $J = 1.6$  Hz, 3H); **9m Z**  $\delta$  7.58 – 7.52 (m, 1H), 7.30 – 7.22 (m, 1H), 6.94 – 6.81 (m, 2H), 5.46 (dq,  $J = 9.6, 1.4$  Hz, 1H), 4.66 (d,  $J = 11.7$  Hz, 1H), 4.58 (d,  $J = 11.9$  Hz, 1H), 4.58 – 4.54 (m, 1H), 3.64 – 3.55 (m, 2H), 2.07 (br s, 1H), 2.01 (d,  $J = 1.6$  Hz, 3H);  $^{13}\text{C}$  NMR (126 MHz,  $\text{CDCl}_3$ )  $\delta$  154.9, 154.8, 138.7, 138.5, 133.7, 133.61, 133.59, 131.9, 130.0, 128.66, 128.61, 128.57, 123.4, 122.72, 122.67, 122.5, 121.0, 113.9, 113.8, 113.5, 112.6, 112.5, 75.0, 73.2, 68.2, 65.2, 64.9, 63.4, 62.9, 61.2, 61.0, 22.1, 21.4, 14.7; **IR** (NaCl, thin film,  $\text{cm}^{-1}$ ) 3359, 2926, 2873, 2106, 1585, 1480, 1442, 1279, 1247, 1056, 1031, 748; **HRMS** (ESI-TOF)  $m/z$  calcd for  $\text{C}_{12}\text{H}_{14}\text{BrN}_3\text{O}_2\text{Na}^+$  ( $\text{M}+\text{Na}$ ) $^+$  334.0162, found 334.0154.

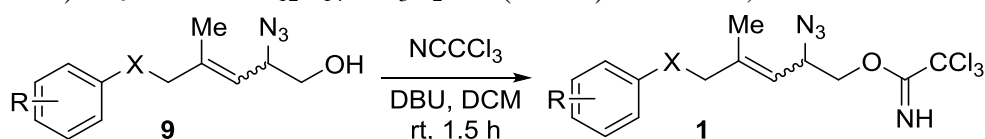

**General Procedure 5: Installation of Trichloroacetimidate:** Example given for  $\text{R} = m\text{-OBn}$ .

**Compound ( $\pm$ )-1d:** To solution of alcohol **1d** (437 mg, 1.3 mmol) in DCM (13 mL) at room temperature, trichloroacetonitrile (0.26 mL, 2.6 mmol), and DBU (48  $\mu\text{L}$ , 0.32 mmol, 25 mol %) were sequentially added. After 90 min, the solution was concentrated *in vacuo* and loaded onto a column cartridge. Final purification by column chromatography (0 to 80% gradient, EtOAc in hexanes) afforded trichloroacetimidate **1d** (531 mg, 1.1 mmol, 85%) as a yellow oil. **Note:** Substrates **1a-c**, **1e**, **1j-l**, and **1n-o** were synthesized according to a previous publication. Characterization data for those compounds can be found in that paper.<sup>2</sup>

Compound **1d** was isolated as a mixture of three isomers (1:1.4:0.25 *trans*:*E*:*Z*). NMR data given below is based off of idealized integrations of the resulting mixture:

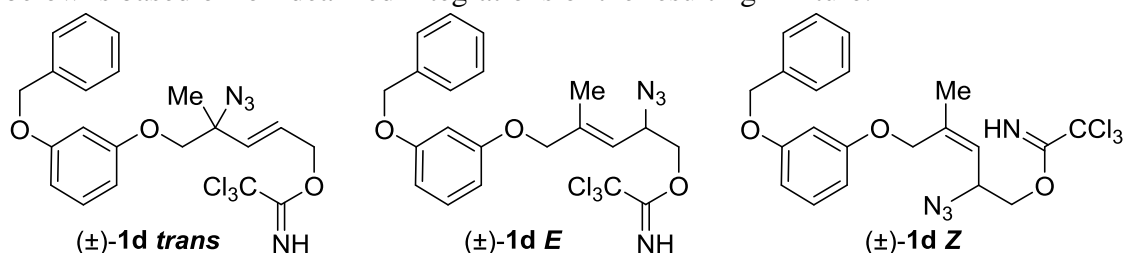

$^1\text{H}$  NMR (400 MHz,  $\text{CDCl}_3$ ) **1d trans**  $\delta$  8.39 (s, 1H), 7.48 – 7.38 (m, 4H), 7.38 – 7.31 (m, 1H), 7.24 – 7.16 (m, 1H), 6.66 – 6.51 (m, 3H), 6.08 (dt,  $J = 15.8, 5.1$  Hz, 1H), 6.00 (dt,  $J = 15.8, 1.2$  Hz, 1H), 5.05 – 4.98 (m, 2H), 4.90 (dd,  $J = 5.1, 1.1$  Hz, 2H), 3.94 (d,  $J = 9.4$  Hz, 1H), 3.91 (d,  $J = 9.4$  Hz, 1H), 1.55 (s, 3H); **1d E**  $\delta$  8.43 (s, 1H), 7.48 – 7.38 (m, 4H), 7.38 – 7.31 (m, 1H), 7.24 – 7.16 (m, 1H), 6.66 – 6.51 (m, 3H), 5.63 (dq,  $J = 9.1, 1.5$  Hz, 1H), 5.07 (s, 2H), 4.68 (ddd,  $J = 9.2, 7.0, 4.7$  Hz, 1H), 4.46 (s, 2H), 4.37 – 4.27 (m, 2H), 1.90 (d,  $J = 1.4$  Hz, 3H); **1d Z**  $\delta$  8.43 (s, 1H), 7.48 – 7.38 (m, 4H), 7.38 – 7.31 (m, 1H), 7.24 – 7.16 (m, 1H), 6.66 – 6.51 (m, 3H), 5.46 (dq,  $J = 9.4, 1.4$  Hz, 1H), 5.07 (s, 2H), 4.78 (ddd,  $J = 9.4, 7.2, 4.6$  Hz, 1H), 4.58 (s, 2H), 4.37 – 4.27 (m, 2H), 1.97 (d,  $J = 1.5$  Hz, 3H);  $^{13}\text{C}$  NMR (126 MHz,  $\text{CDCl}_3$ )  $\delta$  162.7, 162.5, 160.2, 159.81, 159.75, 139.3, 137.1, 137.0, 133.5, 130.20, 130.16, 130.13, 128.77, 128.74, 128.18, 128.16, 127.7, 125.8, 122.4, 120.1, 107.9, 107.8, 107.6, 107.5, 107.3, 102.4, 102.3, 91.1, 74.2, 72.2, 70.34, 70.24, 70.22, 68.6, 63.3, 57.4, 22.0, 21.4, 14.7; **IR** (NaCl, thin film,  $\text{cm}^{-1}$ ) 3339, 3032, 2918, 2871, 2107, 1664, 1592, 1490, 1453, 1290, 1150, 1083, 831, 796, 647; **HRMS** (ESI-TOF)  $m/z$  calcd for  $\text{C}_{21}\text{H}_{21}\text{Cl}_3\text{N}_4\text{O}_3\text{Na}^+$  ( $\text{M}+\text{Na}$ ) $^+$  505.0571, found 505.0571.

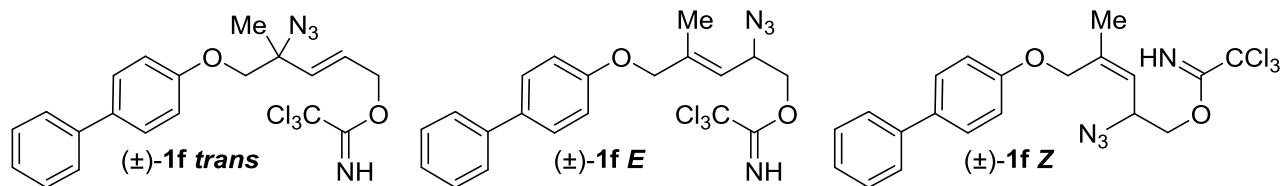

(±)-**1f**: General procedure 5 was used and the product was isolated in 97% yield (890 mg) as a yellow oil. Compound **1f** was isolated as a mixture of three isomers (1.0:2.6:0.4 *trans*:*E*:*Z*). NMR data given below is based off of idealized integrations of the resulting mixture: **<sup>1</sup>H NMR** (500 MHz, CDCl<sub>3</sub>) **1f trans** δ 8.38 (s, 1H), 7.58 – 7.51 (m, 4H), 7.46 – 7.40 (m, 2H), 7.35 – 7.29 (m, 1H), 7.03 – 6.96 (m, 2H), 6.09 (dt, *J* = 15.8, 5.2 Hz, 1H), 6.02 (dt, *J* = 15.7, 1.2 Hz, 1H), 4.90 (dd, *J* = 5.2, 1.2 Hz, 2H), 4.00 (d, *J* = 9.2 Hz, 1H), 3.97 (d, *J* = 9.3 Hz, 1H), 1.57 (s, 3H); **1f E** δ 8.42 (s, 1H), 7.58 – 7.51 (m, 4H), 7.46 – 7.40 (m, 2H), 7.35 – 7.29 (m, 1H), 7.03 – 6.96 (m, 2H), 5.66 (dq, *J* = 9.2, 1.5 Hz, 1H), 4.69 (ddd, *J* = 9.1, 7.0, 4.7 Hz, 1H), 4.53 (s, 2H), 4.34 (dd, *J* = 11.1, 4.6 Hz, 1H), 4.30 (dd, *J* = 11.2, 7.1 Hz, 1H), 1.92 (d, *J* = 1.4 Hz, 3H); **1f Z** δ 8.42 (s, 1H), 7.58 – 7.51 (m, 4H), 7.46 – 7.40 (m, 2H), 7.35 – 7.29 (m, 1H), 7.03 – 6.96 (m, 2H), 5.48 (dq, *J* = 9.3, 1.3 Hz, 1H), 4.80 (ddd, *J* = 9.4, 7.2, 4.6 Hz, 1H), 4.65 – 4.63 (m, 2H), 4.36 – 4.32 (m, 1H), 4.32 – 4.28 (m, 1H), 1.99 (d, *J* = 1.5 Hz, 3H); **<sup>13</sup>C NMR** (126 MHz, CDCl<sub>3</sub>) δ 162.7, 162.5, 158.17, 158.14, 158.11, 140.9, 140.8, 139.6, 139.3, 134.7, 134.6, 134.4, 133.6, 128.91, 128.89, 128.42, 128.39, 128.36, 126.98, 126.94, 126.92, 126.90, 125.8, 122.5, 120.2, 115.23, 115.17, 115.15, 91.2, 74.3, 72.3, 70.6, 70.3, 68.6, 67.3, 63.4, 57.4, 22.0, 21.4, 14.7; **IR** (NaCl, thin film, cm<sup>-1</sup>) 3339, 3032, 2922, 2107, 1666, 1608, 1518, 1487, 1292, 1243, 1075, 1005, 832, 796, 763, 647; **HRMS** (ESI-TOF) *m/z* calcd for C<sub>20</sub>H<sub>19</sub>Cl<sub>3</sub>N<sub>4</sub>O<sub>2</sub>Na<sup>+</sup> (*M*+*Na*)<sup>+</sup> 475.0466, found 475.0465.

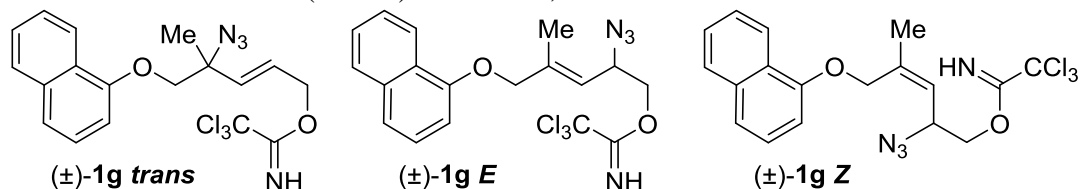

(±)-**1g**: General procedure 5 was used and the product was isolated in 74% yield (410 mg) as a yellow oil. Compound **1g** was isolated as a mixture of two isomers (1.0:1.4 *trans*:*E*). Trace amounts of **1g Z** were observed. NMR data given below is based off of idealized integrations of the resulting mixture: **<sup>1</sup>H NMR** (500 MHz, CDCl<sub>3</sub>) **1g trans** δ 8.38 (s, 1H), 8.32 – 8.25 (m, 1H), 7.84 – 7.79 (m, 1H), 7.54 – 7.44 (m, 3H), 7.41 – 7.35 (m, 1H), 6.84 – 6.77 (m, 1H), 6.17 (dt, *J* = 15.8, 4.8 Hz, 1H), 6.11 (dt, *J* = 15.7, 1.2 Hz, 1H), 4.92 (dd, *J* = 4.6, 1.0 Hz, 2H), 4.14 (d, *J* = 9.2 Hz, 1H), 4.12 (d, *J* = 9.2 Hz, 1H), 1.66 (s, 3H); **1g E** δ 8.43 (s, 1H), 8.32 – 8.25 (m, 1H), 7.84 – 7.79 (m, 1H), 7.54 – 7.44 (m, 3H), 7.41 – 7.35 (m, 1H), 6.84 – 6.77 (m, 1H), 5.79 (dq, *J* = 9.2, 1.5 Hz, 1H), 4.73 (ddd, *J* = 9.2, 6.9, 4.6 Hz, 1H), 4.68 (s, 2H), 4.38 (dd, *J* = 11.1, 4.6 Hz, 1H), 4.34 (dd, *J* = 11.2, 6.9 Hz, 1H), 1.99 (d, *J* = 1.5 Hz, 3H); **<sup>13</sup>C NMR** (126 MHz, CDCl<sub>3</sub>) δ 162.7, 162.5, 154.19, 154.17, 139.4, 134.72, 134.70, 133.60, 127.68, 127.65, 126.75, 126.65, 125.92 (2C), 125.80, 125.78, 125.70, 125.64, 125.5, 122.2, 122.1, 121.2, 120.8, 120.0, 105.2, 104.9, 91.4, 91.2, 74.2, 72.2, 70.4, 68.5, 63.6, 57.3, 21.8, 14.9; **IR** (NaCl, thin film, cm<sup>-1</sup>) 3340, 3054, 2933, 2108, 1666, 1580, 1403, 1390, 1304, 1269, 1241, 1099, 1072, 1019, 827, 794, 771, 647; **HRMS** (ESI-TOF) *m/z* calcd for C<sub>18</sub>H<sub>17</sub>Cl<sub>3</sub>N<sub>4</sub>O<sub>2</sub>Na<sup>+</sup> (*M*+*Na*)<sup>+</sup> 449.0309, found 449.0306.

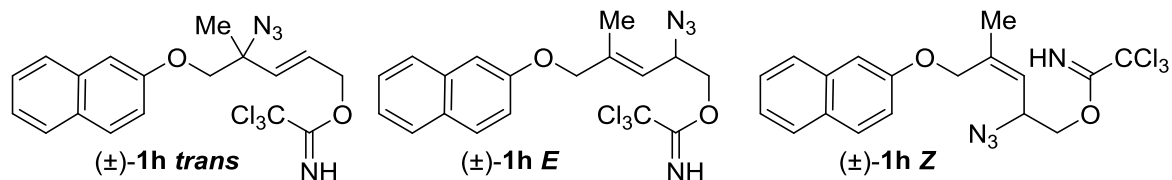

(±)-**1h**: General procedure 5 was used and the product was isolated in 85% yield (690 mg) as a yellow oil. Compound **1h** was isolated as a mixture of two isomers (1.0:1.8 *trans*:*E*). Trace amounts of **1h Z** were observed. NMR data given below is based off of idealized integrations of the resulting mixture: <sup>1</sup>H NMR (500 MHz, CDCl<sub>3</sub>) **1h trans** δ 8.41 (s, 1H), 7.83 – 7.72 (m, 3H), 7.52 – 7.44 (m, 1H), 7.41 – 7.35 (m, 1H), 7.23 – 7.18 (m, 1H), 7.17 – 7.15 (m, 1H), 6.13 (dt, *J* = 15.8, 5.1 Hz, 1H), 6.06 (dt, *J* = 15.7, 1.2 Hz, 1H), 4.92 (dd, *J* = 5.2, 1.1 Hz, 2H), 4.09 (d, *J* = 9.3 Hz, 1H), 4.06 (d, *J* = 9.3 Hz, 1H), 1.61 (s, 3H); **1h E** δ 8.44 (s, 1H), 7.83 – 7.72 (m, 3H), 7.52 – 7.44 (m, 1H), 7.41 – 7.35 (m, 1H), 7.23 – 7.18 (m, 1H), 7.17 – 7.15 (m, 1H), 5.72 (dq, *J* = 9.2, 1.5 Hz, 1H), 4.75 – 4.68 (m, 1H), 4.61 (s, 2H), 4.37 (dd, *J* = 11.2, 4.7 Hz, 1H), 4.33 (dd, *J* = 11.2, 7.0 Hz, 1H), 1.96 (d, *J* = 1.6 Hz, 3H); <sup>13</sup>C NMR (126 MHz, CDCl<sub>3</sub>) δ 162.62, 162.59, 162.4, 156.52, 156.46, 156.42, 139.5, 139.2, 134.58, 134.56, 134.51, 133.5, 129.75, 129.71, 129.66, 129.37, 129.32, 129.26, 127.82, 127.79, 126.94, 126.91, 126.66, 126.65, 126.57, 125.8, 124.1, 124.0, 123.9, 122.5, 120.2, 119.0, 118.9, 118.8, 107.3, 107.1, 107.0, 91.4, 91.1, 74.1, 72.1, 70.6, 70.3, 68.5, 67.1, 63.3, 60.5, 57.32, 57.30, 22.0, 21.4, 21.2, 14.8, 14.4; IR (NaCl, thin film, cm<sup>-1</sup>) 3339, 3059, 2922, 2108, 1666, 1629, 1600, 1511, 1468, 1389, 1304, 1256, 1217, 1177, 1079, 1008, 835, 797, 647; HRMS (ESI-TOF) *m/z* calcd for C<sub>18</sub>H<sub>17</sub>Cl<sub>3</sub>N<sub>4</sub>O<sub>2</sub>Na<sup>+</sup> (M+Na)<sup>+</sup> 449.0309, found 449.0319.

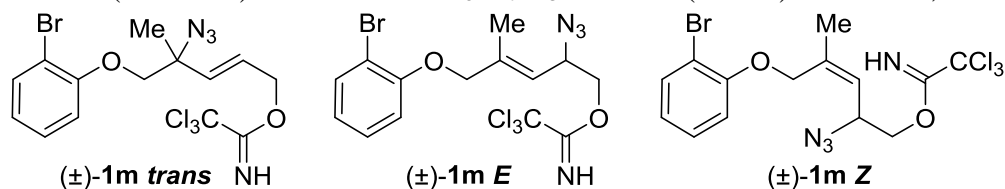

(±)-**1m**: General procedure 5 was used and the product was isolated in 73% yield (500 mg) as a yellow oil. Compound **1m** was isolated as a mixture of three isomers (1.0:1.6:0.3 *trans*:*E*:*Z*). NMR data given below is based off of idealized integrations of the resulting mixture: <sup>1</sup>H NMR (500 MHz, CDCl<sub>3</sub>) **1m trans** δ 8.38 (s, 1H), 7.59 – 7.50 (m, 1H), 7.33 – 7.20 (m, 1H), 6.96 – 6.79 (m, 2H), 6.11 (dt, *J* = 15.7, 5.1 Hz, 1H), 6.04 (dt, *J* = 15.8, 1.2 Hz, 1H), 4.89 (dd, *J* = 5.1, 1.2 Hz, 2H), 3.96 (d, *J* = 9.0 Hz, 1H), 3.93 (d, *J* = 9.1 Hz, 1H), 1.62 (s, 3H); **1m E** δ 8.42 (s, 1H), 7.59 – 7.50 (m, 1H), 7.33 – 7.20 (m, 1H), 6.96 – 6.79 (m, 2H), 5.71 (dq, *J* = 9.1, 1.5 Hz, 1H), 4.67 (ddd, *J* = 9.1, 7.0, 4.7 Hz, 1H), 4.55 (s, 2H), 4.34 (dd, *J* = 11.1, 4.7 Hz, 1H), 4.30 (dd, *J* = 11.1, 6.9 Hz, 1H), 1.93 (d, *J* = 1.4 Hz, 3H); **1m Z** δ 8.42 (s, 1H), 7.59 – 7.50 (m, 1H), 7.33 – 7.20 (m, 1H), 6.96 – 6.79 (m, 2H), 5.47 (dq, *J* = 9.4, 1.4 Hz, 1H), 4.91 – 4.85 (m, 1H), 4.68 – 4.65 (m, 2H), 4.35 (dd, *J* = 11.0, 4.6 Hz, 1H), 4.28 (dd, *J* = 11.2, 7.3 Hz, 1H), 2.00 (d, *J* = 1.5 Hz, 3H); <sup>13</sup>C NMR (126 MHz, CDCl<sub>3</sub>) δ 162.7, 162.6, 162.5, 154.9, 154.8, 138.9, 138.7, 133.8, 133.7, 133.6, 133.3, 128.65, 128.60, 128.58, 126.0, 122.8, 122.7, 122.5, 122.4, 120.4, 113.7, 113.5, 112.7, 112.5, 91.4, 91.1, 74.9, 72.9, 70.6, 70.3, 68.6, 68.3, 63.4, 57.3, 57.2, 21.9, 21.4, 14.7; IR (NaCl, thin film, cm<sup>-1</sup>) 3340, 2924, 2108, 1666, 1585, 1480, 1442, 1293, 1246, 1064, 1031, 1011, 830, 797, 748, 647; HRMS (ESI-TOF) *m/z* calcd for C<sub>14</sub>H<sub>14</sub>BrCl<sub>3</sub>N<sub>4</sub>O<sub>2</sub>Na<sup>+</sup> (M+Na)<sup>+</sup> 476.9258, found 476.9245.

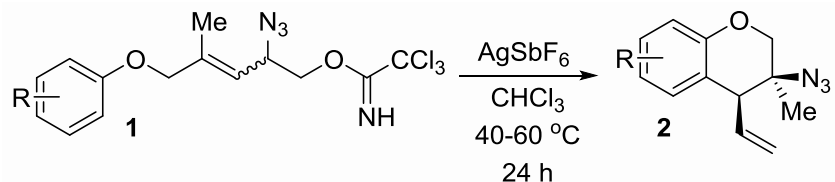

**General Procedure 6: Silver Catalyzed Resolution of Allylic Azides via Friedel-Crafts Alkylation:** Example given for R = *m*-OBn. **Compound (±)-2d:** In a glovebox, a 50 mL round bottom flask was sequentially charged with imidate **1a** (360 mg, 0.75 mmol) and silver hexafluoroantimonate (12.3 mg, 37  $\mu\text{mol}$ , 5 mol %). To the mixture,  $\text{CHCl}_3$  (7.5 mL, see note below) was added. The vial was sealed, removed from the glovebox, and placed on a hot plate set to 50  $^\circ\text{C}$  (external thermocouple) with a stir rate of 400 rpm. After 24 h, the resulting mixture was concentrated *in vacuo* and filtered through a short plug of silica (1:1 DCM:hexanes). Final purification by column chromatography (0 to 20% gradient, EtOAc in hexanes) afforded the product as two separable regioisomers (**2d-A** and **2d-B**) in a 1:3.5 ratio in 64% overall yield. **2d-A** (34 mg, 0.10 mmol, 14%) was isolated as a clear oil in a 15:1 dr. **2d-B** (116 mg, 0.37 mmol, 49%) was isolated as a white solid in >25:1 dr. Note: Substrates **2a-c**, **2e**, **2j-l**, and **2n-o** were synthesized according to a previous publication. Characterization data for those compounds can be found in that paper.<sup>2</sup>

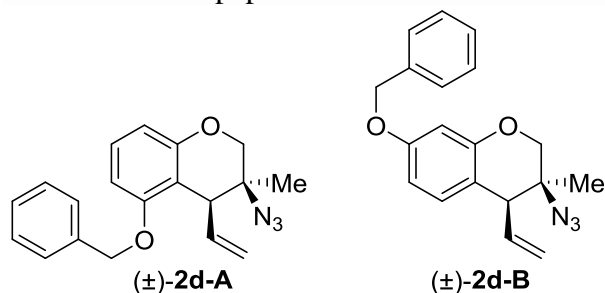

**(±)-2d-B:**  $^1\text{H NMR}$  (500 MHz,  $\text{CDCl}_3$ )  $\delta$  7.43 (d,  $J = 7.0$  Hz, 2H), 7.42 – 7.37 (m, 2H), 7.36 – 7.31 (m, 1H), 6.98 (d,  $J = 8.5$  Hz, 1H), 6.60 (dd,  $J = 8.5, 2.6$  Hz, 1H), 6.52 (d,  $J = 2.5$  Hz, 1H), 5.82 (ddd,  $J = 17.0, 10.0, 9.0$  Hz, 1H), 5.42 (dd,  $J = 10.1, 1.8$  Hz, 1H), 5.26 (ddd,  $J = 16.9, 1.7, 0.7$  Hz, 1H), 5.03 (s, 2H), 4.18 (d,  $J = 11.3$  Hz, 1H), 3.90 (dd,  $J = 11.3, 0.8$  Hz, 1H), 3.34 (br d,  $J = 8.9$  Hz, 1H), 1.40 (s, 3H);  $^{13}\text{C NMR}$  (126 MHz,  $\text{CDCl}_3$ )  $\delta$  159.2, 153.8, 137.1, 136.2, 130.4, 128.8, 128.1, 127.7, 120.5, 114.2, 109.1, 102.4, 70.9, 70.3, 59.0, 50.5, 20.8; **IR** (NaCl, thin film,  $\text{cm}^{-1}$ ) 3065, 3033, 2970, 2930, 2873, 2107, 1618, 1502, 1285, 1264, 1179, 1164, 1116, 736, 696; **HRMS** (ESI-TOF)  $m/z$  calcd  $\text{C}_{19}\text{H}_{19}\text{N}_3\text{O}_2\text{Na}^+$  ( $\text{M}+\text{Na}$ )<sup>+</sup> 344.1369, found 344.1367.

**Note on solvent:** This procedure used anhydrous chloroform stabilized with amylene (50-150 ppm). Chloroform stabilized with ethanol gave inferior results as did chloroform which was stored under ambient conditions. For best results, the salts, substrates, and solvent were transferred in a glovebox, after which the vials were sealed and removed from the glovebox.

**Note:** Several minor modifications were made based on the substrate. The most common of these are to 1) heat the reaction to different temperature (40  $^\circ\text{C}$  – 60  $^\circ\text{C}$ ), 2) alter the catalyst loading catalyst loading (5% - 10%  $\text{AgSbF}_6$ ), or 3) simplify final purification via a short pass of silica instead of a flash column. These variations are noted for each substrate below.

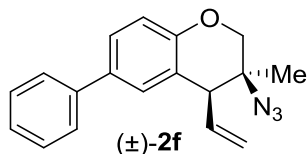

(±)-**2f**: A variation of general procedure 6 was used. The reaction was conducted at 0.10 M substrate and used 10% catalyst at 40 °C for 8 h. Purification was conducted by column chromatography (0 to 20% gradient, EtOAc in hexanes). This afforded compound **2f** as a white solid in 39% yield (200 mg, 59% brsm) with >25:1 dr, along with 34 % unreacted **1f**: **<sup>1</sup>H NMR** (500 MHz, CDCl<sub>3</sub>) δ 7.54 – 7.50 (m, 2H), 7.43 – 7.39 (m, 3H), 7.33 – 7.29 (m, 2H), 6.96 (d, *J* = 8.4 Hz, 1H), 5.88 (ddd, *J* = 17.1, 10.1, 8.9 Hz, 1H), 5.47 (dd, *J* = 10.1, 1.7 Hz, 1H), 5.33 (ddd, *J* = 17.1, 1.8, 0.8 Hz, 1H), 4.24 (d, *J* = 11.4 Hz, 1H), 3.96 (dd, *J* = 11.4, 0.9 Hz, 1H), 3.45 (br d, *J* = 8.9 Hz, 1H), 1.45 (s, 3H); **<sup>13</sup>C NMR** (126 MHz, CDCl<sub>3</sub>) δ 152.6, 141.0, 135.8, 134.6, 128.9, 128.5, 127.3, 127.0, 126.9, 122.0, 121.1, 117.0, 70.9, 59.0, 51.1, 20.9; **IR** (NaCl, thin film, cm<sup>-1</sup>) 3030, 2975, 2928, 2109, 1482, 1263, 1234, 1055, 762, 697; **HRMS** (ESI-TOF) *m/z* calcd for C<sub>18</sub>H<sub>17</sub>N<sub>3</sub>ONa<sup>+</sup> (M+Na)<sup>+</sup> 314.1264, found 314.1267.

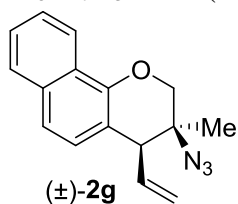

(±)-**2g**: A variation of general procedure 6 was used. The reaction was conducted at 0.10 M substrate and used 5% catalyst at 60 °C for 24 h. Purification was conducted by filtering through a short plug of silica (1:1 DCM:hexanes). This afforded compound **2g** (15 mg) as a white solid in 56% yield with >25:1 dr: **<sup>1</sup>H NMR** (500 MHz, CDCl<sub>3</sub>) δ 8.24 – 8.21 (m, 1H), 7.79 – 7.76 (m, 1H), 7.51 – 7.47 (m, 2H), 7.42 (d, *J* = 8.5 Hz, 1H), 7.18 (d, *J* = 8.5 Hz, 1H), 5.93 (ddd, *J* = 17.0, 10.0, 8.8 Hz, 1H), 5.44 (dd, *J* = 10.1, 1.8 Hz, 1H), 5.30 (dd, *J* = 17.1, 1.8 Hz, 1H), 4.35 (d, *J* = 11.2 Hz, 1H), 4.06 (dd, *J* = 11.1, 1.1 Hz, 1H), 3.53 (br d, *J* = 8.8 Hz, 1H), 1.48 (s, 3H); **<sup>13</sup>C NMR** (126 MHz, CDCl<sub>3</sub>) δ 148.1, 136.7, 133.7, 127.6, 127.2, 126.5, 125.7, 124.8, 122.0, 120.8, 120.4, 115.3, 70.5, 59.0, 50.9, 21.1; **IR** (NaCl, thin film, cm<sup>-1</sup>) 3055, 2975, 2930, 2877, 2108, 1575, 1506, 1403, 1380, 1355, 1279, 1106, 1087, 926, 812, 766, 662; **HRMS** (ESI-TOF) *m/z* calcd for C<sub>16</sub>H<sub>15</sub>N<sub>3</sub>ONa<sup>+</sup> (M+Na)<sup>+</sup> 288.1107, found 288.1099.

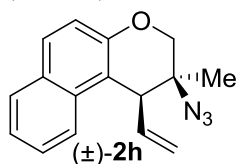

(±)-**2h**: A variation of general procedure 6 was used. The reaction was conducted at 0.10 M substrate and used 5% catalyst at 50 °C for 24 h. Purification was conducted by filtering through a short plug of silica (1:1 DCM:hexanes). This afforded compound **2h** as a white solid in 58% yield (15 mg) with a >25:1 dr. Compound **2h** was isolated as a single regioisomer: **<sup>1</sup>H NMR** (500 MHz, CDCl<sub>3</sub>) δ 7.81 (d, *J* = 8.9 Hz, 1H), 7.77 (d, *J* = 8.8 Hz, 1H), 7.70 (d, *J* = 8.9 Hz, 1H), 7.48 (ddd, *J* = 8.4, 6.8, 1.4 Hz, 1H), 7.39 – 7.34 (m, 1H), 7.08 (d, *J* = 8.9 Hz, 1H), 6.18 (ddd, *J* = 17.1, 10.3, 6.8 Hz, 1H), 5.33 (dt, *J* = 10.3, 1.1 Hz, 1H), 4.97 (dt, *J* = 17.1, 1.4 Hz, 1H), 4.15 (d, *J* = 10.4 Hz, 1H), 4.01 (br d, *J* = 6.8 Hz, 1H), 3.87 (dd, *J* = 10.4, 2.0 Hz, 1H), 1.52 (s, 3H); **<sup>13</sup>C NMR** (126 MHz, CDCl<sub>3</sub>) δ 150.4, 137.3, 132.9, 129.7, 129.6, 128.8, 126.8, 123.7, 122.8, 120.2, 118.5, 112.8, 67.4, 59.7, 46.1, 22.1; **IR** (NaCl, thin film, cm<sup>-1</sup>) 3063, 2974, 2885, 2099, 1623, 1600, 1514, 1472,

1434, 1403, 1258, 1230, 1075, 927, 812, 745; **HRMS** (ESI-TOF)  $m/z$  calcd for  $C_{16}H_{15}N_3ONa^+$  ( $M+Na$ )<sup>+</sup> 288.1107, found 288.1112.

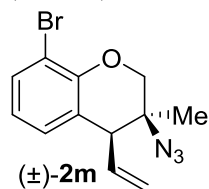

(±)-**2m**: A variation of general procedure 6 was used. The reaction was conducted at 0.10 M substrate and used 10% catalyst at 60 °C for 24 h. Purification was conducted by filtering through a short plug of silica (3:2 DCM:hexanes). This afforded compound **2m** as a white solid in 69% yield (20 mg) with a >25:1 dr: **<sup>1</sup>H NMR** (500 MHz,  $CDCl_3$ )  $\delta$  7.43 (dd,  $J = 7.9, 1.7$  Hz, 1H), 7.04 (dd,  $J = 7.7, 1.6$  Hz, 1H), 6.80 (t,  $J = 7.8$  Hz, 1H), 5.82 (ddd,  $J = 17.1, 10.1, 8.9$  Hz, 1H), 5.45 (dd,  $J = 10.1, 1.7$  Hz, 1H), 5.27 (ddd,  $J = 17.1, 1.7, 0.8$  Hz, 1H), 4.31 (d,  $J = 11.4$  Hz, 1H), 4.00 (dd,  $J = 11.4, 0.9$  Hz, 1H), 3.40 (dt,  $J = 8.9, 1.0$  Hz, 1H), 1.43 (s, 3H); **<sup>13</sup>C NMR** (126 MHz,  $CDCl_3$ )  $\delta$  149.7, 135.6, 132.2, 129.1, 123.5, 122.0, 121.2, 110.7, 71.3, 58.7, 51.0, 20.7; **IR** (NaCl, thin film,  $cm^{-1}$ ) 2977, 2930, 2875, 2109, 1467, 1443, 1280, 1240, 1070, 1044, 927, 770, 737; **HRMS** (ESI-TOF)  $m/z$  calcd for  $C_{12}H_{12}BrN_3ONa^+$  ( $M+Na$ )<sup>+</sup> 316.0056, found 316.0056.

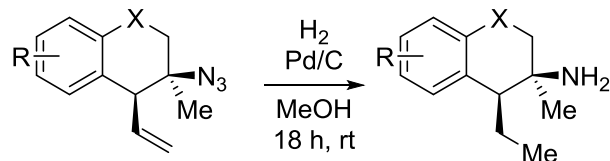

**General Procedure 7: Palladium Catalyzed Hydrogenation:** Example given for R = 6-OMe, X =  $CH_2$ . **Compound (±)-3a**: An oven dried 4 mL vial was charged with palladium on carbon (10 mg, 10 w % Pd) and sealed with a septa cap. The vial was then flushed with nitrogen gas (approx. 0.5 L) and charged with a solution of azide **2a**<sup>2</sup> (24 mg, 0.10 mmol) in MeOH (1 mL). The head space of the vial was then flushed with hydrogen gas (approx. 1 L). The vial was fitted with 2 balloons of hydrogen gas and stirred vigorously. After 18h, the reaction was diluted with MeOH and filtered through a short plug of silica gel. The filtrate was concentrated under reduced pressure to afford **3a** (14 mg, 0.7 mmol, 65%) as a clear oil. **Note:** Substrates **2a-c** and **2e**, were synthesized according to a previous publication. Characterization data for those compounds can be found in that paper.<sup>2</sup>

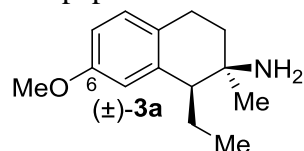

**<sup>1</sup>H NMR** (500 MHz,  $CDCl_3$ )  $\delta$  7.01 (d,  $J = 8.4$  Hz, 1H), 6.71 (dd,  $J = 8.3, 2.7$  Hz, 1H), 6.61 (d,  $J = 2.7$  Hz, 1H), 3.79 (s, 3H), 2.87 (ddd,  $J = 17.4, 7.8, 2.6$  Hz, 1H), 2.76 (ddd,  $J = 17.6, 10.4, 7.7$  Hz, 1H), 2.23 (dd,  $J = 9.4, 3.7$  Hz, 1H), 1.96 (dtd,  $J = 21.7, 7.8, 3.8$  Hz, 1H), 1.88 (ddd,  $J = 13.4, 10.7, 8.1$  Hz, 1H), 1.56 (dtd,  $J = 12.7, 7.9, 2.3$  Hz, 1H), 1.36 – 1.22 (m, 3H), 1.07 (s, 3H), 0.99 (t,  $J = 7.5$  Hz, 3H); **<sup>13</sup>C NMR** (126 MHz,  $CDCl_3$ )  $\delta$  157.0, 142.0, 129.8, 126.6, 115.4, 111.8, 55.4, 53.3, 51.2, 33.8, 28.6, 26.4, 25.1, 13.9; **IR** (NaCl, thin film,  $cm^{-1}$ ) 3359, 2954, 2929, 2871, 1609, 1502, 1257, 1156, 1043, 810; **HRMS** (ESI-TOF)  $m/z$  calcd for  $C_{14}H_{22}NO^+$  ( $M+H$ )<sup>+</sup> 220.1696, found 220.1693.

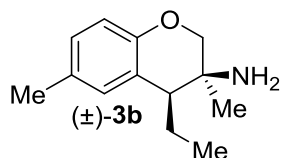

(±)-**3b**: Compound **2b**<sup>2</sup> was used as the starting material for this reaction. General procedure 7 was used and the product was isolated in 53% yield (11 mg) as a clear oil in 20:1 dr: **<sup>1</sup>H NMR** (500 MHz, CDCl<sub>3</sub>) δ 6.93 (dd, *J* = 8.2, 2.2 Hz, 1H), 6.89 (d, *J* = 2.2 Hz, 1H), 6.71 (d, *J* = 8.2 Hz, 1H), 3.89 (d, *J* = 10.4 Hz, 1H), 3.69 (d, *J* = 10.4 Hz, 1H), 2.36 (dd, *J* = 8.7, 4.0 Hz, 1H), 2.28 (s, 3H), 1.92 (dq, *J* = 15.0, 7.6, 4.0 Hz, 1H), 1.43 (dp, *J* = 14.9, 7.7 Hz, 1H), 1.20 (br s, 2H), 1.16 (s, 3H), 1.08 (t, *J* = 7.5 Hz, 3H); **<sup>13</sup>C NMR** (126 MHz, CDCl<sub>3</sub>) δ 150.4, 130.8, 129.2, 128.4, 125.2, 116.1, 73.3, 48.9, 48.1, 26.7, 25.0, 20.8, 14.0; **IR** (NaCl, thin film, cm<sup>-1</sup>) 3370, 2960, 2926, 2873, 1615, 1586, 1498, 1243, 1214, 1128, 1032, 813; **HRMS** (ESI-TOF) *m/z* calcd for C<sub>13</sub>H<sub>20</sub>NO<sup>+</sup> (M+H)<sup>+</sup> 206.1539, found 206.1538.

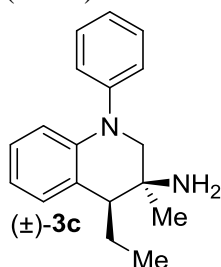

(±)-**3c**: Compound **2c**<sup>2</sup> was used as the starting material. General procedure 7 was used and the product was isolated in 95% yield (28 mg) as a white solid in 17:1 dr: **<sup>1</sup>H NMR** (400 MHz, CDCl<sub>3</sub>) δ 7.39 (t, *J* = 7.8 Hz, 2H), 7.31 – 7.23 (m, 2H), 7.15 (t, *J* = 7.3 Hz, 1H), 7.10 – 7.03 (m, 1H), 6.99 (td, *J* = 7.8, 1.7 Hz, 1H), 6.72 (d, *J* = 8.0 Hz, 2H), 3.51 (d, *J* = 11.1 Hz, 1H), 3.39 (dd, *J* = 11.1, 1.6 Hz, 1H), 2.39 (dd, *J* = 3.3, 1.5 Hz, 1H), 2.25 (br s, 2H), 1.95 (dq, *J* = 14.9, 7.6, 3.5 Hz, 1H), 1.45 – 1.31 (m, 1H), 1.23 (s, 3H), 1.05 (t, *J* = 7.4 Hz, 3H); **<sup>13</sup>C NMR** (126 MHz, CDCl<sub>3</sub>) δ 147.7, 141.9, 130.5, 129.7, 126.9, 126.8, 125.2, 124.3, 117.7, 115.2, 60.1, 51.4, 51.0, 28.3, 24.3, 13.2; **IR** (NaCl, thin film, cm<sup>-1</sup>) 3363, 3061, 3032, 2959, 2923, 2871, 1591, 1495, 1303, 1250, 747, 697; **HRMS** (ESI-TOF) *m/z* calcd for C<sub>18</sub>H<sub>23</sub>N<sub>2</sub><sup>+</sup> (M+H)<sup>+</sup> 267.1856, found 267.1850.

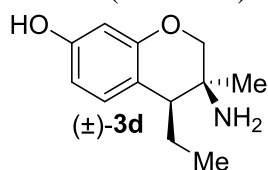

(±)-**3d**: General procedure 7 was used and the product was isolated in quantitative yield (11 mg) as a clear oil: **<sup>1</sup>H NMR** (500 MHz, CD<sub>3</sub>OD) δ 6.88 (d, *J* = 8.4 Hz, 1H), 6.33 (dd, *J* = 8.3, 2.5 Hz, 1H), 6.22 (d, *J* = 2.5 Hz, 1H), 3.92 (d, *J* = 10.5 Hz, 1H), 3.66 (dd, *J* = 10.5, 1.7 Hz, 1H), 2.30 (ddd, *J* = 9.3, 3.6, 1.4 Hz, 1H), 1.90 (dq, *J* = 15.0, 7.5, 3.9 Hz, 1H), 1.35 – 1.24 (m, 1H), 1.12 (s, 3H), 1.02 (t, *J* = 7.5 Hz, 3H); **<sup>13</sup>C NMR** (126 MHz, CD<sub>3</sub>OD) δ 156.7, 153.1, 130.8, 116.0, 107.2, 102.2, 71.4, 48.5, 47.1, 24.7, 24.6, 12.1; **IR** (NaCl, thin film cm<sup>-1</sup>) 3421, 2963, 2932, 1620, 1504, 1467, 1159, 1120, 633; **HRMS** (ESI-TOF) *m/z* calcd for C<sub>12</sub>H<sub>18</sub>NO<sub>2</sub><sup>+</sup> (M+H)<sup>+</sup> 208.1332, found 208.1331; calcd for C<sub>12</sub>H<sub>15</sub>O<sub>2</sub><sup>+</sup> (M-NH<sub>2</sub>)<sup>+</sup> 191.1067, found 191.1064.

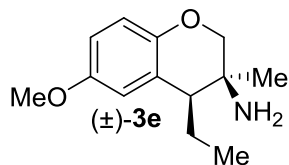

(±)-**3e**: Compound **2e**<sup>2</sup> was used as the starting material. General procedure 7 was used and the product was isolated in quantitative yield (25 mg) as a clear oil: <sup>1</sup>H NMR (400 MHz, CDCl<sub>3</sub>) δ 6.79 – 6.59 (m, 3H), 3.88 (d, *J* = 10.5 Hz, 1H), 3.76 (s, 3H), 3.68 (d, *J* = 10.4 Hz, 1H), 2.38 (dd, *J* = 8.5, 3.9 Hz, 1H), 1.93 (dq, *J* = 14.9, 7.6, 4.1 Hz, 1H), 1.53 – 1.39 (m, 3H), 1.17 (s, 3H), 1.09 (t, *J* = 7.5 Hz, 3H); <sup>13</sup>C NMR (101 MHz, CDCl<sub>3</sub>) δ 153.2, 146.7, 126.2, 116.8, 115.4, 113.3, 73.3, 55.9, 49.0, 48.2, 26.5, 24.8, 14.1; IR (NaCl, thin film, cm<sup>-1</sup>) 3369, 2960, 2874, 2832, 1496, 1209, 1050, 814; HRMS (ESI-TOF) *m/z* calcd for C<sub>13</sub>H<sub>20</sub>NO<sub>2</sub><sup>+</sup> (M+H)<sup>+</sup> 222.1489, found 222.1487; calcd for C<sub>13</sub>H<sub>17</sub>O<sub>2</sub><sup>+</sup> (M-NH<sub>2</sub>)<sup>+</sup> 205.1223, found 205.1227.

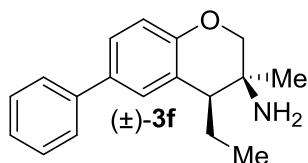

(±)-**3f**: General procedure 7 was used and the product was isolated in quantitative yield (28 mg) as a clear oil: <sup>1</sup>H NMR (400 MHz, CDCl<sub>3</sub>) δ 7.58 – 7.53 (m, 2H), 7.46 – 7.40 (m, 2H), 7.38 (dd, *J* = 8.4, 2.3 Hz, 1H), 7.35 – 7.28 (m, 2H), 6.90 (d, *J* = 8.4 Hz, 1H), 4.01 (d, *J* = 10.5 Hz, 1H), 3.79 (dd, *J* = 10.5, 1.5 Hz, 1H), 2.50 (dd, *J* = 8.8, 3.9 Hz, 1H), 2.18 (br s, 2H), 2.01 (dq, *J* = 18.9, 7.5, 3.5 Hz, 1H), 1.54 – 1.45 (m, 1H), 1.24 (s, 3H), 1.14 (t, *J* = 7.4 Hz, 3H); <sup>13</sup>C NMR (126 MHz, CDCl<sub>3</sub>) δ 152.3, 141.2, 133.3, 129.2, 128.9, 126.9, 126.7, 126.6, 125.4, 116.9, 72.8, 49.3, 48.1, 26.4, 24.9, 13.8; IR (NaCl, thin film, cm<sup>-1</sup>) 3367, 3030, 2962, 2930, 2874, 1613, 1483, 1232, 1130, 1019, 825, 763, 698; HRMS (ESI-TOF) *m/z* calcd for C<sub>18</sub>H<sub>22</sub>NO<sup>+</sup> (M+H)<sup>+</sup> 268.1696, found 268.1686; calcd for C<sub>18</sub>H<sub>19</sub>O<sup>+</sup> (M-NH<sub>2</sub>)<sup>+</sup> 251.1430, found 251.1431.

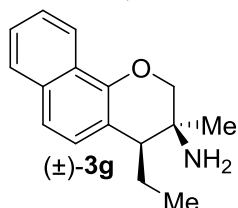

(±)-**3g**: General procedure 7 was used and the product was isolated in quantitative yield (17 mg) as a clear oil: <sup>1</sup>H NMR (500 MHz, CDCl<sub>3</sub>) δ 8.22 – 8.16 (m, 1H), 7.79 – 7.73 (m, 1H), 7.49 – 7.43 (m, 2H), 7.37 (d, *J* = 8.4 Hz, 1H), 7.21 (d, *J* = 8.5 Hz, 1H), 4.10 (d, *J* = 10.4 Hz, 1H), 3.93 (dd, *J* = 10.4, 1.7 Hz, 1H), 2.57 (ddd, *J* = 8.1, 4.4, 1.6 Hz, 1H), 2.01 (dq, *J* = 15.1, 7.5, 4.4 Hz, 1H), 1.74 (br s, 2H), 1.60 – 1.49 (m, 1H), 1.23 (s, 3H), 1.12 (t, *J* = 7.5 Hz, 3H); <sup>13</sup>C NMR (126 MHz, CDCl<sub>3</sub>) δ 147.5, 133.5, 128.6, 127.4, 126.0, 125.3, 125.0, 122.0, 119.5, 119.0, 73.2, 49.1, 48.0, 26.7, 25.7, 14.0; IR (NaCl, thin film, cm<sup>-1</sup>) 3369, 3053, 2961, 2930, 2874, 1575, 1401, 1378, 1107, 1092, 1011, 805, 746; HRMS (ESI-TOF) *m/z* calcd for C<sub>16</sub>H<sub>20</sub>NO<sup>+</sup> (M+H)<sup>+</sup> 242.1539, found 242.1543; calcd for C<sub>16</sub>H<sub>17</sub>O<sup>+</sup> (M-NH<sub>2</sub>)<sup>+</sup> 225.1274, found 225.1281.

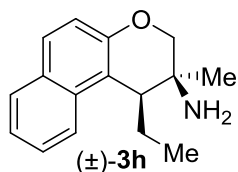



(±)-**3h**: General procedure 7 was used and the product was isolated in 91% yield (15 mg) as a clear oil:  $^1\text{H NMR}$  (500 MHz,  $\text{CDCl}_3$ )  $\delta$  7.85 (d,  $J = 8.5$  Hz, 1H), 7.78 (dd,  $J = 8.1, 1.3$  Hz, 1H), 7.63 (d,  $J = 8.9$  Hz, 1H), 7.50 (ddd,  $J = 8.4, 6.8, 1.4$  Hz, 1H), 7.35 (ddd,  $J = 8.0, 6.8, 1.1$  Hz, 1H), 7.04 (d,  $J = 8.9$  Hz, 1H), 4.07 (d,  $J = 10.4$  Hz, 1H), 3.77 (dd,  $J = 10.4, 1.9$  Hz, 1H), 3.03 (ddd,  $J = 6.5, 4.1, 1.9$  Hz, 1H), 1.84 (dp,  $J = 14.5, 7.3$  Hz, 1H), 1.69 (dq,  $J = 15.1, 7.7, 4.0$  Hz, 1H), 1.40 (br s, 2H), 1.19 (s, 3H), 1.17 (t,  $J = 7.5$  Hz, 3H);  $^{13}\text{C NMR}$  (126 MHz,  $\text{CDCl}_3$ )  $\delta$  149.5, 133.3, 129.6, 128.9, 128.3, 126.4, 123.2, 122.5, 118.7, 118.5, 71.7, 49.3, 44.2, 27.9, 27.5, 15.6; **IR** (NaCl, thin film,  $\text{cm}^{-1}$ ) 3370, 3055, 2959, 2928, 2874, 1622, 1599, 1514, 1472, 1401, 1229, 1082, 1026, 812, 748; **HRMS** (ESI-TOF)  $m/z$  calcd for  $\text{C}_{16}\text{H}_{20}\text{NO}^+$  ( $\text{M}+\text{H}$ ) $^+$  242.1539, found 242.1544; calcd for  $\text{C}_{16}\text{H}_{17}\text{O}^+$  ( $\text{M}-\text{NH}_2$ ) $^+$  225.1274, found 225.1273.

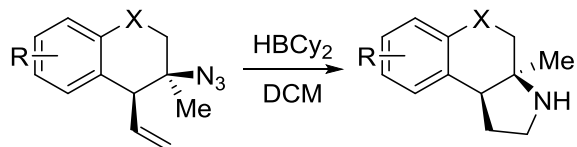

**General Procedure 8: Pyrrolidine Synthesis:** Example given for  $\text{R} = \text{H}$ ,  $\text{X} = \text{N-Ph}$ . **Compound 4c:** In a glovebox, a 4 mL vial was charged with  $\text{HBCy}_2$  (121 mg, 0.68 mmol). The vial was sealed with a septa cap and removed from the glovebox. The vial was then placed in an ice bath and charged with DCM (0.5 mL). A solution of azide **2c**<sup>2</sup> in DCM (104 mg, 0.34 mmol, 0.2 M) was added at 0 °C and a rinsed with additional DCM (0.2 mL). After 5 min, the ice bath was removed, and the solution was allowed to gradually warm to room temperature. After 18 h, the reaction was quenched by the addition of solid sodium fluoride (270 mg, 6.8 mmol) and DI water (61  $\mu\text{L}$ , 3.4 mmol). After 1 h, the solution was filtered through a short plug of silica gel rinsed (2%  $\text{NEt}_3$  in DCM) and the filtrate was concentrated under reduced pressure. Final purification by column chromatography (0 to 70% gradient, *i*-PrOH in 99:1 hexanes: $\text{NEt}_3$ ) afford pyrrolidine **4c** (72 mg, 0.26 mmol, 76%) as a clear oil. **Note:** Substrates **2c**, **2e**, **2j-l**, and **2n-o** were synthesized according to a previous publication. Characterization data for those compounds can be found in that paper.<sup>2</sup>

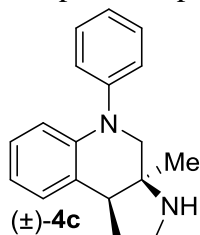

$^1\text{H NMR}$  (500 MHz,  $\text{CDCl}_3$ )  $\delta$  7.35 (t,  $J = 7.8$  Hz, 2H), 7.22 (d,  $J = 7.7$  Hz, 2H), 7.18 (dd,  $J = 7.5, 1.5$  Hz, 1H), 7.08 (td,  $J = 7.4, 1.1$  Hz, 1H), 6.97 (td,  $J = 7.7, 1.6$  Hz, 1H), 6.85 (d,  $J = 8.2$  Hz, 1H), 6.80 (t,  $J = 7.4$  Hz, 1H), 3.45 (d,  $J = 11.8$  Hz, 1H), 3.30 (d,  $J = 11.8$  Hz, 1H), 3.06 (dd,  $J = 8.2, 5.6$  Hz, 2H), 2.96 (t,  $J = 8.2$  Hz, 1H), 2.52 (ddt,  $J = 13.5, 8.1, 5.6$  Hz, 1H), 1.96 (br s, 1H), 1.88 (dq,  $J = 12.6, 8.2$  Hz, 1H), 1.26 (s, 3H);  $^{13}\text{C NMR}$  (126 MHz,  $\text{CDCl}_3$ )  $\delta$  147.6, 143.5, 130.5, 129.6, 128.6, 126.4, 123.8, 123.5, 119.5, 115.7, 60.2, 57.7, 48.0, 44.6, 37.6, 25.9; **IR** (NaCl, thin film,  $\text{cm}^{-1}$ ) 3330, 3030, 2958, 2923, 1592, 1572, 1495, 1460, 1447, 1366, 1250, 748, 698; **HRMS** (ESI-TOF)  $m/z$  calcd for  $\text{C}_{18}\text{H}_{21}\text{N}_2^+$  ( $\text{M}+\text{H}$ ) $^+$  265.1699, found 265.1700.

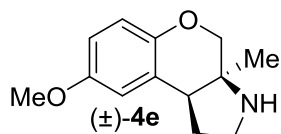

(±)-**4e**: Compound **2e**<sup>2</sup> was used as the starting material. General procedure 8 was used and the product was isolated in 81% yield (73 mg) as a yellow oil:  $^1\text{H NMR}$  (400 MHz,  $\text{CDCl}_3$ )  $\delta$  6.78 (d,

$J = 8.5$  Hz, 1H), 6.70 – 6.63 (m, 2H), 3.74 (d,  $J = 11.2$  Hz, 1H), 3.74 (s, 3H), 3.66 (d,  $J = 10.9$  Hz, 1H), 3.12 – 3.03 (m, 1H), 3.01 – 2.95 (m, 1H), 2.94 (br s, 1H), 2.87 (t,  $J = 7.7$  Hz, 1H), 2.52 – 2.40 (m, 1H), 1.85 (dq,  $J = 11.9, 7.6$  Hz, 1H), 1.22 (s, 3H);  $^{13}\text{C NMR}$  (101 MHz,  $\text{CDCl}_3$ )  $\delta$  154.2, 147.8, 126.9, 117.6, 114.5, 113.2, 71.6, 58.4, 55.7, 45.8, 44.6, 35.9, 24.2; **IR** (NaCl, thin film,  $\text{cm}^{-1}$ ) 3342, 2960, 2872, 2833, 1497, 1211, 1046, 817, 722; **HRMS** (ESI-TOF)  $m/z$  calcd for  $\text{C}_{13}\text{H}_{18}\text{NO}_2^+$  ( $\text{M}+\text{H}$ ) $^+$  220.1332, found 220.1332.

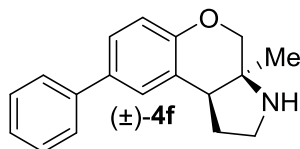

**(±)-4f:** General procedure 8 was used and the product was isolated in 76% yield (69 mg) as white solid:  $^1\text{H NMR}$  (500 MHz,  $\text{CDCl}_3$ )  $\delta$  7.59 – 7.53 (m, 2H), 7.46 – 7.41 (m, 2H), 7.40 – 7.36 (m, 2H), 7.33 (tt,  $J = 7.2, 1.4, 1.2$  Hz, 1H), 6.98 (d,  $J = 8.2$  Hz, 1H), 3.85 (d,  $J = 10.9$  Hz, 1H), 3.80 (dd,  $J = 10.7, 1.0$  Hz, 1H), 3.15 (dt,  $J = 10.7, 7.7$  Hz, 1H), 3.05 (ddd,  $J = 10.6, 8.0, 4.5$  Hz, 1H), 2.98 (br t,  $J = 7.9$  Hz, 1H), 2.76 (br s, 1H), 2.55 (dtd,  $J = 12.5, 7.8, 4.5$  Hz, 1H), 1.95 (dq,  $J = 13.0, 7.9$  Hz, 1H), 1.31 (s, 3H);  $^{13}\text{C NMR}$  (126 MHz,  $\text{CDCl}_3$ )  $\delta$  153.4, 141.0, 134.6, 128.84, 128.81, 126.84, 126.83, 126.3, 126.2, 117.4, 71.5, 58.2, 45.7, 44.6, 36.0, 24.2; **IR** (NaCl, thin film,  $\text{cm}^{-1}$ ) 3322, 3057, 3029, 2963, 2873, 1482, 1265, 1229, 1129, 1049, 1019, 826, 764, 732, 698; **HRMS** (ESI-TOF)  $m/z$  calcd for  $\text{C}_{18}\text{H}_{20}\text{NO}^+$  ( $\text{M}+\text{H}$ ) $^+$  266.1539, found 266.1533.

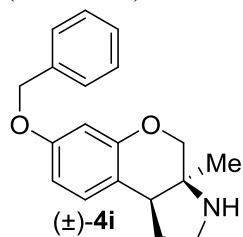

**(±)-4i:** General procedure 8 was used and the product was isolated in 74% yield (44 mg) as a clear oil:  $^1\text{H NMR}$  (500 MHz,  $\text{CDCl}_3$ )  $\delta$  7.46 – 7.42 (m, 2H), 7.39 (t,  $J = 7.5$  Hz, 2H), 7.36 – 7.31 (m, 1H), 7.05 (d,  $J = 8.5$  Hz, 1H), 6.63 (dd,  $J = 8.5, 2.6$  Hz, 1H), 6.53 (d,  $J = 2.6$  Hz, 1H), 5.02 (s, 2H), 3.78 (d,  $J = 10.9$  Hz, 1H), 3.73 (d,  $J = 10.9$  Hz, 1H), 3.10 (dt,  $J = 10.6, 7.6$  Hz, 1H), 2.99 (ddd,  $J = 10.6, 7.9, 4.6$  Hz, 1H), 2.85 (t,  $J = 7.7$  Hz, 1H), 2.45 (ddd,  $J = 15.8, 8.0, 3.8$  Hz, 1H), 2.40 (br s, 1H), 1.84 (dq,  $J = 12.8, 7.7$  Hz, 1H), 1.25 (s, 3H);  $^{13}\text{C NMR}$  (126 MHz,  $\text{CDCl}_3$ )  $\delta$  158.2, 154.5, 137.1, 130.7, 128.7, 128.0, 127.6, 118.4, 109.3, 102.7, 71.5, 70.2, 58.1, 45.0, 44.6, 35.9, 24.2; **IR** (NaCl, thin film,  $\text{cm}^{-1}$ ) 3374, 3063, 3031, 2963, 2872, 1618, 1582, 1503, 1454, 1379, 1266, 1161, 1127, 1105, 1037, 833, 735, 697; **HRMS** (ESI-TOF)  $m/z$  calcd for  $\text{C}_{19}\text{H}_{22}\text{NO}_2^+$  ( $\text{M}+\text{H}$ ) $^+$  296.1645, found 296.1644.

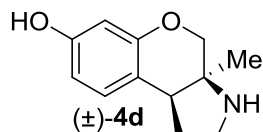

**(±)-4d:** Compound **4i** was used as the starting material. General procedure 7 was used and the product was isolated in quantitative yield (22 mg) as a clear oil:  $^1\text{H NMR}$  (500 MHz,  $\text{CD}_3\text{OD}$ )  $\delta$  7.01 (d,  $J = 8.3$  Hz, 1H), 6.46 (dd,  $J = 8.4, 2.4$  Hz, 1H), 6.31 (d,  $J = 2.4$  Hz, 1H), 3.92 (d,  $J = 11.4$  Hz, 1H), 3.78 (d,  $J = 11.3$  Hz, 1H), 3.19 (dt,  $J = 11.2, 7.2$  Hz, 1H), 3.04 (t,  $J = 6.8$  Hz, 1H), 3.02 – 2.97 (m, 1H), 2.56 (dq,  $J = 14.1, 7.3$  Hz, 1H), 1.94 – 1.86 (m, 1H), 1.34 (s, 3H);  $^{13}\text{C NMR}$  (126 MHz,  $\text{CD}_3\text{OD}$ )  $\delta$  156.7, 154.3, 130.0, 115.4, 109.6, 102.8, 69.3, 60.6, 44.2, 43.6, 34.3, 21.3; **IR**

(NaCl, thin film,  $\text{cm}^{-1}$ ) 3300, 2964, 1621, 1593, 1505, 1471, 1384, 1252, 1158, 1107, 1037, 843, 735; **HRMS** (ESI-TOF)  $m/z$  calcd for  $\text{C}_{12}\text{H}_{16}\text{NO}_2^+$  ( $\text{M}+\text{H}$ ) $^+$  206.1176, found 206.1171.

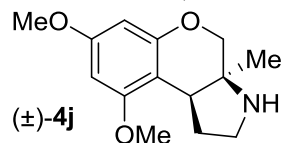

(±)-4j: Compound **2j**<sup>2</sup> was used as the starting material. General procedure 8 was used and the product was isolated in 50% yield (12 mg) as a yellow oil: **<sup>1</sup>H NMR** (500 MHz,  $\text{CDCl}_3$ )  $\delta$  6.10 (d,  $J = 2.4$  Hz, 1H), 6.08 (d,  $J = 2.4$  Hz, 1H), 3.80 (s, 3H), 3.76 (s, 3H), 3.71 (d,  $J = 10.6$  Hz, 1H), 3.67 (dd,  $J = 10.8, 1.2$  Hz, 1H), 3.11 (dt,  $J = 10.3, 7.7$  Hz, 1H), 2.98 (ddd,  $J = 10.5, 8.2, 3.7$  Hz, 1H), 2.80 (br t,  $J = 8.3$  Hz, 1H), 2.58 (dtd,  $J = 13.0, 7.6, 3.7$  Hz, 1H), 2.50 (br s, 1H), 1.66 (dq,  $J = 13.0, 8.5$  Hz, 1H), 1.23 (s, 3H); **<sup>13</sup>C NMR** (126 MHz,  $\text{CDCl}_3$ )  $\delta$  159.7, 159.6, 154.9, 107.4, 93.4, 92.2, 71.5, 57.2, 55.6, 55.5, 44.7, 41.6, 34.6, 24.1; **IR** (NaCl, thin film,  $\text{cm}^{-1}$ ) 3324, 2960, 1617, 1590, 1494, 1454, 1422, 1202, 1145, 1097, 1057, 813; **HRMS** (ESI-TOF)  $m/z$  calcd for  $\text{C}_{14}\text{H}_{20}\text{NO}_3^+$  ( $\text{M}+\text{H}$ ) $^+$  250.1438, found 250.1436.

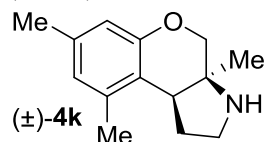

(±)-4k: Compound **2k**<sup>2</sup> was used as the starting material. General procedure 8 was used and the product was isolated in 35% yield (22 mg) as a yellow oil: **<sup>1</sup>H NMR** (500 MHz,  $\text{CDCl}_3$ )  $\delta$  6.64 (s, 1H), 6.58 (s, 1H), 3.76 (d,  $J = 10.7$  Hz, 1H), 3.65 (dd,  $J = 10.7, 1.2$  Hz, 1H), 3.12 (dt,  $J = 10.8, 8.0$  Hz, 1H), 3.04 (ddd,  $J = 10.7, 8.5, 3.9$  Hz, 1H), 2.79 (br t,  $J = 8.6$  Hz, 1H), 2.59 (dtd,  $J = 12.3, 8.1, 3.9$  Hz, 1H), 2.27 (s, 3H), 2.26 (s, 3H), 2.11 (br s, 1H), 1.68 (dq,  $J = 12.8, 8.5$  Hz, 1H), 1.24 (s, 3H); **<sup>13</sup>C NMR** (126 MHz,  $\text{CDCl}_3$ )  $\delta$  153.5, 138.1, 136.9, 124.2, 121.9, 115.2, 70.8, 58.2, 44.5, 44.4, 34.8, 24.0, 21.1, 19.5; **IR** (NaCl, thin film,  $\text{cm}^{-1}$ ) 3334, 2961, 2920, 2873, 1618, 1575, 1455, 1296, 1137, 1075, 840; **HRMS** (ESI-TOF)  $m/z$  calcd for  $\text{C}_{14}\text{H}_{20}\text{NO}^+$  ( $\text{M}+\text{H}$ ) $^+$  218.1539, found 218.1535.

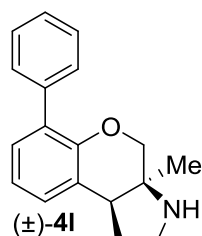

(±)-4l: Compound **2l**<sup>2</sup> was used as the starting material. General procedure 8 was used and the product was isolated in 57% yield (15 mg) as a yellow oil: **<sup>1</sup>H NMR** (500 MHz,  $\text{CDCl}_3$ )  $\delta$  7.58 – 7.52 (m, 2H), 7.42 (t,  $J = 7.7$  Hz, 2H), 7.33 (dt,  $J = 7.4, 1.4$  Hz, 1H), 7.19 (dd,  $J = 7.4, 1.7$  Hz, 1H), 7.16 (dd,  $J = 7.8, 1.7$  Hz, 1H), 7.01 (t,  $J = 7.5$  Hz, 1H), 3.77 (d, 11.1 Hz, 1H), 3.75 (d, 10.9 Hz, 1H), 3.12 (dt,  $J = 10.5, 7.7$  Hz, 1H), 3.04 (ddd,  $J = 10.6, 7.9, 4.3$  Hz, 1H), 2.98 (t,  $J = 8.0$  Hz, 1H), 2.55 (dtd,  $J = 12.3, 7.7, 4.3$  Hz, 1H), 1.93 (dq,  $J = 12.7, 8.0$  Hz, 1H), 1.90 (br s, 1H), 1.28 (s, 3H); **<sup>13</sup>C NMR** (126 MHz,  $\text{CDCl}_3$ )  $\delta$  151.0, 138.6, 130.5, 129.71, 129.70, 128.7, 128.2, 127.1, 127.1, 121.3, 71.9, 58.1, 46.2, 44.9, 36.7, 24.6; **IR** (NaCl, thin film,  $\text{cm}^{-1}$ ) 3319, 3056, 2961, 2923, 2871, 1586, 1465, 1429, 1213, 1072, 1024, 759, 698; **HRMS** (ESI-TOF)  $m/z$  calcd for  $\text{C}_{18}\text{H}_{20}\text{NO}^+$  ( $\text{M}+\text{H}$ ) $^+$  266.1539, found 266.1547.

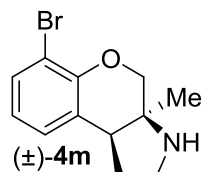

(±)-4m: General procedure 8 was used and the product was isolated in 55% yield (22 mg) as a clear oil: **<sup>1</sup>H NMR** (500 MHz, CDCl<sub>3</sub>) δ 7.37 (dd, *J* = 7.9, 1.6 Hz, 1H), 7.09 (dd, *J* = 7.7, 2.2 Hz, 1H), 6.80 (t, *J* = 7.8 Hz, 1H), 3.87 (d, *J* = 11.2 Hz, 1H), 3.84 (d, *J* = 10.9 Hz, 1H), 3.13 (dt, *J* = 10.6, 7.8 Hz, 1H), 3.02 (ddd, *J* = 10.6, 8.0, 4.4 Hz, 1H), 2.92 (t, *J* = 8.1 Hz, 1H), 2.51 (dtd, *J* = 12.4, 7.8, 4.3 Hz, 1H), 2.37 (br s, 1H), 1.86 (dq, *J* = 12.8, 8.0 Hz, 1H), 1.28 (s, 3H); **<sup>13</sup>C NMR** (126 MHz, CDCl<sub>3</sub>) δ 150.5, 131.1, 129.5, 127.8, 122.3, 111.2, 72.0, 58.2, 46.0, 44.6, 36.1, 24.2; **IR** (NaCl, thin film, cm<sup>-1</sup>) 3334, 2963, 2926, 2875, 1563, 1465, 1441, 1229, 1071, 1019, 771, 732; **HRMS** (ESI-TOF) *m/z* calcd for C<sub>12</sub>H<sub>15</sub>BrNO<sup>+</sup> (M+H)<sup>+</sup> 268.0332, found 268.0338.

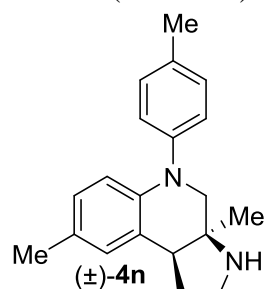

(±)-4n: Compound 2n<sup>2</sup> was used as the starting material. General procedure 8 was used and the product was isolated in 74% yield (22 mg) as a clear oil: **<sup>1</sup>H NMR** (500 MHz, CDCl<sub>3</sub>) δ 7.15 (d, *J* = 8.3 Hz, 2H), 7.09 (d, *J* = 8.3 Hz, 2H), 6.97 (d, *J* = 2.1 Hz, 1H), 6.78 (dd, *J* = 8.4, 2.1 Hz, 1H), 6.68 (d, *J* = 8.4 Hz, 1H), 3.96 (br s, 1H), 3.45 (d, *J* = 11.8 Hz, 1H), 3.30 (d, *J* = 11.7 Hz, 1H), 3.13 – 3.09 (m, 2H), 2.98 (br t, *J* = 8.1 Hz, 1H), 2.54 (dddd, *J* = 13.0, 8.2, 6.4, 5.2 Hz, 1H), 2.35 (s, 3H), 2.26 (s, 3H), 1.90 (dq, *J* = 12.8, 8.2 Hz, 1H), 1.31 (s, 3H); **<sup>13</sup>C NMR** (126 MHz, CDCl<sub>3</sub>) δ 145.0, 141.5, 133.3, 130.7, 130.2, 128.6, 127.4, 127.3, 123.0, 115.5, 60.9, 57.1, 47.7, 44.1, 37.0, 25.1, 21.0, 20.6; **IR** (NaCl, thin film, cm<sup>-1</sup>) 3351, 2921, 1609, 1502, 1259, 810; **HRMS** (ESI-TOF) *m/z* calcd for C<sub>20</sub>H<sub>25</sub>N<sub>2</sub><sup>+</sup> (M+H)<sup>+</sup> 293.2012, found 293.2011.

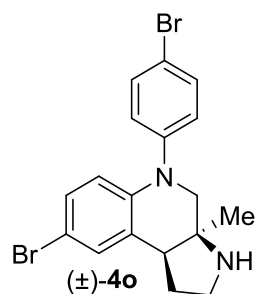

(±)-4o: Compound 2o<sup>2</sup> was used as the starting material. General procedure 8 was used and the product was isolated in 81% yield (81 mg) as a clear oil: **<sup>1</sup>H NMR** (500 MHz, CDCl<sub>3</sub>) δ 7.48 – 7.39 (m, 2H), 7.27 (d, *J* = 2.0 Hz, 1H), 7.09 – 7.03 (m, 3H), 6.70 (d, *J* = 8.8 Hz, 1H), 3.42 (d, *J* = 11.9 Hz, 1H), 3.27 (d, *J* = 11.9 Hz, 1H), 3.16 – 3.03 (m, 2H), 2.93 (br t, *J* = 8.4 Hz, 1H), 2.61 (br s, 1H), 2.57 – 2.45 (m, 1H), 1.86 (dq, *J* = 13.0, 8.4 Hz, 1H), 1.27 (s, 3H); **<sup>13</sup>C NMR** (126 MHz, CDCl<sub>3</sub>) δ 146.2, 141.9, 133.0, 132.8, 130.6, 129.6, 125.2, 117.6, 116.5, 112.0, 60.3, 57.2, 47.7, 44.3, 37.1, 25.4; **IR** (NaCl, thin film, cm<sup>-1</sup>) 3320, 2961, 2922, 1583, 1438, 1258, 1167, 1068, 812; **HRMS** (ESI-TOF) *m/z* calcd for C<sub>18</sub>H<sub>19</sub>Br<sub>2</sub>N<sub>2</sub><sup>+</sup> (M+H)<sup>+</sup> 420.9910, found 420.9899.

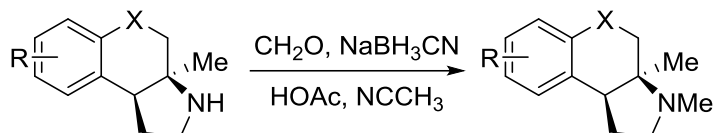

**General Procedure 9: Pyrrolidine N-Methylation:** Example given for R = H, X = N-Ph.  
**Compound 10c:** NaBH<sub>3</sub>CN (9.1 mg, 0.15 mmol) was added to a solution of amine **4c** (29 mg, 0.11 mmol) and CH<sub>2</sub>O (40 μL, 37% aq. solution) in acetonitrile (0.3 mL) in an ice bath. After 15 min, glacial acetic acid (4 μL, 70 μmol) was added. After an additional 15 min, the reaction was removed from the ice bath and allowed to warm to rt. After 18 h, the reaction mixture was directly purified by column chromatography (0 to 60 % gradient, *i*-PrOH in 99:1 hexanes:NEt<sub>3</sub>) afforded **10c** (27 mg, 0.10 mmol, 89%) as a clear oil.

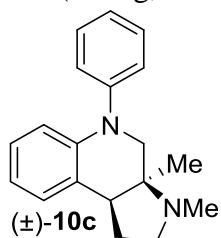

**<sup>1</sup>H NMR** (500 MHz, CDCl<sub>3</sub>) δ 7.38 – 7.32 (m, 2H), 7.25 – 7.21 (m, 2H), 7.16 (dd, *J* = 7.7, 1.6 Hz, 1H), 7.09 (tt, *J* = 7.3, 1.2 Hz, 1H), 6.96 (ddd, *J* = 8.5, 7.1, 1.6 Hz, 1H), 6.83 (dd, *J* = 8.4, 1.2 Hz, 1H), 6.79 (td, *J* = 7.4, 1.2 Hz, 1H), 3.40 (d, *J* = 11.6 Hz, 1H), 3.26 (dd, *J* = 11.6, 1.2 Hz, 1H), 3.02 – 2.96 (m, 2H), 2.87 (td, *J* = 9.1, 4.8 Hz, 1H), 2.49 (dddd, *J* = 12.6, 9.4, 7.9, 4.7 Hz, 1H), 2.40 (s, 3H), 1.83 (dtd, *J* = 12.7, 8.8, 6.5 Hz, 1H), 1.19 (s, 3H); **<sup>13</sup>C NMR** (126 MHz, CDCl<sub>3</sub>) δ 147.9, 143.1, 130.3, 129.5, 128.6, 126.4, 124.1, 123.5, 119.2, 115.5, 60.6, 52.8, 52.5, 48.0, 34.6, 32.9, 21.4; **IR** (NaCl, thin film, cm<sup>-1</sup>) 3029, 2961, 2933, 2893, 2778, 1592, 1495, 1367, 1266, 1212, 747, 699; **HRMS** (ESI-TOF) *m/z* calcd for C<sub>19</sub>H<sub>23</sub>N<sub>2</sub><sup>+</sup> (M+H)<sup>+</sup> 279.1856, found 279.1867.

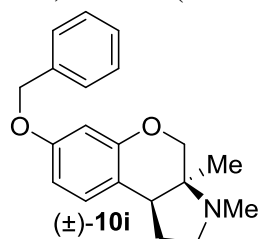

(±)-**10i:** General procedure 9 was used and the product was isolated in 72% yield (12 mg) as a clear oil: **<sup>1</sup>H NMR** (500 MHz, CDCl<sub>3</sub>) δ 7.43 (d, *J* = 7.2 Hz, 2H), 7.39 (t, *J* = 7.4 Hz, 2H), 7.35 – 7.30 (m, 1H), 7.02 (d, *J* = 8.5 Hz, 1H), 6.61 (dd, *J* = 8.4, 2.6 Hz, 1H), 6.52 (d, *J* = 2.5 Hz, 1H), 5.02 (s, 2H), 3.79 (d, *J* = 11.0 Hz, 1H), 3.73 (d, *J* = 10.9 Hz, 1H), 2.95 – 2.82 (m, 3H), 2.43 (s, 3H), 2.43 – 2.37 (m, 1H), 1.74 (dq, *J* = 12.8, 7.6 Hz, 1H), 1.12 (s, 3H); **<sup>13</sup>C NMR** (126 MHz, CDCl<sub>3</sub>) δ 158.2, 154.5, 137.3, 130.4, 128.7, 128.1, 127.6, 119.7, 109.3, 102.9, 70.3, 69.0, 59.3, 53.1, 45.3, 34.7, 32.3, 18.7; **IR** (NaCl, thin film, cm<sup>-1</sup>) 2962, 2931, 2783, 1618, 1583, 1503, 1454, 1266, 1163, 1036, 734, 696; **HRMS** (ESI-TOF) *m/z* calcd for C<sub>20</sub>H<sub>24</sub>NO<sub>2</sub><sup>+</sup> (M+H)<sup>+</sup> 310.1802, found 310.1804.

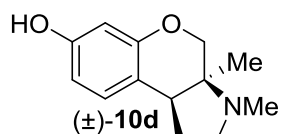

(±)-**10d:** **10i** was used as the starting material. General procedure 7 was used and the product was isolated in 77% yield (6.5 mg) as a clear oil: **<sup>1</sup>H NMR** (500 MHz, CD<sub>3</sub>OD) δ 6.94 (d, *J* = 8.2 Hz,

1H), 6.40 (dd,  $J = 8.3, 2.5$  Hz, 1H), 6.27 (d,  $J = 2.5$  Hz, 1H), 3.82 (d,  $J = 11.0$  Hz, 1H), 3.73 (dd,  $J = 11.0, 1.0$  Hz, 1H), 2.91 – 2.84 (m, 3H), 2.44 (ddt,  $J = 12.8, 9.4, 6.4$  Hz, 1H), 2.39 (s, 3H), 1.69 (dq,  $J = 12.7, 7.7$  Hz, 1H), 1.12 (s, 3H);  $^{13}\text{C}$  NMR (126 MHz,  $\text{CD}_3\text{OD}$ )  $\delta$  156.2, 154.1, 129.9, 117.8, 109.0, 102.7, 67.5, 59.4, 52.2, 44.7, 33.3, 31.6, 17.3; **IR** (NaCl, thin film,  $\text{cm}^{-1}$ ) 3402, 2963, 1620, 1594, 1507, 1469, 1244, 1156, 1122, 1038, 842; **HRMS** (ESI-TOF)  $m/z$  calcd for  $\text{C}_{13}\text{H}_{18}\text{NO}_2^+$  ( $\text{M}+\text{H}$ ) $^+$  220.1332, found 220.1328.

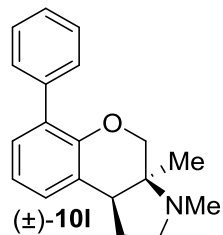

(±)-**10l**: General procedure 9 was used and the product was isolated in 70% yield (11 mg) as a clear oil:  $^1\text{H}$  NMR (500 MHz,  $\text{CDCl}_3$ )  $\delta$  7.58 – 7.53 (m, 2H), 7.44 – 7.38 (m, 2H), 7.33 (tt,  $J = 7.5, 1.4$  Hz, 1H), 7.18 (dd,  $J = 7.5, 1.8$  Hz, 1H), 7.14 (dd,  $J = 7.7, 1.7$  Hz, 1H), 7.00 (t,  $J = 7.5$  Hz, 1H), 3.78 (s, 2H), 3.01 (t,  $J = 8.7$  Hz, 1H), 2.97 – 2.90 (m, 2H), 2.49 (ddt,  $J = 12.5, 9.3, 5.9$  Hz, 1H), 2.45 (s, 3H), 1.84 (dq,  $J = 12.6, 7.9$  Hz, 1H), 1.18 (s, 3H);  $^{13}\text{C}$  NMR (126 MHz,  $\text{CDCl}_3$ )  $\delta$  151.0, 138.6, 130.5, 129.7, 129.3, 128.6, 128.1, 128.0, 127.1, 121.3, 69.3, 59.3, 53.1, 46.3, 34.8, 32.6, 19.4; **IR** (NaCl, thin film,  $\text{cm}^{-1}$ ) 3056, 2963, 2932, 2871, 1466, 1430, 1209, 1179, 1072, 1022, 759, 698; **HRMS** (ESI-TOF)  $m/z$  calcd for  $\text{C}_{19}\text{H}_{22}\text{NO}^+$  ( $\text{M}+\text{H}$ ) $^+$  280.1696, found 280.1694.

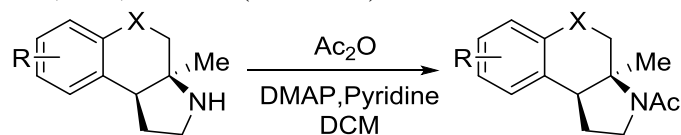

**General Procedure 10: Pyrrolidine N-Acetylation:** Example given for R = H, X = N-Ph.  
**Compound 11c:** To a solution of amine **4c** (29 mg, 0.11 mmol) in DCM (0.8 mL) was sequentially added DMAP (1.0 mg, 8  $\mu\text{mol}$ ) and pyridine (10  $\mu\text{L}$ , 0.12 mmol). The solution was cooled in an ice bath and  $\text{Ac}_2\text{O}$  (12  $\mu\text{L}$ , 0.12 mmol) was added. The ice bath was then removed, and the solution was allowed to warm to rt. After 18 h, the solution was purified directly by column chromatography (0 to 70% gradient, *i*-PrOH in hexanes) afforded amide **11c** (25 mg, 0.08 mmol, 73%) as a clear oil.

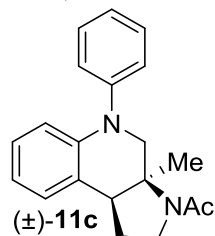

$^1\text{H}$  NMR (500 MHz,  $\text{CDCl}_3$ )  $\delta$  7.32 – 7.28 (m, 2H), 7.18 (dd,  $J = 7.7, 1.6$  Hz, 1H), 7.17 – 7.14 (m, 2H), 7.05 – 7.02 (m, 1H), 7.02 – 6.99 (m, 1H), 6.92 (dd,  $J = 8.4, 1.3$  Hz, 1H), 6.84 (td,  $J = 7.3, 1.3$  Hz, 1H), 3.92 (d,  $J = 12.2$  Hz, 1H), 3.87 (d,  $J = 12.2$  Hz, 1H), 3.50 – 3.44 (m, 2H), 3.12 (t,  $J = 7.4$  Hz, 1H), 2.44 (dtd,  $J = 12.2, 6.6, 5.3$  Hz, 1H), 1.96 – 1.87 (m, 1H), 1.90 (s, 3H), 1.54 (s, 3H);  $^{13}\text{C}$  NMR (126 MHz,  $\text{CDCl}_3$ )  $\delta$  169.5, 147.4, 143.8, 130.0, 129.4, 126.9, 126.5, 123.1, 123.0, 119.8, 117.1, 62.6, 52.7, 48.6, 47.5, 33.1, 24.2, 22.8; **IR** (NaCl, thin film,  $\text{cm}^{-1}$ ) 2967, 2929, 2869, 1644, 1496, 1408, 751; **HRMS** (ESI-TOF)  $m/z$  calcd for  $\text{C}_{20}\text{H}_{22}\text{N}_2\text{ONa}^+$  ( $\text{M}+\text{Na}$ ) $^+$  329.1624, found 329.1628.

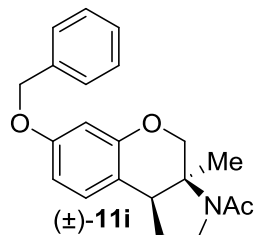

(±)-11i: General procedure 10 was used and the product was isolated in 75% yield (14 mg) as a clear oil:  $^1\text{H NMR}$  (500 MHz,  $\text{CDCl}_3$ )  $\delta$  7.43 (d,  $J = 7.0$  Hz, 2H), 7.39 (t,  $J = 7.4$  Hz, 2H), 7.36 – 7.31 (m, 1H), 7.04 (d,  $J = 8.4$  Hz, 1H), 6.63 (dd,  $J = 8.5, 2.6$  Hz, 1H), 6.53 (d,  $J = 2.6$  Hz, 1H), 5.02 (s, 2H), 4.34 (d,  $J = 10.8$  Hz, 1H), 4.19 (d,  $J = 10.8$  Hz, 1H), 3.50 (dt,  $J = 10.0, 6.8$  Hz, 1H), 3.37 (dt,  $J = 10.1, 6.6$  Hz, 1H), 3.02 (t,  $J = 6.7$  Hz, 1H), 2.39 (dq,  $J = 12.9, 6.5$  Hz, 1H), 2.06 (s, 3H), 1.84 (dq,  $J = 13.6, 6.9$  Hz, 1H), 1.53 (s, 3H);  $^{13}\text{C NMR}$  (101 MHz,  $\text{CDCl}_3$ )  $\delta$  169.8, 158.6, 155.6, 137.1, 130.1, 128.8, 128.1, 127.7, 116.0, 109.7, 102.6, 70.2, 67.8, 61.1, 47.7, 45.8, 31.9, 24.5, 21.2; **IR** (NaCl, thin film,  $\text{cm}^{-1}$ ) 2968, 2927, 2874, 1646, 1620, 1503, 1409, 1163, 738; **HRMS** (ESI-TOF)  $m/z$  calcd for  $\text{C}_{21}\text{H}_{23}\text{NO}_3\text{Na}^+$  ( $\text{M}+\text{Na}$ ) $^+$  360.1570, found 360.1576.

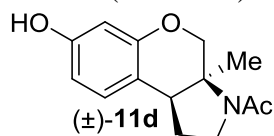

(±)-11d: 11i was used as the starting material. General procedure 7 was used and the product was isolated in 89% yield (8.9 mg) as a clear oil:  $^1\text{H NMR}$  (500 MHz,  $\text{CD}_3\text{OD}$ )  $\delta$  7.02 (d,  $J = 8.4$  Hz, 1H), 6.44 (dd,  $J = 8.3, 2.5$  Hz, 1H), 6.26 (d,  $J = 2.5$  Hz, 1H), 4.28 (d,  $J = 10.8$  Hz, 1H), 4.09 (d,  $J = 10.7$  Hz, 1H), 3.58 (dt,  $J = 10.1, 6.8$  Hz, 1H), 3.39 (dt,  $J = 10.2, 6.7$  Hz, 1H), 3.05 (t,  $J = 6.6$  Hz, 1H), 2.43 (dq,  $J = 13.0, 6.6$  Hz, 1H), 2.06 (s, 3H), 1.85 (dq,  $J = 12.4, 6.9$  Hz, 1H), 1.49 (s, 3H);  $^{13}\text{C NMR}$  (126 MHz,  $\text{CD}_3\text{OD}$ )  $\delta$  171.0, 156.7, 155.2, 129.8, 114.4, 109.3, 102.5, 66.8, 61.2, 47.3, 45.5, 31.3, 22.6, 19.7; **IR** (NaCl, thin film,  $\text{cm}^{-1}$ ) 3417, 2917, 1616, 1505, 1455, 1417, 1160, 1113, 1043, 848, 630; **HRMS** (ESI-TOF)  $m/z$  calcd for  $\text{C}_{14}\text{H}_{17}\text{NO}_3\text{Na}^+$  ( $\text{M}+\text{Na}$ ) $^+$  270.1101, found 270.1099.

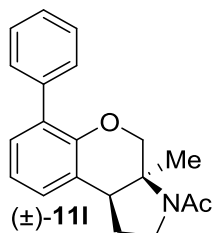

(±)-11l: General procedure 10 was used and the product was isolated in 96% yield (5.9 mg) as a clear oil:  $^1\text{H NMR}$  (500 MHz,  $\text{CDCl}_3$ )  $\delta$  7.57 – 7.51 (m, 2H), 7.41 (dd,  $J = 8.5, 6.9$  Hz, 2H), 7.33 (tt,  $J = 7.6, 1.4$  Hz, 1H), 7.23 (dd,  $J = 7.5, 1.7$  Hz, 1H), 7.15 (dd,  $J = 7.8, 1.7$  Hz, 1H), 7.02 (t,  $J = 7.5$  Hz, 1H), 4.28 (d,  $J = 10.8$  Hz, 1H), 4.21 (d,  $J = 10.7$  Hz, 1H), 3.55 (dt,  $J = 10.0, 7.1$  Hz, 1H), 3.46 (ddd,  $J = 10.0, 7.1, 5.3$  Hz, 1H), 3.14 (t,  $J = 7.2$  Hz, 1H), 2.51 – 2.44 (m, 1H), 2.07 (s, 3H), 1.94 (dq,  $J = 12.5, 7.5$  Hz, 1H), 1.58 (s, 3H);  $^{13}\text{C NMR}$  (126 MHz,  $\text{CDCl}_3$ )  $\delta$  169.8, 151.9, 138.2, 130.6, 129.7 (2C), 129.2, 128.9, 128.2 (2C), 127.2, 124.5, 121.4, 67.9, 61.0, 47.8, 46.8, 32.5, 24.5, 21.4; **IR** (NaCl, thin film,  $\text{cm}^{-1}$ ) 2968, 2929, 2873, 1645, 1429, 1409, 1216, 1029, 761, 698; **HRMS** (ESI-TOF)  $m/z$  calcd for  $\text{C}_{20}\text{H}_{21}\text{NO}_2\text{Na}^+$  ( $\text{M}+\text{Na}$ ) $^+$  330.1465, found 330.1463.

## References:

- (1) Kemsley, J. More Details on the University of Minnesota Explosion and Response <http://cenblog.org/the-safety-zone/2014/07/more-details-on-the-university-of-minnesota-explosion-and-response/>.
- (2) Porter, M. R.; Shaker, R. M.; Calcanas, C.; Topczewski, J. J. Stereoselective Dynamic Cyclization of Allylic Azides: Synthesis of Tetralins, Chromanes, and Tetrahydroquinolines. *J. Am. Chem. Soc.* **2018**, *140*, 1211–1214.
- (3) Besnard, J.; Ruda, G. F.; Setola, V.; Abecassis, K.; Rodriguiz, R. M.; Huang, X. P.; Norval, S.; Sassano, M. F.; Shin, A. I.; Webster, L. A.; et al. Automated Design of Ligands to Polypharmacological Profiles. *Nature* **2012**, *492*, 215–220.
- (4) Tan, E.; Ding, X.-Q.; Saadi, A.; Agarwal, N.; Naash, M. I.; Al-Ubaidi, M. R. Expression of Cone-Photoreceptor-Specific Antigens in a Cell Line Derived from Retinal Tumors in Transgenic Mice. *Investig. Ophthalmology Vis. Sci.* **2004**, *45* (3), 764.
- (5) Wang, X.; Ye, X.; Liu, R.; Chen, H.-L.; Bai, H.; Liang, X.; Zhang, X.-D.; Wang, Z.; Li, W.; Hai, C.-X. Antioxidant Activities of Oleanolic Acid in Vitro: Possible Role of Nrf2 and MAP Kinases. *Chem. Biol. Interact.* **2010**, *184* (3), 328–337.
- (6) Hanus, J.; Kolkin, A.; Chimienti, J.; Botsay, S.; Wang, S. 4-Acetoxyphenol Prevents RPE Oxidative Stress-Induced Necrosis by Functioning as an NRF2 Stabilizer. *Investig. Ophthalmology Vis. Sci.* **2015**, *56* (9), 5048.
- (7) Wang, J.; Zhao, J.; Cui, X.; Mysona, B. A.; Navneet, S.; Saul, A.; Ahuja, M.; Lambert, N.; Gazaryan, I. G.; Thomas, B.; et al. The Molecular Chaperone Sigma 1 Receptor Mediates Rescue of Retinal Cone Photoreceptor Cells via Modulation of NRF2. *Free Radic. Biol. Med.* **2019**, *134*, 604–616.



### **p*K*<sub>i</sub> Determination:**

Compound p*K*<sub>i</sub> were determined by the Psychoactive Drug Screening Program (PDSP) using the following method: The *IC*<sub>50</sub> was first determined using the equation

$$Y = Bottom + \frac{(Top - Bottom)}{1 + 10^{X - \log(IC_{50})}}$$

where *Y* is the total binding in the presence of the test compound *X*. *Top* and *Bottom* are the total and nonspecific binding in the absence and presence of 10 μM reference antagonist. *IC*<sub>50</sub> is the concentration at which 50% observed binding of the displaced radioligand was observed. The *IC*<sub>50</sub> was converted to *K*<sub>i</sub> according to the Cheng-Prusoff equation:

$$K_i = \frac{IC_{50}}{1 + \frac{L}{K_d}}$$

where *L* is the radioligand concentration used in the competition binding assay and *K*<sub>d</sub> is the radioligand equilibrium binding affinity determined during saturation binding assays. *Top* and *Bottom* values are shared among all binding curves from the same plate if necessary.

p*K*<sub>i</sub> errors were determined as follows: For p*K*<sub>i</sub> values determined from triplicate measurements of a single experiment, the error reflects the error in the sigmoidal curve fit. For p*K*<sub>i</sub> values determined from the average of duplicate experiments run in triplicate, the error reflects one half the difference between the two calculated p*K*<sub>i</sub> values. For p*K*<sub>i</sub> values determined from the average of triplicate experiments run in triplicate, the error reflects the standard deviation of the three calculated p*K*<sub>i</sub> values.

For more details on the fitting process please reference the PDSP assay protocol book at: <https://pdspdb.unc.edu/pdspWeb/content/UNC-CH%20Protocol%20Book.pdf>

Compound ( $\pm$ )-**3a**, PDSP ID 52292, 5-HT<sub>2B</sub> receptor:

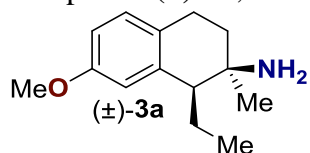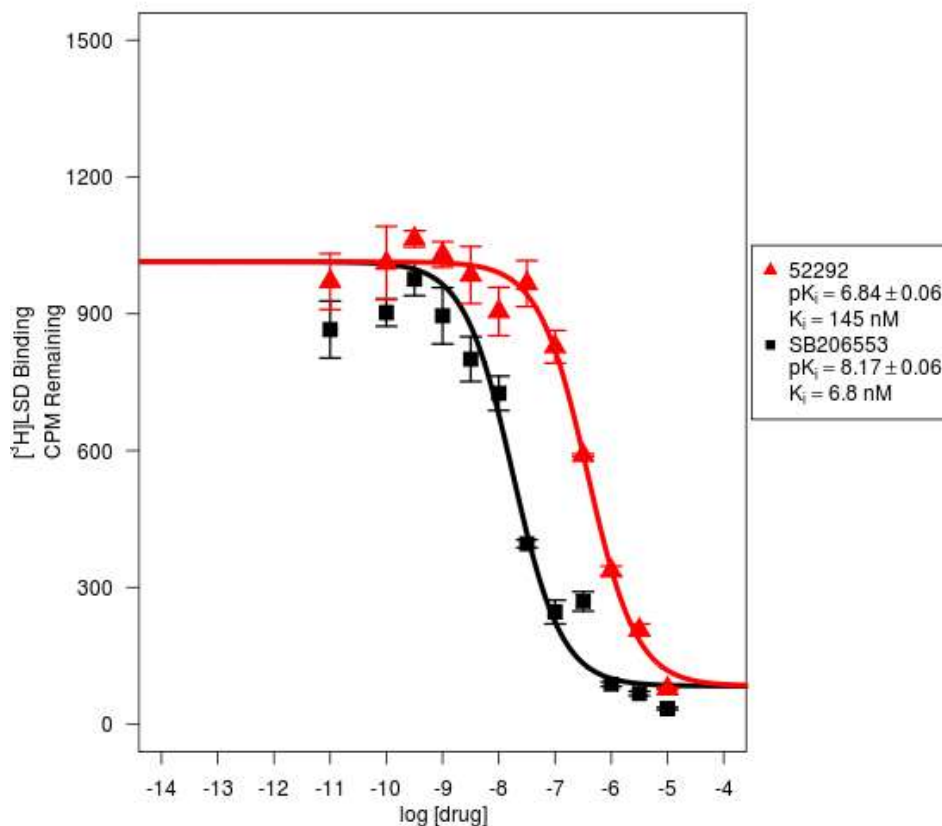

| Compound: <b>3a</b> |                    |      | pK <sub>i</sub> |                |      | ± pK <sub>i</sub> |     |     | K <sub>i</sub> (nM) |  |  |
|---------------------|--------------------|------|-----------------|----------------|------|-------------------|-----|-----|---------------------|--|--|
| PDSP ID:            | 52292              |      | <b>3a</b>       | 6.84           |      | ±0.06             |     | 145 |                     |  |  |
| Receptor            | 5-HT <sub>2B</sub> |      | SB206553        | 8.17           |      |                   |     |     |                     |  |  |
| log[ <b>3a</b> ]    | 1                  | 2    | 3               | log[SB 206553] | 1    | 2                 | 3   |     |                     |  |  |
| -11                 | 1122               | 1082 | 1022            | -11            | 928  | 803               | 757 |     |                     |  |  |
| -10                 | 944                | 981  | 855             | -10            | 961  | 862               | 885 |     |                     |  |  |
| -9.5                | 1174               | 1140 | 1049            | -9.5           | 1024 | 905               | 999 |     |                     |  |  |
| -9                  | 955                | 792  | 793             | -9             | 961  | 772               | 954 |     |                     |  |  |
| -8.5                | 982                | 1099 | 1002            | -8.5           | 811  | 711               | 880 |     |                     |  |  |
| -8                  | 962                | 1056 | 1140            | -8             | 801  | 688               | 688 |     |                     |  |  |
| -7.5                | 1118               | 904  | 1069            | -7.5           | 413  | 388               | 386 |     |                     |  |  |
| -7                  | 836                | 782  | 855             | -7             | 620  | 272               | 220 |     |                     |  |  |
| -6.5                | 600                | 619  | 603             | -6.5           | 299  | 228               | 281 |     |                     |  |  |
| -6                  | 358                | 387  | 376             | -6             | 81   | 97                | 85  |     |                     |  |  |
| -5.5                | 209                | 202  | 238             | -5.5           | 70   | 58                | 74  |     |                     |  |  |
| -5                  | 428                | 259  | 338             | -5             | 38   | 36                | 29  |     |                     |  |  |

Compound ( $\pm$ )-**3a**, PDSP ID 52292,  $\kappa$ -opioid receptor:

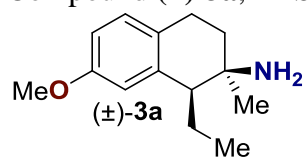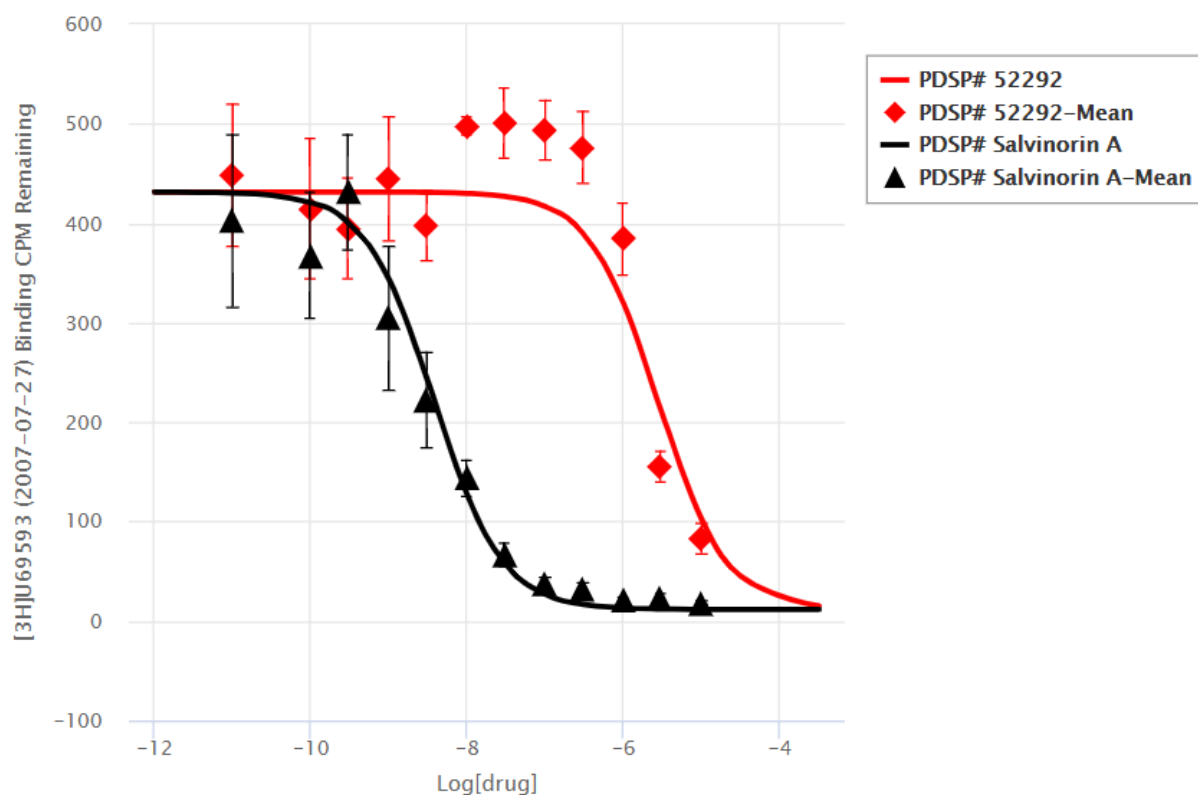

PDSP IMS

| Compound: <b>3a</b> |       |                |     | PDSP IMS            |            |            |     |
|---------------------|-------|----------------|-----|---------------------|------------|------------|-----|
| PDSP ID:            | 52292 | <b>3a</b>      |     | $pK_i$              | $\pm pK_i$ | $K_i$ (nM) |     |
| Receptor            | K-OR  | Salvinatorin A |     | 6.5                 | $\pm 0.1$  | 350        |     |
| log[ <b>3a</b> ]    | 1     | 2              | 3   | log[Salvinatorin A] | 1          | 2          | 3   |
| -11                 | 294   | 451            | 599 | -11                 | 567        | 437        | 203 |
| -10                 | 256   | 435            | 552 | -10                 | 502        | 367        | 232 |
| -9.52               | 273   | 466            | 445 | -9.52               | 499        | 504        | 290 |
| -9                  | 331   | 410            | 591 | -9                  | 444        | 330        | 139 |
| -8.52               | 472   | 400            | 321 | -8.52               | 338        | 169        | 157 |
| -8                  | 480   | 493            | 520 | -8                  | 187        | 111        | 133 |
| -7.52               | 537   | 551            | 413 | -7.52               | 95         | 45         | 61  |
| -7                  | 449   | 465            | 567 | -7                  | 37         | 26         | 50  |
| -6.52               | 416   | 450            | 562 | -6.52               | 47         | 26         | 22  |
| -6                  | 429   | 296            | 428 | -6                  | 27         | 21         | 17  |
| -5.52               | 134   | 138            | 194 | -5.52               | 26         | 11         | 31  |
| -5                  | 77    | 53             | 117 | -5                  | 20         | 13         | 21  |

Compound ( $\pm$ )-**3a**, PDSP ID 52292,  $\sigma_1$  receptor:

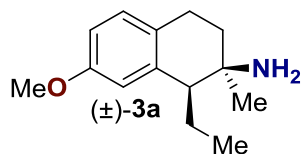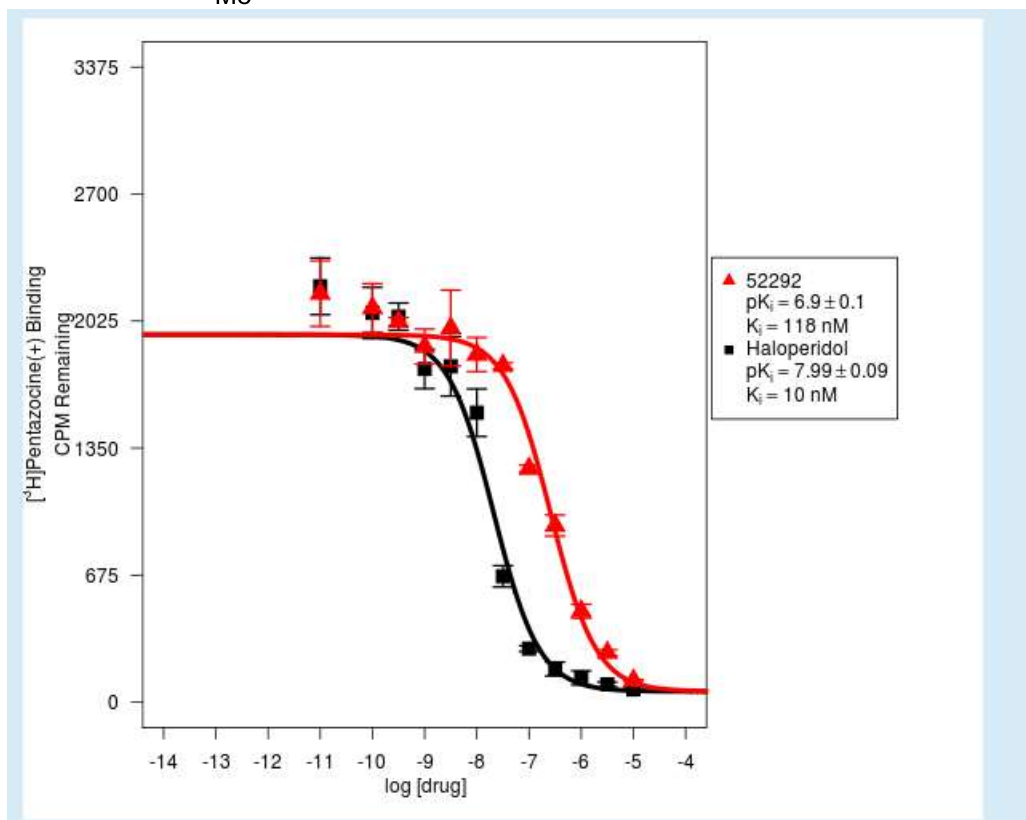

| Compound: <b>3a</b> |             |      |      | $pK_i$           | $\pm pK_i$ | $K_i$ (nM) |      |
|---------------------|-------------|------|------|------------------|------------|------------|------|
| PDSP ID: 52292      | <b>3a</b>   |      |      | 6.9              | $\pm 0.1$  | 120        |      |
| Receptor $\sigma_1$ | Haloperidol |      |      | 7.99             |            |            |      |
| log[ <b>3a</b> ]    | 1           | 2    | 3    | log[Haloperidol] | 1          | 2          | 3    |
| -11                 | 2512        | 2068 | 1934 | -11              | 2313       | 1913       | 2404 |
| -10                 | 2352        | 1975 | 1957 | -10              | 2063       | 1835       | 2307 |
| -9.5                | 2023        | 2059 | 1981 | -9.5             | 2054       | 1921       | 2171 |
| -9                  | 2049        | 1893 | 1726 | -9               | 1824       | 1569       | 1919 |
| -8.5                | 2204        | 2174 | 1585 | -8.5             | 1835       | 1489       | 2030 |
| -8                  | 1787        | 2025 | 1729 | -8               | 1593       | 1297       | 1724 |
| -7.5                | 1772        | 1818 | 1773 | -7.5             | 773        | 579        | 653  |
| -7                  | 1272        | 1243 | 1208 | -7               | 274        | 264        | 314  |
| -6.5                | 1045        | 855  | 914  | -6.5             | 132        | 146        | 249  |
| -6                  | 527         | 409  | 512  | -6               | 80         | 103        | 203  |
| -5.5                | 285         | 232  | 270  | -5.5             | 80         | 82         | 119  |
| -5                  | 125         | 107  | 111  | -5               | 62         | 58         | 81   |

Compound ( $\pm$ )-**3b**, PDSP ID 52291, 5-HT<sub>2B</sub> receptor:

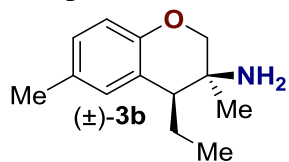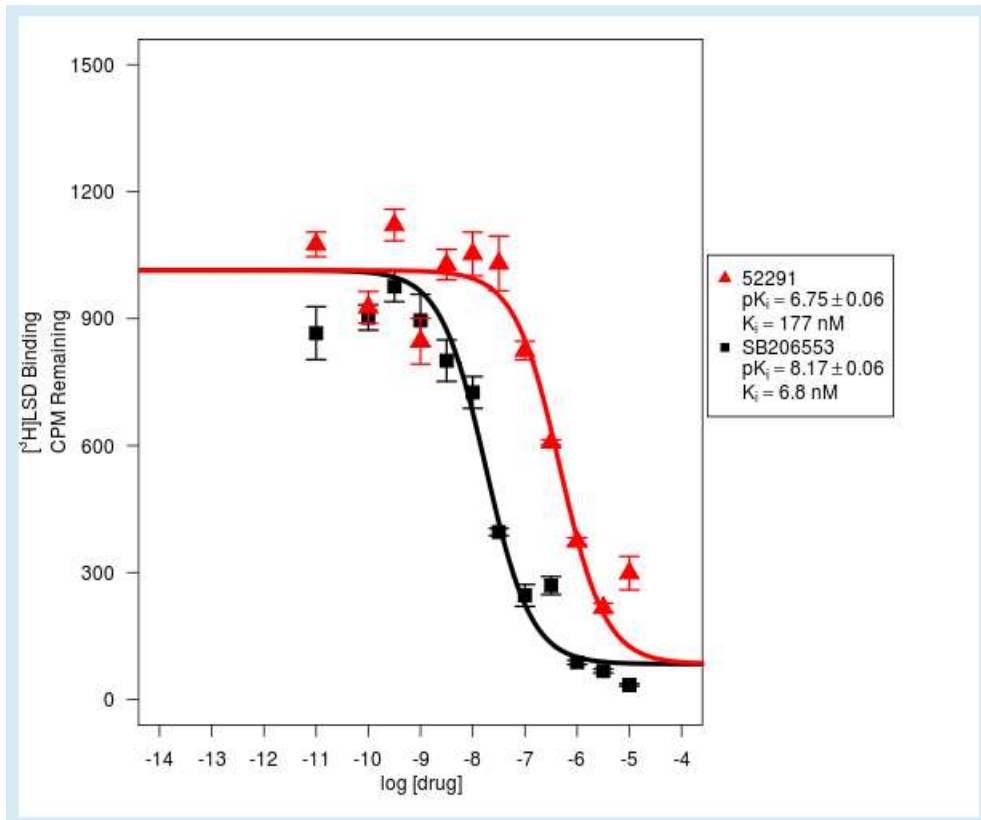

| Compound: <b>3b</b> |                    |      |      | $pK_i$         | $\pm pK_i$ | $K_i$ (nM) |     |
|---------------------|--------------------|------|------|----------------|------------|------------|-----|
| PDSP ID:            | 52291              |      |      | <b>3b</b>      | 6.75       | $\pm 0.06$ | 177 |
| Receptor            | 5-HT <sub>2B</sub> |      |      | SB 206553      | 8.17       |            |     |
| log[ <b>3b</b> ]    | 1                  | 2    | 3    | log[SB 206553] | 1          | 2          | 3   |
| -11                 | 1122               | 1082 | 1022 | -11            | 928        | 803        | 757 |
| -10                 | 944                | 981  | 855  | -10            | 961        | 862        | 885 |
| -9.5                | 1174               | 1140 | 1049 | -9.5           | 1024       | 905        | 999 |
| -9                  | 955                | 792  | 793  | -9             | 961        | 772        | 954 |
| -8.5                | 982                | 1099 | 1002 | -8.5           | 811        | 711        | 880 |
| -8                  | 962                | 1056 | 1140 | -8             | 801        | 688        | 688 |
| -7.5                | 1118               | 904  | 1069 | -7.5           | 413        | 388        | 386 |
| -7                  | 836                | 782  | 855  | -7             | 620        | 272        | 220 |
| -6.5                | 600                | 619  | 603  | -6.5           | 299        | 228        | 281 |
| -6                  | 358                | 387  | 376  | -6             | 81         | 97         | 85  |
| -5.5                | 209                | 202  | 238  | -5.5           | 70         | 58         | 74  |
| -5                  | 428                | 259  | 338  | -5             | 38         | 36         | 29  |

Compound ( $\pm$ )-**3c**, PDSP ID 52290, 5-HT<sub>1</sub> receptor:

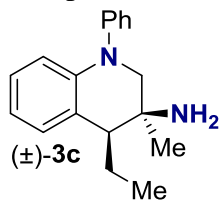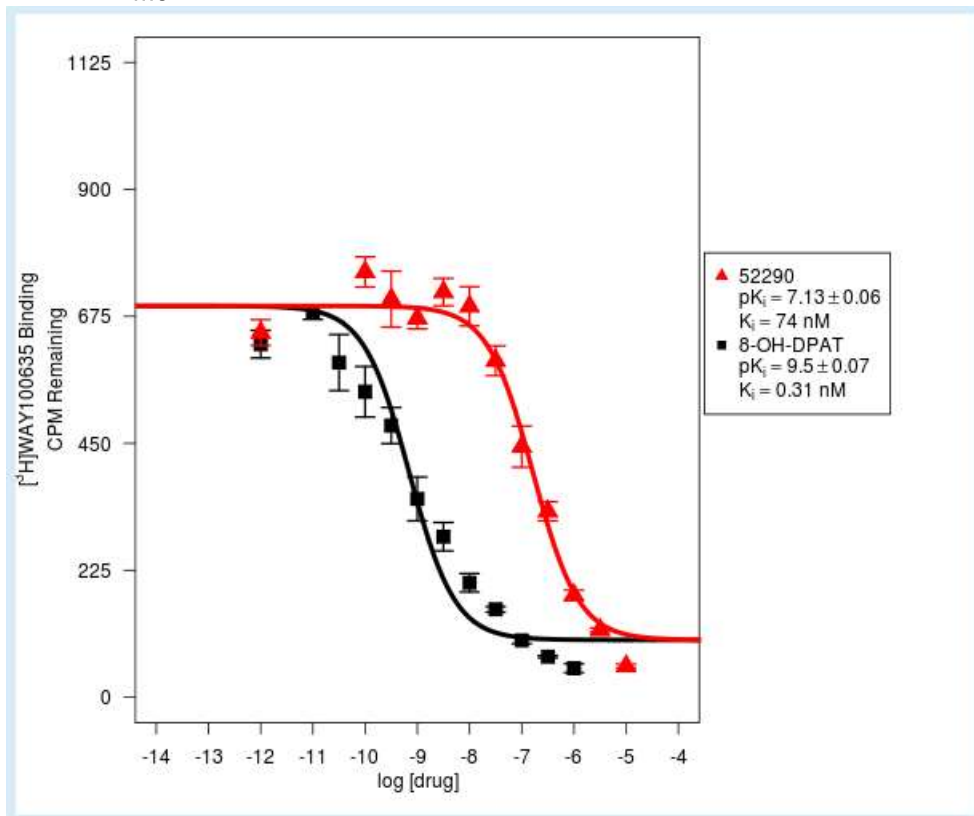

Compound: **3c**

PDSP ID: 52290

Receptor 5-HT<sub>1</sub>

log[**3c**]

|      | 1   | 2   | 3   |
|------|-----|-----|-----|
| -12  | 684 | 605 | 650 |
| -10  | 788 | 772 | 701 |
| -9.5 | 755 | 656 | 435 |
| -9   | 647 | 659 | 709 |
| -8.5 | 711 | 680 | 763 |
| -8   | 762 | 656 | 660 |
| -7.5 | 598 | 550 | 641 |
| -7   | 479 | 371 | 482 |
| -6.5 | 354 | 297 | 337 |
| -6   | 197 | 166 | 179 |
| -5.5 | 123 | 112 | 122 |
| -5   | 61  | 55  | 49  |

**3c**

8-OH-DPAT

log[8-OH-DPAT]

|       | 1   | 2   | 3   |
|-------|-----|-----|-----|
| -12   | 674 | 609 | 594 |
| -11   | 693 | 697 | 657 |
| -10.5 | 681 | 509 | 589 |
| -10   | 620 | 539 | 465 |
| -9.5  | 505 | 521 | 418 |
| -9    | 415 | 358 | 281 |
| -8.5  | 310 | 309 | 234 |
| -8    | 220 | 218 | 170 |
| -7.5  | 165 | 153 | 149 |
| -7    | 112 | 98  | 92  |
| -6.5  | 68  | 75  | 72  |
| -6    | 53  | 64  | 37  |

pK<sub>i</sub>

± pK<sub>i</sub>

K<sub>i</sub> (nM)

7.13 ± 0.1 74

9.5

Compound ( $\pm$ )-**3f**, PDSP ID 53549,  $\sigma_1$  receptor:

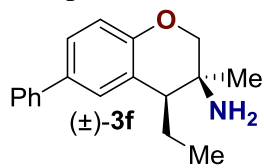

Triplicate trials:  $pK_i = 8.1$  (shown), 7.7, 7.8; average 7.9 reported.

### Secondary Binding

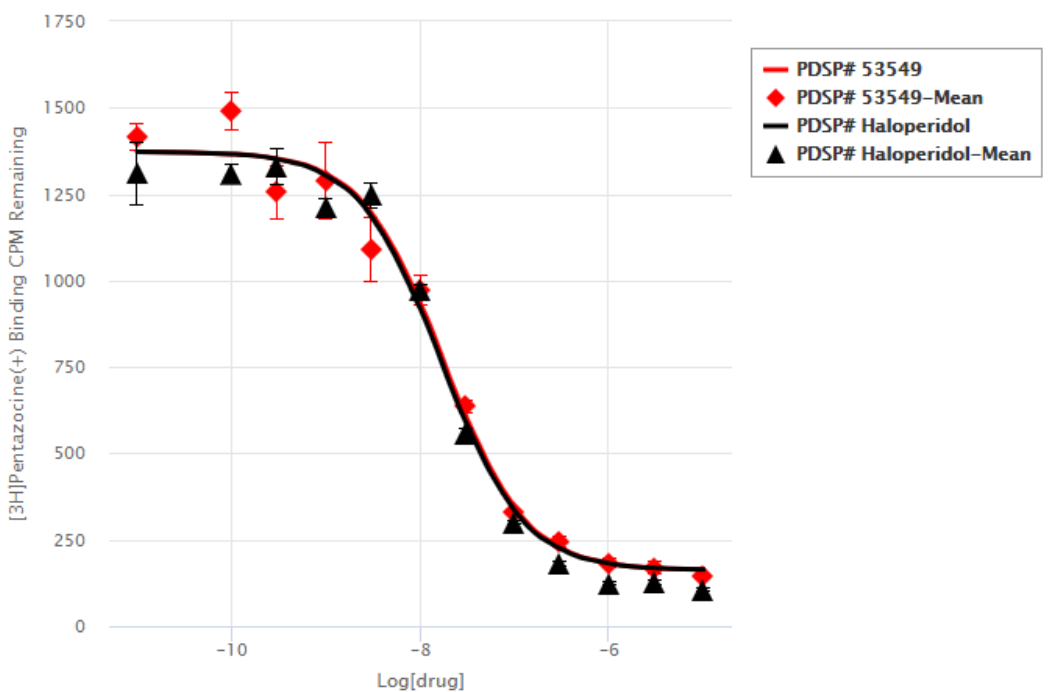

PDSP IMS

| Compound:        | <b>3f</b>  |      |      | Haloperidol      |      |      | $pK_i$ | $\pm pK_i$ | $K_i$<br>(nM) |
|------------------|------------|------|------|------------------|------|------|--------|------------|---------------|
| PDSP ID:         | 53549      |      |      | <b>3f</b>        |      |      | 8.1    | $\pm 0.2$  | 7.5           |
| Receptor:        | $\sigma_1$ |      |      | Haloperidol      |      |      | 8.1    |            |               |
| log[ <b>3f</b> ] | 1          | 2    | 3    | log[Haloperidol] | 1    | 2    | 3      |            |               |
| -11              | 1364       | 1372 | 1512 | -11              | 1089 | 1460 | 1380   |            |               |
| -10              | 1485       | 1608 | 1378 | -10              | 1276 | 1374 | 1275   |            |               |
| -9.52            | 1392       | 1303 | 1072 | -9.52            | 1211 | 1427 | 1349   |            |               |
| -9               | 1393       | 1456 | 1022 | -9               | 1150 | 1237 | 1251   |            |               |
| -8.52            | 974        | 1318 | 980  | -8.52            | 1167 | 1326 | 1246   |            |               |
| -8               | 873        | 1036 | 1009 | -8               | 942  | 965  | 1009   |            |               |
| -7.52            | 653        | 593  | 664  | -7.52            | 591  | 550  | 525    |            |               |
| -7               | 313        | 331  | 341  | -7               | 309  | 300  | 290    |            |               |
| -6.52            | 282        | 219  | 230  | -6.52            | 193  | 173  | 175    |            |               |
| -6               | 194        | 149  | 202  | -6               | 137  | 114  | 119    |            |               |
| -5.52            | 166        | 134  | 207  | -5.52            | 131  | 134  | 115    |            |               |
| -5               | 158        | 143  | 129  | -5               | 94   | 110  | 112    |            |               |

Compound ( $\pm$ )-**3g**, PDSP ID 53529, 5-HT<sub>2B</sub> receptor:

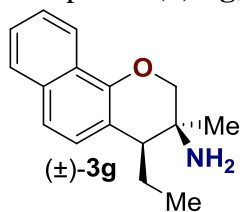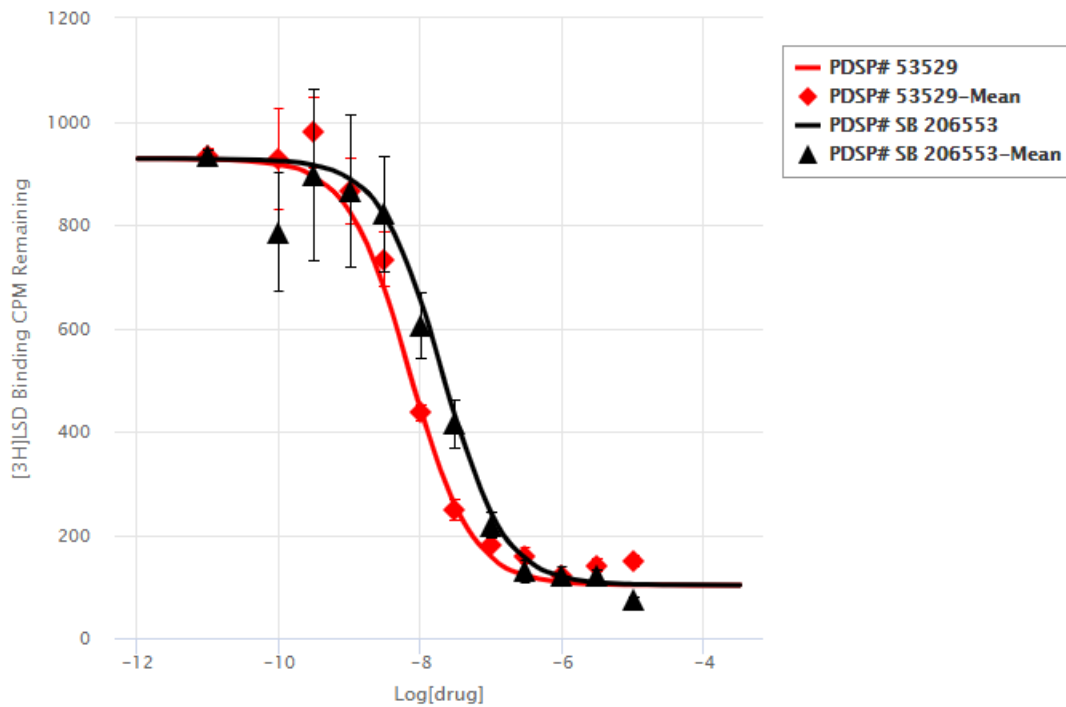

Compound: **3g**

PDSP ID: 53529

Receptor 5-HT<sub>2B</sub>

log[3g]

|       | 1    | 2   | 3   |
|-------|------|-----|-----|
| -11   | 922  | 966 | 914 |
| -10   | 1161 | 848 | 774 |
| -9.52 | 1135 | 941 | 859 |
| -9    | 1021 | 792 | 781 |
| -8.52 | 844  | 732 | 622 |
| -8    | 426  | 474 | 409 |
| -7.52 | 212  | 298 | 235 |
| -7    | 190  | 179 | 166 |
| -6.52 | 195  | 148 | 135 |
| -6    | 139  | 122 | 100 |
| -5.52 | 171  | 132 | 120 |
| -5    | 120  | 162 | 163 |

**3g**

SB 206553

log[SB 206553]

|       | 1    | 2   | 3   |
|-------|------|-----|-----|
| -11   | 960  | 934 | 902 |
| -10   | 1030 | 788 | 539 |
| -9.52 | 1279 | 815 | 592 |
| -9    | 1188 | 841 | 565 |
| -8.52 | 1072 | 792 | 598 |
| -8    | 748  | 586 | 478 |
| -7.52 | 524  | 389 | 330 |
| -7    | 279  | 179 | 196 |
| -6.52 | 182  | 109 | 96  |
| -6    | 154  | 121 | 92  |
| -5.52 | 140  | 96  | 130 |
| -5    | 73   | 65  | 87  |

p*K*<sub>i</sub>

± p*K*<sub>i</sub>

PDSP IMS

*K*<sub>i</sub> (nM)



Compound ( $\pm$ )-**3h**, PDSP ID 53532, 5-HT<sub>2B</sub> receptor:

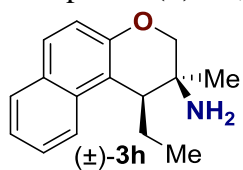

Duplicate trials:  $pK_i = 7.9$  (shown), 7.5; average of 7.7 reported.

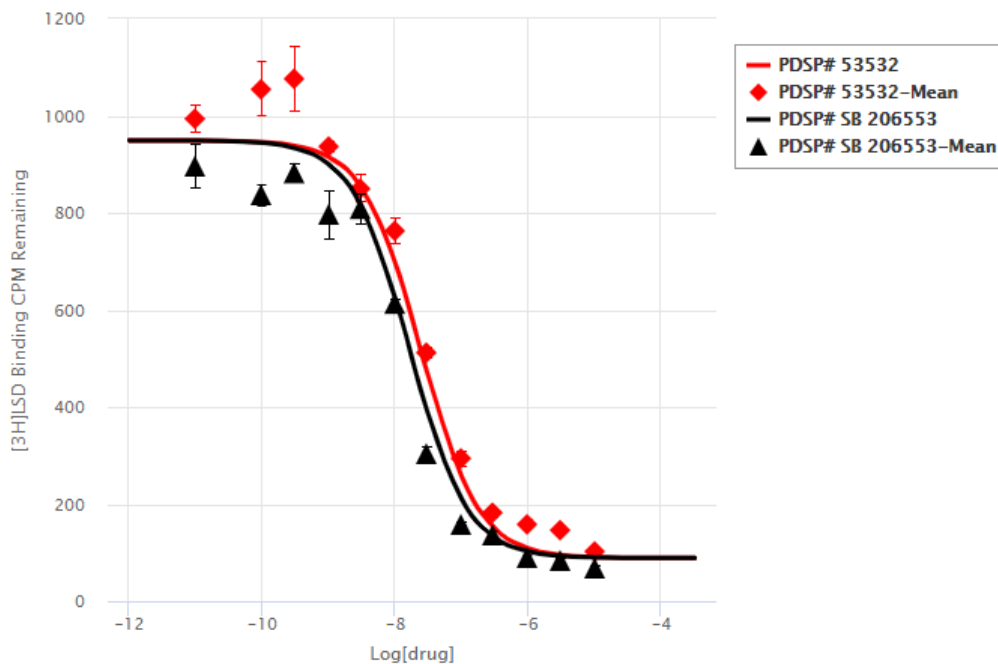

Compound: **3h**

PDSP ID: 53532

Receptor: 5-HT<sub>2B</sub>

log[**3h**]

|       | 1    | 2    | 3    |
|-------|------|------|------|
| -11   | 927  | 1018 | 1036 |
| -10   | 1010 | 967  | 1188 |
| -9.52 | 934  | 1072 | 1221 |
| -9    | 955  | 913  | 943  |
| -8.52 | 806  | 829  | 918  |
| -8    | 731  | 733  | 826  |
| -7.52 | 491  | 505  | 540  |
| -7    | 258  | 324  | 300  |
| -6.52 | 161  | 189  | 196  |
| -6    | 150  | 150  | 179  |
| -5.52 | 148  | 151  | 140  |
| -5    | 92   | 108  | 111  |
| -5    | 92   | 108  | 111  |

PDSP IMS

$pK_i$

$\pm pK_i$

$K_i$   
(nM)

|                | 1    | 2         | 3   |
|----------------|------|-----------|-----|
| <b>3h</b>      | 7.9  | $\pm 0.2$ | 12  |
| SB 206553      | 8.1  |           |     |
| log[SB 206553] | 1    | 2         | 3   |
| -11            | 1007 | 853       | 827 |
| -10            | 871  | 851       | 786 |
| -9.52          | 907  | 906       | 834 |
| -9             | 918  | 731       | 738 |
| -8.52          | 882  | 791       | 753 |
| -8             | 622  | 622       | 596 |
| -7.52          | 300  | 339       | 269 |
| -7             | 160  | 164       | 155 |
| -6.52          | 132  | 157       | 123 |
| -6             | 78   | 100       | 92  |
| -5.52          | 91   | 74        | 90  |
| -5             | 53   | 72        | 76  |
| -5             | 53   | 72        | 76  |

Compound ( $\pm$ )-**4c**, PDSP ID 52293, 5-HT<sub>7</sub> receptor:

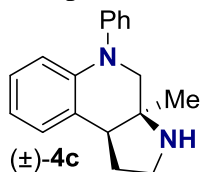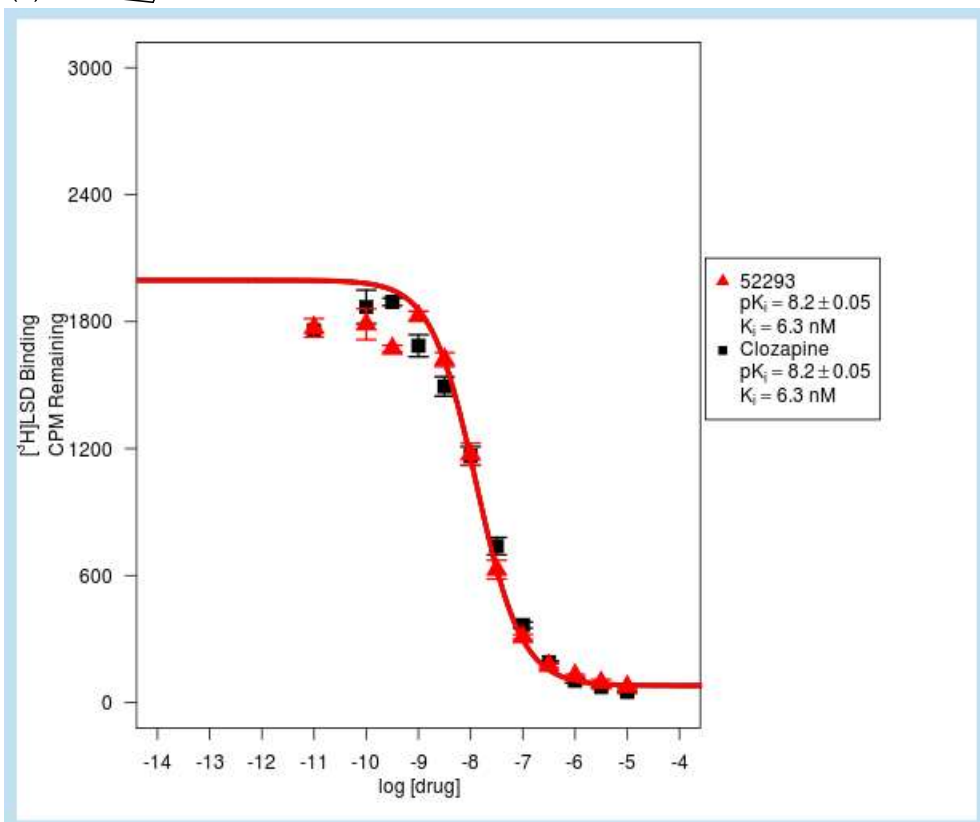

| Compound: <b>4c</b> |                   |      |      | $pK_i$         | $\pm pK_i$ | $K_i$ (nM) |      |
|---------------------|-------------------|------|------|----------------|------------|------------|------|
| PDSP ID:            | 52293             |      |      | <b>4c</b>      | 8.2        | $\pm 0.1$  | 6.3  |
| Receptor:           | 5-HT <sub>7</sub> |      |      | Clozapine      | 8.2        |            |      |
| log[ <b>4c</b> ]    | 1                 | 2    | 3    | Log[Clozapine] | 1          | 2          | 3    |
| -11                 | 1606              | 1814 | 1727 | -11            | 1416       | 1759       | 1583 |
| -10                 | 1661              | 1788 | 1914 | -10            | 1801       | 2028       | 1780 |
| -9.5                | 1652              | 1703 | 1662 | -9.5           | 1916       | 1904       | 1859 |
| -9                  | 1802              | 1871 | 1806 | -9             | 1585       | 1758       | 1715 |
| -8.5                | 1585              | 1687 | 1589 | -8.5           | 1564       | 1509       | 1408 |
| -8                  | 1252              | 1192 | 1074 | -8             | 1248       | 1146       | 1102 |
| -7.5                | 569               | 600  | 715  | -7.5           | 663        | 752        | 803  |
| -7                  | 288               | 324  | 317  | -7             | 342        | 364        | 392  |
| -6.5                | 190               | 176  | 156  | -6.5           | 202        | 186        | 184  |
| -6                  | 125               | 137  | 121  | -6             | 125        | 93         | 90   |
| -5.5                | 85                | 124  | 71   | -5.5           | 63         | 72         | 84   |
| -5                  | 68                | 82   | 72   | -5             | 53         | 59         | 38   |

Compound (±)-**10c**, PDSP ID 53545, 5-HT<sub>7</sub> receptor:

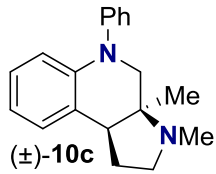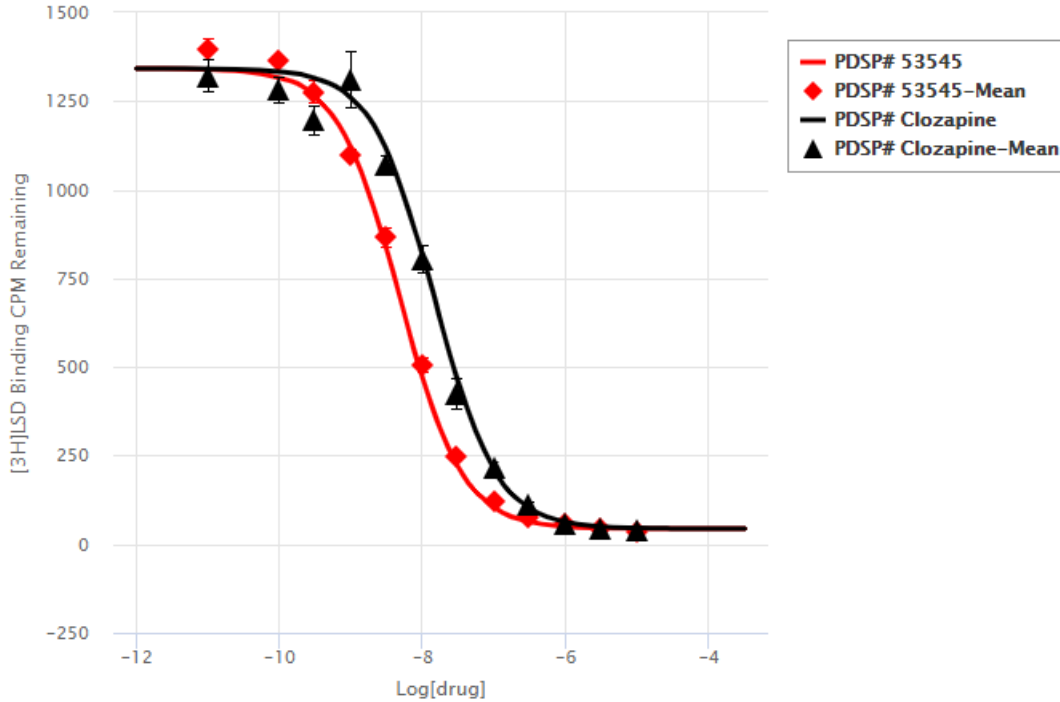

Compound: **10c**

PDSP ID: 53545

Receptor: 5-HT<sub>7</sub>

log[**10c**]

|       | 1    | 2    | 3    |
|-------|------|------|------|
| -11   | 1326 | 1428 | 1435 |
| -10   | 1376 | 1360 | 1359 |
| -9.52 | 1215 | 1270 | 1342 |
| -9    | 1076 | 1126 | 1097 |
| -8.52 | 815  | 854  | 927  |
| -8    | 453  | 533  | 532  |
| -7.52 | 224  | 264  | 250  |
| -7    | 104  | 136  | 124  |
| -6.52 | 71   | 79   | 70   |
| -6    | 65   | 53   | 48   |
| -5.52 | 49   | 32   | 53   |
| -5    | 27   | 28   | 48   |

**10c**

Clozapine

log[Clozapine]

|       | 1    | 2    | 3    |
|-------|------|------|------|
| -11   | 1209 | 1376 | 1375 |
| -10   | 1219 | 1261 | 1364 |
| -9.52 | 1109 | 1283 | 1195 |
| -9    | 746  | 1420 | 1196 |
| -8.52 | 1024 | 1126 | 1065 |
| -8    | 757  | 895  | 754  |
| -7.52 | 321  | 467  | 484  |
| -7    | 203  | 250  | 194  |
| -6.52 | 99   | 124  | 115  |
| -6    | 59   | 62   | 56   |
| -5.52 | 42   | 32   | 52   |
| -5    | 25   | 41   | 49   |

$pK_i$

$\pm pK_i$

PDSP IMS

$K_i$  (nM)

8.57  $\pm$ 0.04 2.4

8.1

Compound ( $\pm$ )-**4f**, PDSP ID 53550,  $\sigma_1$  receptor:

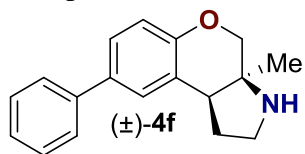

Triplicate trials:  $pK_i = 8.2$  (shown), 7.8, 7.8; average of 7.9 reported.

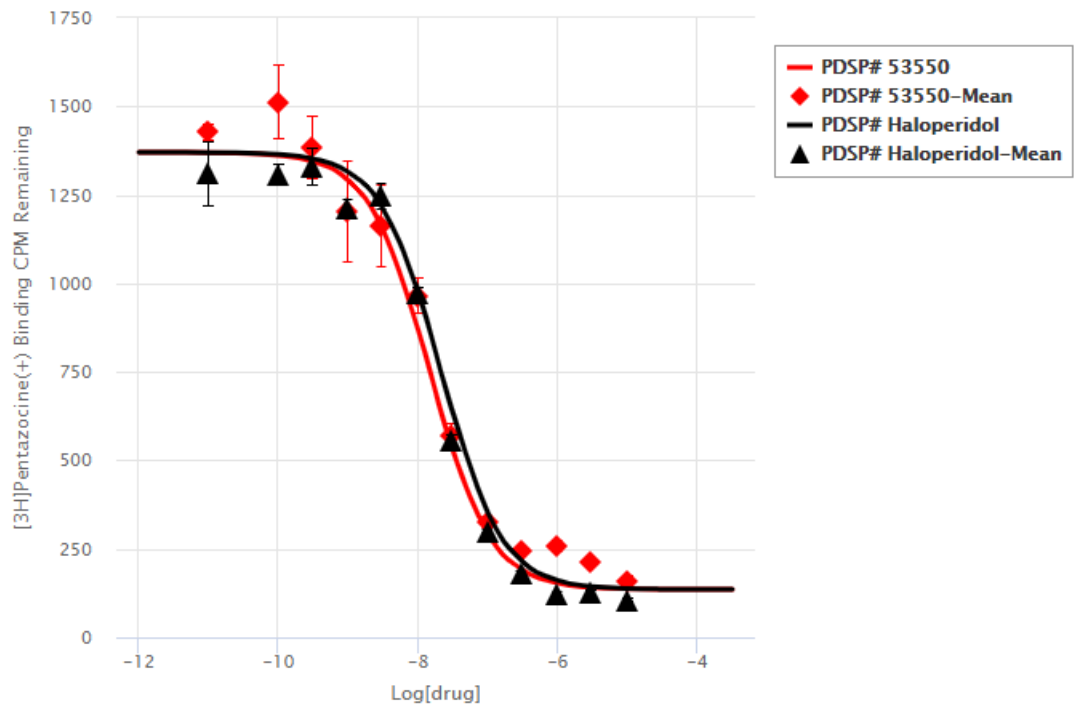

PDSP IMS

| Compound:        | <b>4f</b>  |      |      |                  | $pK_i$ | $\pm pK_i$ | $K_i$ (nM) |
|------------------|------------|------|------|------------------|--------|------------|------------|
| PDSP ID:         | 53550      |      |      | <b>4f</b>        | 8.2    | $\pm 0.1$  | 6.1        |
| Receptor:        | $\sigma_1$ |      |      | Haloperidol      | 8.1    |            |            |
| log[ <b>4f</b> ] | 1          | 2    | 3    | log[Haloperidol] | 1      | 2          | 3          |
| -11              | 1374       | 1444 | 1467 | -11              | 1089   | 1460       | 1380       |
| -10              | 1271       | 1694 | 1571 | -10              | 1276   | 1374       | 1275       |
| -9.52            | 1200       | 1575 | 1371 | -9.52            | 1211   | 1427       | 1349       |
| -9               | 1140       | 1529 | 941  | -9               | 1150   | 1237       | 1251       |
| -8.52            | 1233       | 1359 | 892  | -8.52            | 1167   | 1326       | 1246       |
| -8               | 943        | 1081 | 871  | -8               | 942    | 965        | 1009       |
| -7.52            | 567        | 641  | 503  | -7.52            | 591    | 550        | 525        |
| -7               | 369        | 302  | 306  | -7               | 309    | 300        | 290        |
| -6.52            | 268        | 229  | 229  | -6.52            | 193    | 173        | 175        |
| -6               | 296        | 245  | 231  | -6               | 137    | 114        | 119        |
| -5.52            | 229        | 206  | 208  | -5.52            | 131    | 134        | 115        |
| -5               | 188        | 134  | 156  | -5               | 94     | 110        | 112        |

Compound ( $\pm$ )-**4i**, PDSP ID 53552,  $\sigma_1$  receptor:

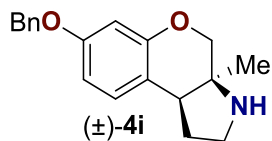

Triplicate trials:  $pK_i = 8.2$  (shown), 8.1, 8.0; average 8.1 reported.

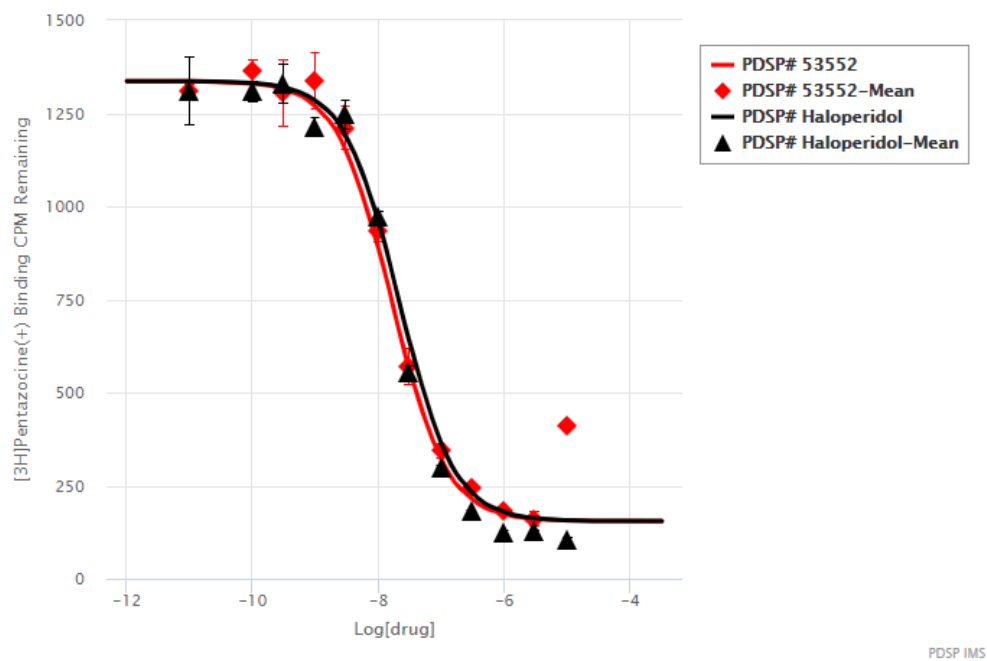

| Compound:        | <b>4i</b>  |      |      |                  | $pK_i$ | $\pm pK_i$ | $K_i$ (nM) |
|------------------|------------|------|------|------------------|--------|------------|------------|
| PDSP ID:         | 53552      |      |      | <b>4i</b>        | 8.2    | $\pm 0.1$  | 6.3        |
| Receptor:        | $\sigma_1$ |      |      | Haloperidol      | 8.1    |            |            |
| log[ <b>4i</b> ] | 1          | 2    | 3    | log[Haloperidol] | 1      | 2          | 3          |
| -11              | 1273       | 1342 | 1313 | -11              | 1089   | 1460       | 1380       |
| -10              | 1434       | 1350 | 1314 | -10              | 1276   | 1374       | 1275       |
| -9.52            | 1248       | 1518 | 1150 | -9.52            | 1211   | 1427       | 1349       |
| -9               | 1426       | 1430 | 1155 | -9               | 1150   | 1237       | 1251       |
| -8.52            | 1228       | 1323 | 1081 | -8.52            | 1167   | 1326       | 1246       |
| -8               | 941        | 989  | 871  | -8               | 942    | 965        | 1009       |
| -7.52            | 647        | 611  | 450  | -7.52            | 591    | 550        | 525        |
| -7               | 373        | 363  | 298  | -7               | 309    | 300        | 290        |
| -6.52            | 256        | 219  | 253  | -6.52            | 193    | 173        | 175        |
| -6               | 184        | 181  | 180  | -6               | 137    | 114        | 119        |
| -5.52            | 209        | 148  | 125  | -5.52            | 131    | 134        | 115        |
| -5               | 414        | 396  | 419  | -5               | 94     | 110        | 112        |

Compound ( $\pm$ )-**10d**, PDSP ID 53554,  $\sigma_1$  receptor:

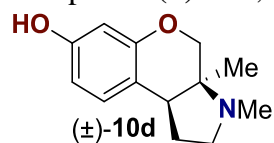

Triplicate trials:  $pK_i = 7.4$  (shown), 7.3, 7.1; average of 7.3 reported.

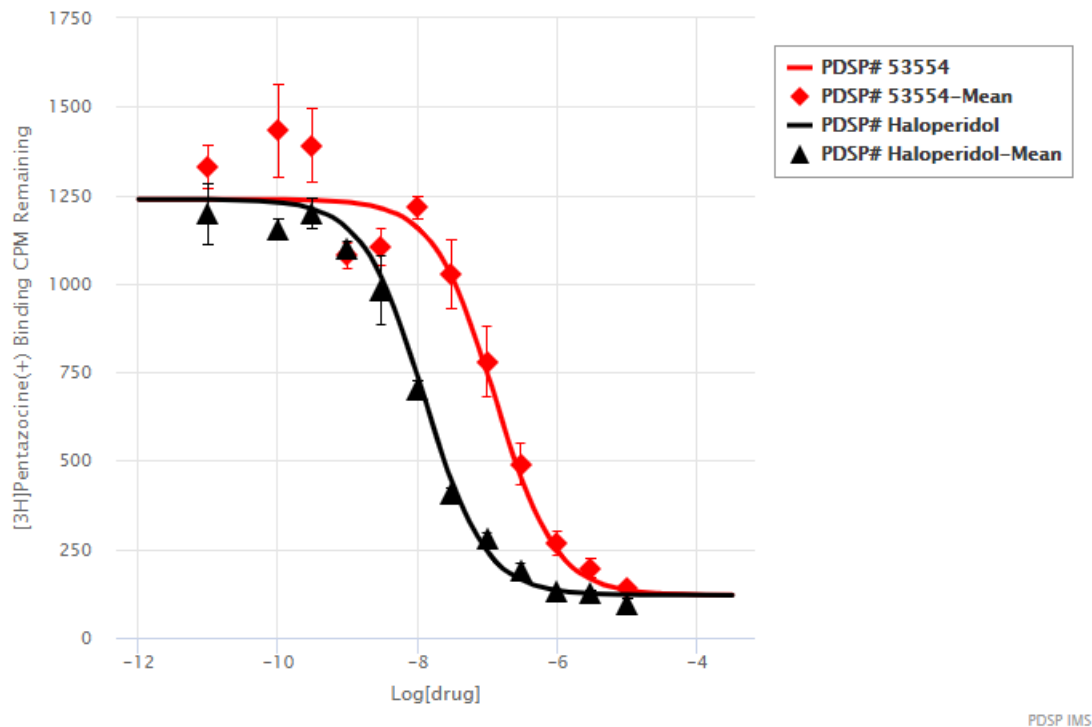

| Compound:  | <b>10d</b> |      |      | $pK_i$           | $\pm pK_i$ | $K_i$ (nM) |      |
|------------|------------|------|------|------------------|------------|------------|------|
| PDSP ID:   | 53554      |      |      | <b>10d</b>       | 7.4        | $\pm 0.1$  | 52   |
| Receptor:  | $\sigma_1$ |      |      | Haloperidol      | 8.3        |            |      |
| log[53554] | 1          | 2    | 3    | log[Haloperidol] | 1          | 2          | 3    |
| -11        | 1449       | 1193 | 1345 | -11              | 1187       | 1015       | 1387 |
| -10        | 1696       | 1456 | 1143 | -10              | 1225       | 1110       | 1129 |
| -9.52      | 1532       | 1502 | 1137 | -9.52            | 1134       | 1159       | 1300 |
| -9         | 1023       | 1168 | 1048 | -9               | 1038       | 1114       | 1138 |
| -8.52      | 999        | 1212 | 1098 | -8.52            | 874        | 848        | 1219 |
| -8         | 1282       | 1203 | 1158 | -8               | 718        | 644        | 741  |
| -7.52      | 1268       | 887  | 925  | -7.52            | 362        | 429        | 424  |
| -7         | 877        | 539  | 922  | -7               | 242        | 310        | 288  |
| -6.52      | 572        | 345  | 549  | -6.52            | 146        | 215        | 215  |
| -6         | 318        | 183  | 302  | -6               | 128        | 142        | 121  |
| -5.52      | 214        | 130  | 244  | -5.52            | 109        | 144        | 124  |
| -5         | 128        | 131  | 155  | -5               | 121        | 102        | 63   |

Compound ( $\pm$ )-**4j**, PDSP ID 52294,  $\sigma_1$  receptor:

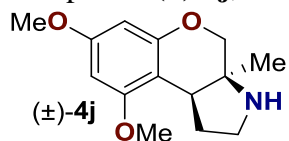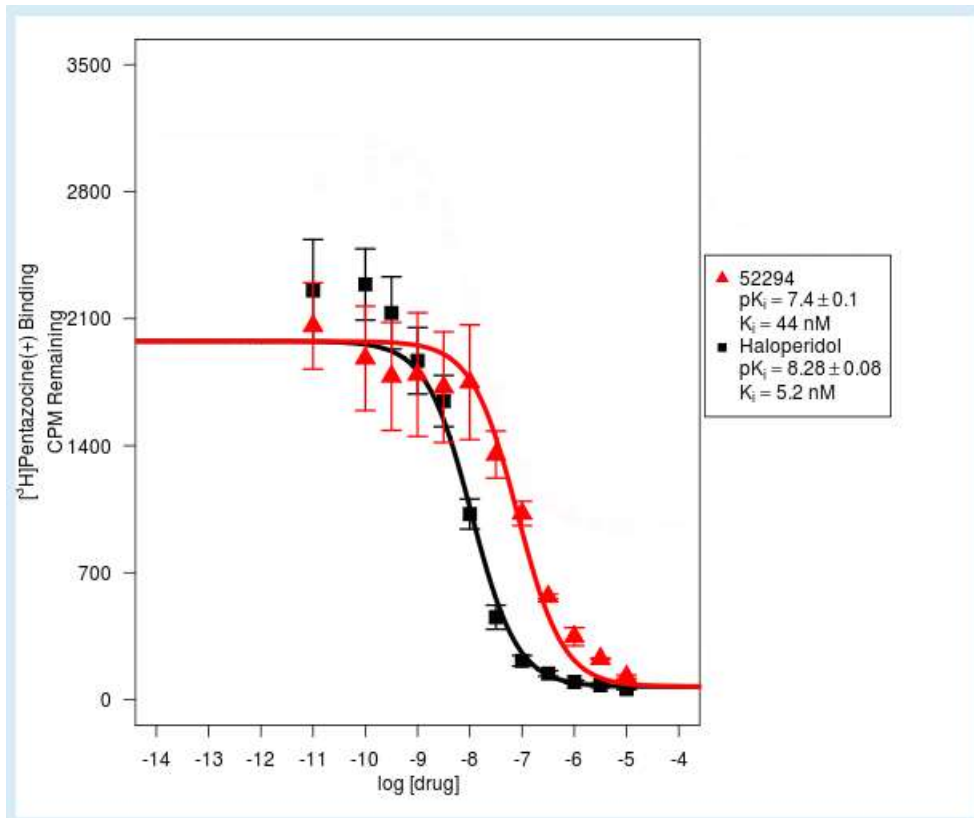

| Compound:        | <b>4j</b>  |      |      | $pK_i$           | $\pm pK_i$ | $K_i$ (nM) |      |
|------------------|------------|------|------|------------------|------------|------------|------|
| PDSP ID:         | 52294      |      |      | <b>4j</b>        | 7.4        | $\pm 0.1$  | 44   |
| Receptor:        | $\sigma_1$ |      |      | Haloperidol      | 8.28       |            |      |
| Log[ <b>4j</b> ] | 1          | 2    | 3    | Log[Haloperidol] | 1          | 2          | 3    |
| -11              | 2529       | 1895 | 1756 | -11              | 2795       | 1851       | 2120 |
| -10              | 2408       | 1418 | 1818 | -10              | 2681       | 2106       | 2079 |
| -9.5             | 2246       | 1227 | 1873 | -9.5             | 2491       | 1803       | 2101 |
| -9               | 2266       | 1131 | 1979 | -9               | 1984       | 1509       | 2111 |
| -8.5             | 2154       | 1134 | 1880 | -8.5             | 1859       | 1378       | 1701 |
| -8               | 2251       | 1166 | 1832 | -8               | 1189       | 935        | 945  |
| -7.5             | 1470       | 1092 | 1491 | -7.5             | 401        | 377        | 586  |
| -7               | 1129       | 901  | 1049 | -7               | 192        | 179        | 272  |
| -6.5             | 564        | 549  | 592  | -6.5             | 120        | 141        | 171  |
| -6               | 432        | 349  | 260  | -6               | 92         | 87         | 115  |
| -5.5             | 221        | 225  | 232  | -5.5             | 57         | 83         | 98   |
| -5               | 134        | 108  | 139  | -5               | 56         | 57         | 61   |

Compound ( $\pm$ )-4k, PDSP ID 53537, 5-HT<sub>2B</sub> receptor:

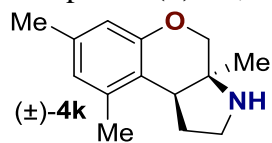

Duplicate trials:  $pK_i = 7.2$  (shown) and 7.0; average of 7.1 reported.

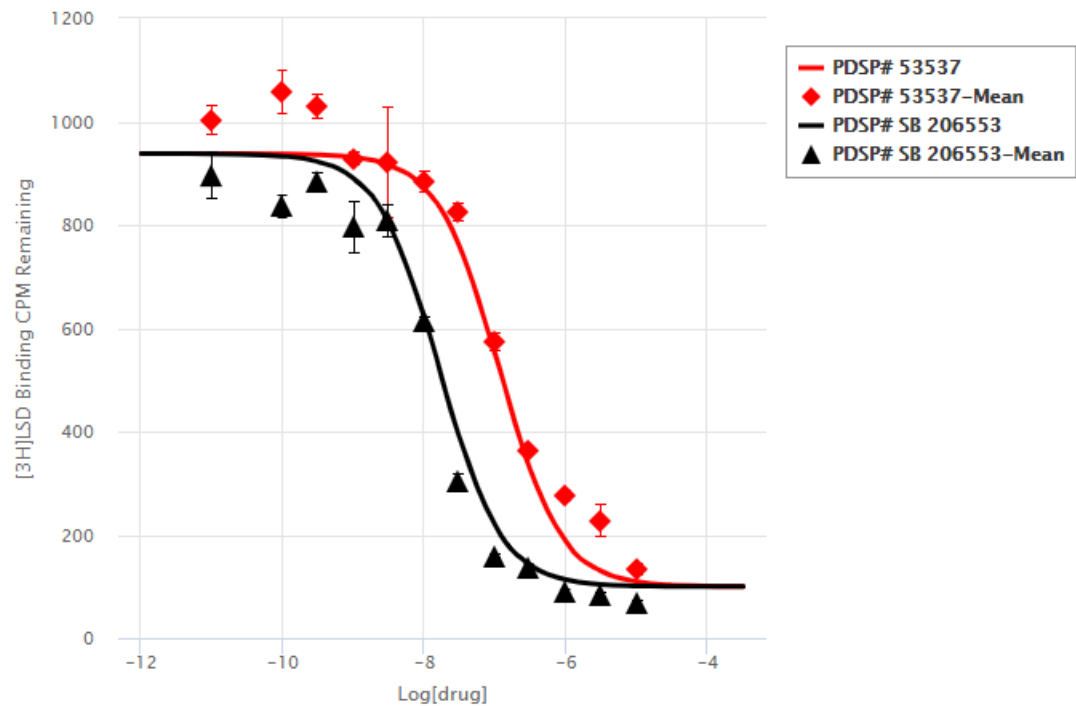

|           |                    |      |      | PDSP IMS       |           |           |     |
|-----------|--------------------|------|------|----------------|-----------|-----------|-----|
| Compound: | 4k                 |      |      | pKi            | $\pm$ pKi | Ki (nM)   |     |
| PDSP ID:  | 53537              |      |      | 4k             | 7.2       | $\pm 0.1$ | 63  |
| Receptor: | 5-HT <sub>2B</sub> |      |      | SB 206553      | 8.1       |           |     |
| log[4k]   | 1                  | 2    | 3    | log[SB 206553] | 1         | 2         | 3   |
| -11       | 988                | 950  | 1069 | -11            | 1007      | 853       | 827 |
| -10       | 990                | 1027 | 1158 | -10            | 871       | 851       | 786 |
| -9.52     | 1008               | 994  | 1088 | -9.52          | 907       | 906       | 834 |
| -9        | 939                | 898  | 947  | -9             | 918       | 731       | 738 |
| -8.52     | 1129               | 678  | 955  | -8.52          | 882       | 791       | 753 |
| -8        | 840                | 880  | 931  | -8             | 622       | 622       | 596 |
| -7.52     | 841                | 853  | 783  | -7.52          | 300       | 339       | 269 |
| -7        | 539                | 568  | 614  | -7             | 160       | 164       | 155 |
| -6.52     | 363                | 367  | 357  | -6.52          | 132       | 157       | 123 |
| -6        | 275                | 253  | 302  | -6             | 78        | 100       | 92  |
| -5.52     | 166                | 219  | 297  | -5.52          | 91        | 74        | 90  |
| -5        | 109                | 146  | 146  | -5             | 53        | 72        | 76  |



Compound ( $\pm$ )-**4k**, PDSP ID 53537,  $\sigma_1$  receptor:

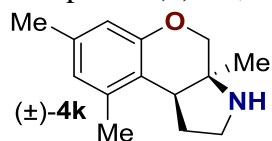

Triplicate trials:  $pK_i = 7.3$  (shown), 7.1, 7.2; average of 7.2 reported.

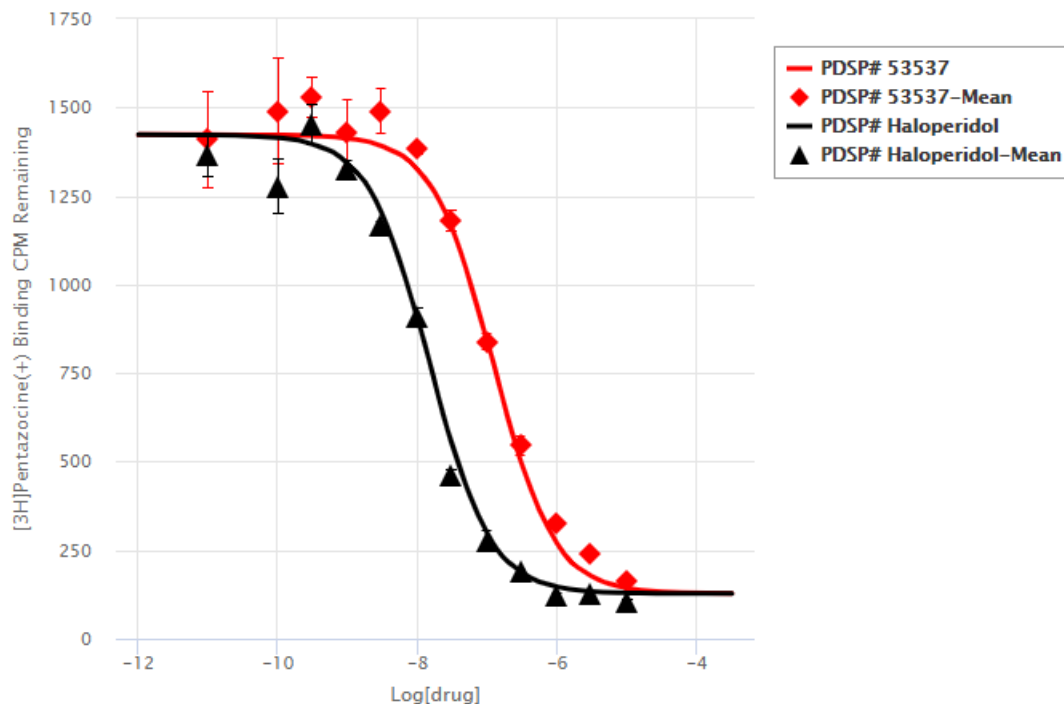

| Compound: <b>4k</b> |            |      |      | PDSP IMS         |            |            |      |
|---------------------|------------|------|------|------------------|------------|------------|------|
| PDSP ID:            | <b>4k</b>  |      |      | $pK_i$           | $\pm pK_i$ | $K_i$ (nM) |      |
| Receptor:           | $\sigma_1$ |      |      | 7.3              | $\pm 0.1$  | 50         |      |
| log[ <b>4k</b> ]    | 1          | 2    | 3    | log[Haloperidol] | 1          | 2          | 3    |
| -11                 | 1463       | 1097 | 1667 | -11              | 1264       | 1328       | 1505 |
| -10                 | 1478       | 1176 | 1815 | -10              | 1415       | 1094       | 1322 |
| -9.52               | 1515       | 1414 | 1653 | -9.52            | 1580       | 1351       | 1423 |
| -9                  | 1533       | 1195 | 1557 | -9               | 1378       | 1273       | 1318 |
| -8.52               | 1453       | 1374 | 1641 | -8.52            | 1175       | 1147       | 1184 |
| -8                  | 1419       | 1358 | 1368 | -8               | 929        | 954        | 842  |
| -7.52               | 1145       | 1257 | 1139 | -7.52            | 494        | 457        | 438  |
| -7                  | 792        | 841  | 882  | -7               | 349        | 257        | 224  |
| -6.52               | 480        | 588  | 568  | -6.52            | 202        | 193        | 171  |
| -6                  | 301        | 342  | 334  | -6               | 142        | 110        | 108  |
| -5.52               | 244        | 226  | 249  | -5.52            | 128        | 141        | 111  |
| -5                  | 166        | 153  | 175  | -5               | 118        | 93         | 98   |

Compound ( $\pm$ )-**4I**, PDSP ID 52295, 5-HT<sub>7</sub> receptor:

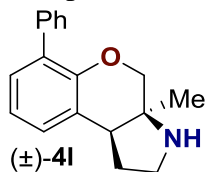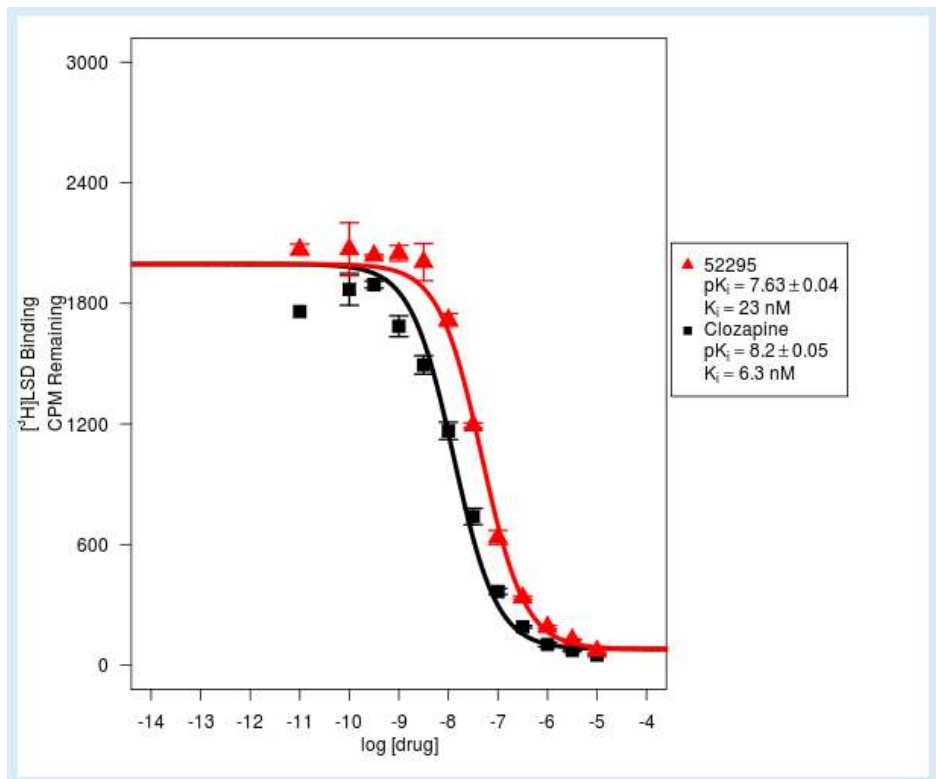

| Compound:        | <b>4I</b>         |      |      | $pK_i$         | $\pm pK_i$ | $K_i$ (nM) |      |
|------------------|-------------------|------|------|----------------|------------|------------|------|
| PDSP ID:         | 52295             |      |      | <b>4I</b>      | 7.63       | $\pm 0.04$ | 23   |
| Receptor:        | 5-HT <sub>7</sub> |      |      | Clozapine      | 8.2        |            |      |
| log[ <b>4I</b> ] | 1                 | 2    | 3    | log[Clozapine] | 1          | 2          | 3    |
| -11              | 2063              | 2116 | 2025 | -11            | 1416       | 1759       | 1583 |
| -10              | 1938              | 2201 | 2373 | -10            | 1801       | 2028       | 1780 |
| -9.5             | 2043              | 2032 | 2461 | -9.5           | 1916       | 1904       | 1859 |
| -9               | 1984              | 2046 | 2118 | -9             | 1585       | 1758       | 1715 |
| -8.5             | 1972              | 1864 | 2179 | -8.5           | 1564       | 1509       | 1408 |
| -8               | 1755              | 1743 | 1655 | -8             | 1248       | 1146       | 1102 |
| -7.5             | 1214              | 1190 | 1175 | -7.5           | 663        | 752        | 803  |
| -7               | 606               | 705  | 594  | -7             | 342        | 364        | 392  |
| -6.5             | 327               | 328  | 351  | -6.5           | 202        | 186        | 184  |
| -6               | 193               | 173  | 201  | -6             | 125        | 93         | 90   |
| -5.5             | 132               | 122  | 126  | -5.5           | 63         | 72         | 84   |
| -5               | 56                | 76   | 80   | -5             | 53         | 59         | 38   |

Compound ( $\pm$ )-**4I**, PDSP ID 52295,  $\sigma_1$  receptor:

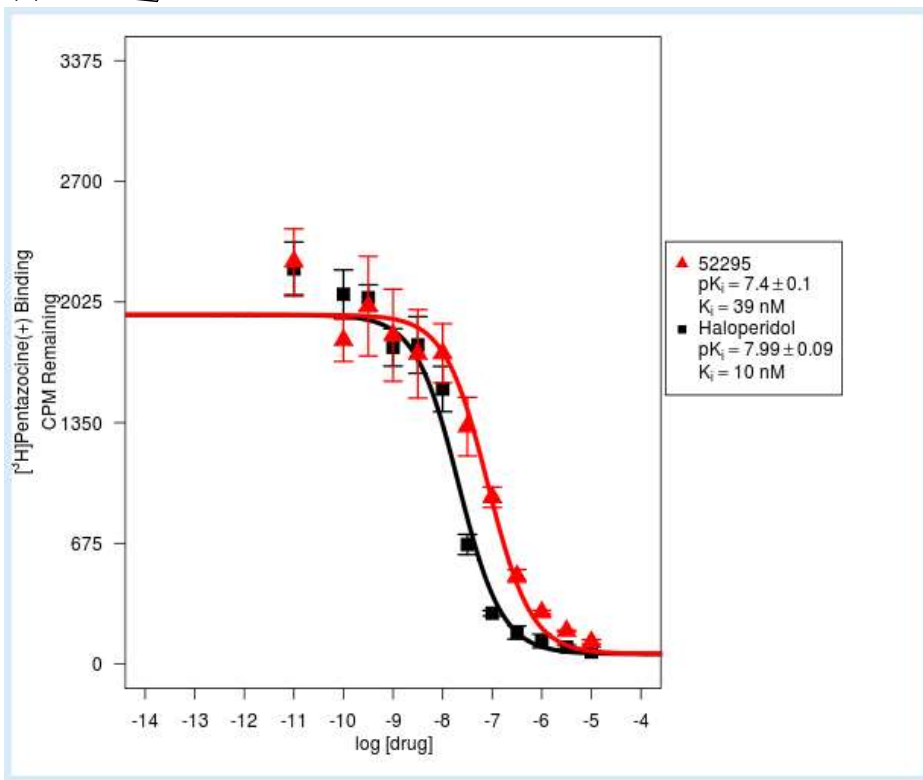

| Compound:        | <b>4I</b>         |      |      | $pK_i$           | $\pm pK_i$ | $K_i$ (nM) |      |
|------------------|-------------------|------|------|------------------|------------|------------|------|
| PDSP ID:         | 52295             |      |      | <b>4I</b>        | 7.4        | $\pm 0.1$  | 39   |
| Receptor:        | 5-HT <sub>7</sub> |      |      | Haloperidol      | 7.99       |            |      |
| log[ <b>4I</b> ] | 1                 | 2    | 3    | log[Haloperidol] | 1          | 2          | 3    |
| -11              | 2159              | 1989 | 2604 | -11              | 2313       | 1913       | 2404 |
| -10              | 1957              | 1901 | 1576 | -10              | 2063       | 1835       | 2307 |
| -9.5             | 1925              | 1562 | 2518 | -9.5             | 2054       | 1921       | 2171 |
| -9               | 2070              | 1325 | 2122 | -9               | 1824       | 1569       | 1919 |
| -8.5             | 1765              | 1292 | 2148 | -8.5             | 1835       | 1489       | 2030 |
| -8               | 1772              | 1437 | 2006 | -8               | 1593       | 1297       | 1724 |
| -7.5             | 1445              | 1004 | 1535 | -7.5             | 773        | 579        | 653  |
| -7               | 973               | 821  | 1004 | -7               | 274        | 264        | 314  |
| -6.5             | 551               | 497  | 429  | -6.5             | 132        | 146        | 249  |
| -6               | 268               | 299  | 300  | -6               | 80         | 103        | 203  |
| -5.5             | 177               | 189  | 190  | -5.5             | 80         | 82         | 119  |
| -5               | 133               | 138  | 100  | -5               | 62         | 58         | 81   |

Compound ( $\pm$ )-**10I**, PDSP ID 53540, 5-HT<sub>7</sub> receptor:

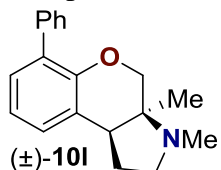

Triplicate trials:  $pK_i = 7.8$  (shown), 7.6, 7.7 ; average of 7.7 reported.

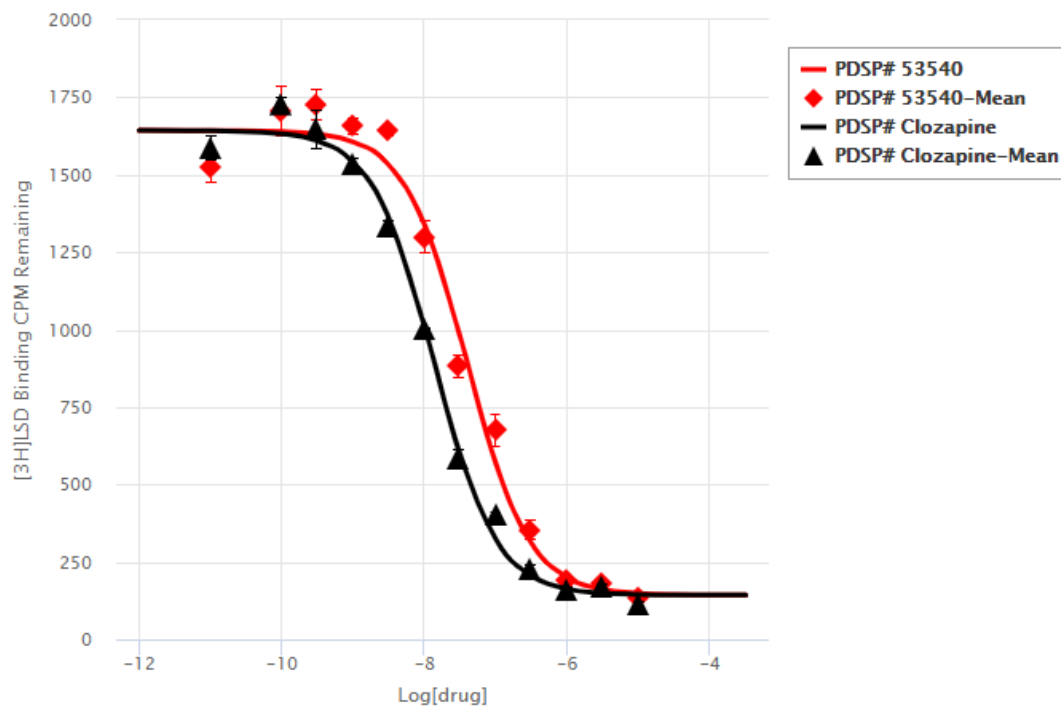

|                   |                   |      |      | PDSP IMS       |            |            |      |
|-------------------|-------------------|------|------|----------------|------------|------------|------|
| Compound:         | <b>10I</b>        |      |      | $pK_i$         | $\pm pK_i$ | $K_i$ (nM) |      |
| PDSP ID:          | 53540             |      |      | <b>10I</b>     | 7.8        | $\pm 0.1$  | 16   |
| Receptor:         | 5-HT <sub>7</sub> |      |      | Clozapine      | 8.2        |            |      |
| log[ <b>10I</b> ] | 1                 | 2    | 3    | log[Clozapine] | 1          | 2          | 3    |
| -11               | 1595              | 1581 | 1405 | -11            | 1680       | 1566       | 1516 |
| -10               | 1832              | 1510 | 1768 | -10            | 1741       | 1675       | 1767 |
| -9.52             | 1840              | 1638 | 1705 | -9.52          | 1732       | 1496       | 1711 |
| -9                | 1720              | 1629 | 1622 | -9             | 1527       | 1576       | 1496 |
| -8.52             | 1677              | 1611 | 1637 | -8.52          | 1317       | 1299       | 1379 |
| -8                | 1266              | 1213 | 1420 | -8             | 998        | 1013       | 1001 |
| -7.52             | 904               | 800  | 943  | -7.52          | 541        | 656        | 552  |
| -7                | 806               | 620  | 598  | -7             | 404        | 398        | 415  |
| -6.52             | 420               | 290  | 350  | -6.52          | 206        | 211        | 259  |
| -6                | 218               | 152  | 199  | -6             | 133        | 176        | 169  |
| -5.52             | 208               | 153  | 179  | -5.52          | 157        | 168        | 190  |
| -5                | 136               | 102  | 171  | -5             | 90         | 127        | 120  |

Compound ( $\pm$ )-**10I**, PDSP ID 53540,  $\sigma_1$  receptor:

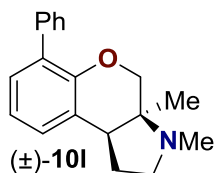

Triplicate trials:  $pK_i = 7.4$  (shown), 7.3, 7.2; average of 7.3 reported.

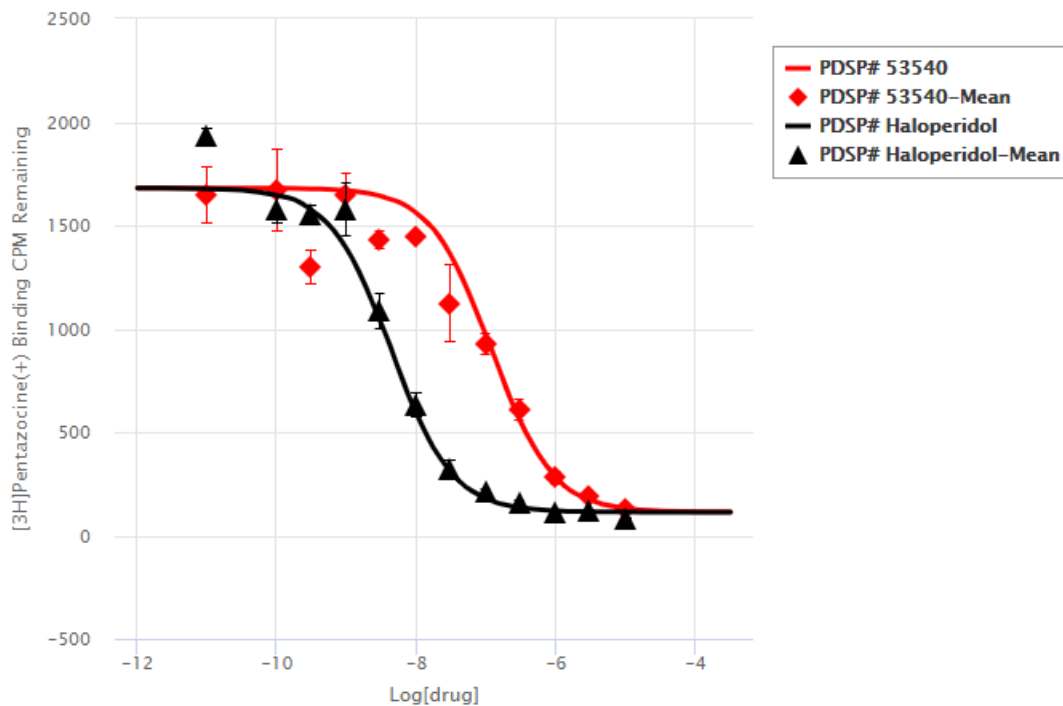

| Compound: <b>10I</b> |             |      |      | PDSP IMS         |            |            |      |
|----------------------|-------------|------|------|------------------|------------|------------|------|
| PDSP ID:             | <b>10I</b>  |      |      | $pK_i$           | $\pm pK_i$ | $K_i$ (nM) |      |
| 53540                |             |      |      | 7.4              | $\pm 0.1$  | 40         |      |
| Receptor:            | Haloperidol |      |      |                  |            |            |      |
| $\sigma_1$           |             |      |      | 8.8              |            |            |      |
| log[ <b>10I</b> ]    | 1           | 2    | 3    | log[Haloperidol] | 1          | 2          | 3    |
| -11                  | 1326        | 1877 | 1743 | -11              | 1944       | 1838       | 2012 |
| -10                  | 1210        | 1776 | 2029 | -10              | 1449       | 1558       | 1734 |
| -9.52                | 1106        | 1440 | 1353 | -9.52            | 1472       | 1532       | 1651 |
| -9                   | 1592        | 1441 | 1899 | -9               | 1552       | 1865       | 1314 |
| -8.52                | 1335        | 1441 | 1514 | -8.52            | 1012       | 1291       | 960  |
| -8                   | 1427        | 1465 | 1446 | -8               | 740        | 656        | 499  |
| -7.52                | 1151        | 716  | 1505 | -7.52            | 428        | 267        | 278  |
| -7                   | 821         | 924  | 1031 | -7               | 189        | 231        | 229  |
| -6.52                | 491         | 639  | 692  | -6.52            | 154        | 181        | 148  |
| -6                   | 294         | 211  | 337  | -6               | 119        | 122        | 99   |
| -5.52                | 202         | 203  | 162  | -5.52            | 122        | 123        | 110  |
| -5                   | 134         | 98   | 154  | -5               | 83         | 78         | 85   |

Compound ( $\pm$ )-**4m**, PDSP ID 53542, 5-HT<sub>2B</sub> receptor:

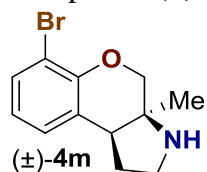

Triplicate trials:  $pK_i = 7.8$  (shown), 7.5, 7.7; average of 7.7 reported.

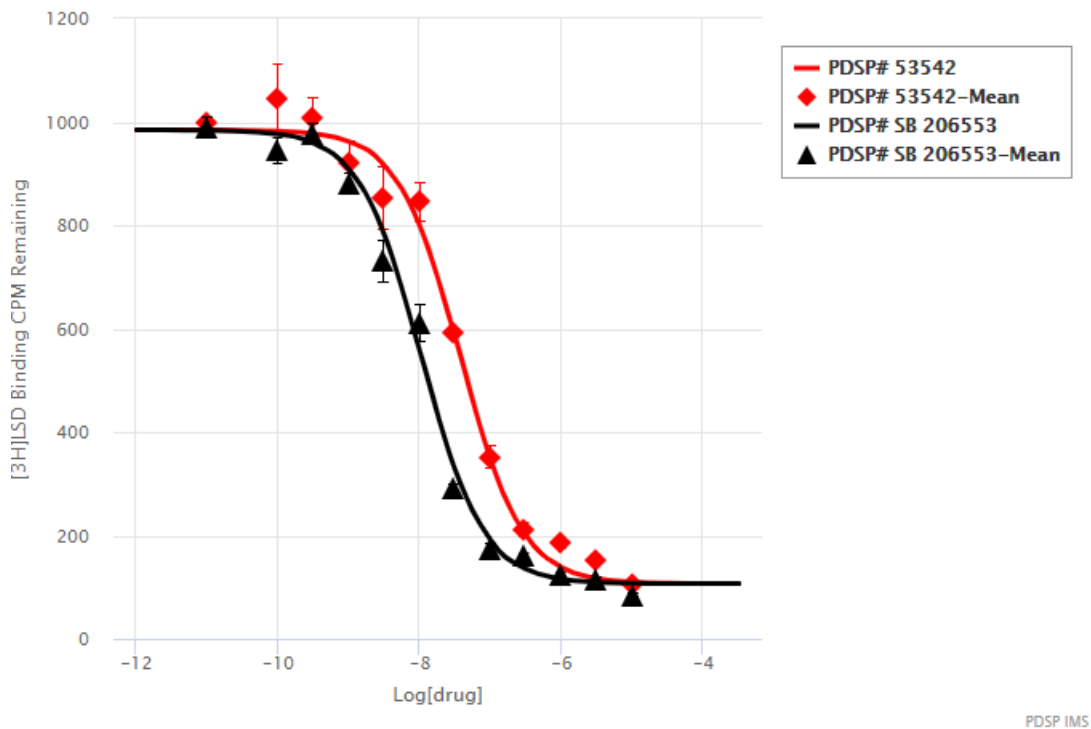

| Compound:        | <b>4m</b>          |      |      |                | $pK_i$ | $\pm pK_i$ | $K_i$ (nM) |
|------------------|--------------------|------|------|----------------|--------|------------|------------|
| PDSP ID:         | 53542              |      |      | <b>4m</b>      | 7.8    | $\pm 0.1$  | 16         |
| Receptor:        | 5-HT <sub>2B</sub> |      |      | SB 206553      | 8.29   |            |            |
| log[ <b>4m</b> ] | 1                  | 2    | 3    | log[SB 206553] | 1      | 2          | 3          |
| -11              | 1018               | 971  | 1002 | -11            | 941    | 1012       | 1017       |
| -10              | 1148               | 1099 | 892  | -10            | 889    | 954        | 993        |
| -9.52            | 957                | 1099 | 971  | -9.52          | 959    | 943        | 1028       |
| -9               | 992                | 953  | 815  | -9             | 879    | 842        | 924        |
| -8.52            | 827                | 991  | 742  | -8.52          | 711    | 655        | 825        |
| -8               | 914                | 864  | 758  | -8             | 547    | 593        | 695        |
| -7.52            | 579                | 606  | 594  | -7.52          | 274    | 298        | 301        |
| -7               | 404                | 328  | 322  | -7             | 153    | 164        | 202        |
| -6.52            | 205                | 183  | 242  | -6.52          | 165    | 150        | 166        |
| -6               | 164                | 183  | 207  | -6             | 133    | 121        | 120        |
| -5.52            | 137                | 146  | 170  | -5.52          | 99     | 115        | 128        |
| -5               | 115                | 88   | 117  | -5             | 81     | 91         | 83         |

Compound ( $\pm$ )-**4o**, PDSP ID 53548,  $\sigma_2$  receptor:

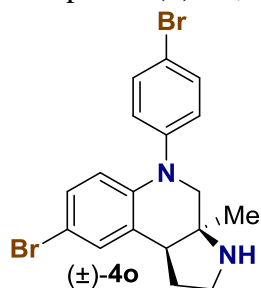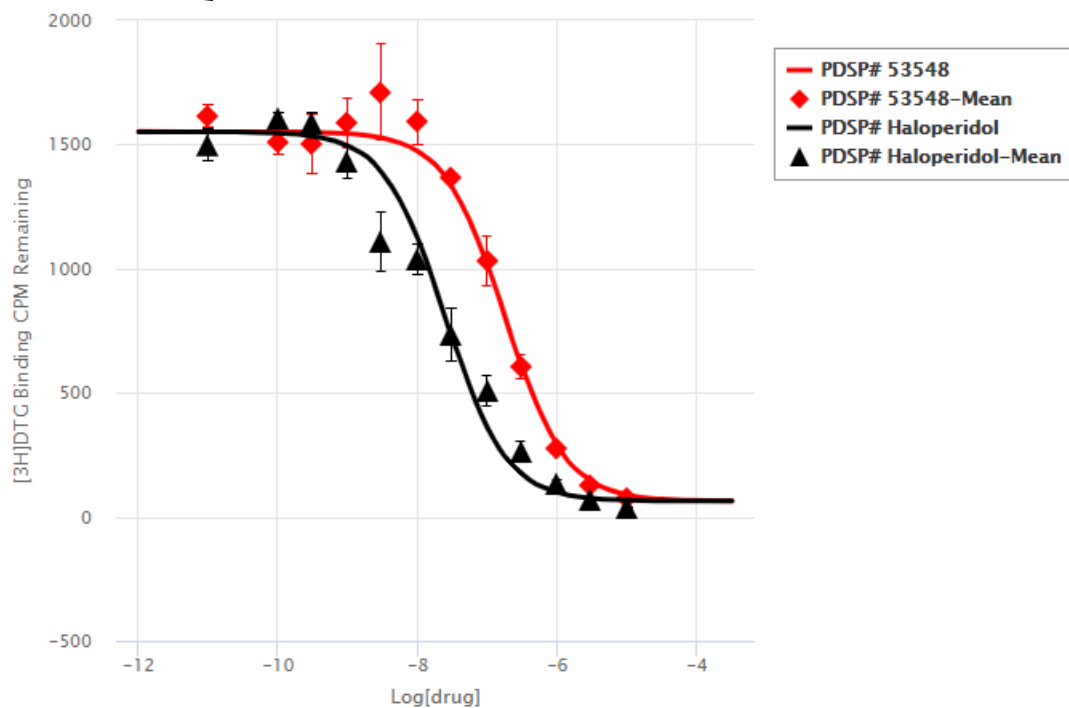

| Compound: <b>4o</b> |             |      |      | PDSP IMS         |            |            |      |
|---------------------|-------------|------|------|------------------|------------|------------|------|
| PDSP ID:            | <b>4o</b>   |      |      | $pK_i$           | $\pm pK_i$ | $K_i$ (nM) |      |
| 53548               |             |      |      | 7.1              | $\pm 0.2$  | 80         |      |
| Receptor:           | Haloperidol |      |      | $pK_i$           |            |            |      |
| $\sigma_2$          |             |      |      | 7.95             |            |            |      |
| log[53548]          | 1           | 2    | 3    | log[Haloperidol] | 1          | 2          | 3    |
| -11                 | 1651        | 1690 | 1503 | -11              | 1604       | 1345       | 1544 |
| -10                 | 1496        | 1620 | 1418 | -10              | 1645       | 1614       | 1557 |
| -9.52               | 1331        | 1671 | 810  | -9.52            | 1595       | 1666       | 1503 |
| -9                  | 1562        | 1811 | 1392 | -9               | 1346       | 1348       | 1593 |
| -8.52               | 2097        | 1754 | 1285 | -8.52            | 1385       | 1044       | 899  |
| -8                  | 1619        | 1766 | 1385 | -8               | 1064       | 1147       | 899  |
| -7.52               | 1361        | 1374 | 1375 | -7.52            | 861        | 871        | 470  |
| -7                  | 885         | 1177 | 1820 | -7               | 542        | 621        | 368  |
| -6.52               | 542         | 722  | 553  | -6.52            | 319        | 301        | 174  |
| -6                  | 280         | 289  | 263  | -6               | 165        | 113        | 122  |
| -5.52               | 146         | 128  | 114  | -5.52            | 69         | 67         | 65   |
| -5                  | 93          | 68   | 60   | -5               | 48         | 36         | 31   |

## Additional Cellular Assays

Two additional cellular assays were conducted to further investigate the activity of compound **4j** on 661W cells were treated with tBHP. They were (i) to demonstrate a dose responsive behavior of compound **4j** and (ii) to demonstrate the the activity of **4j** could be counteracted by the addition of a sigma 1 receptor antagonist.

**Figure S1. Enhanced 661W Cell Viability with Compound 4j Upon tBHP Exposure**

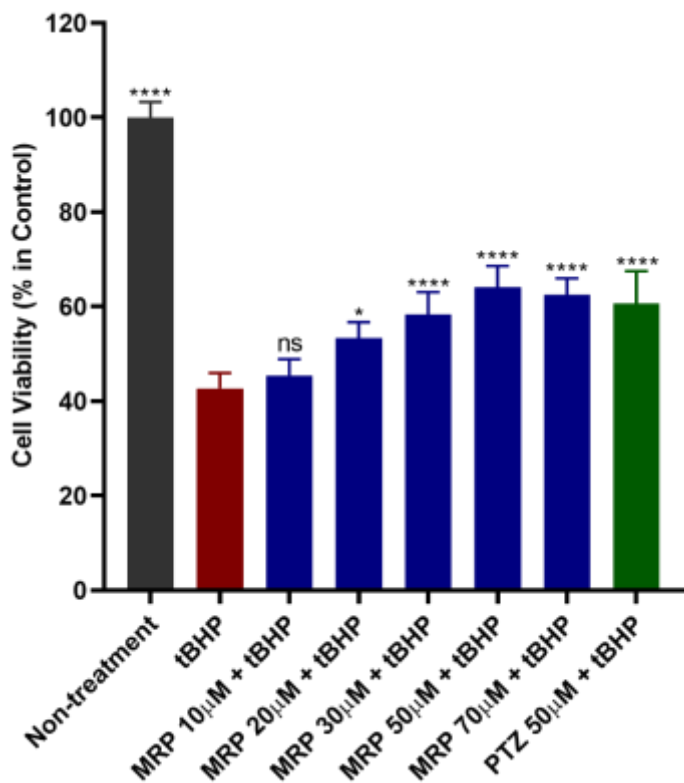

661W cells were treated with tBHP in the presence/absence of increasing concentrations of compound **4j** (10-70  $\mu$ M) or the  $\sigma_1$  receptor ligand PTZ (50  $\mu$ M) for 24 h before cell viability assessment. Cell viability was assessed using the MTT assay. Data are presented as mean  $\pm$  standard error of the mean (SEM) of triplicate measurements, \* $p$  < 0.05. \*\* $p$  < 0.01; \*\*\* $p$  < 0.001, \*\*\*\* $p$  < 0.0001, ns = not significant as compared to the tBHP treatment. (tBHP = *tert*-butyl hydroperoxide; MRP = compound **4j**; PTZ = (+)-pentazocine).



**Figure S2. BD1063 blocked the protective effect of MRP3215 in 661W cells treated with tBHP.**

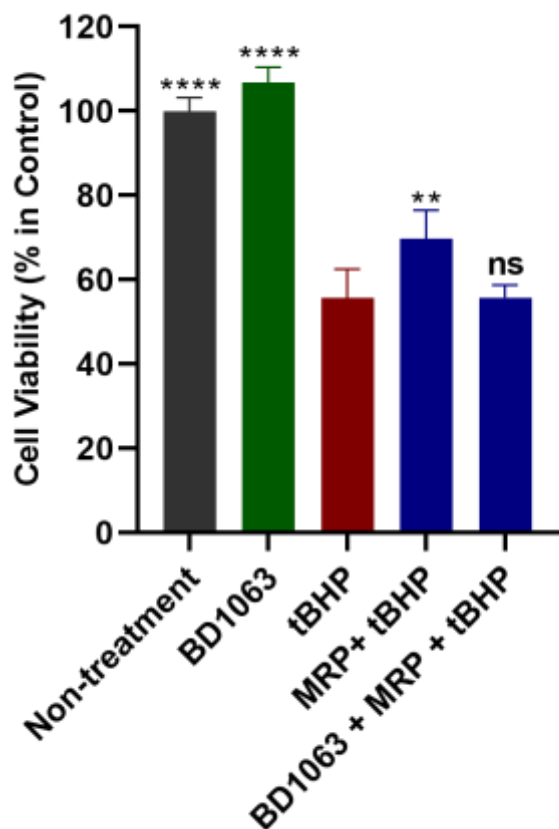

661W cells were pre-treated with/without BD1063 (10  $\mu$ M) for 30 minutes. Then the cells were treated with tBHP alone or compound **4j** (30  $\mu$ M) and tBHP in the presence/absence of BD1063 (10  $\mu$ M) for 24 h before cell viability assessment. Cell viability was assessed using the MTT assay. Data are presented as mean  $\pm$  standard error of the mean (SEM) of triplicate measurements. \*\*  $p < 0.01$ ; \*\*\*\*  $p < 0.0001$ , ns = not significant as compared to the tBHP treatment. (tBHP = tert-butyl hydroperoxide; MRP = compound **4j**).

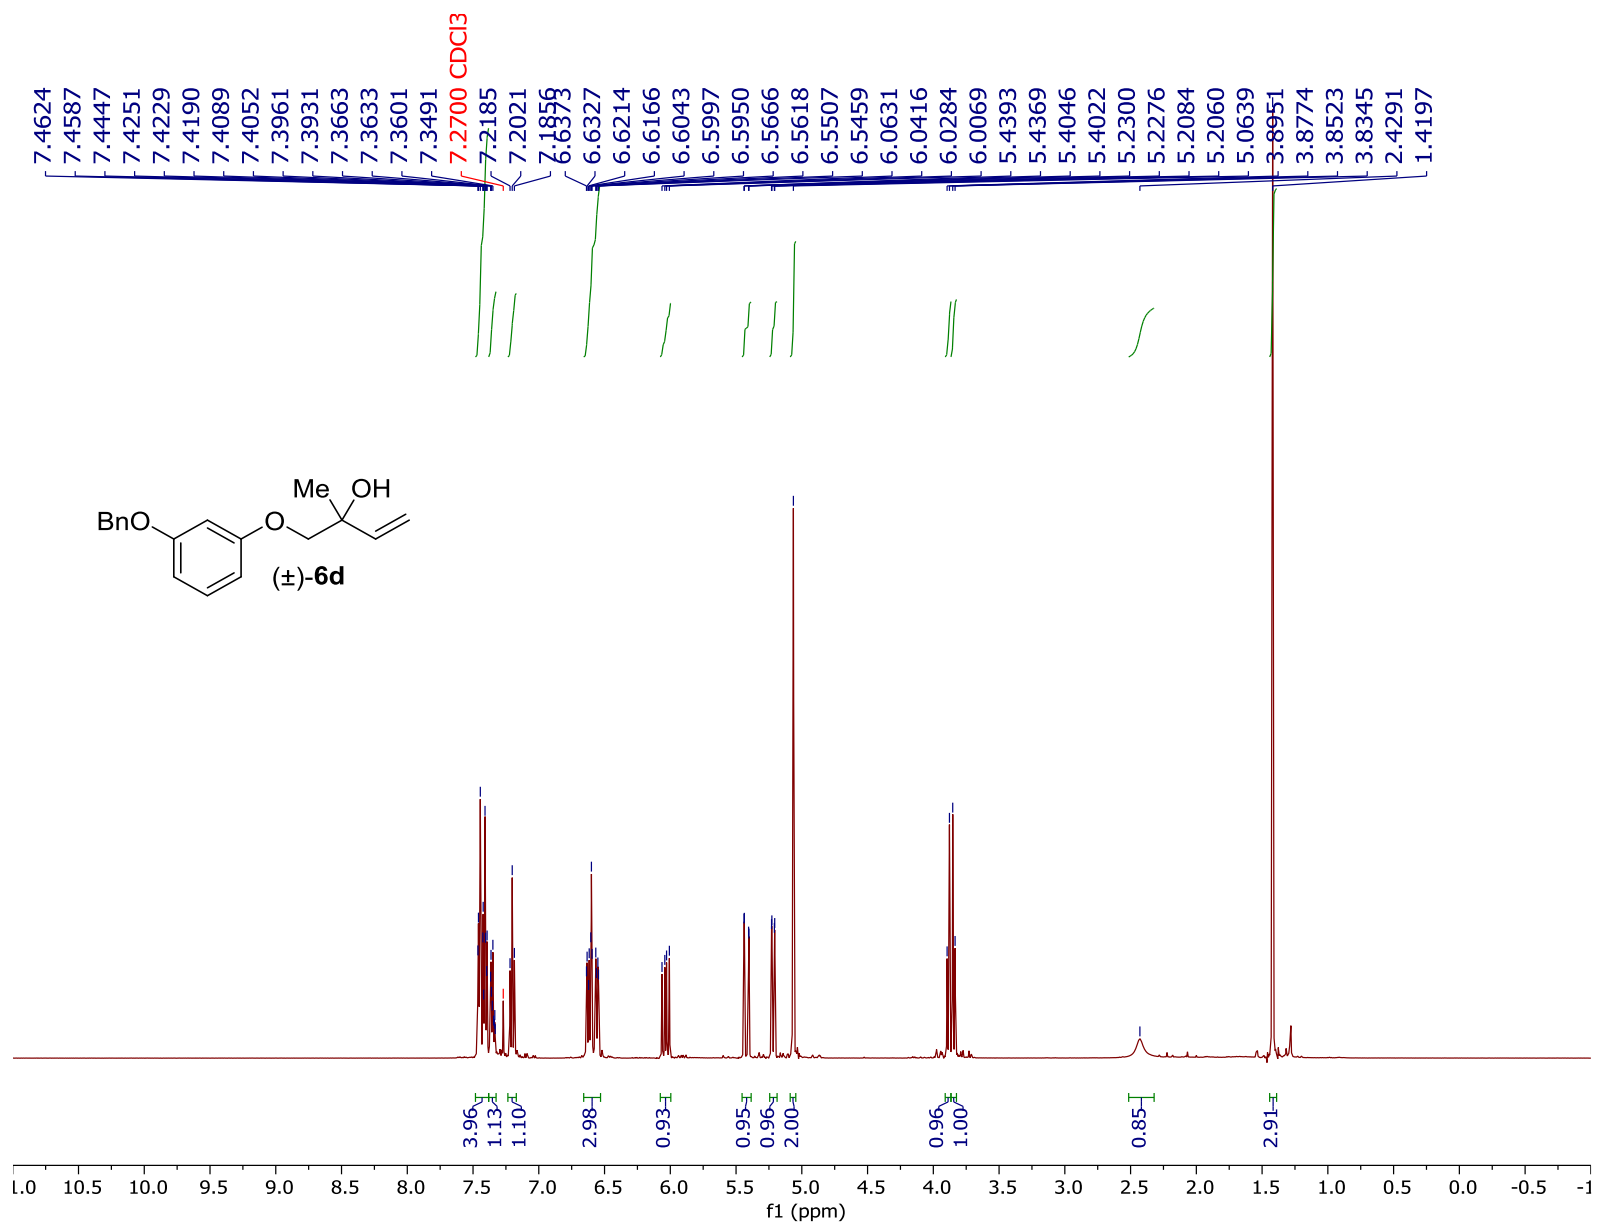

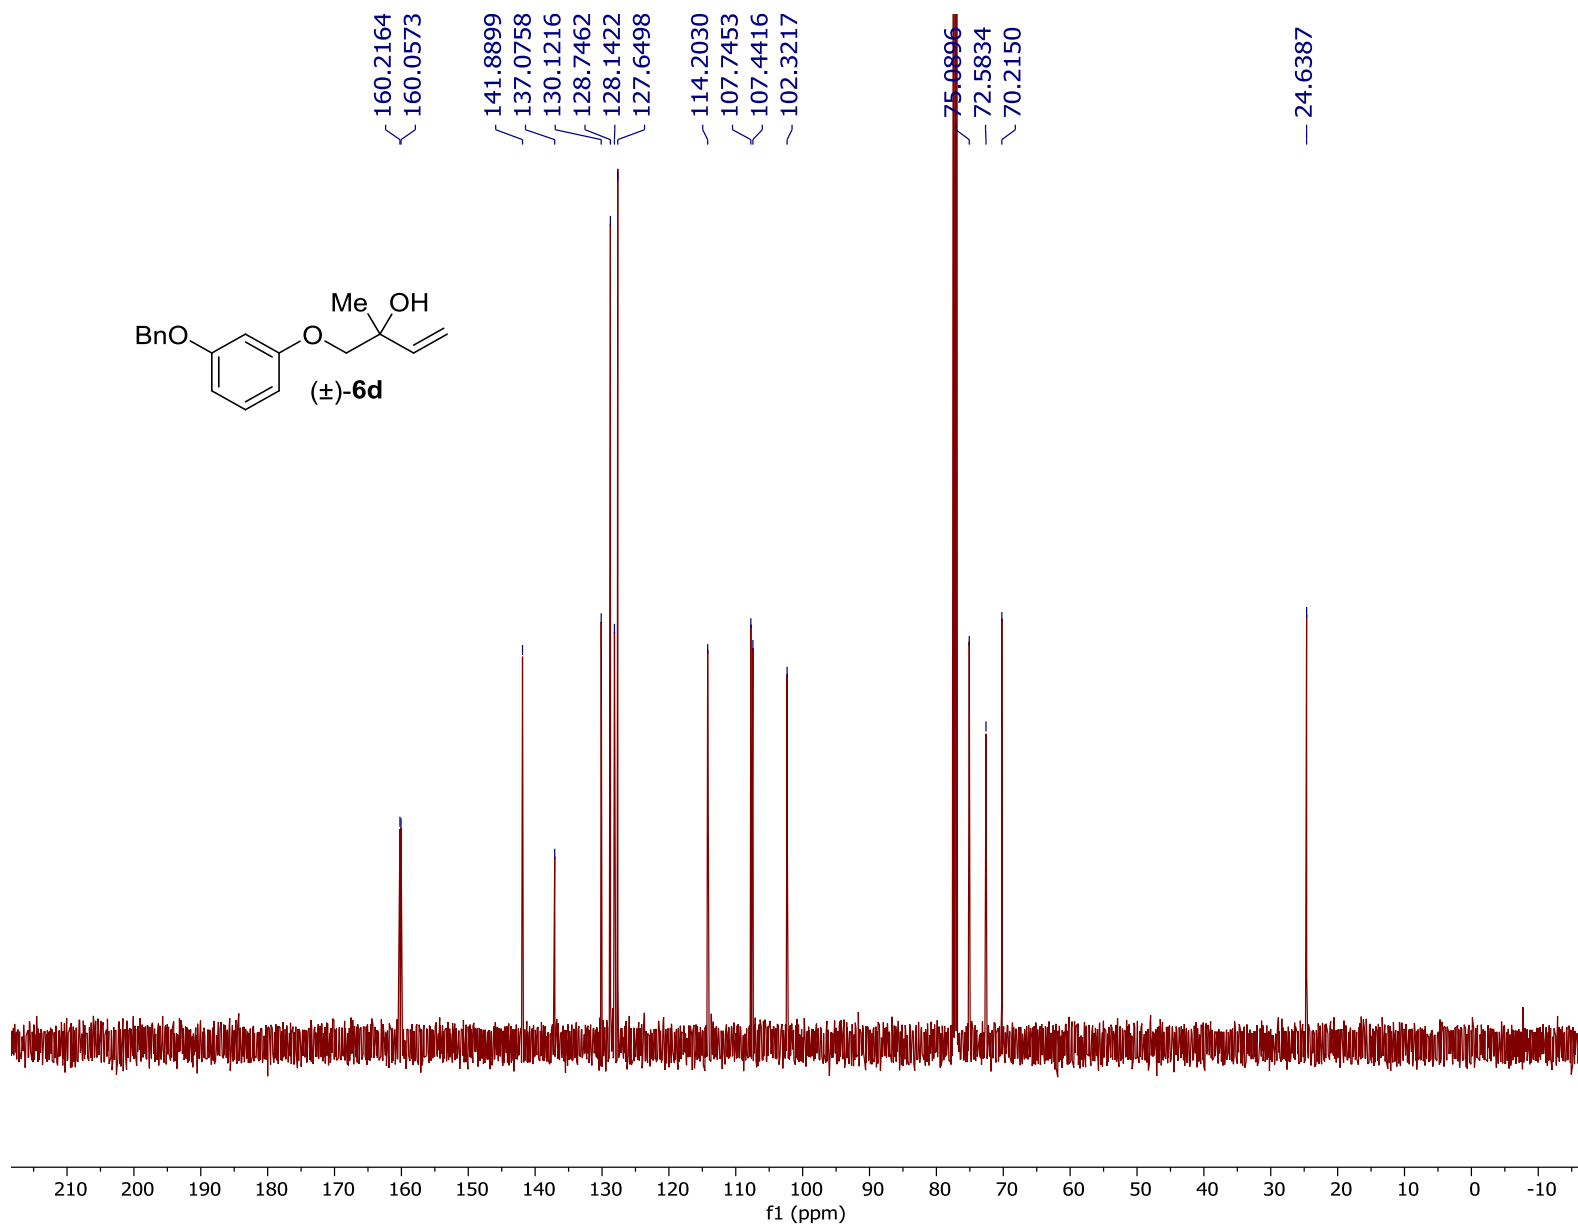

Compound 6d, 126 MHz  $^{13}\text{C}$  NMR Spectrum in  $\text{CDCl}_3$

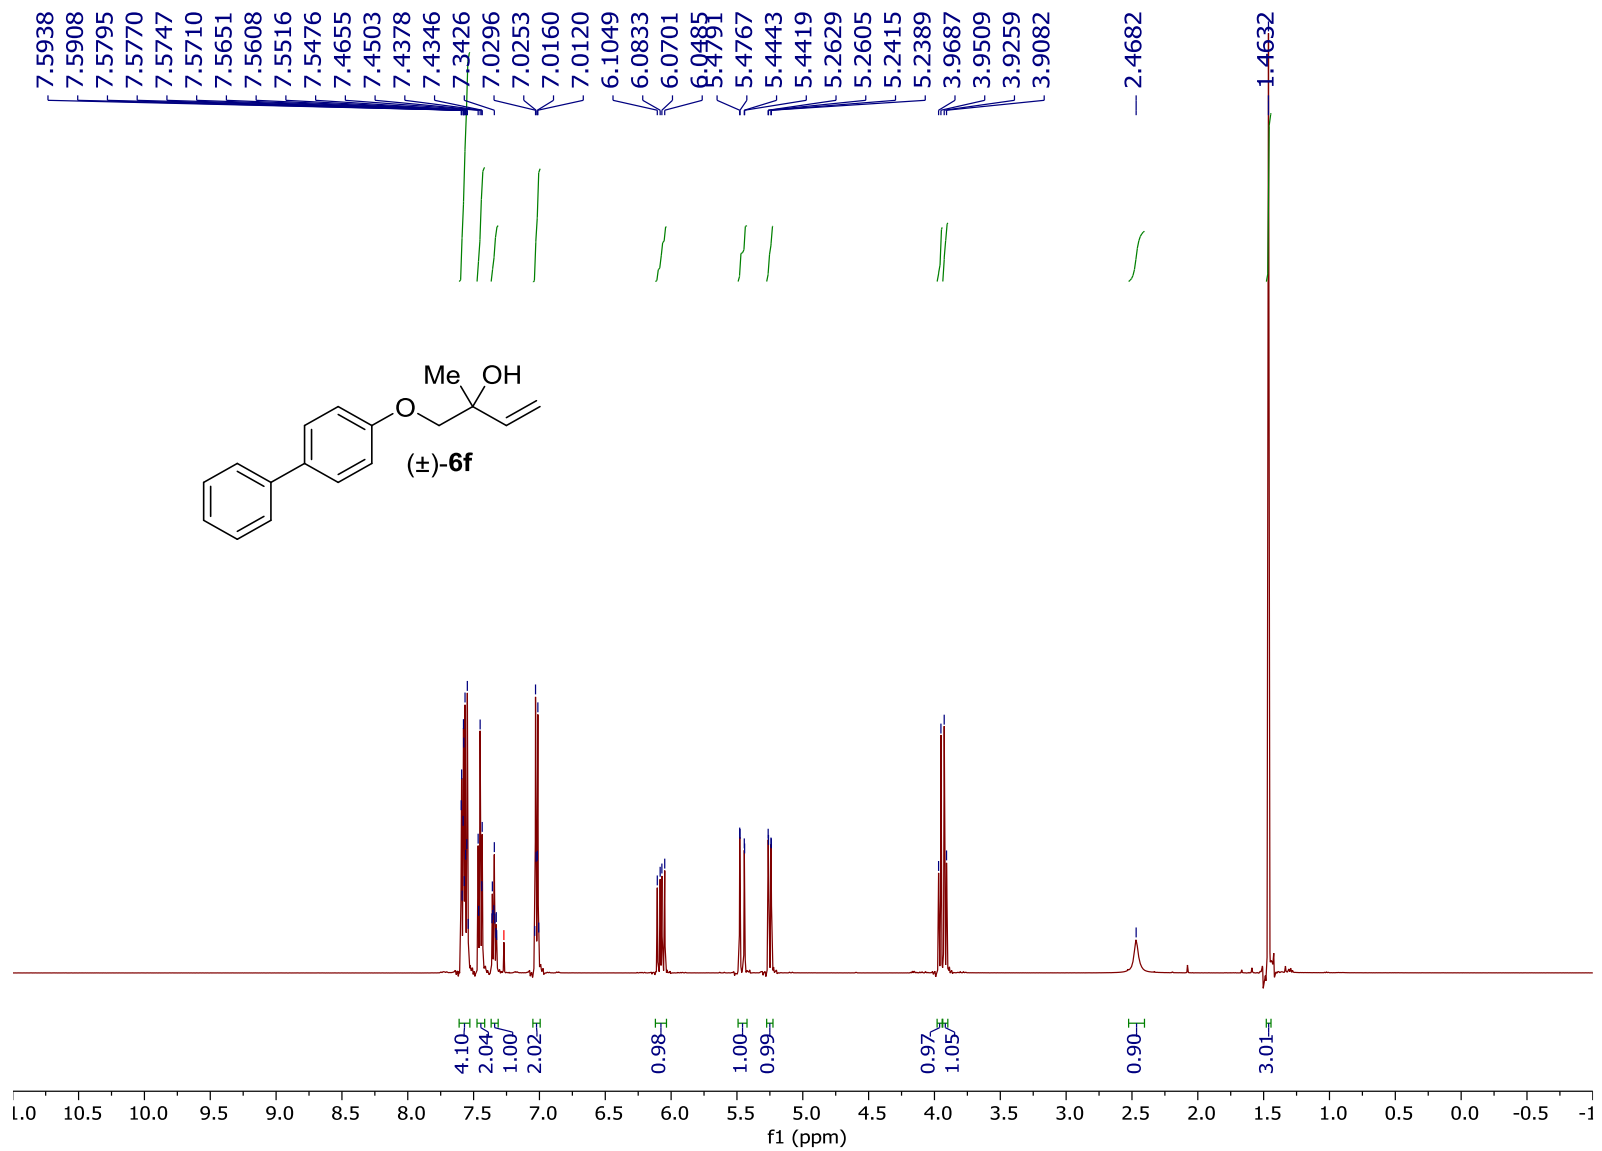

Compound 6f, 500 MHz <sup>1</sup>H NMR Spectrum in CDCl<sub>3</sub>

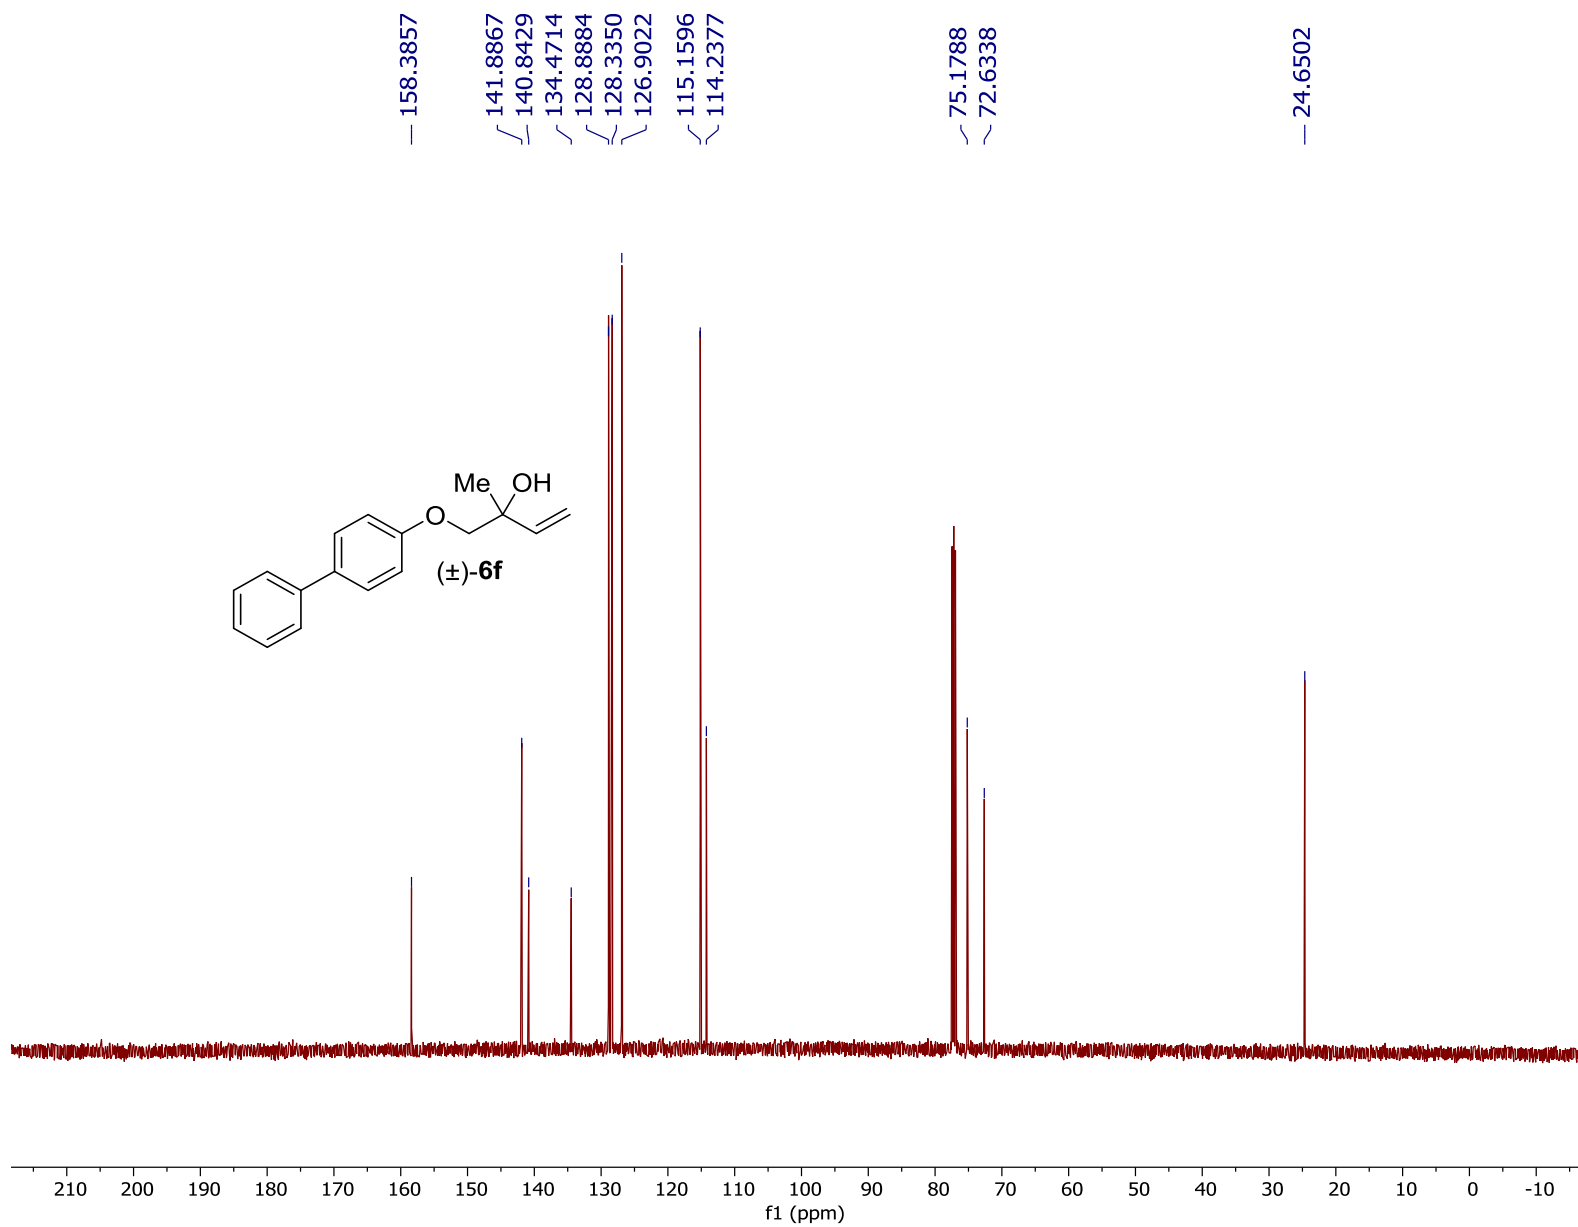

Compound 6f, 126 MHz <sup>13</sup>C NMR Spectrum in CDCl<sub>3</sub>

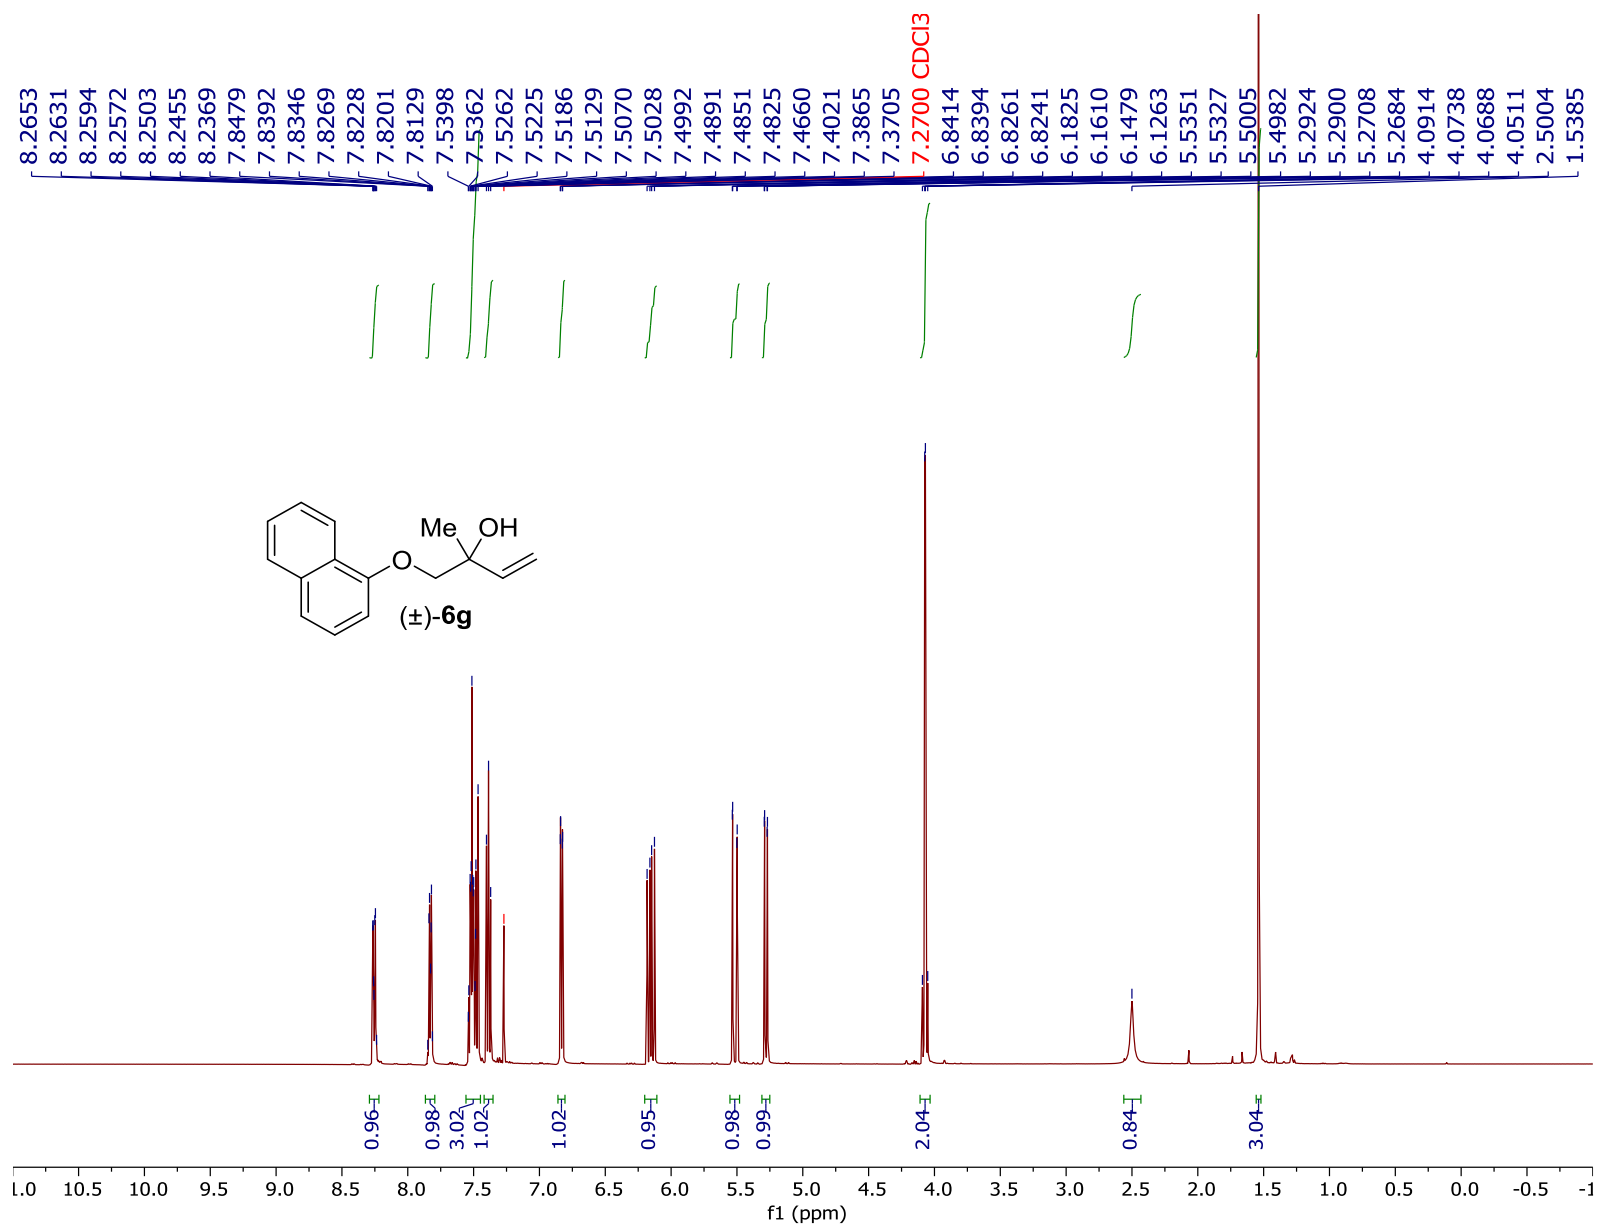

Compound 6g, 500 MHz <sup>1</sup>H NMR Spectrum in CDCl<sub>3</sub>

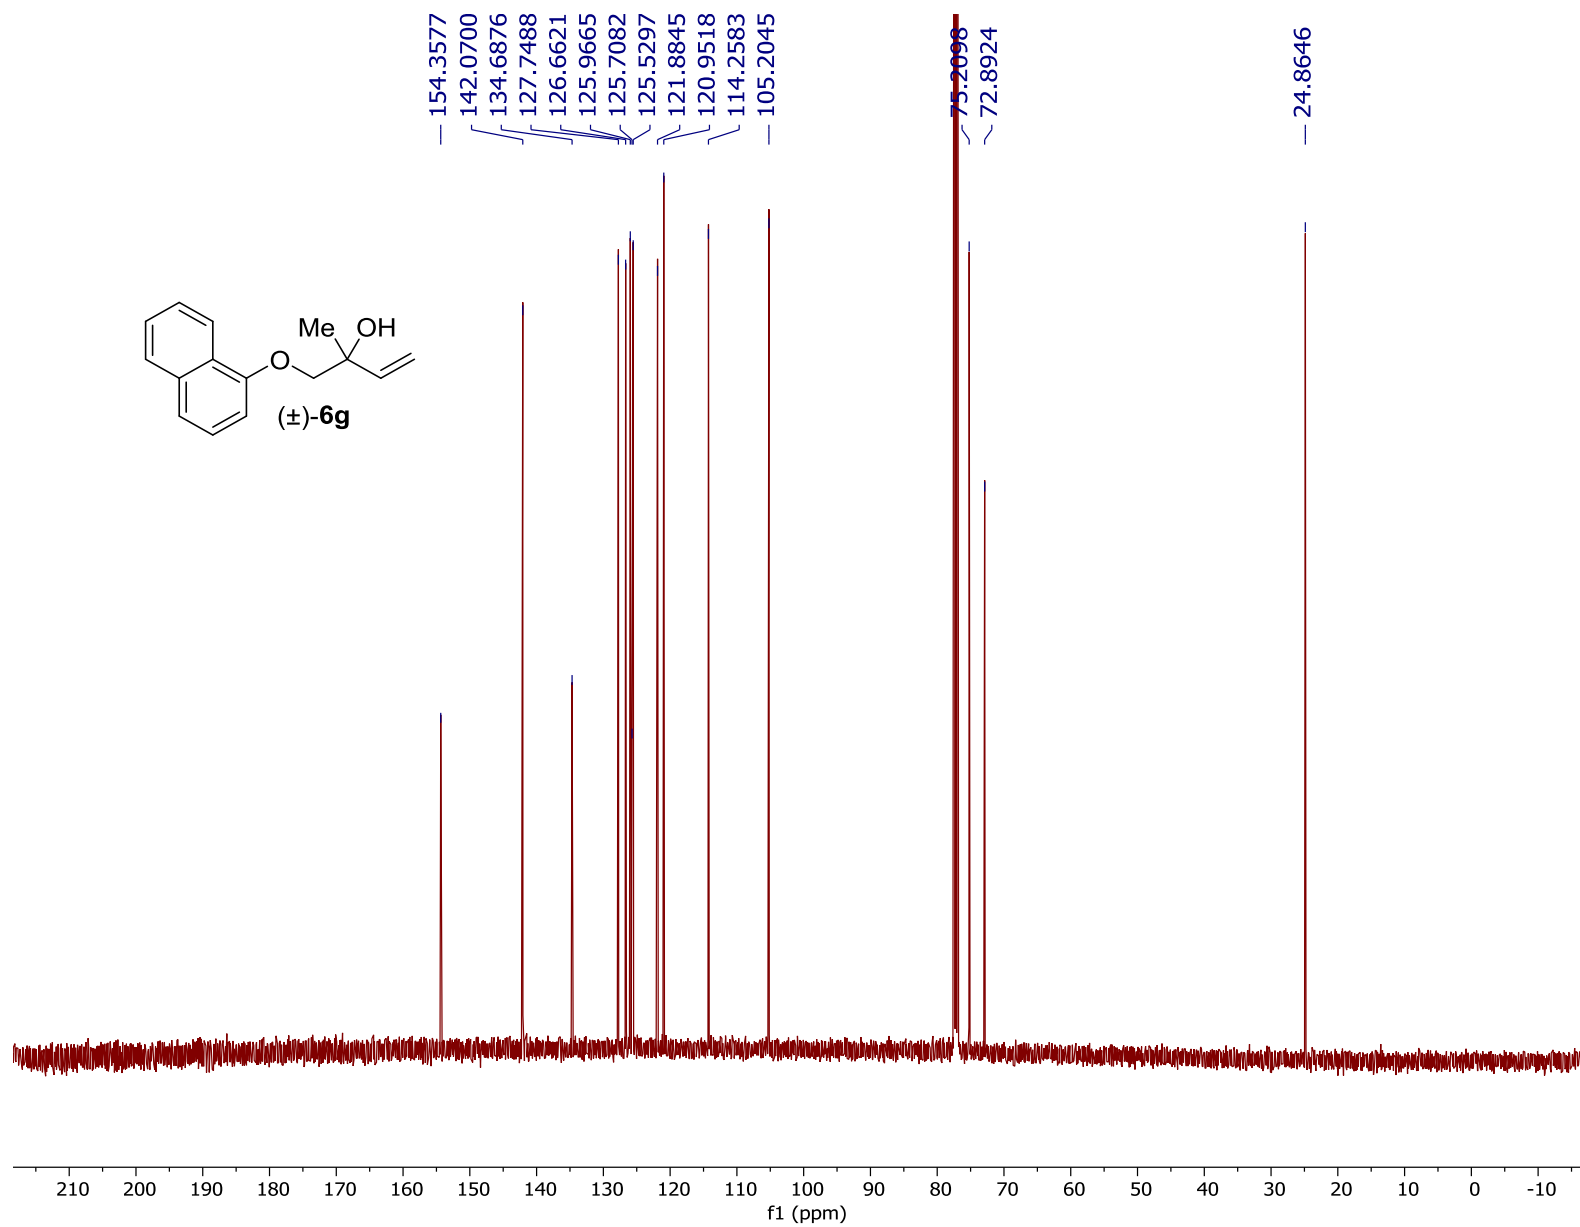

Compound 6g, 126 MHz  $^{13}\text{C}$  NMR Spectrum in  $\text{CDCl}_3$

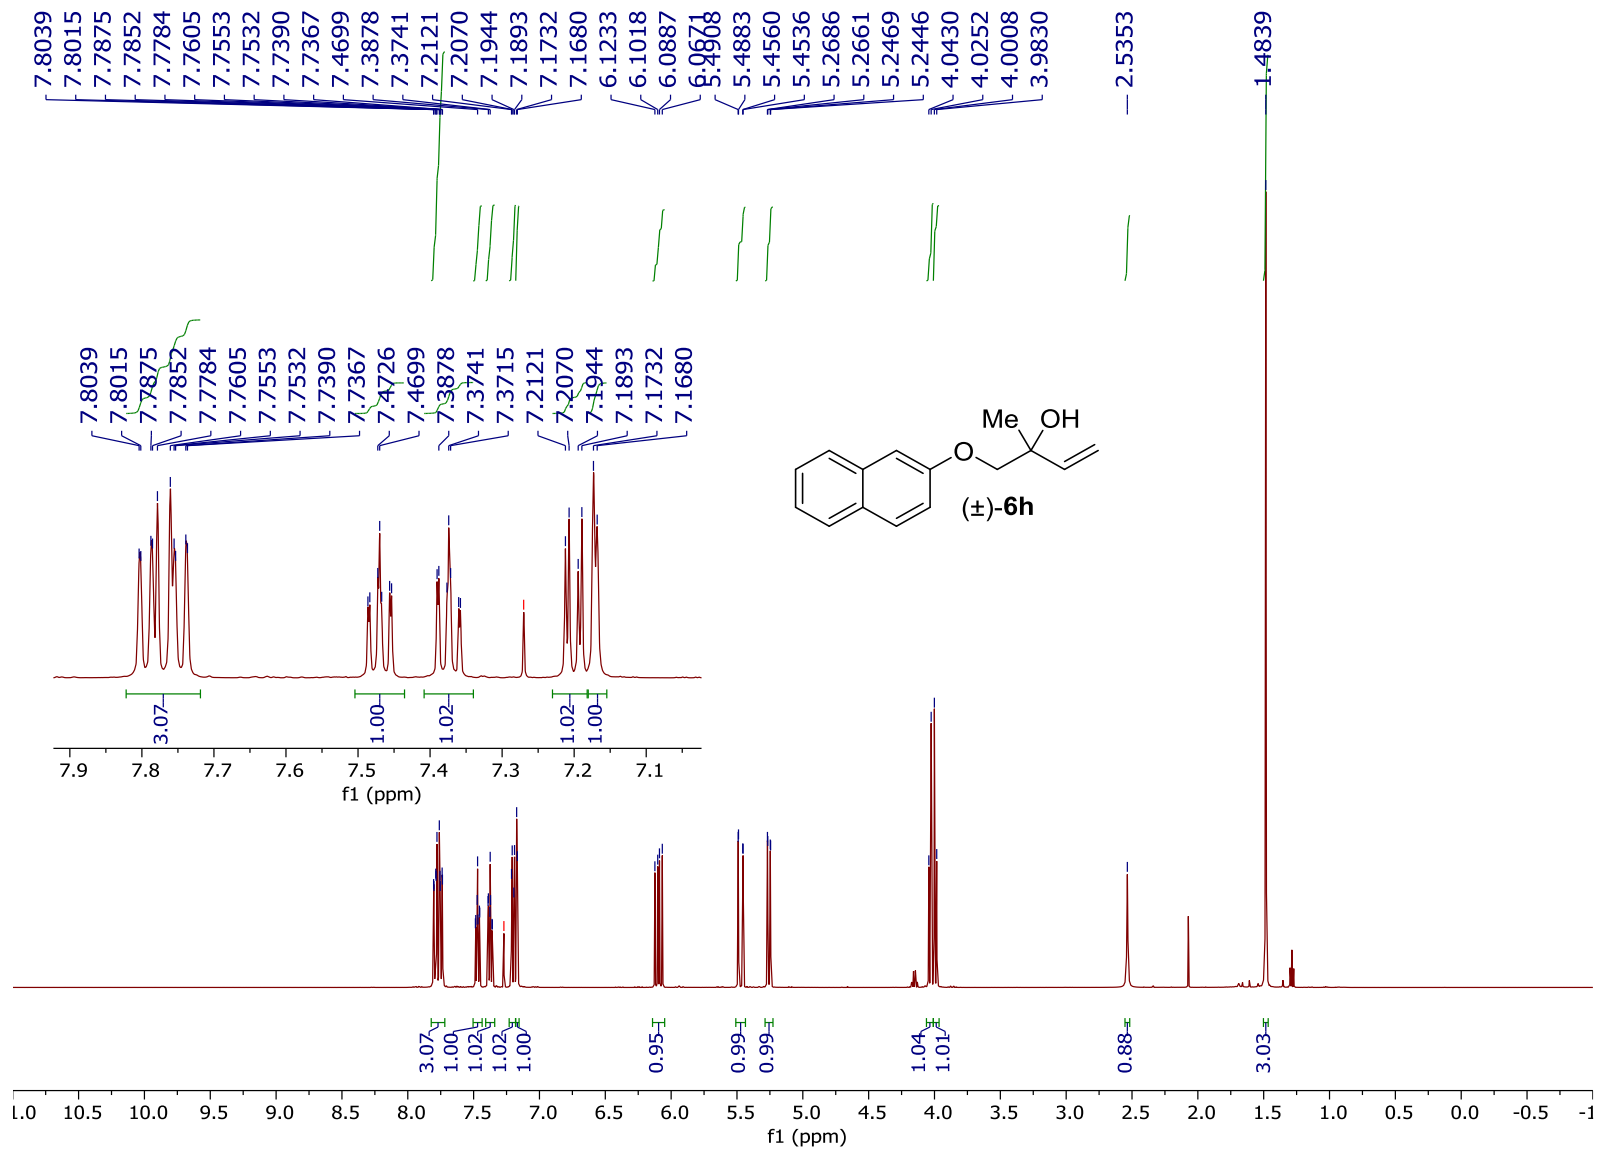

Compound 6h, 500 MHz <sup>1</sup>H NMR Spectrum in CDCl<sub>3</sub>



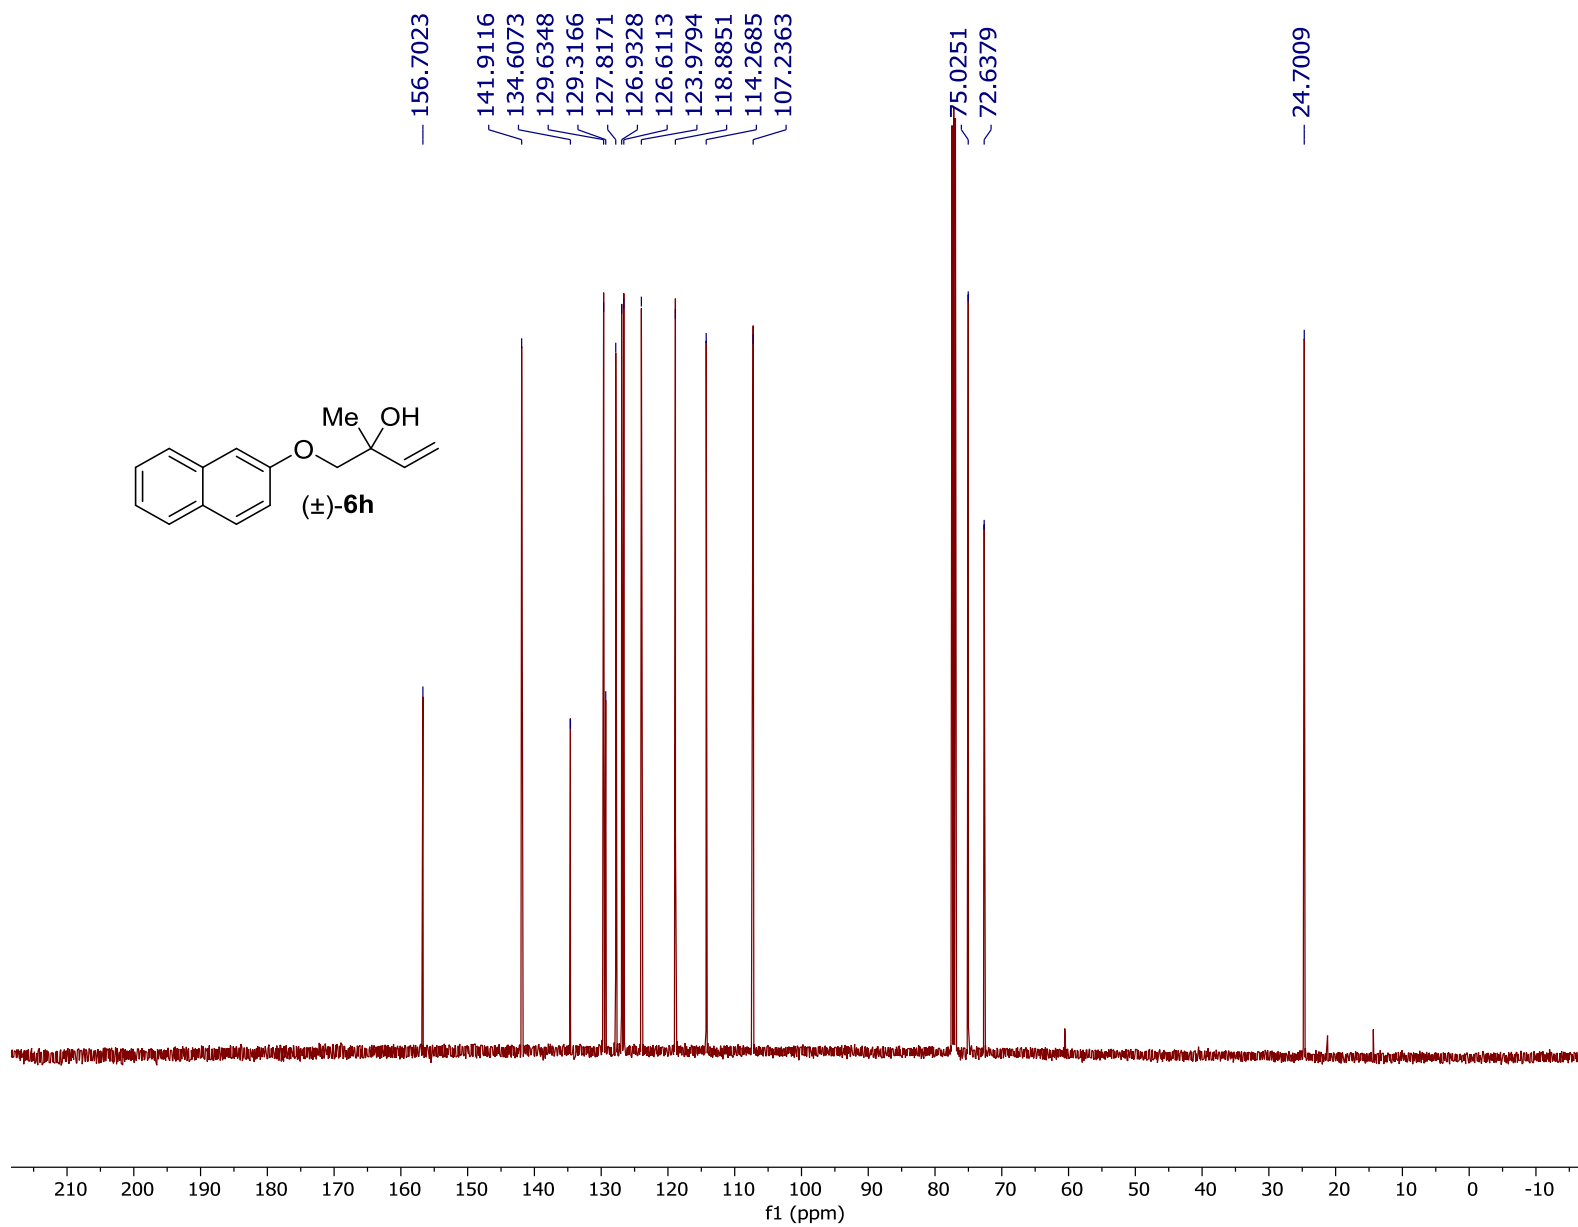

Compound 6h, 126 MHz  $^{13}\text{C}$  NMR Spectrum in  $\text{CDCl}_3$

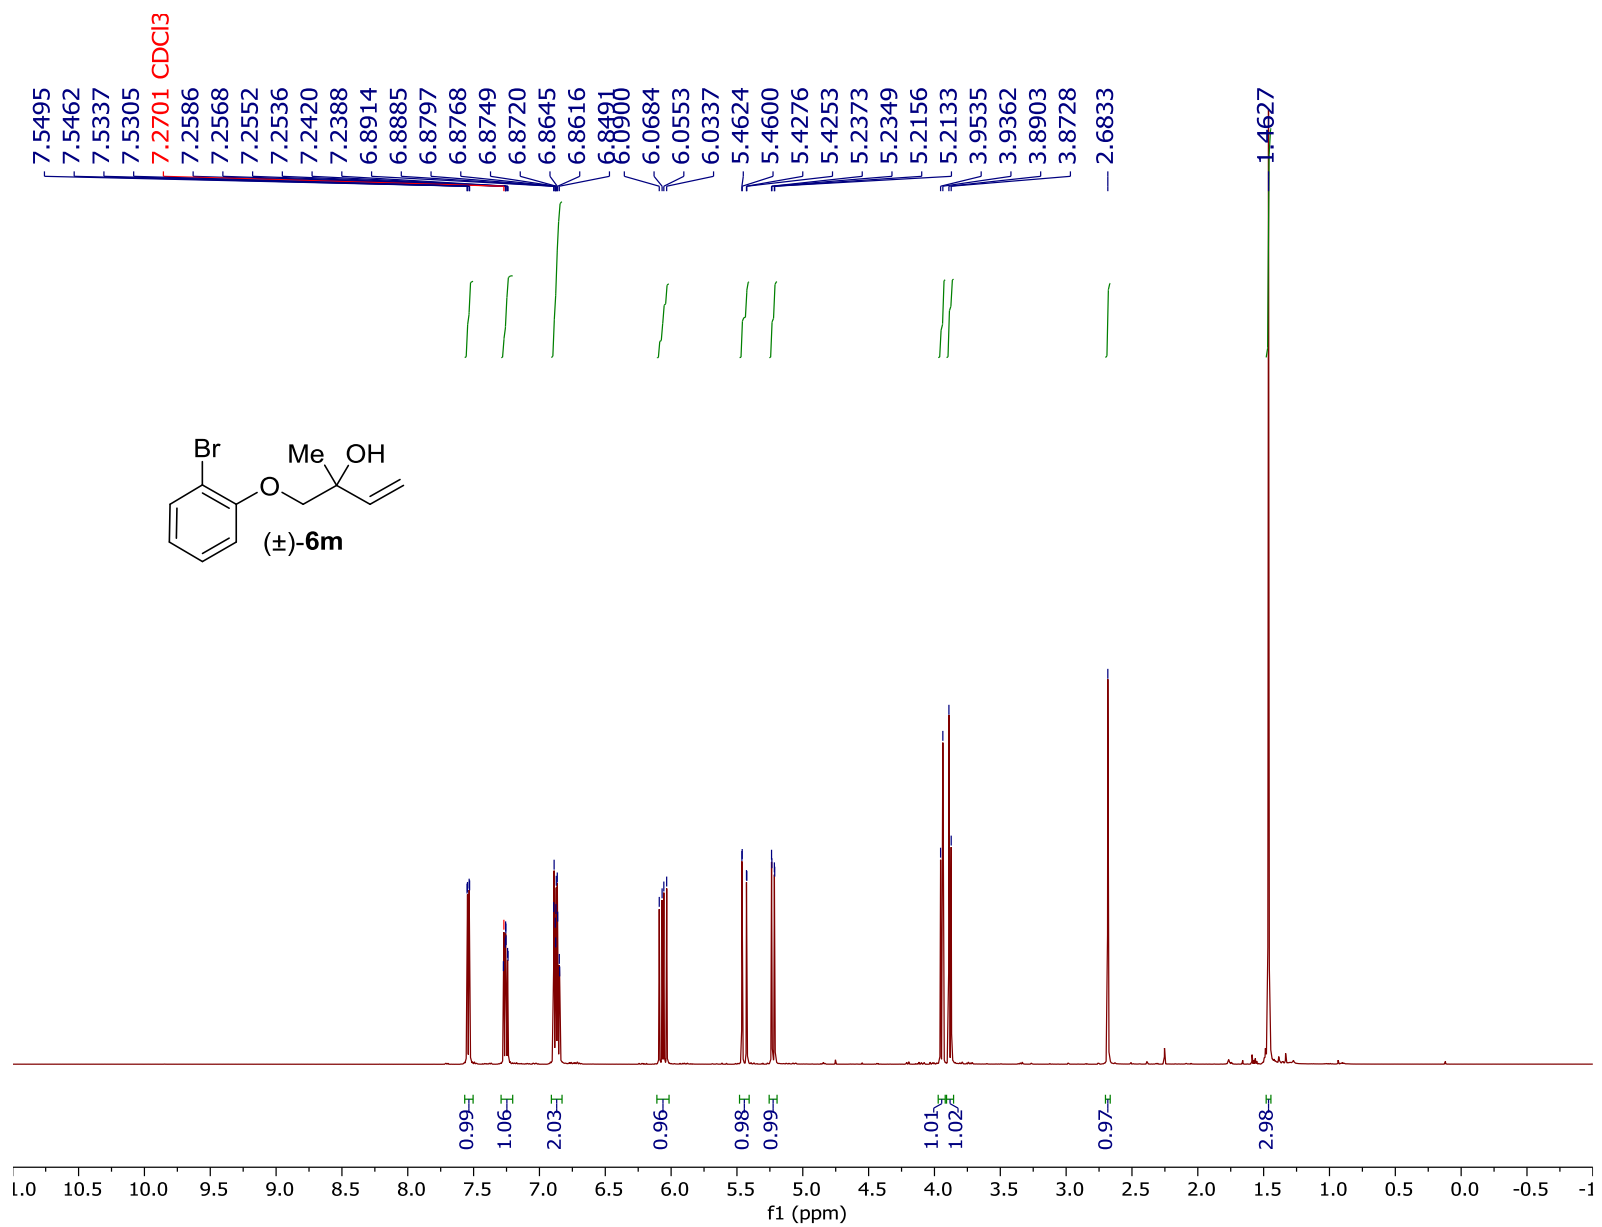

Compound 6m, 500 MHz <sup>1</sup>H NMR Spectrum in CDCl<sub>3</sub>

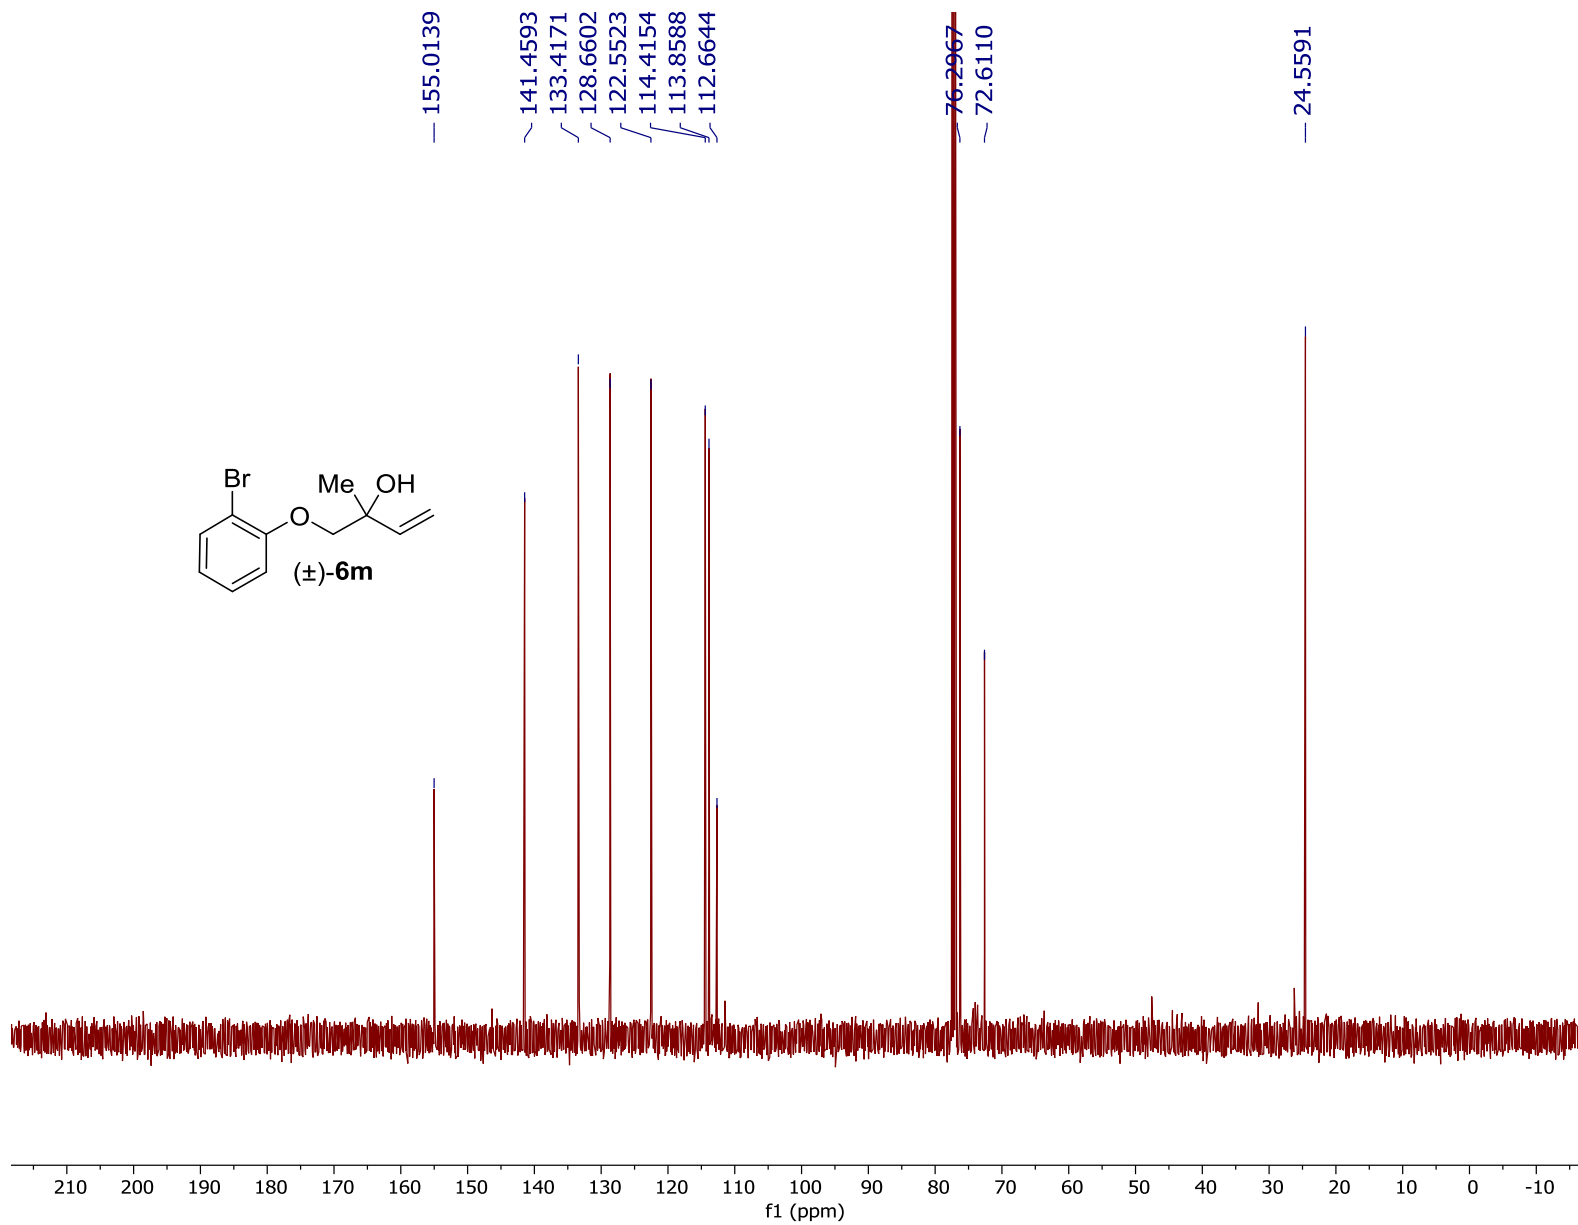

Compound 6m, 126 MHz  $^{13}\text{C}$  NMR Spectrum in  $\text{CDCl}_3$

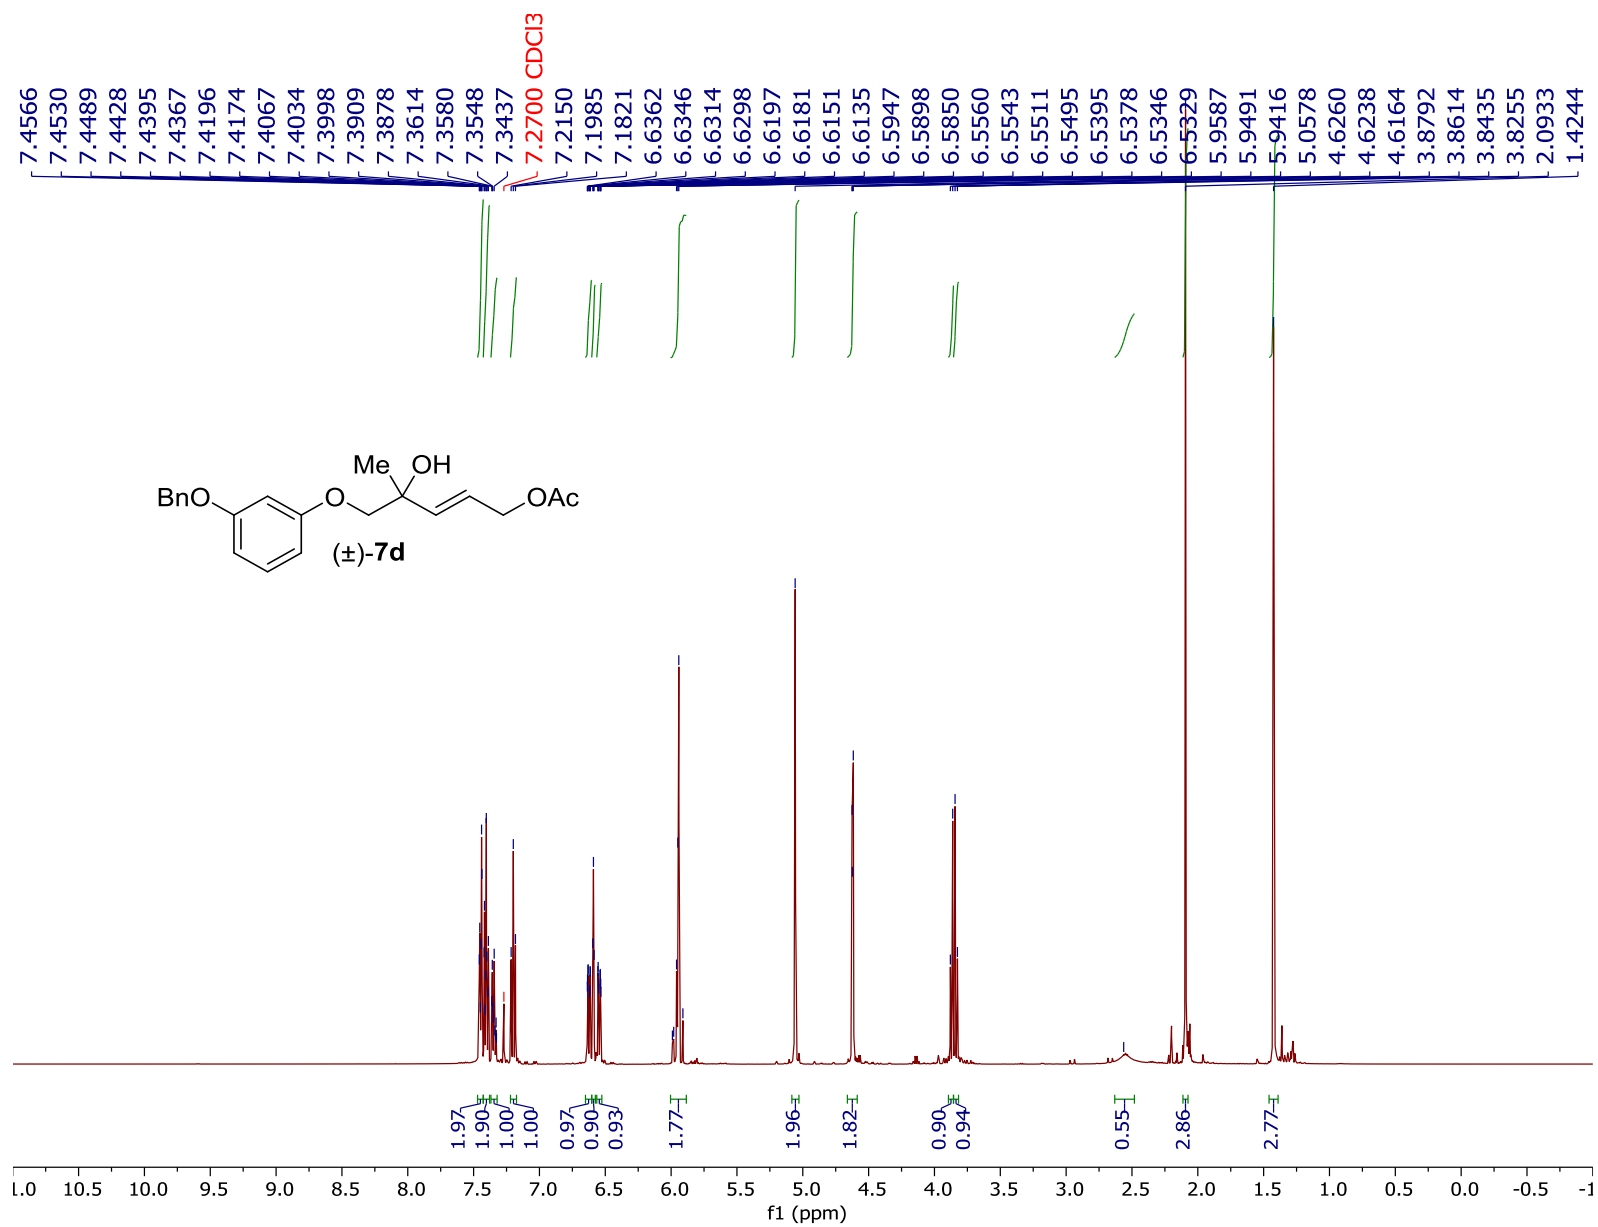

Compound 7d, 500 MHz <sup>1</sup>H NMR Spectrum in CDCl<sub>3</sub>

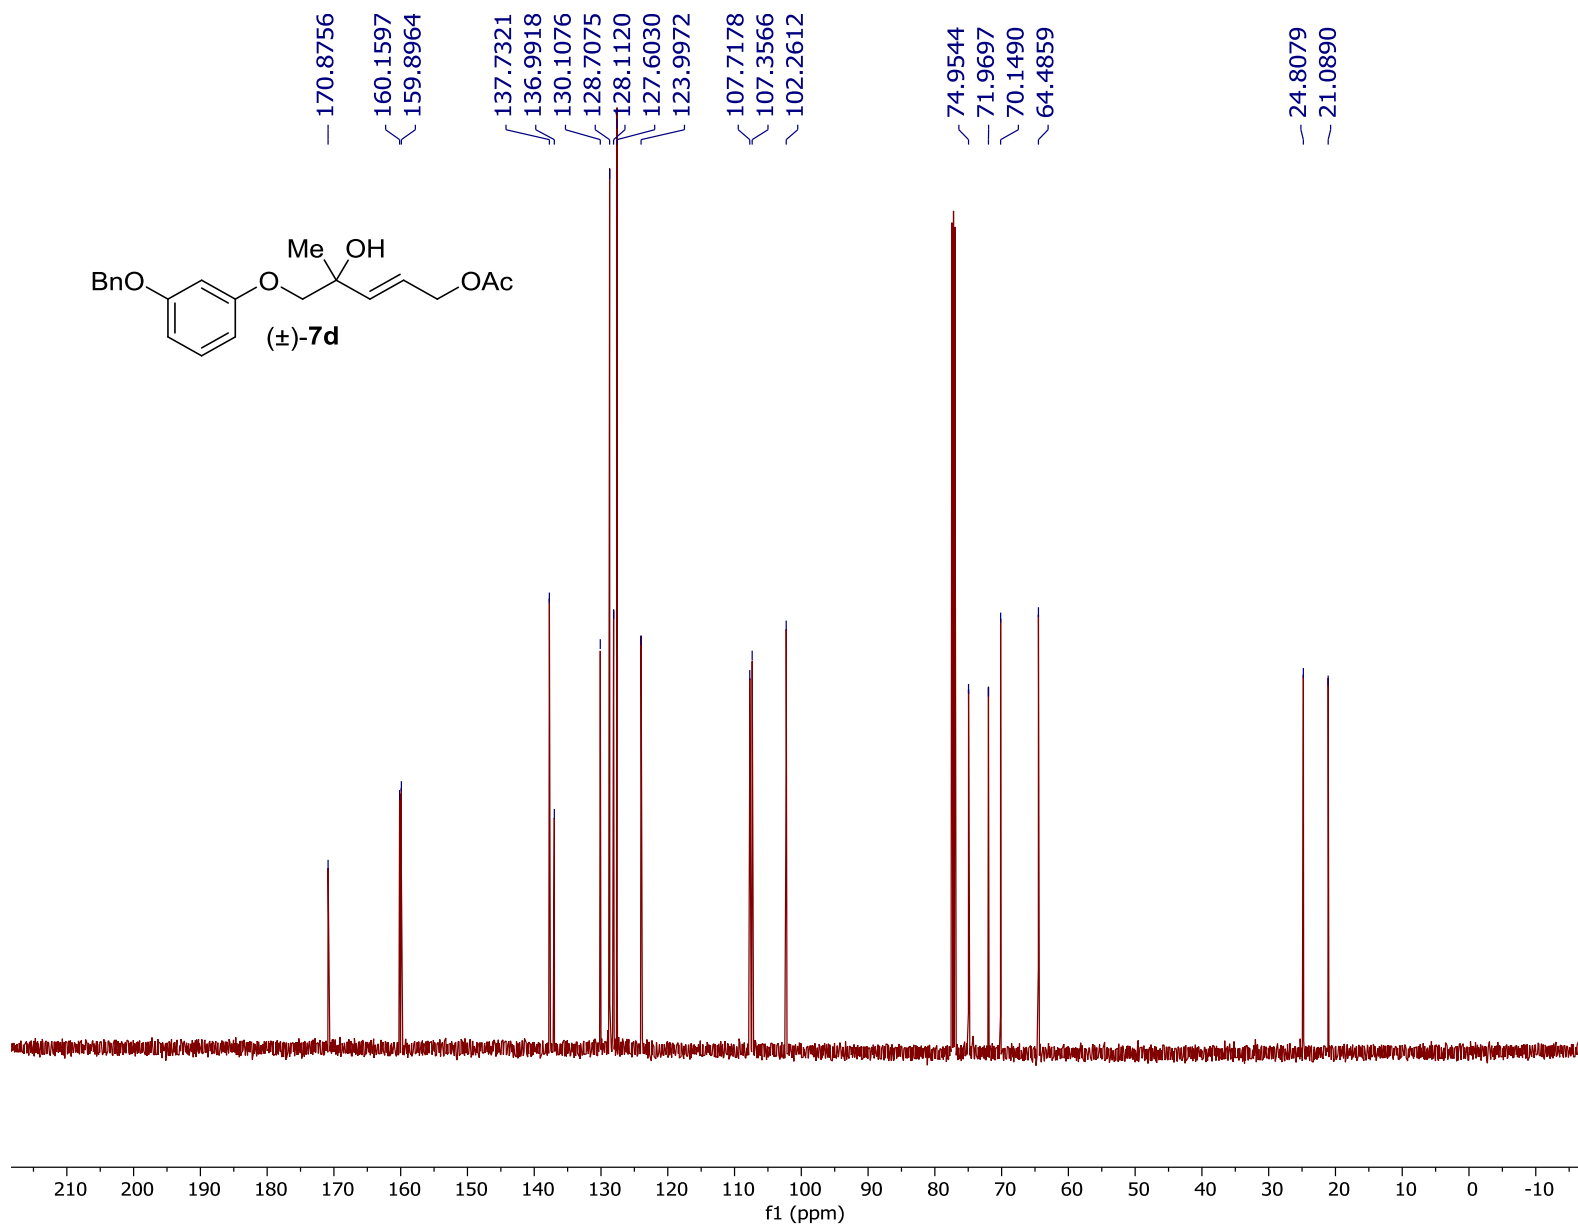

Compound 7d, 126 MHz  $^{13}\text{C}$  NMR Spectrum in  $\text{CDCl}_3$

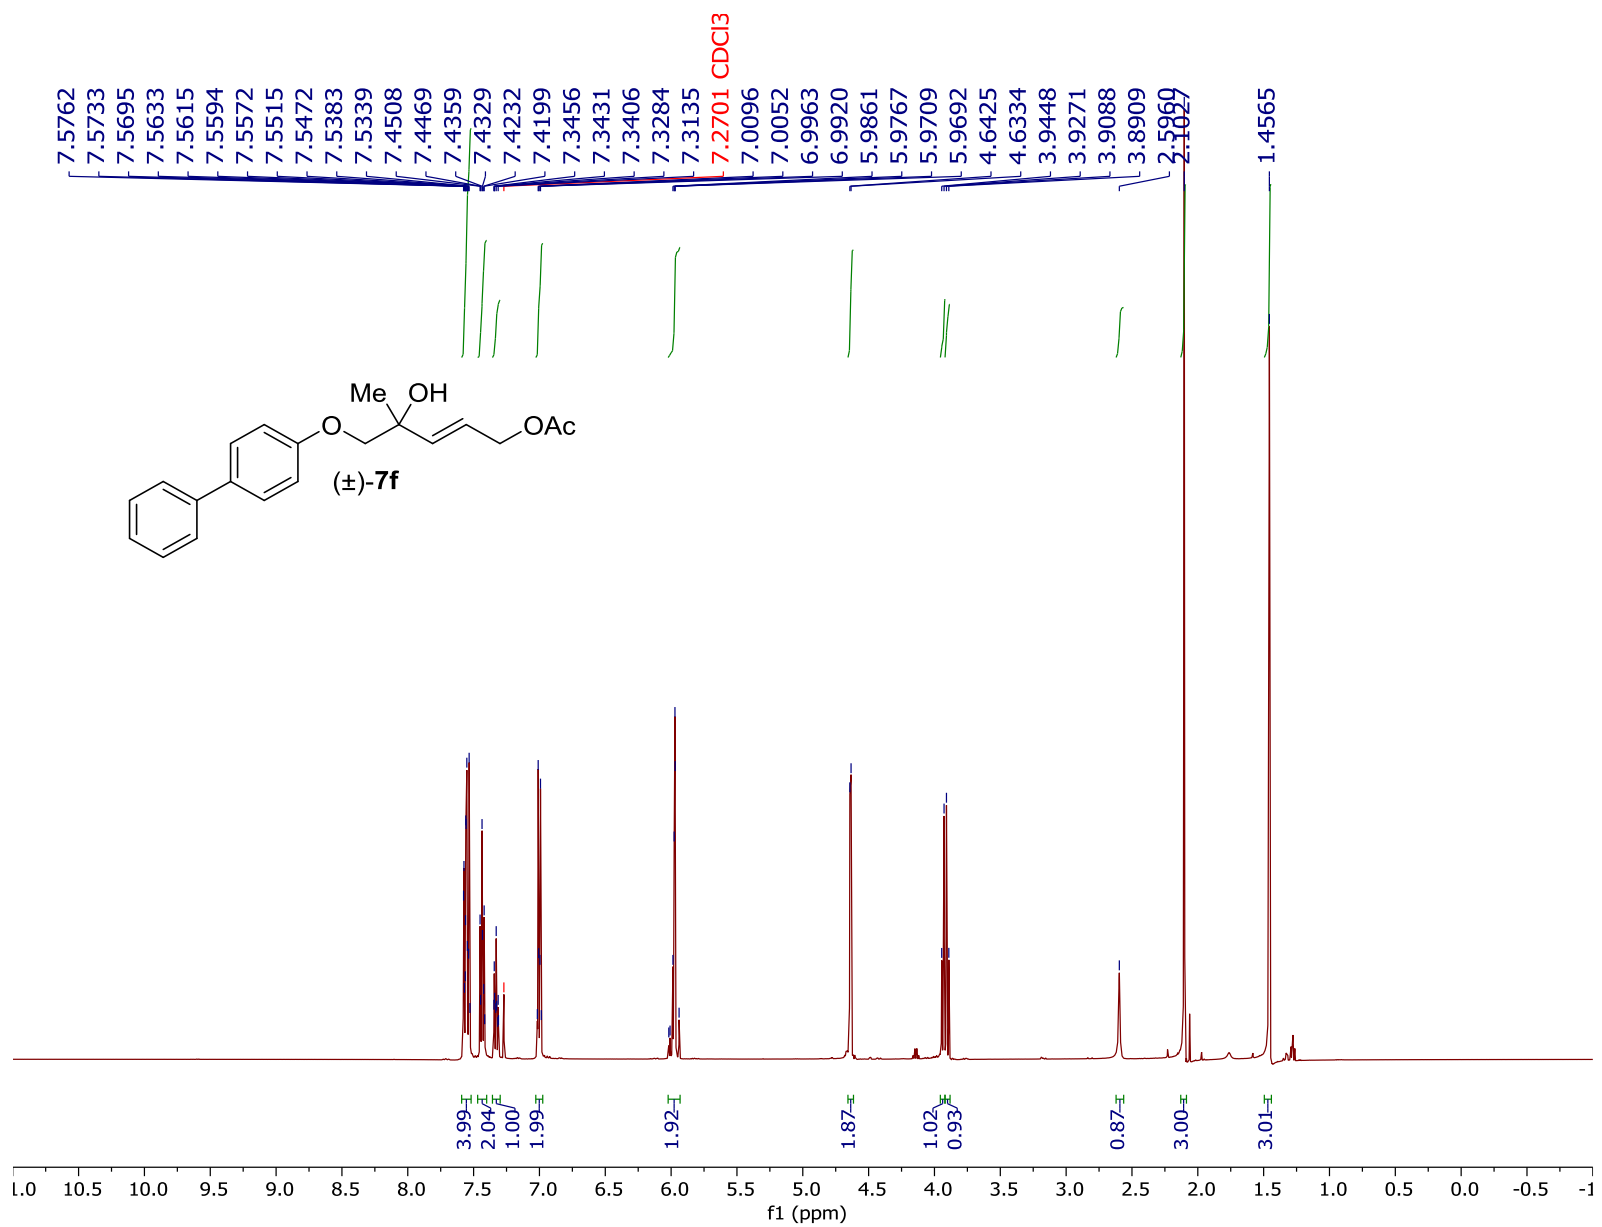

Compound 7f, 500 MHz <sup>1</sup>H NMR Spectrum in CDCl<sub>3</sub>

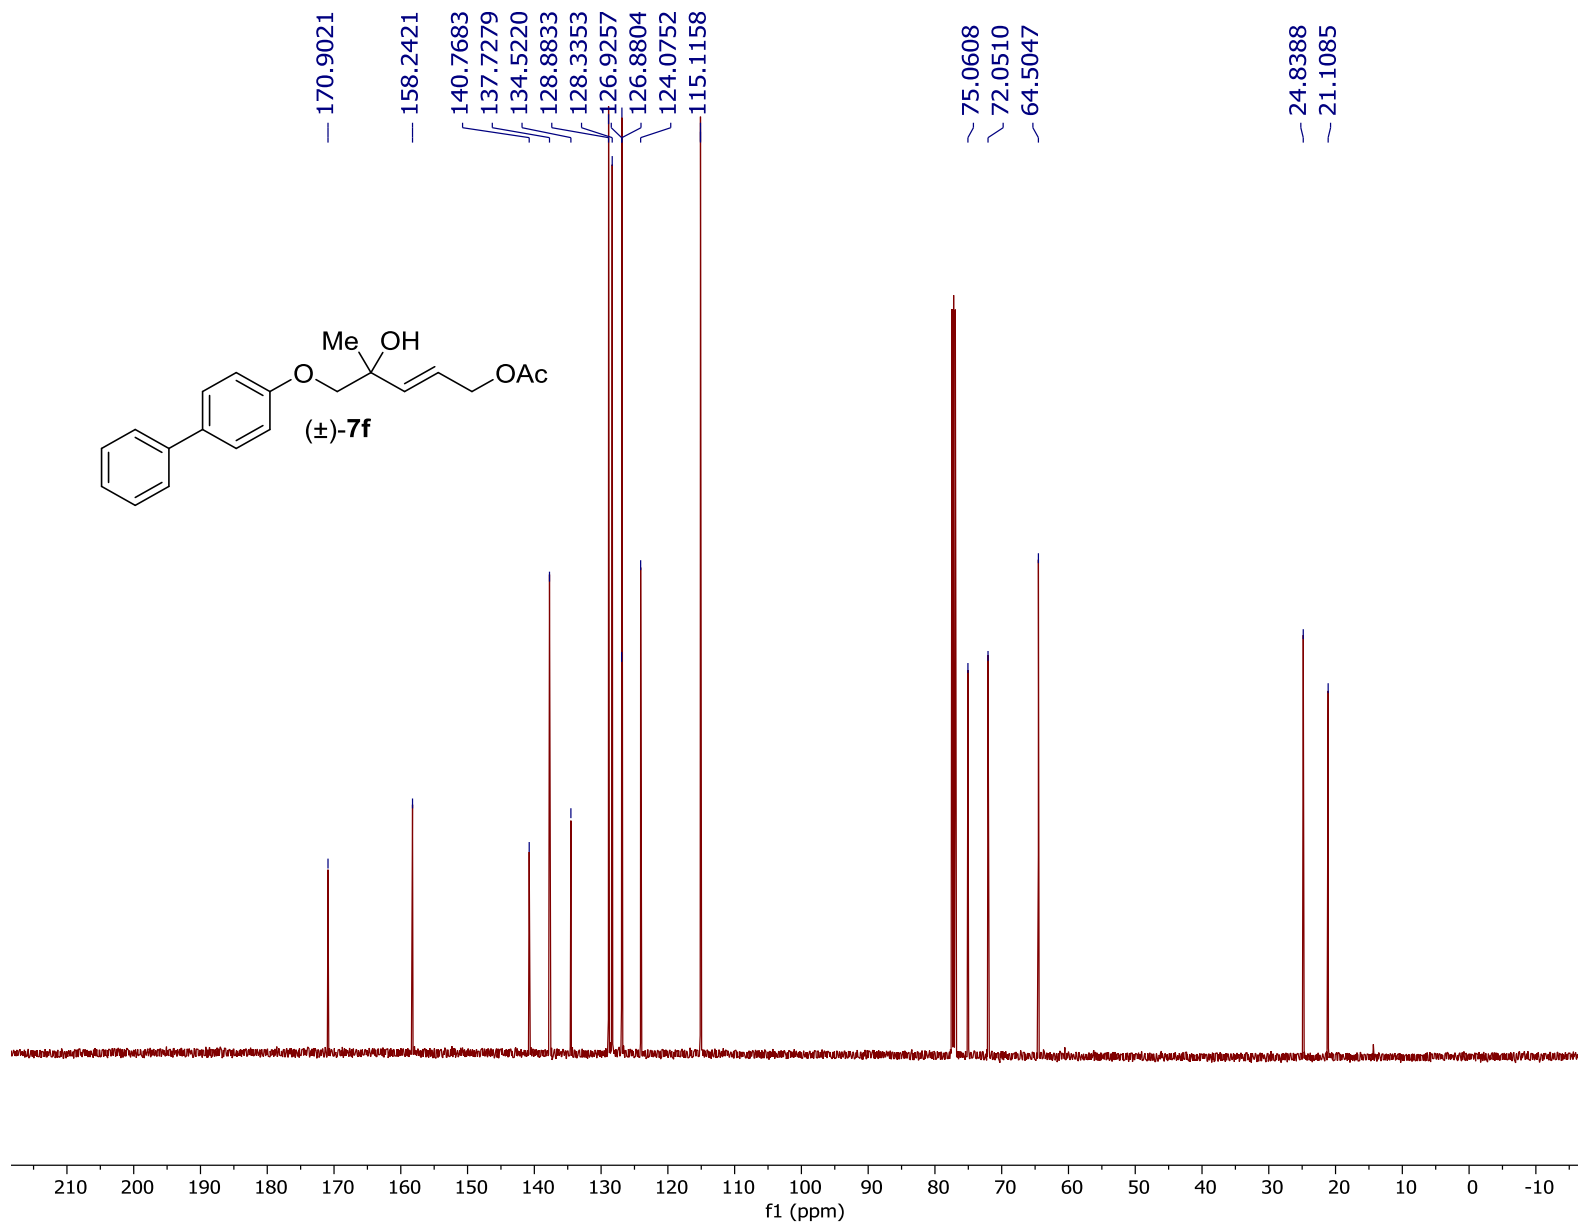

Compound 7f, 126 MHz  $^{13}\text{C}$  NMR Spectrum in  $\text{CDCl}_3$

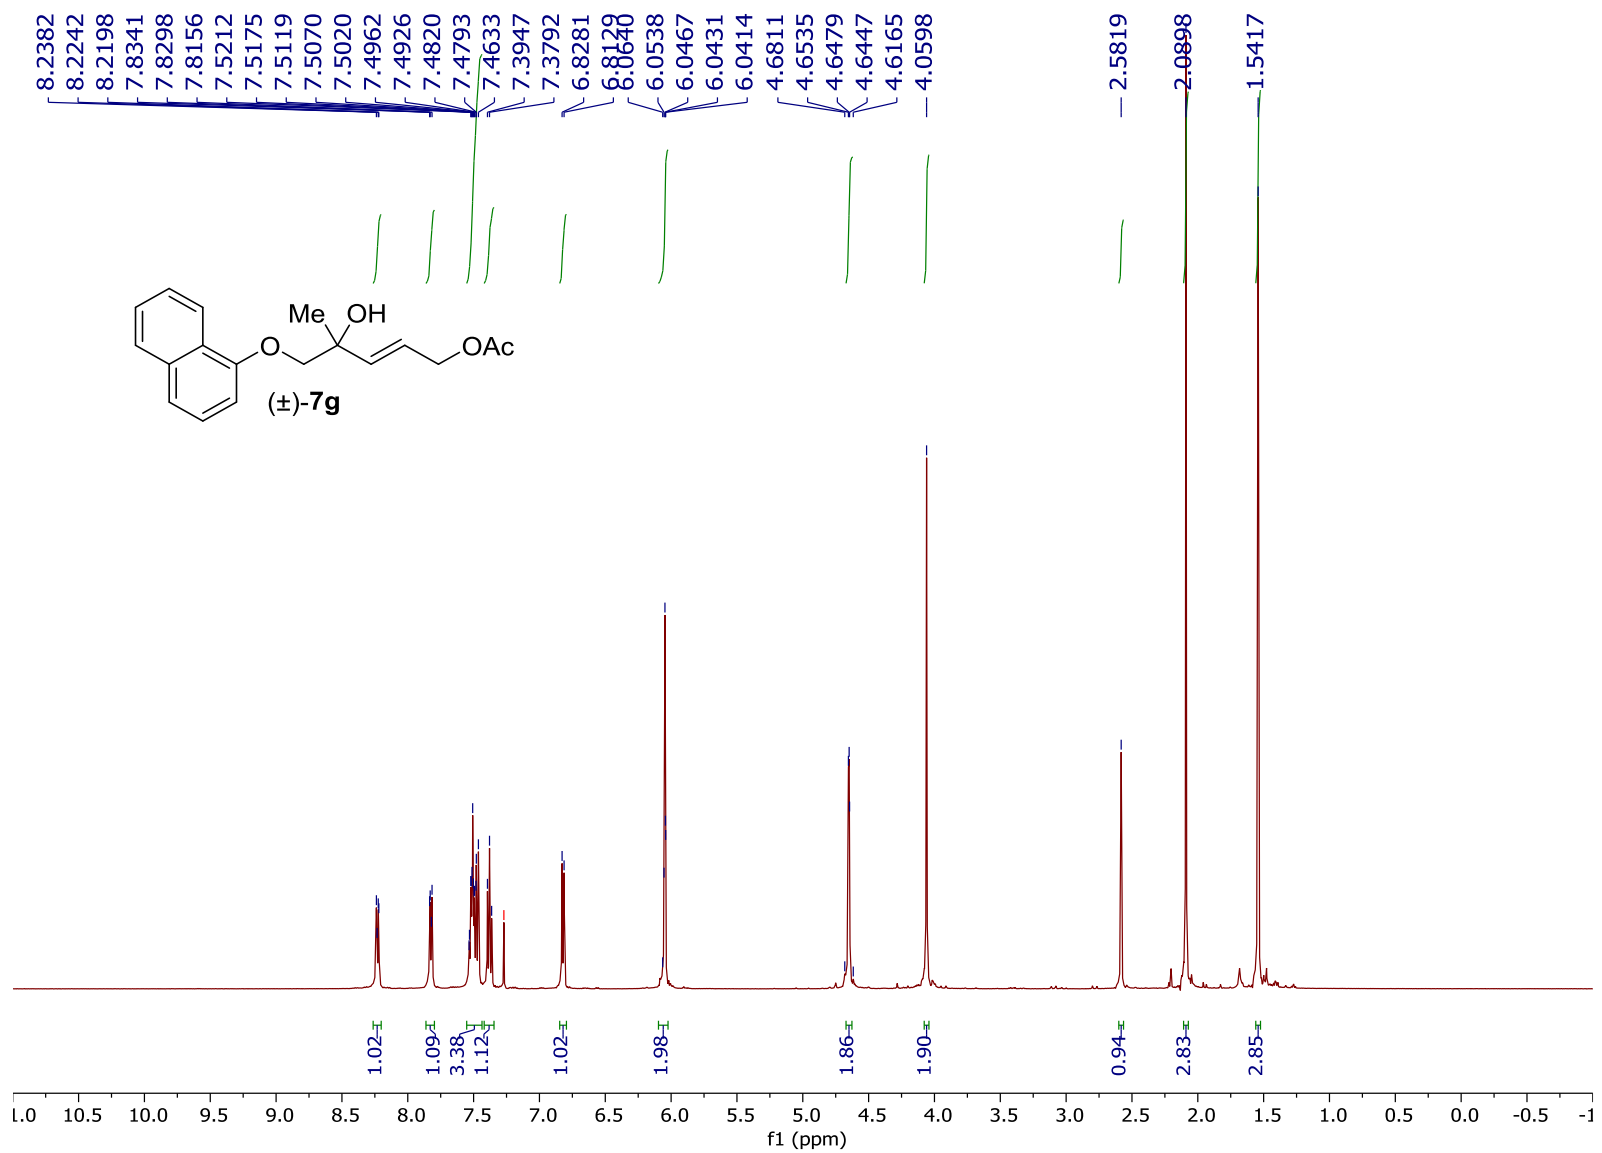

Compound 7g, 500 MHz <sup>1</sup>H NMR Spectrum in CDCl<sub>3</sub>



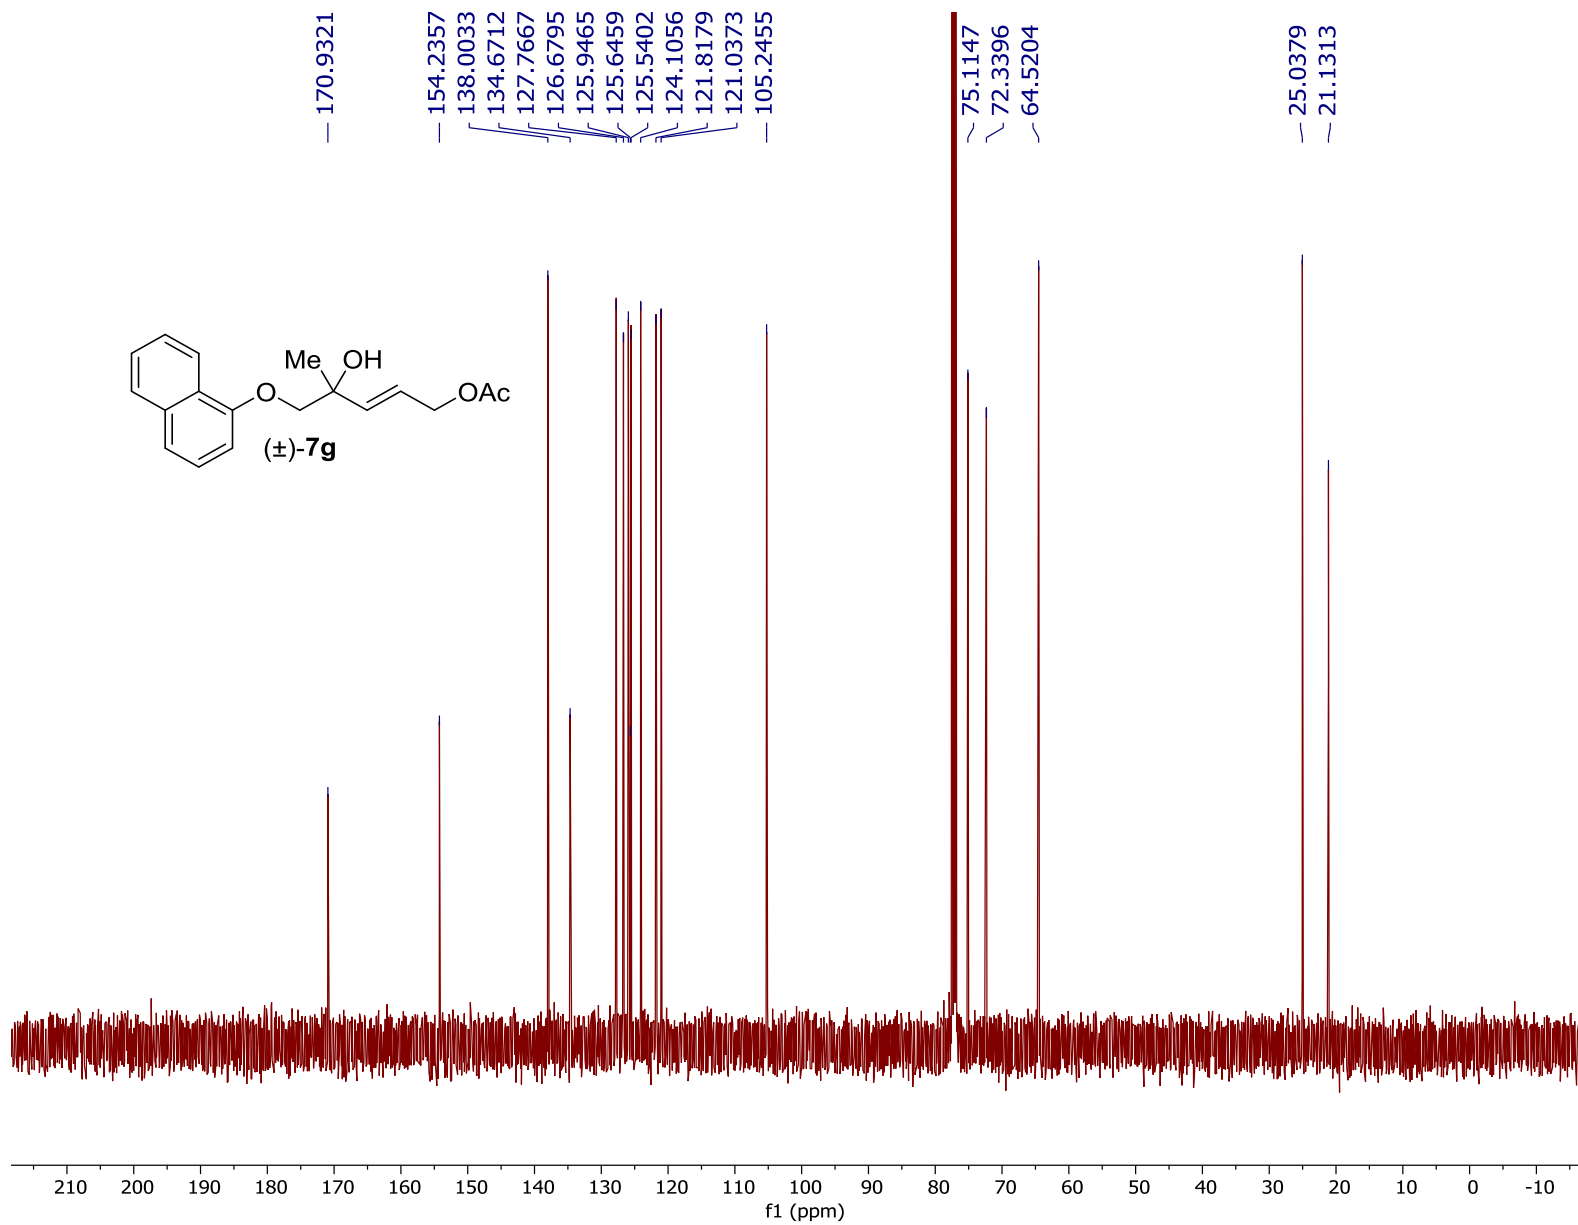

Compound 7g, 126 MHz  $^{13}\text{C}$  NMR Spectrum in  $\text{CDCl}_3$

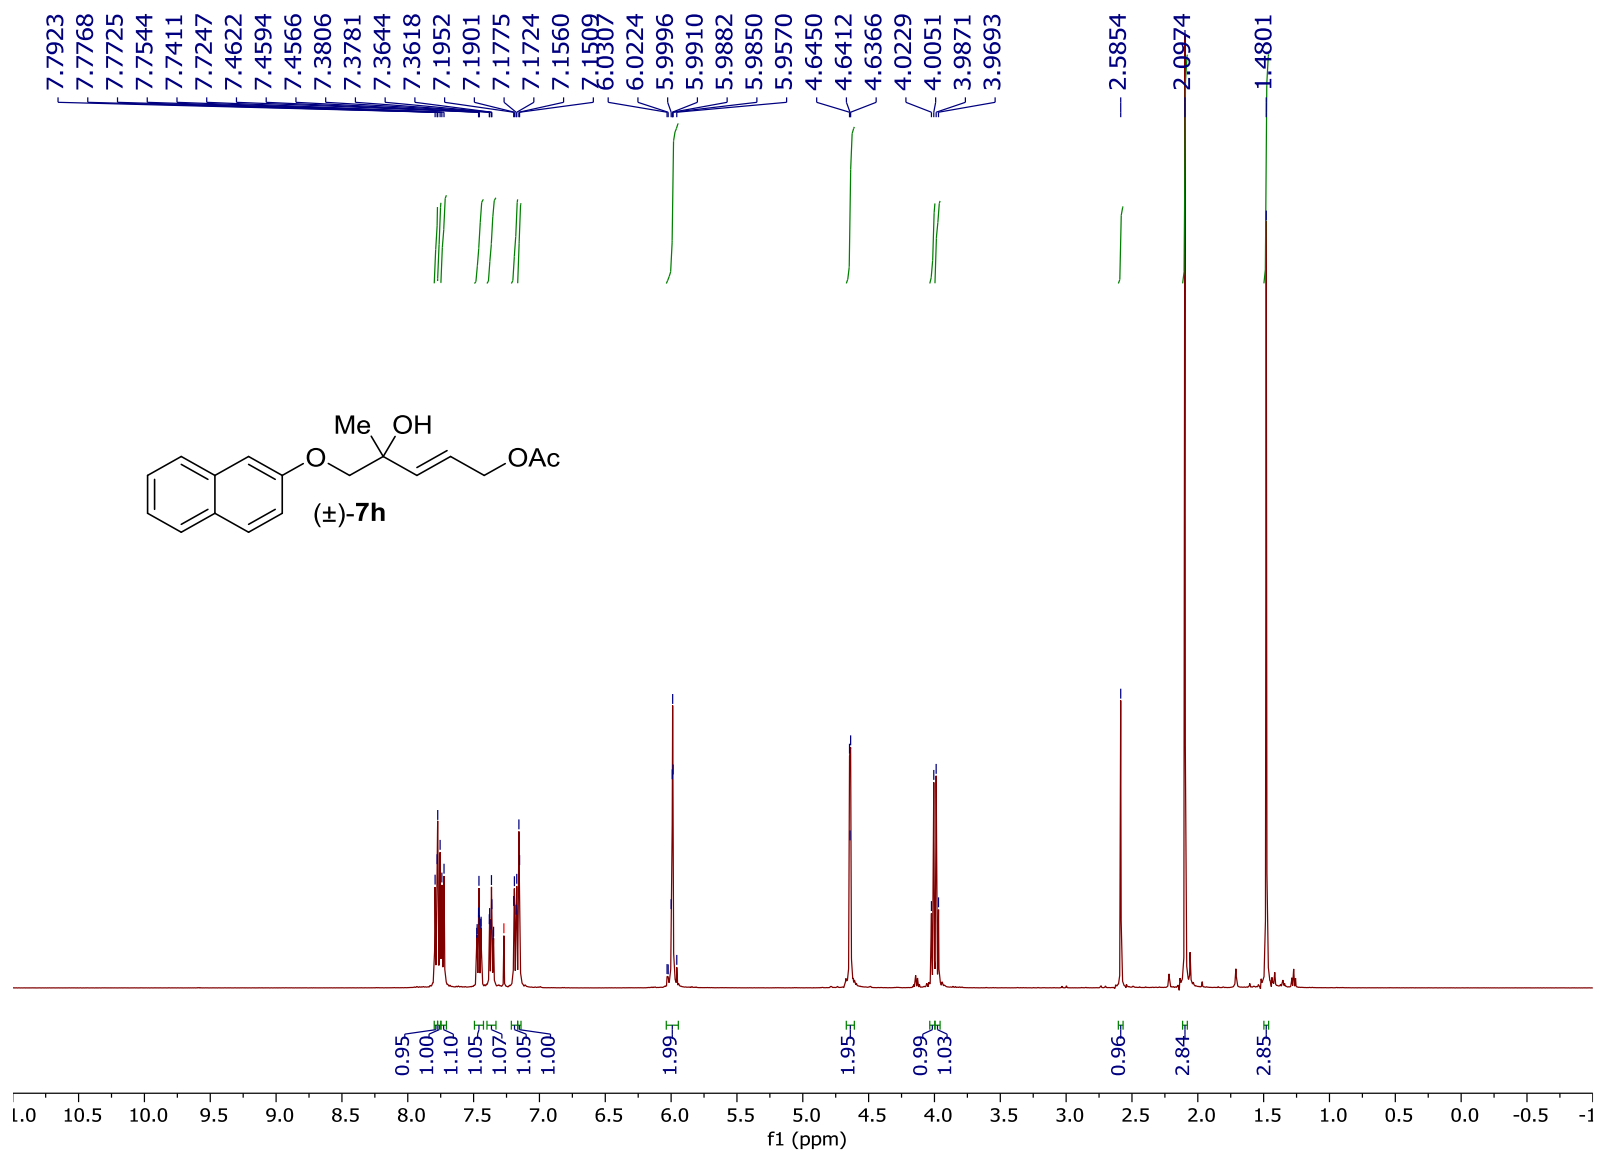

Compound 7h, 500 MHz <sup>1</sup>H NMR Spectrum in CDCl<sub>3</sub>

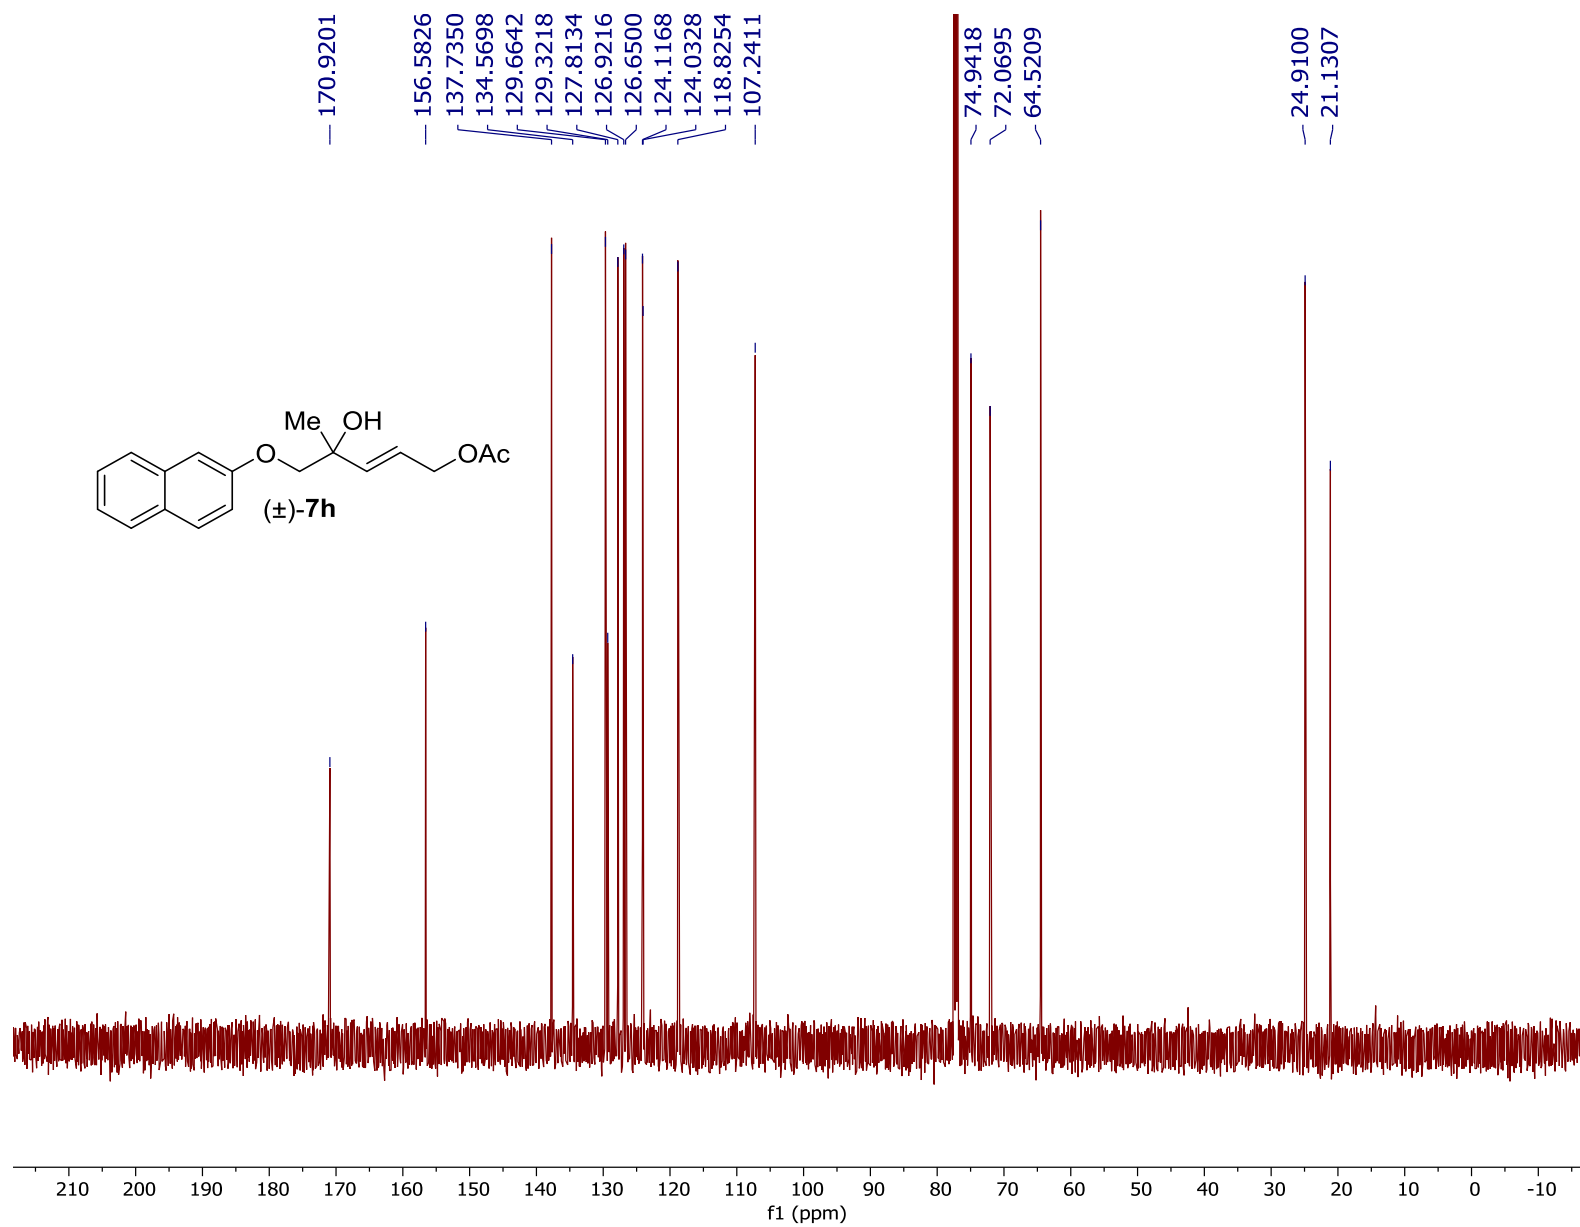

Compound 7h, 126 MHz  $^{13}\text{C}$  NMR Spectrum in  $\text{CDCl}_3$

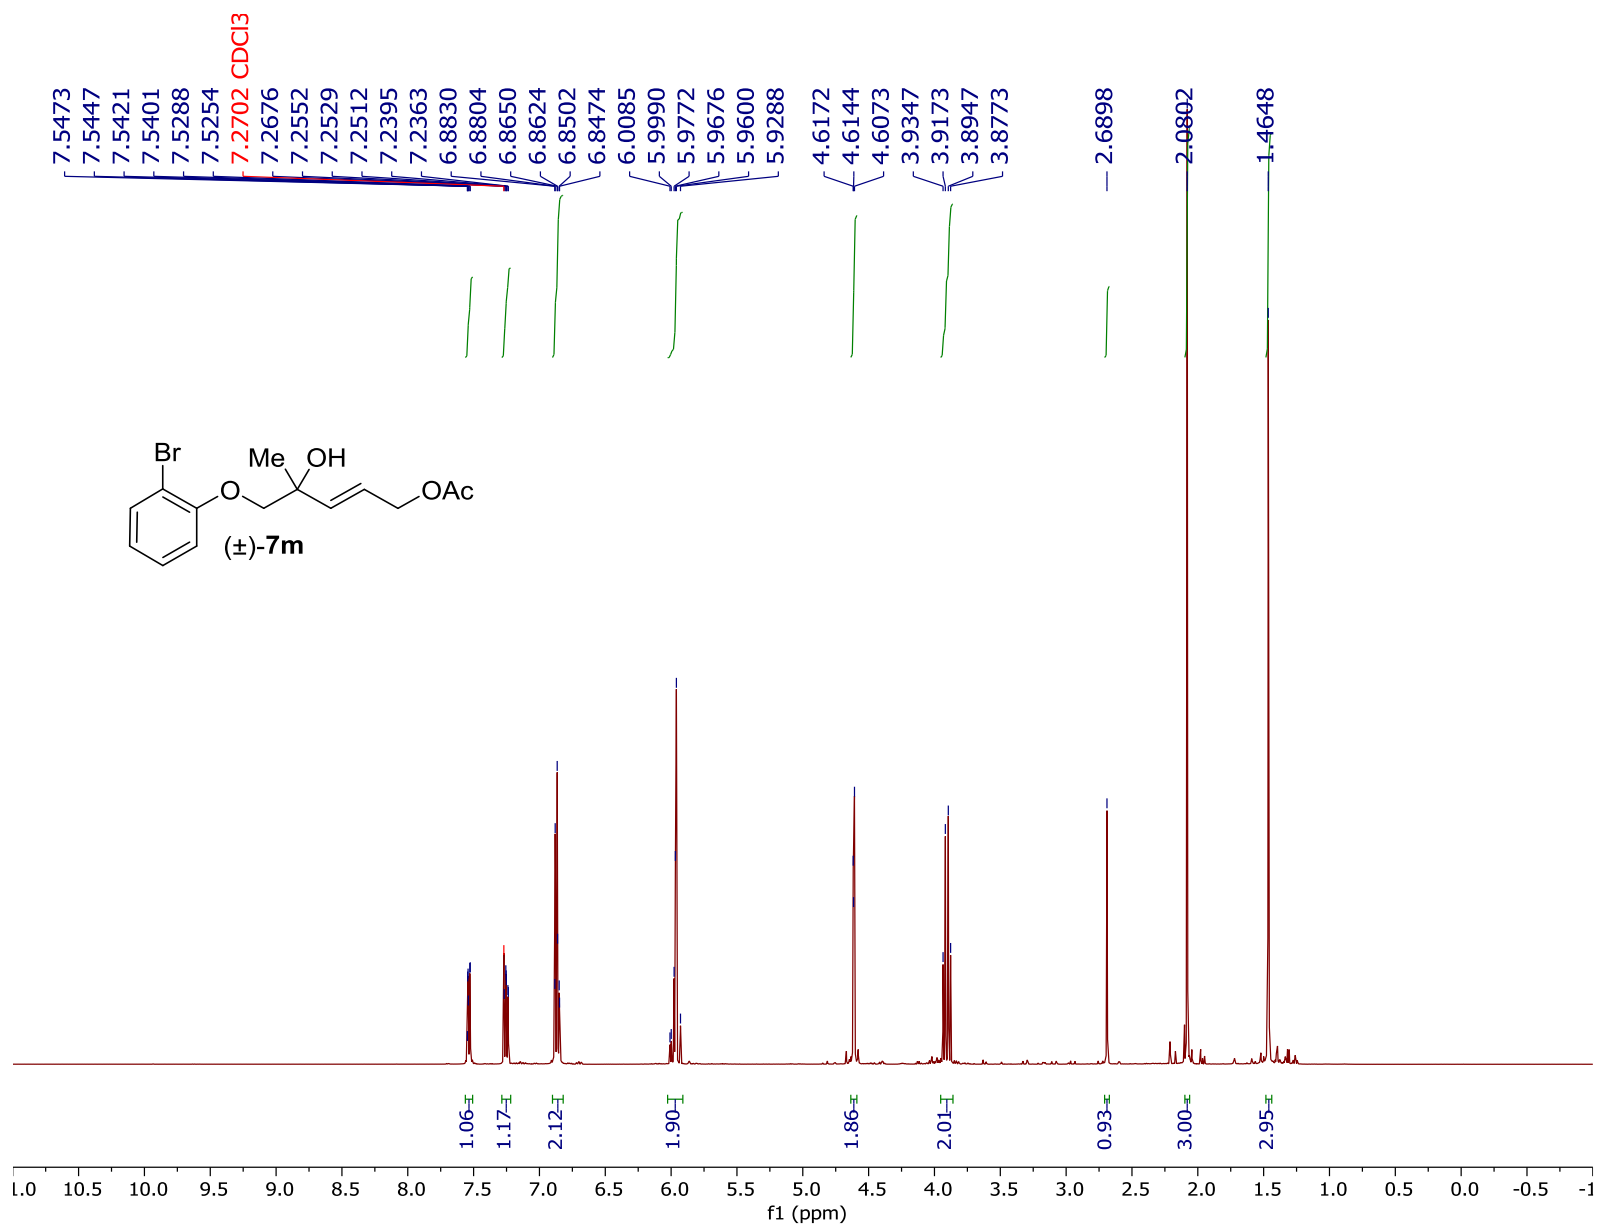

Compound 7m, 500 MHz <sup>1</sup>H NMR Spectrum in CDCl<sub>3</sub>

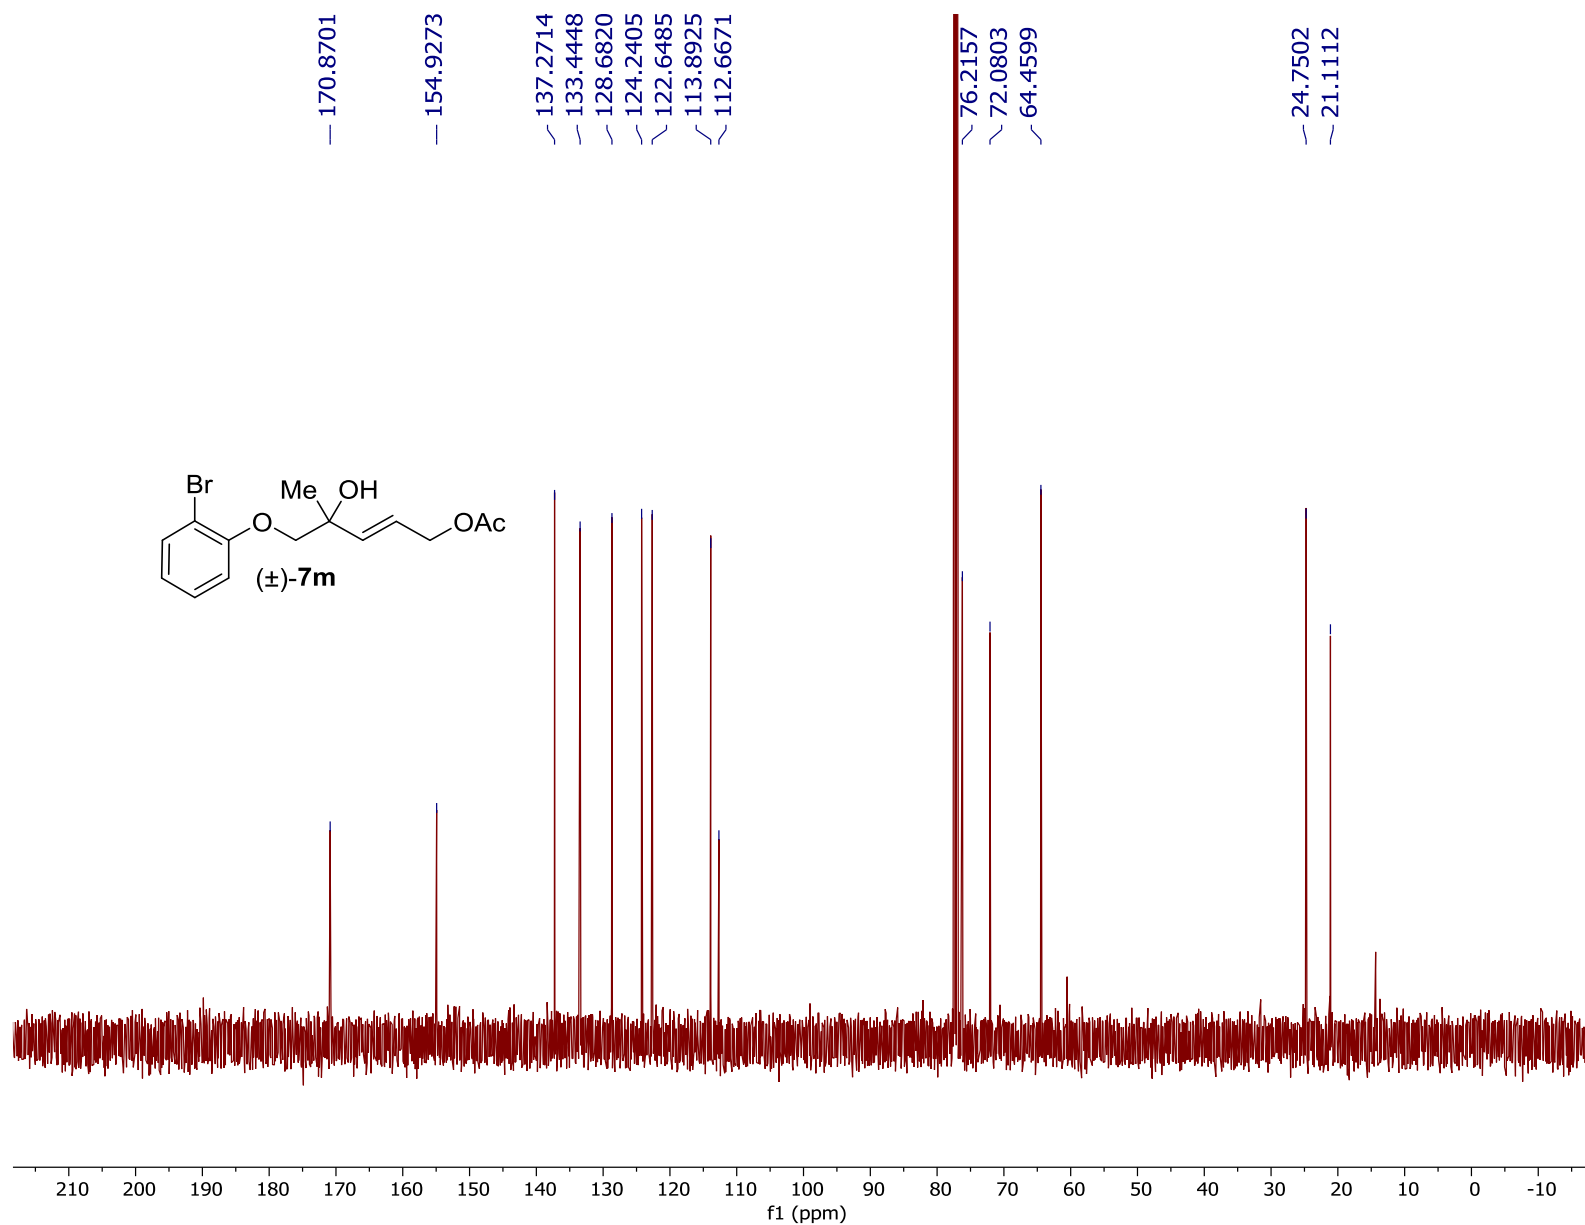

Compound 7m, 126 MHz  $^{13}\text{C}$  NMR Spectrum in  $\text{CDCl}_3$

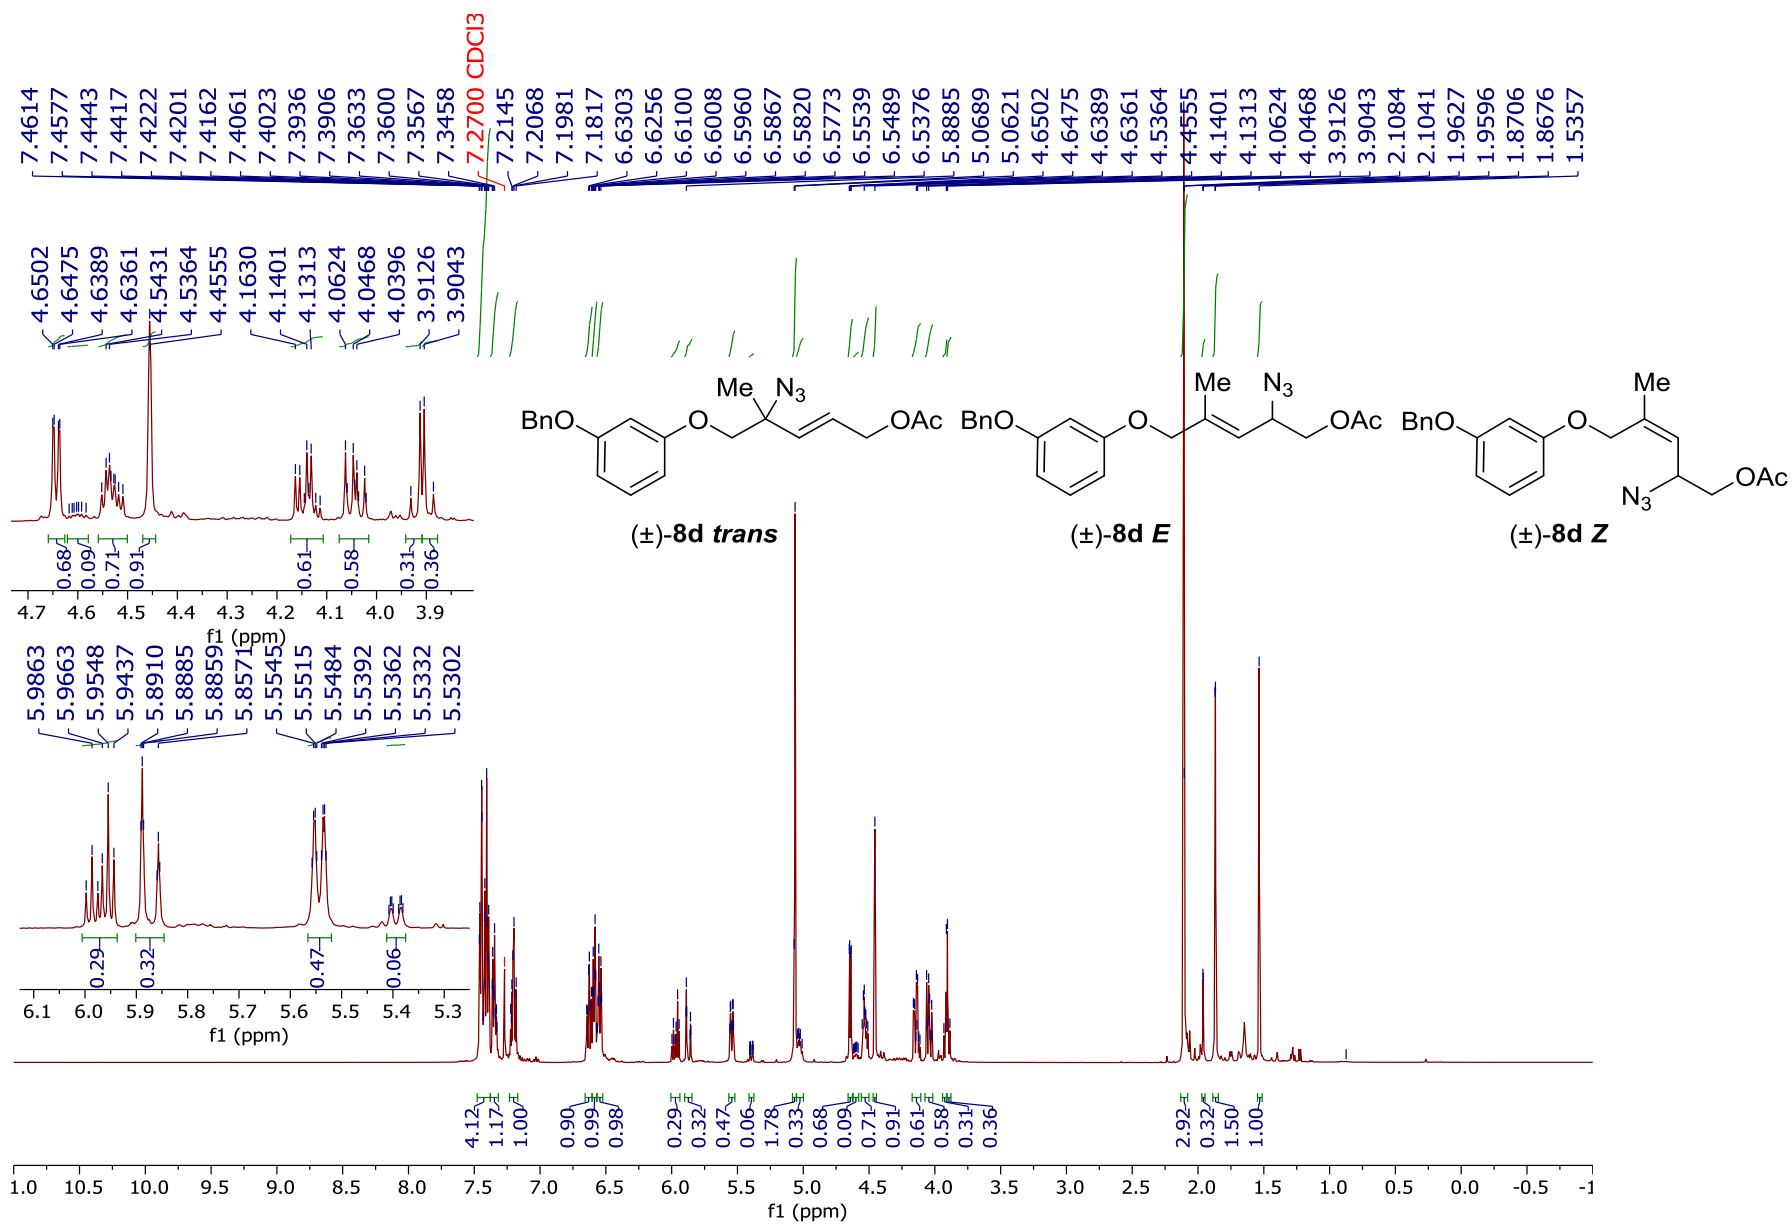

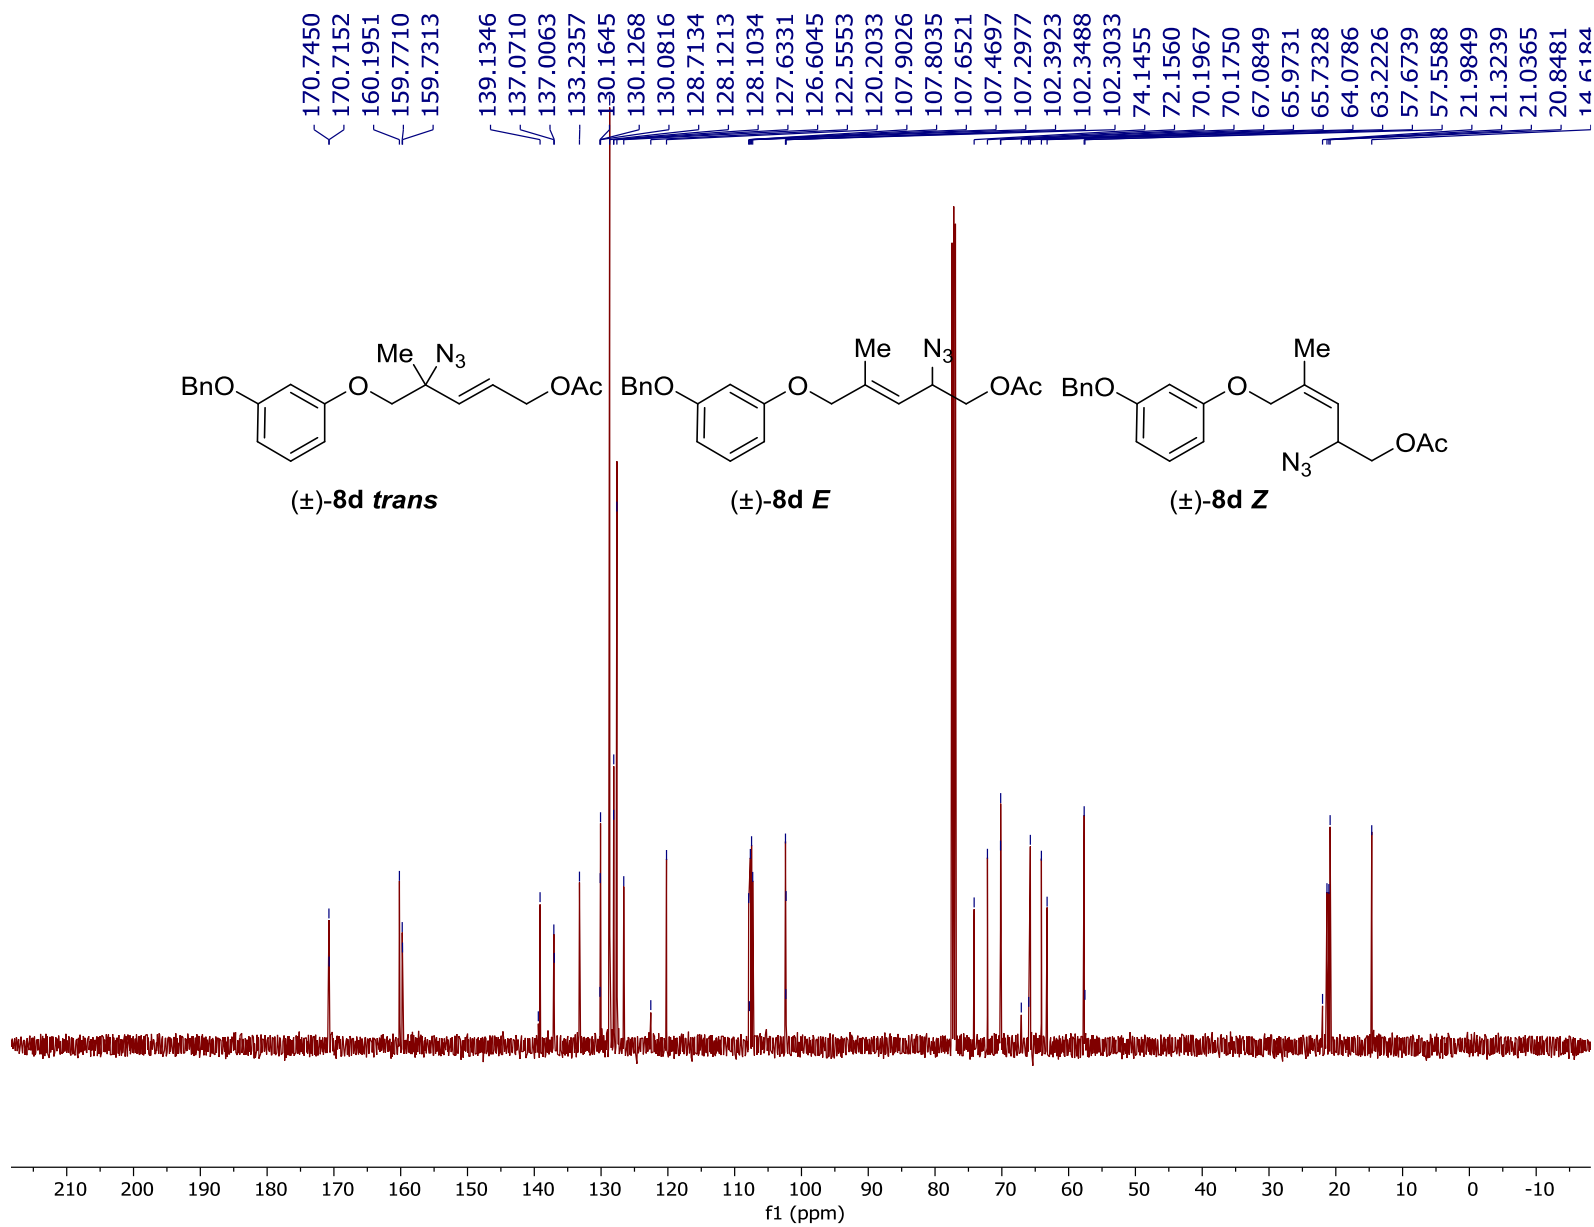

Compound 8d, 126 MHz <sup>13</sup>C NMR Spectrum in CDCl<sub>3</sub>

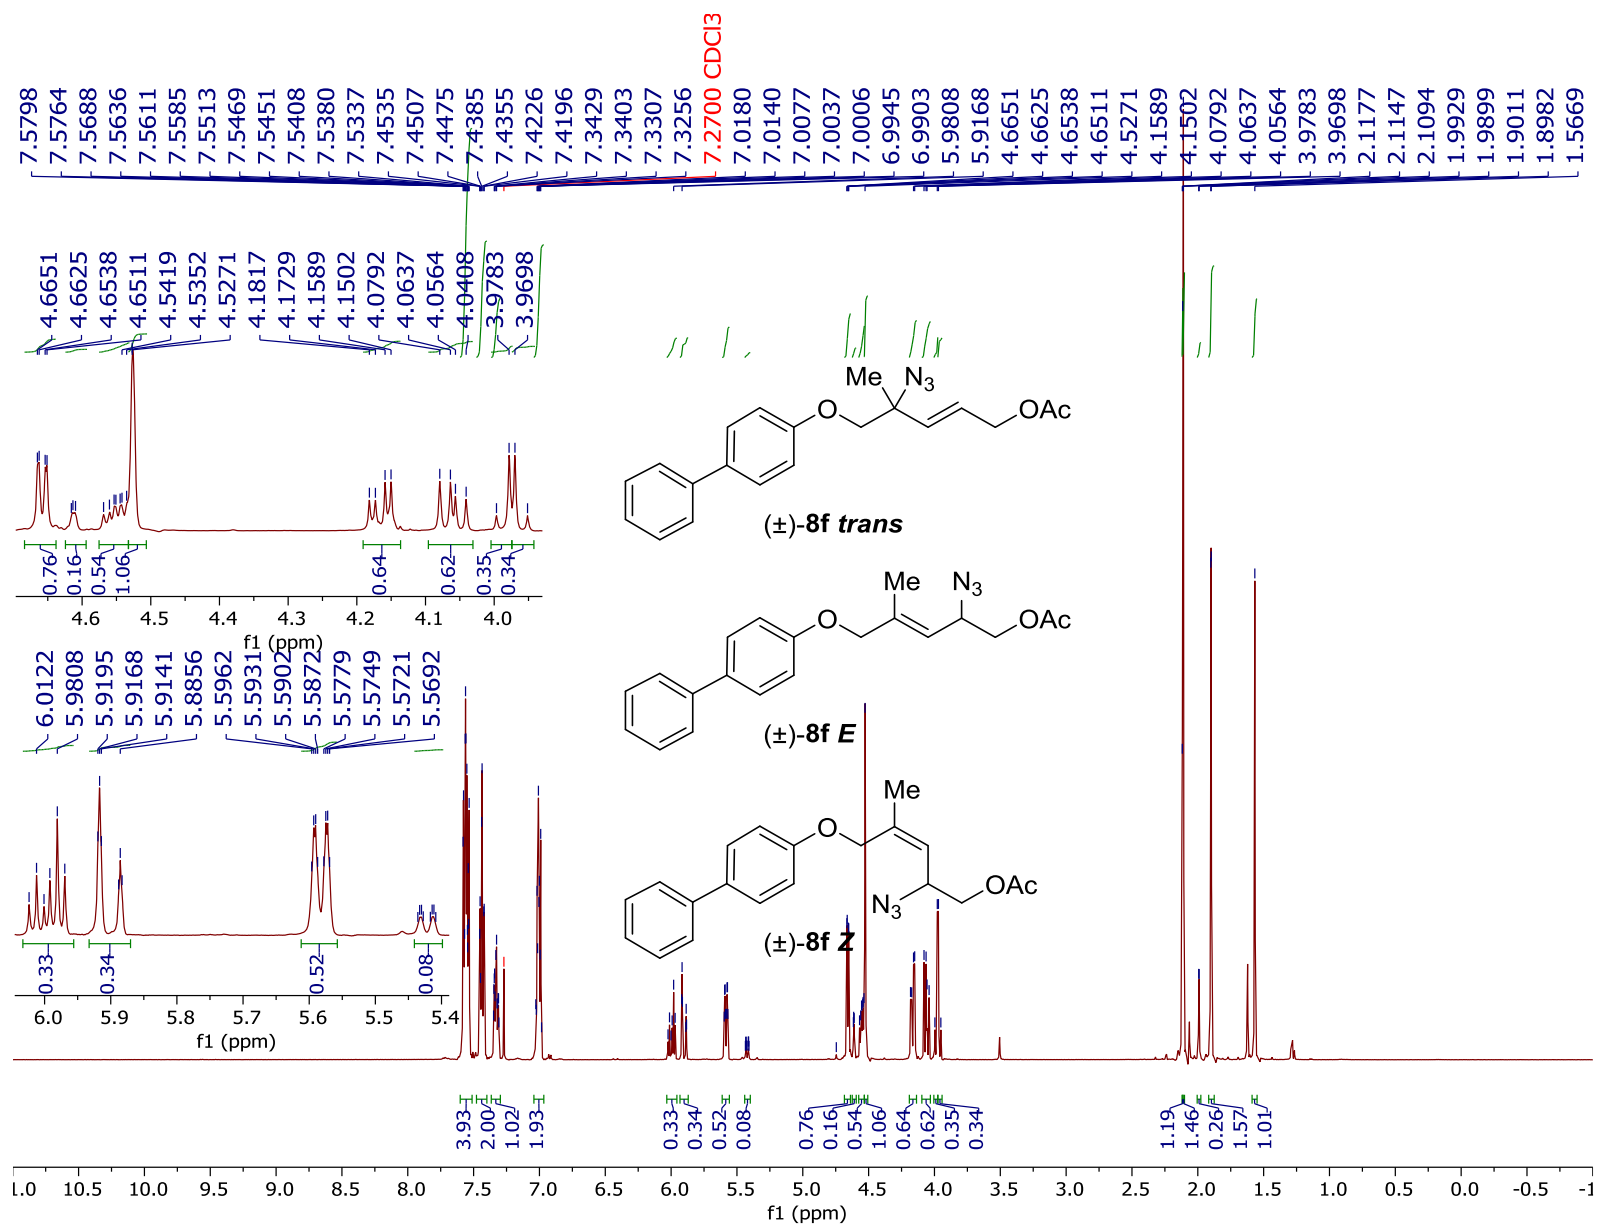



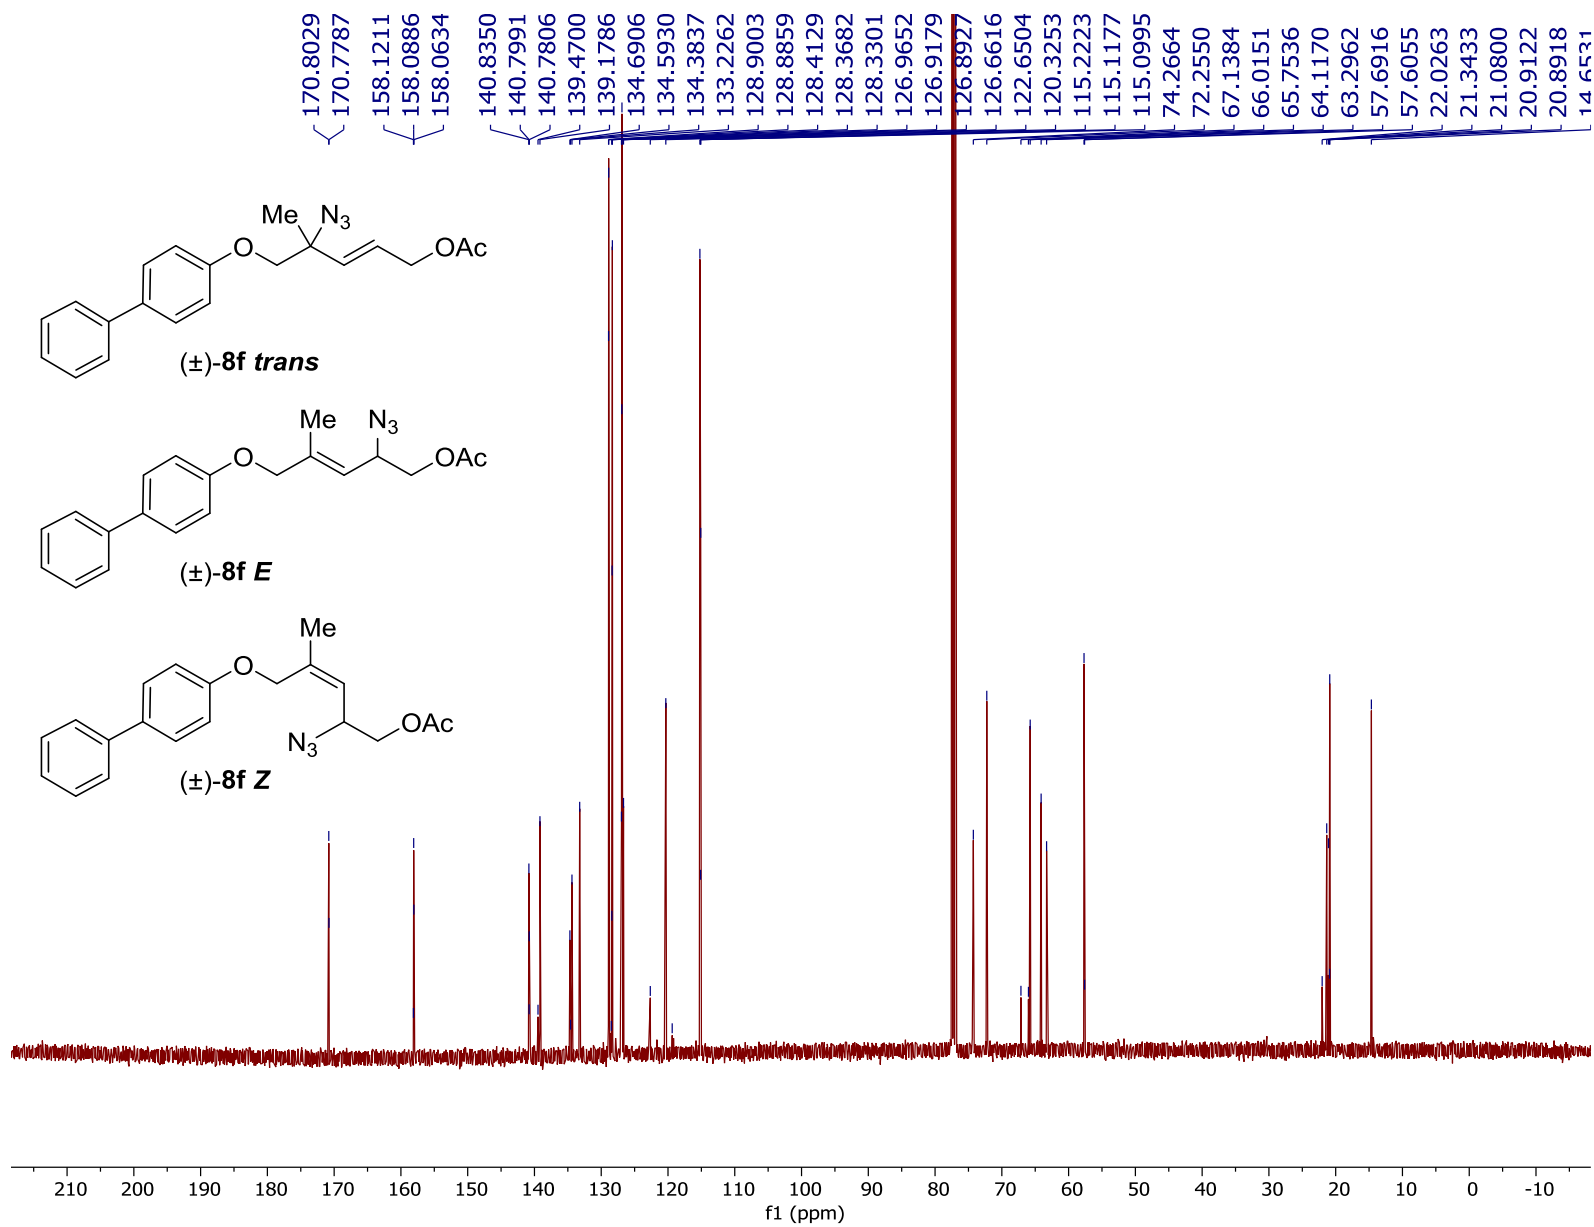

Compound 8f, 126 MHz <sup>13</sup>C NMR Spectrum in CDCl<sub>3</sub>

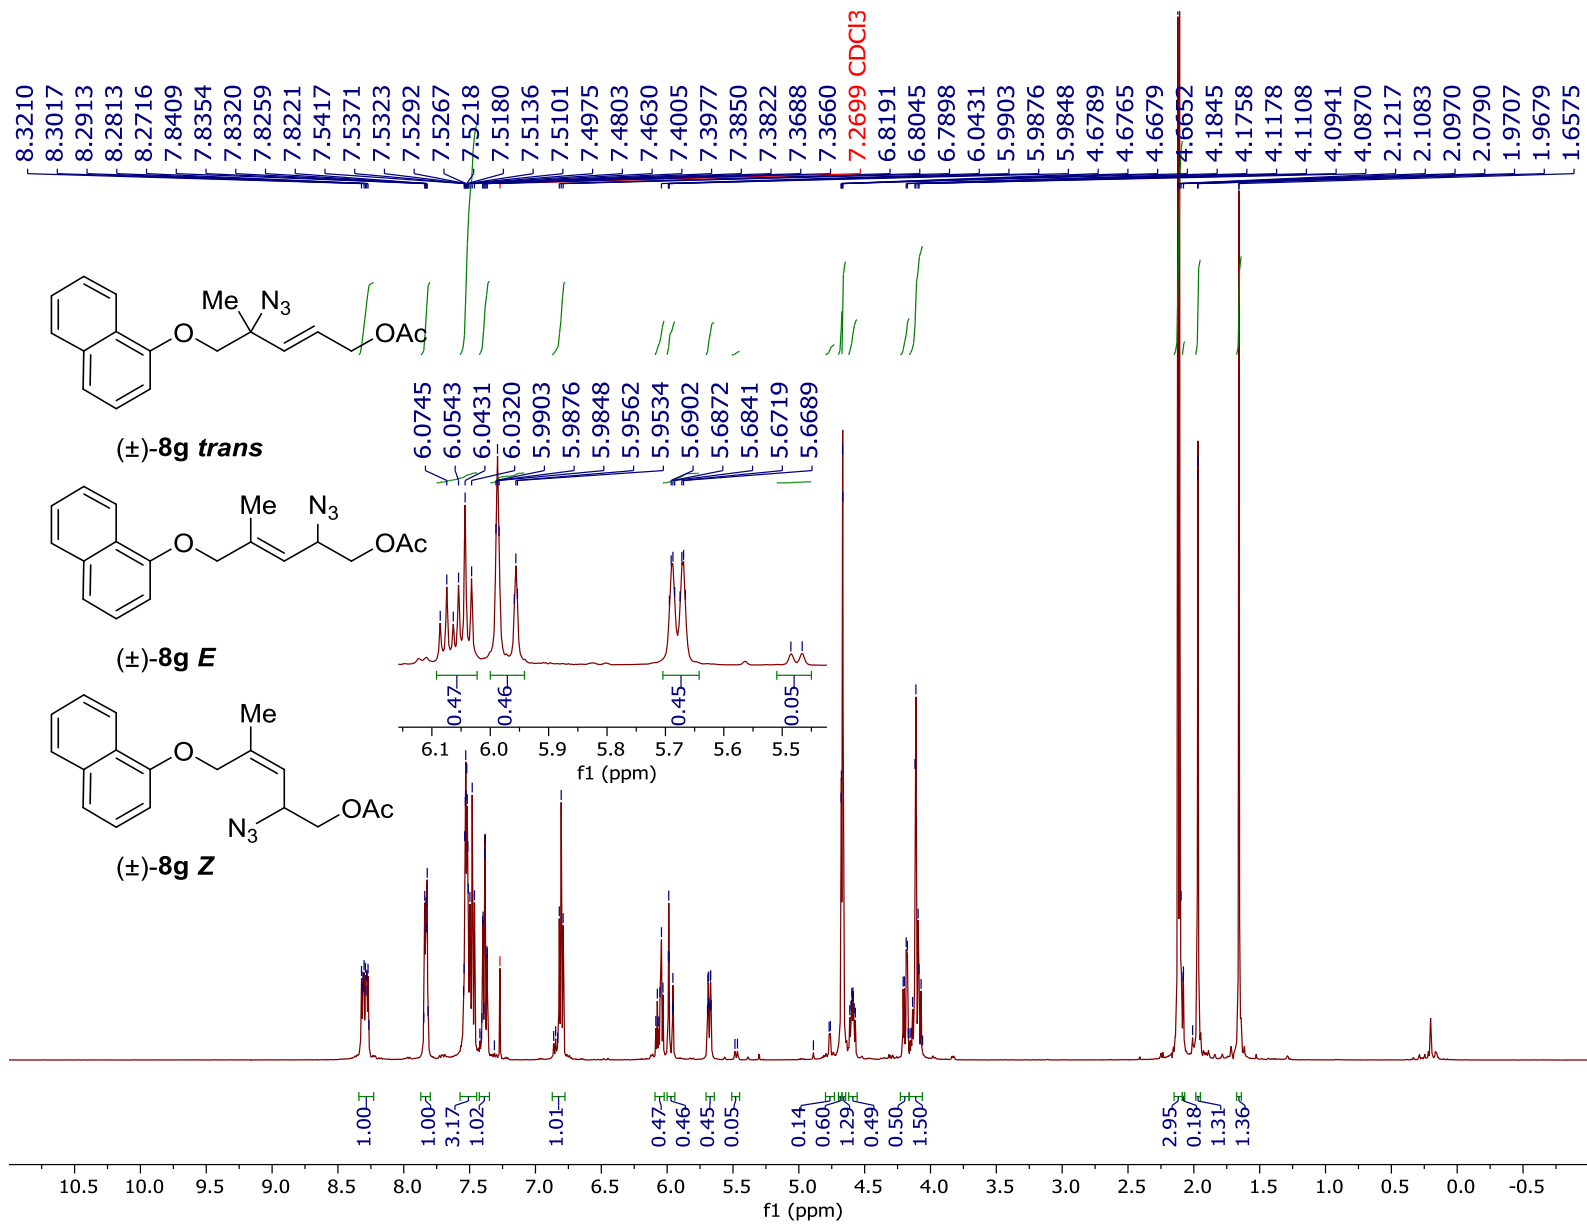

Compound 8g, 500 MHz <sup>1</sup>H NMR Spectrum in CDCl<sub>3</sub>

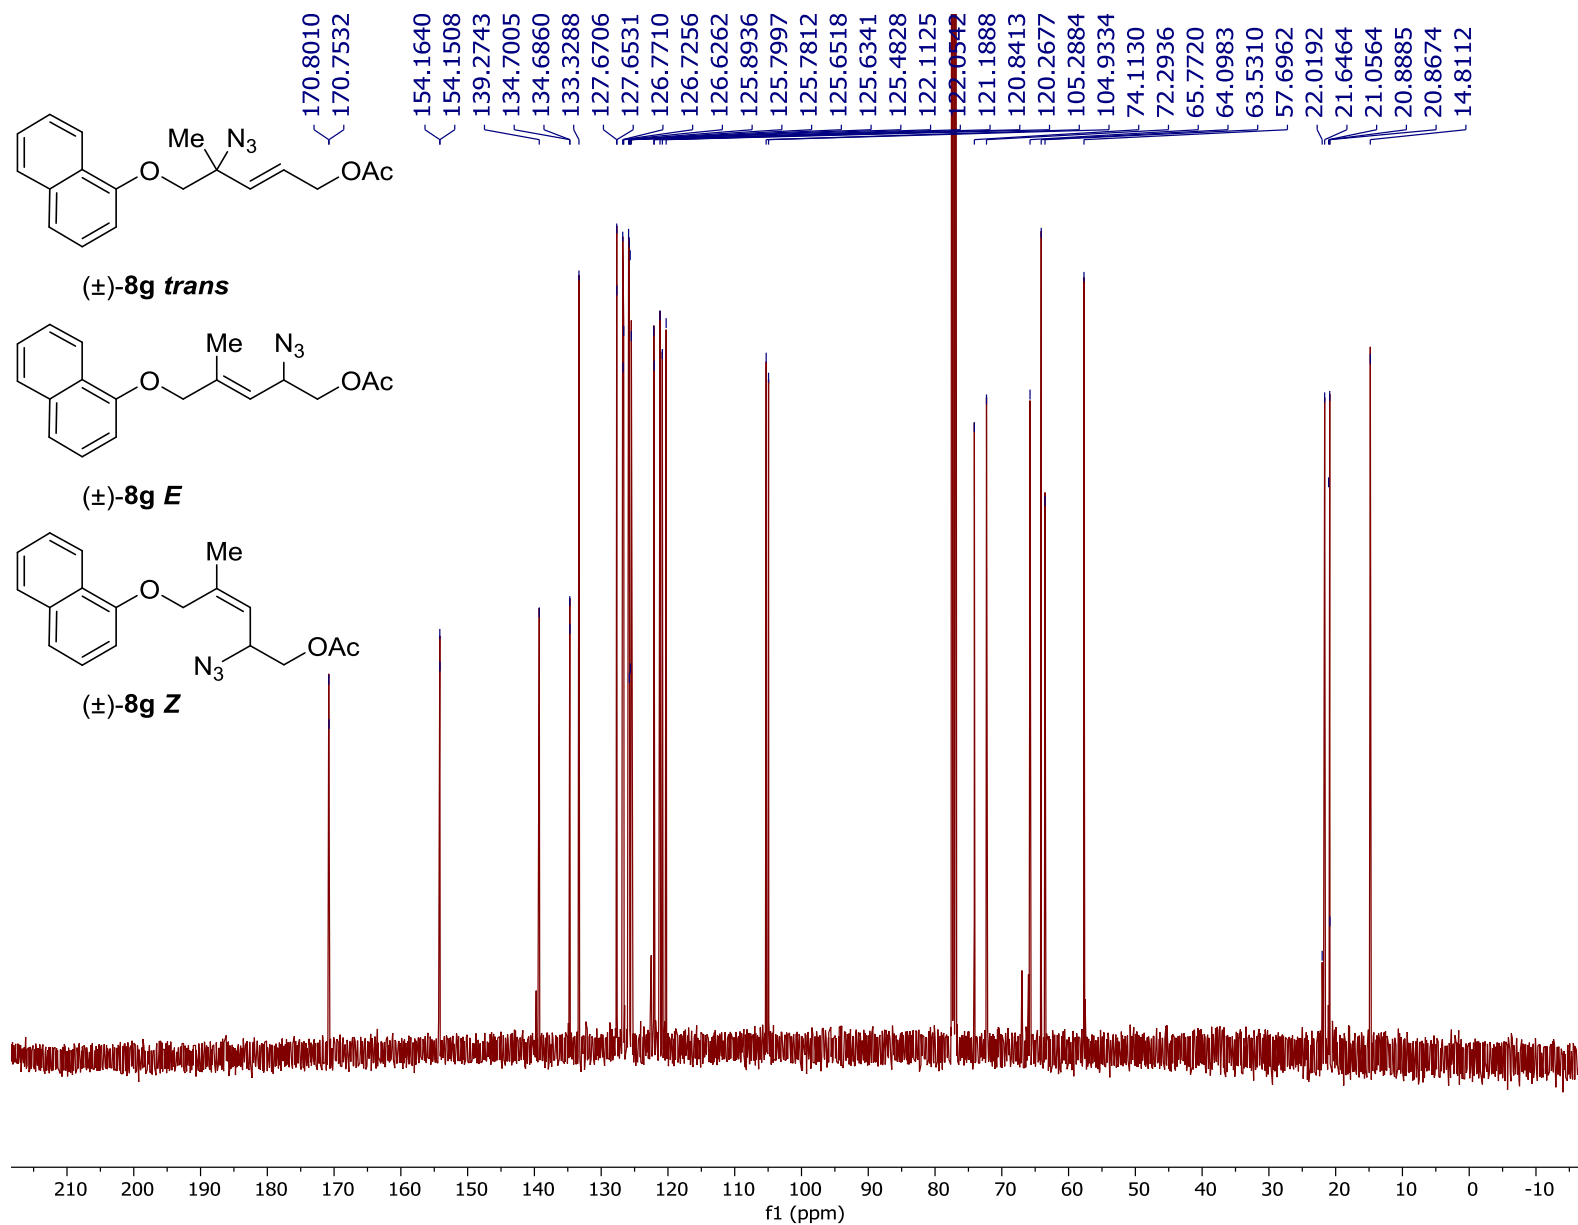

Compound 8g, 126 MHz <sup>13</sup>C NMR Spectrum in CDCl<sub>3</sub>

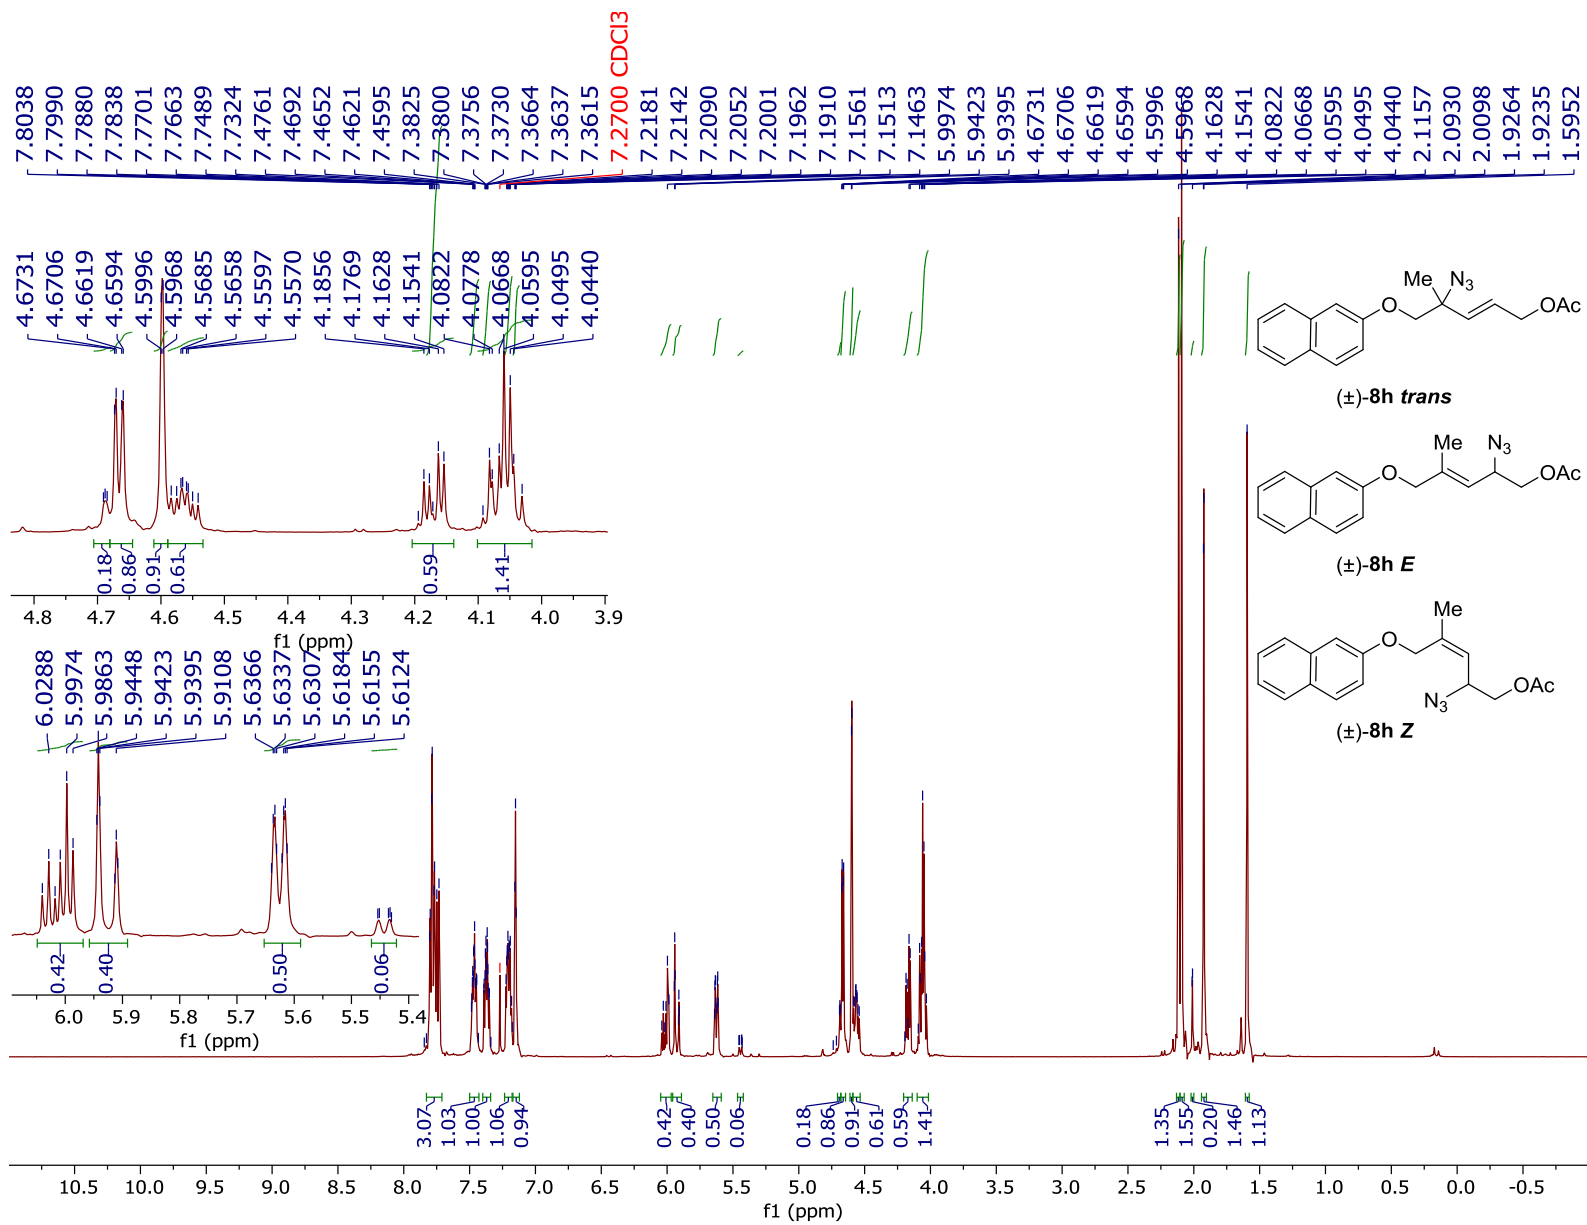

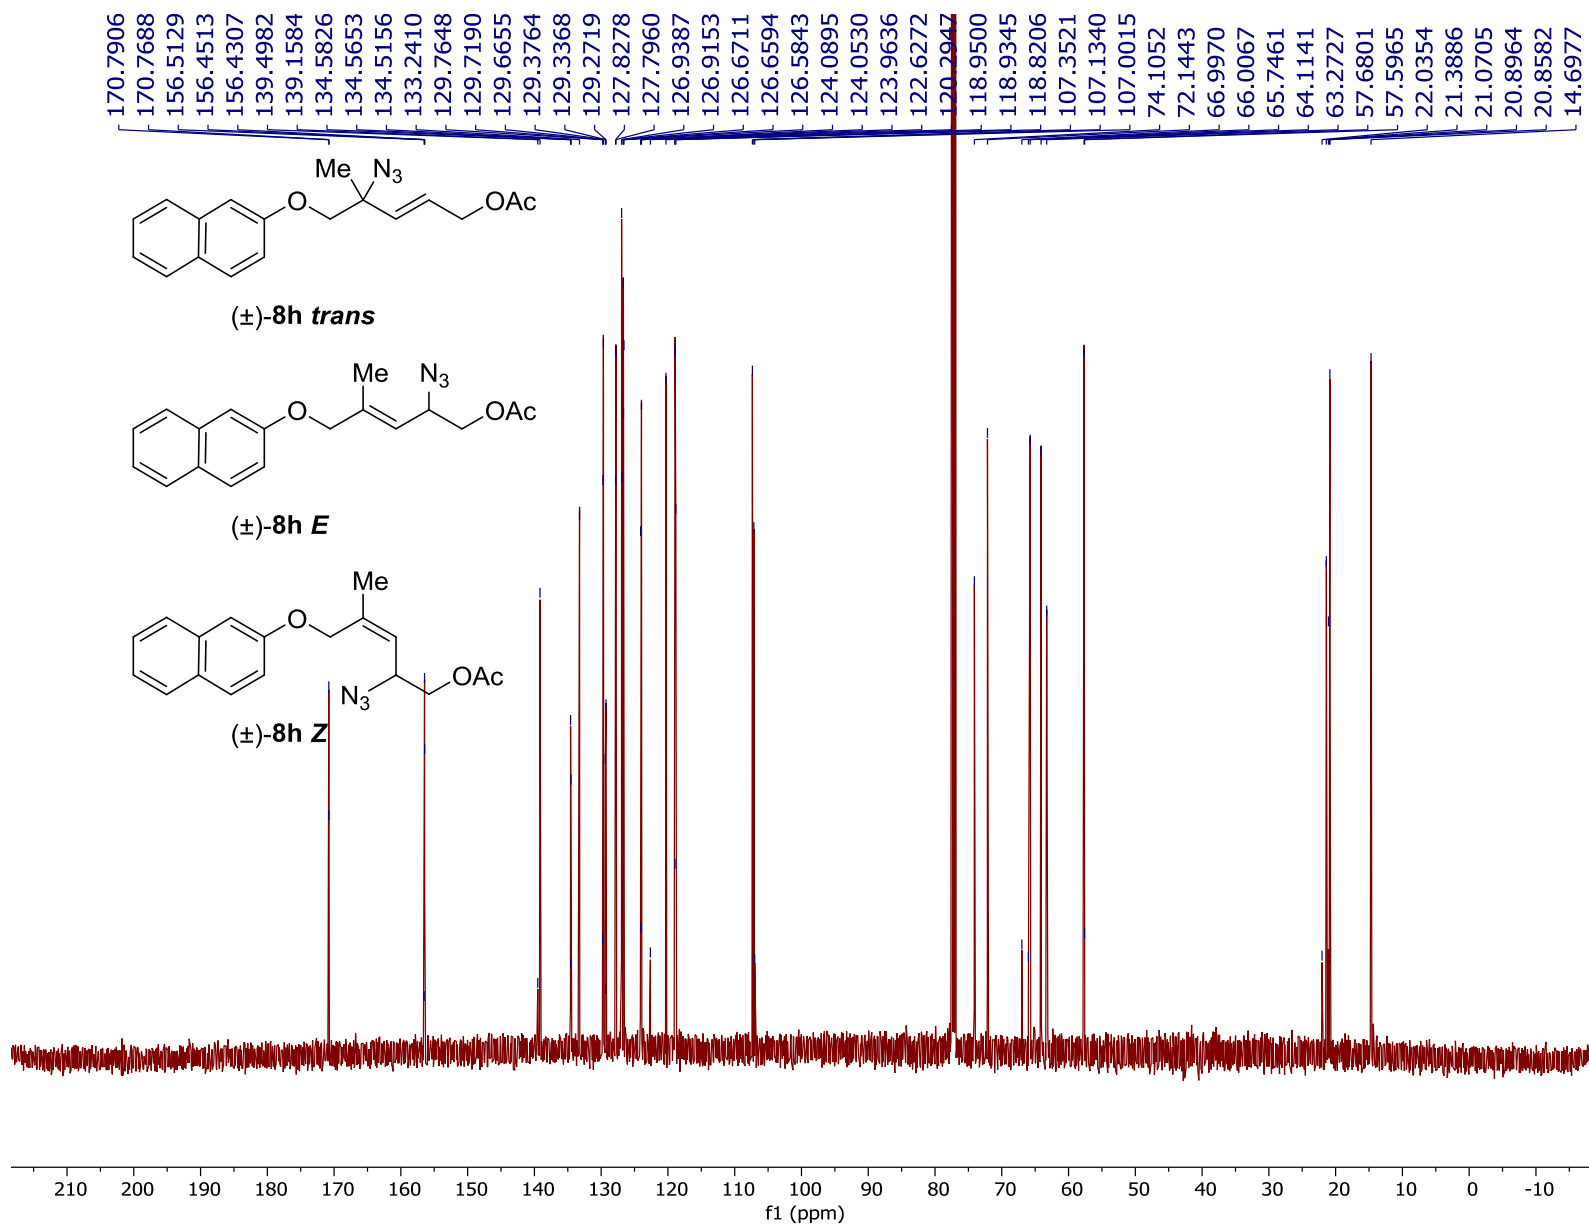

Compound 8h, 126 MHz  $^{13}\text{C}$  NMR Spectrum in  $\text{CDCl}_3$

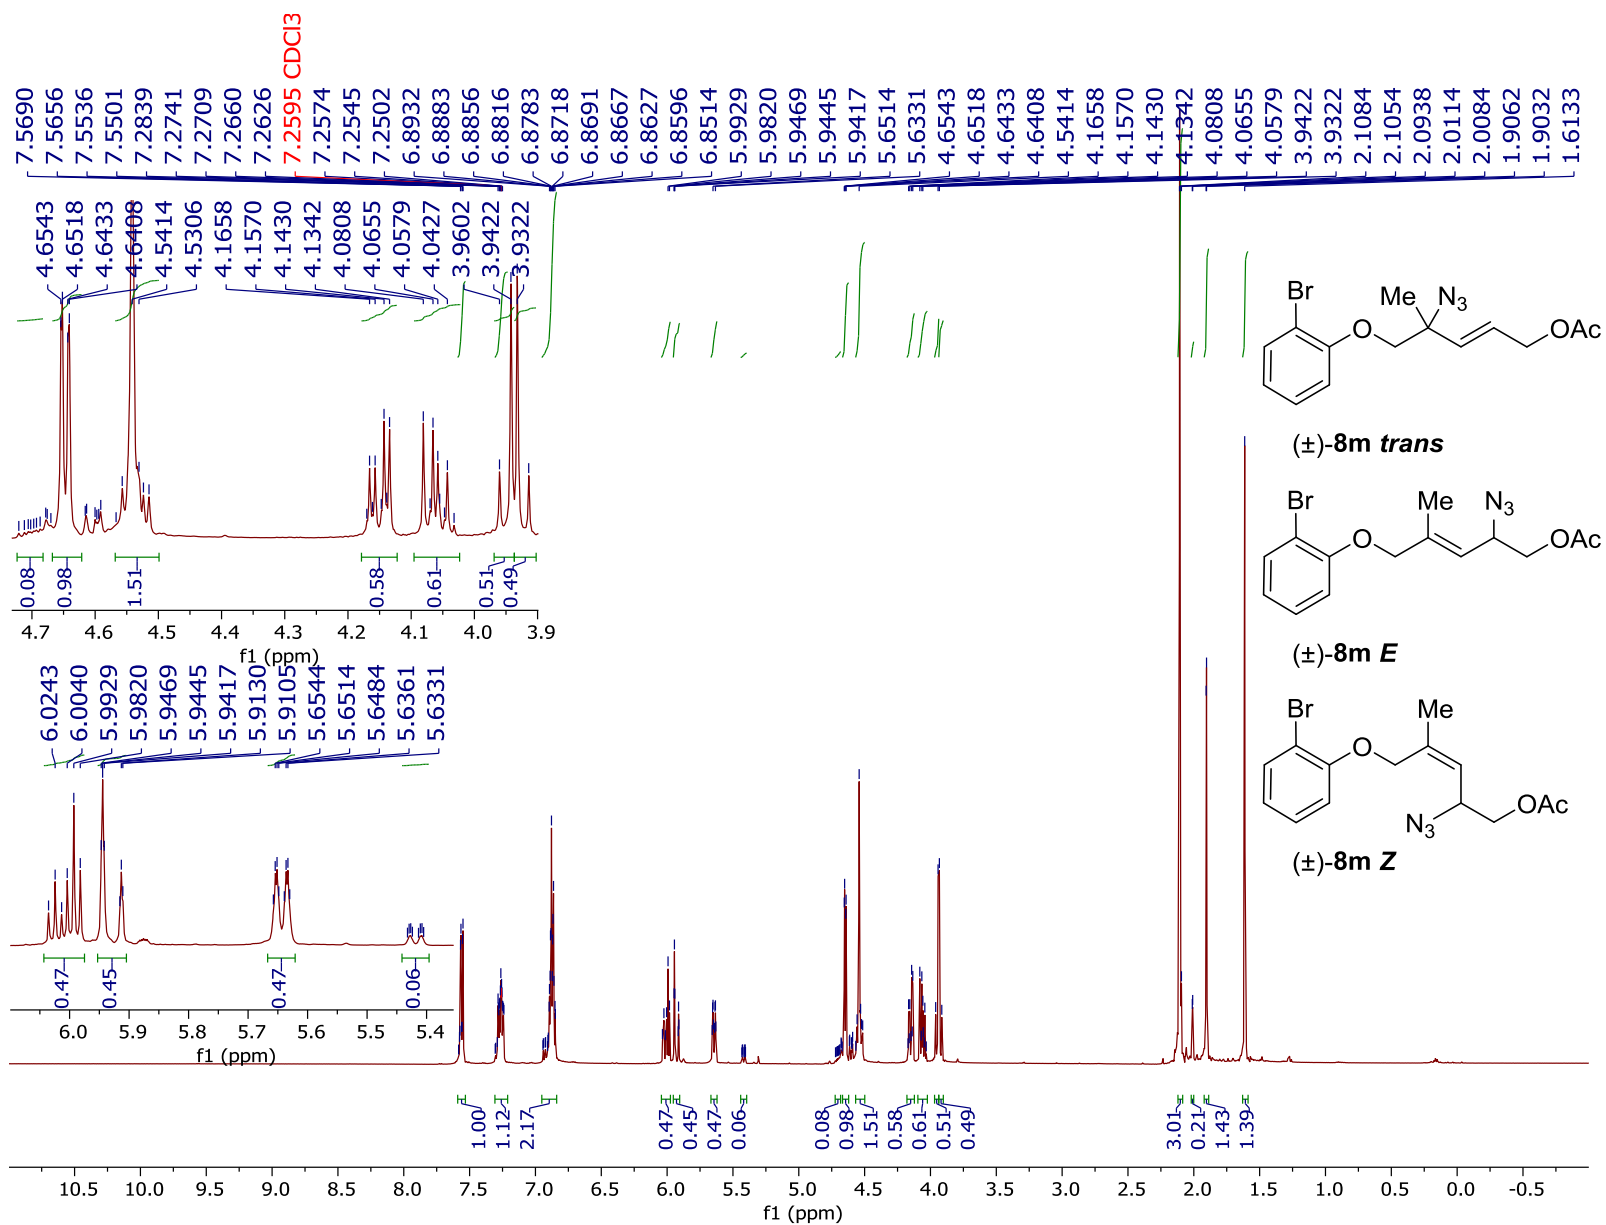

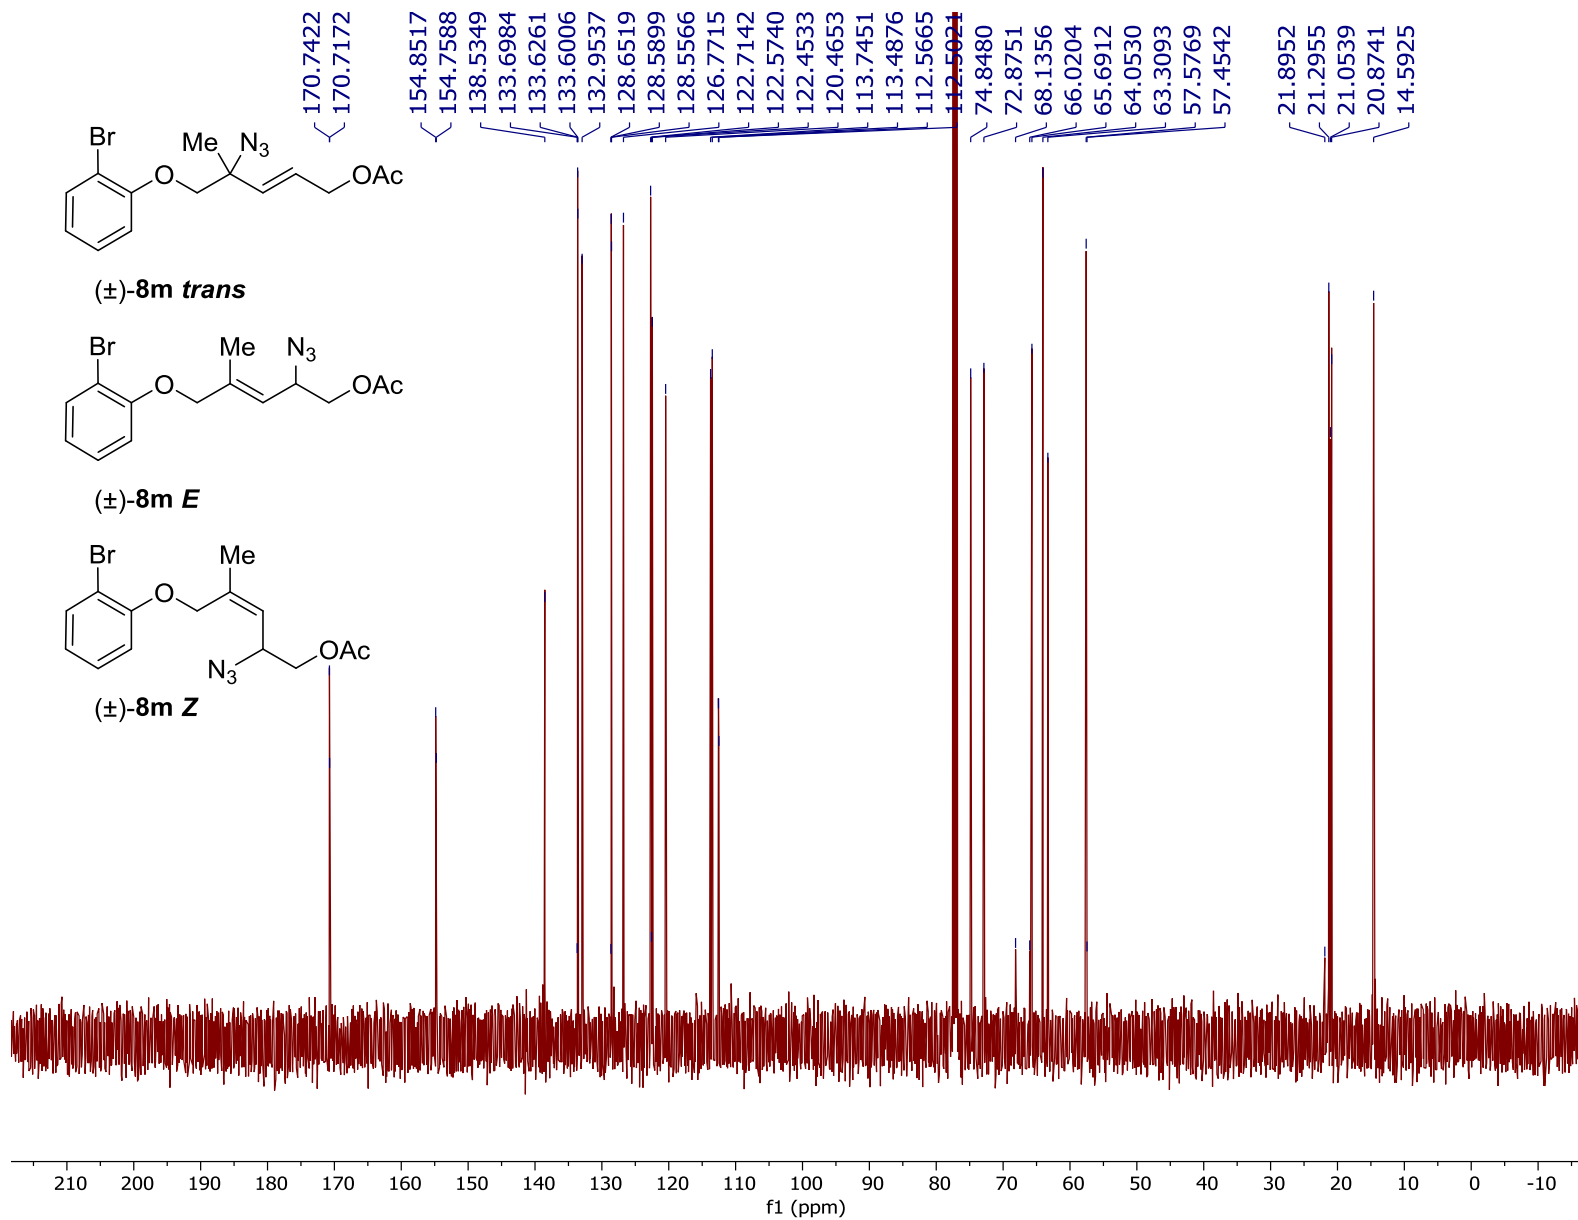

Compound 8m, 126 MHz <sup>13</sup>C NMR Spectrum in CDCl<sub>3</sub>

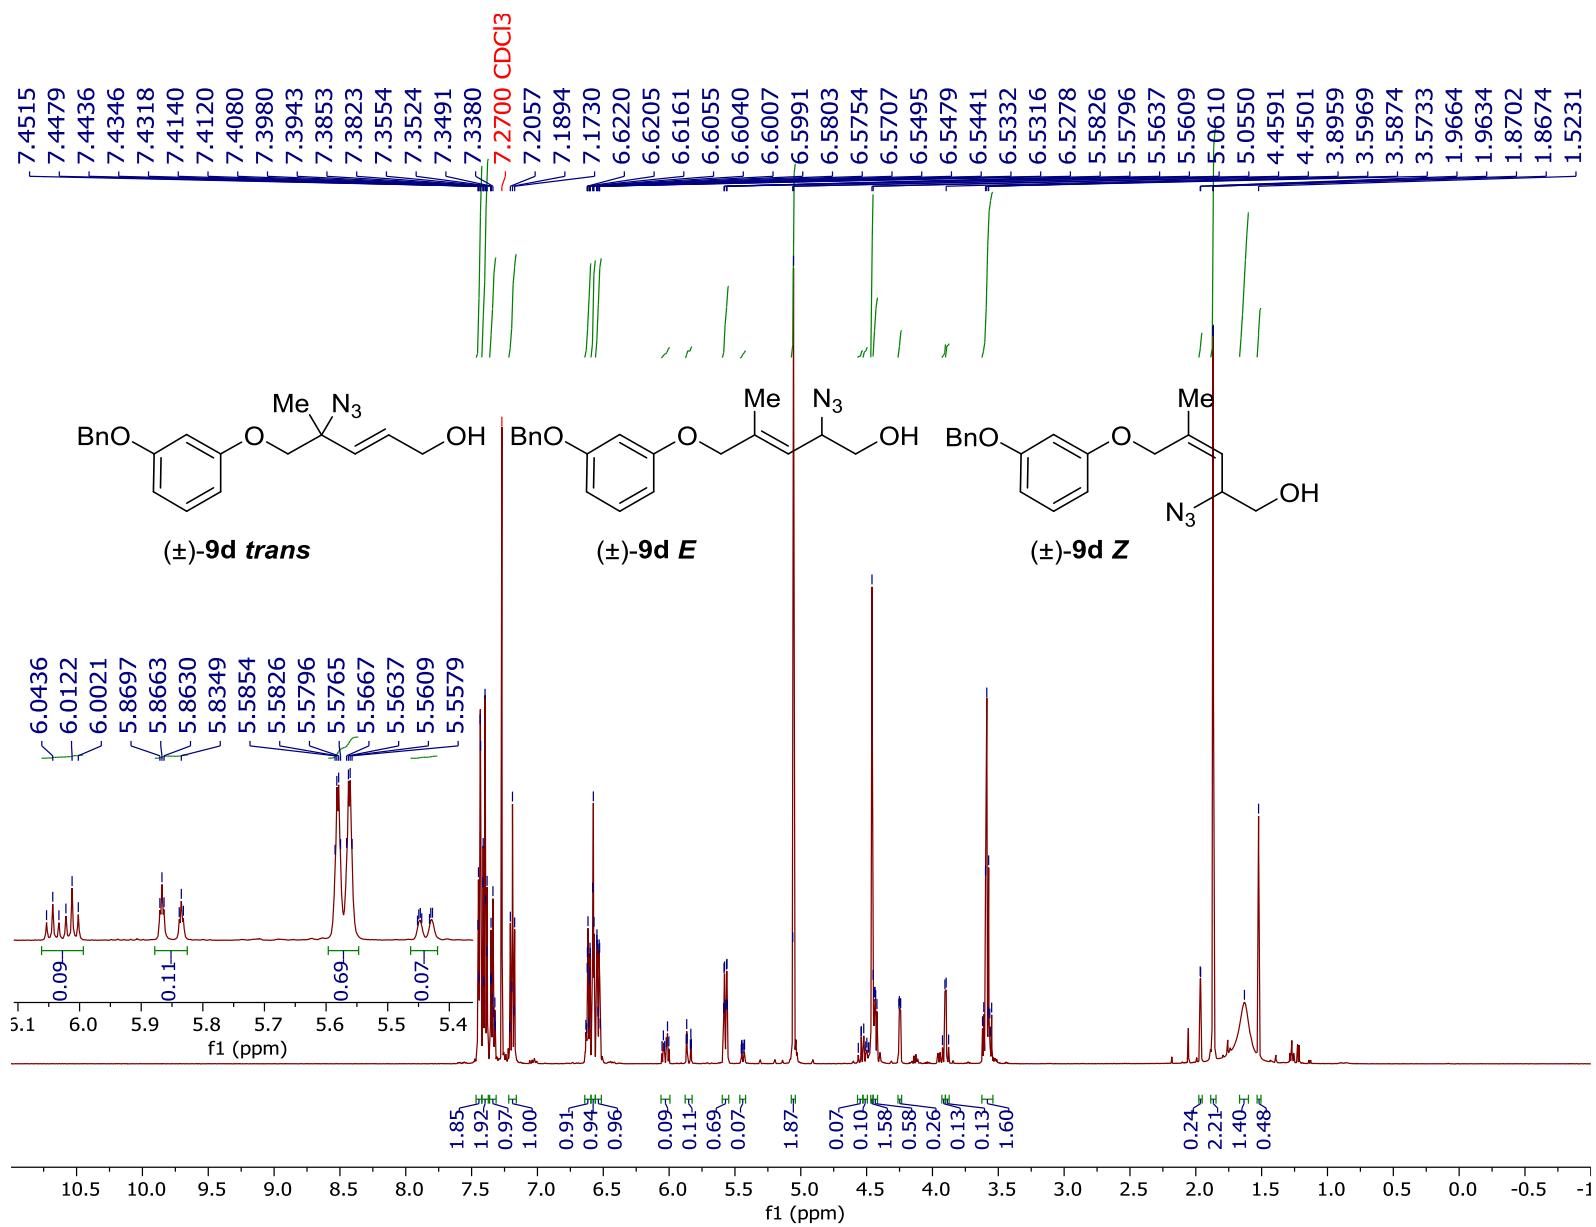



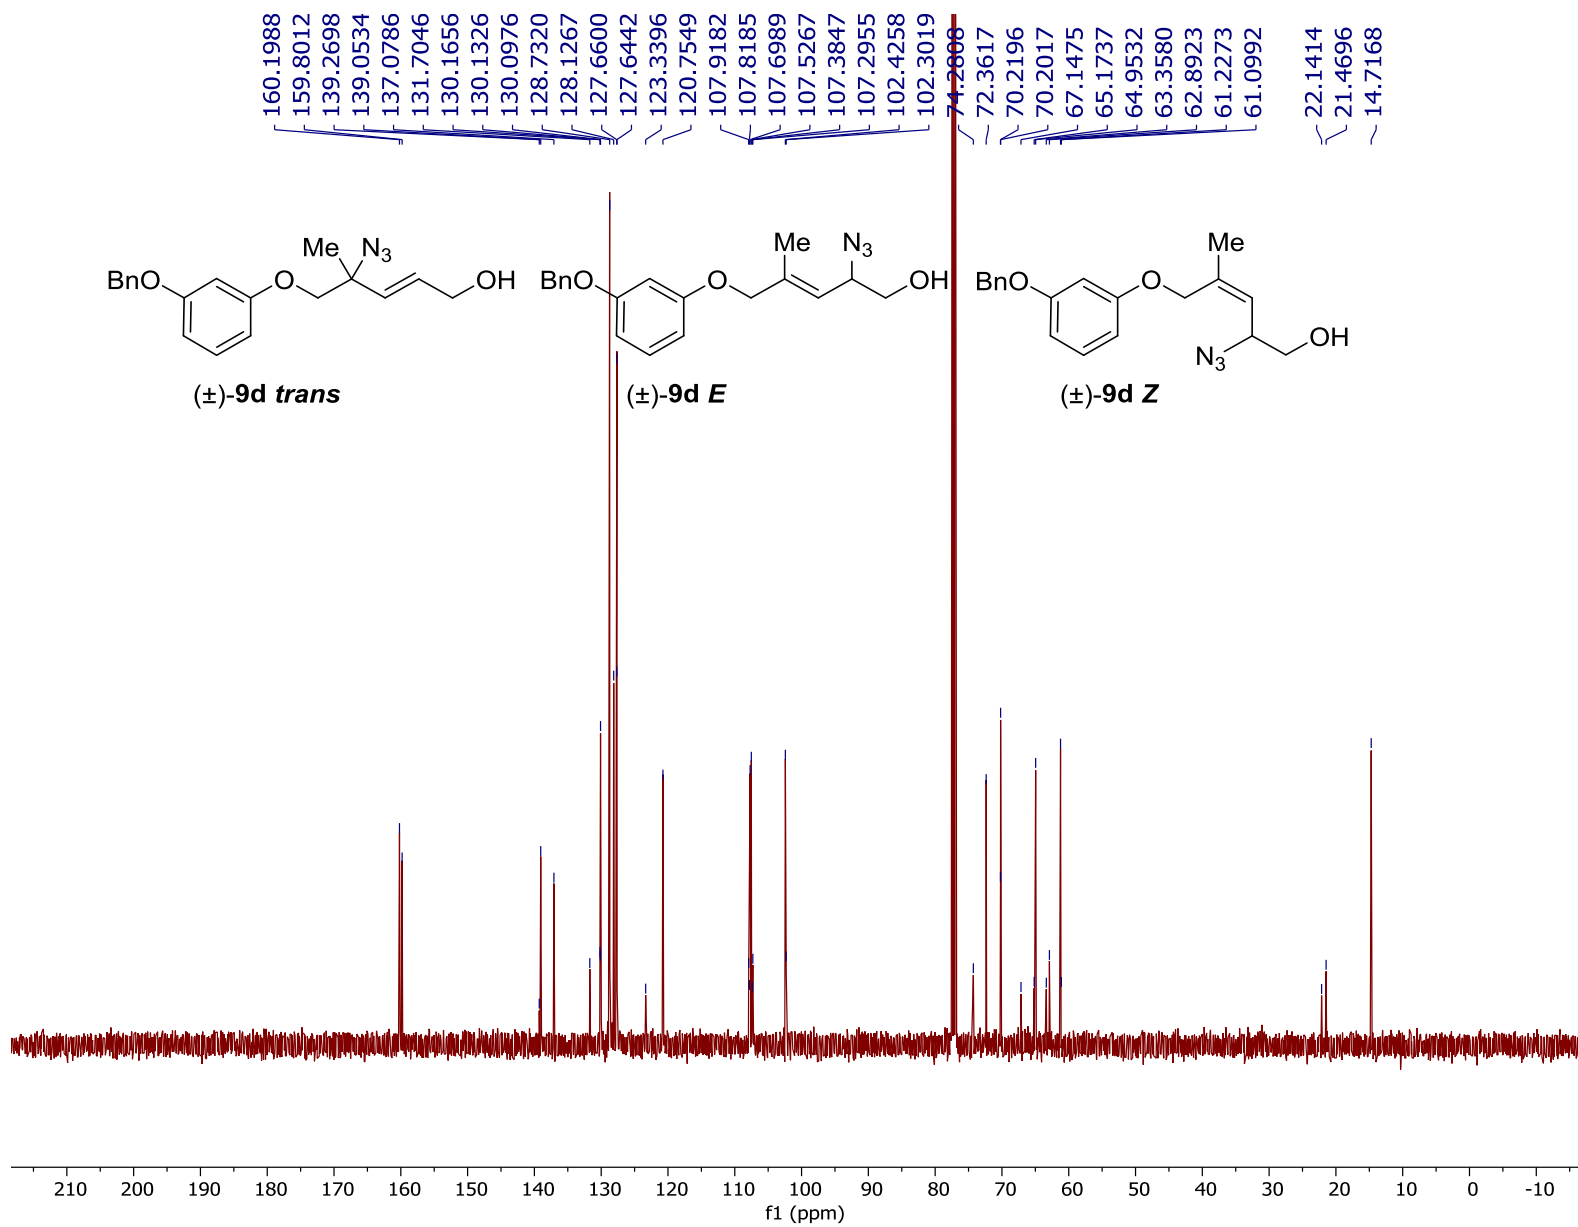

Compound 9d, 126 MHz <sup>13</sup>C NMR Spectrum in CDCl<sub>3</sub>

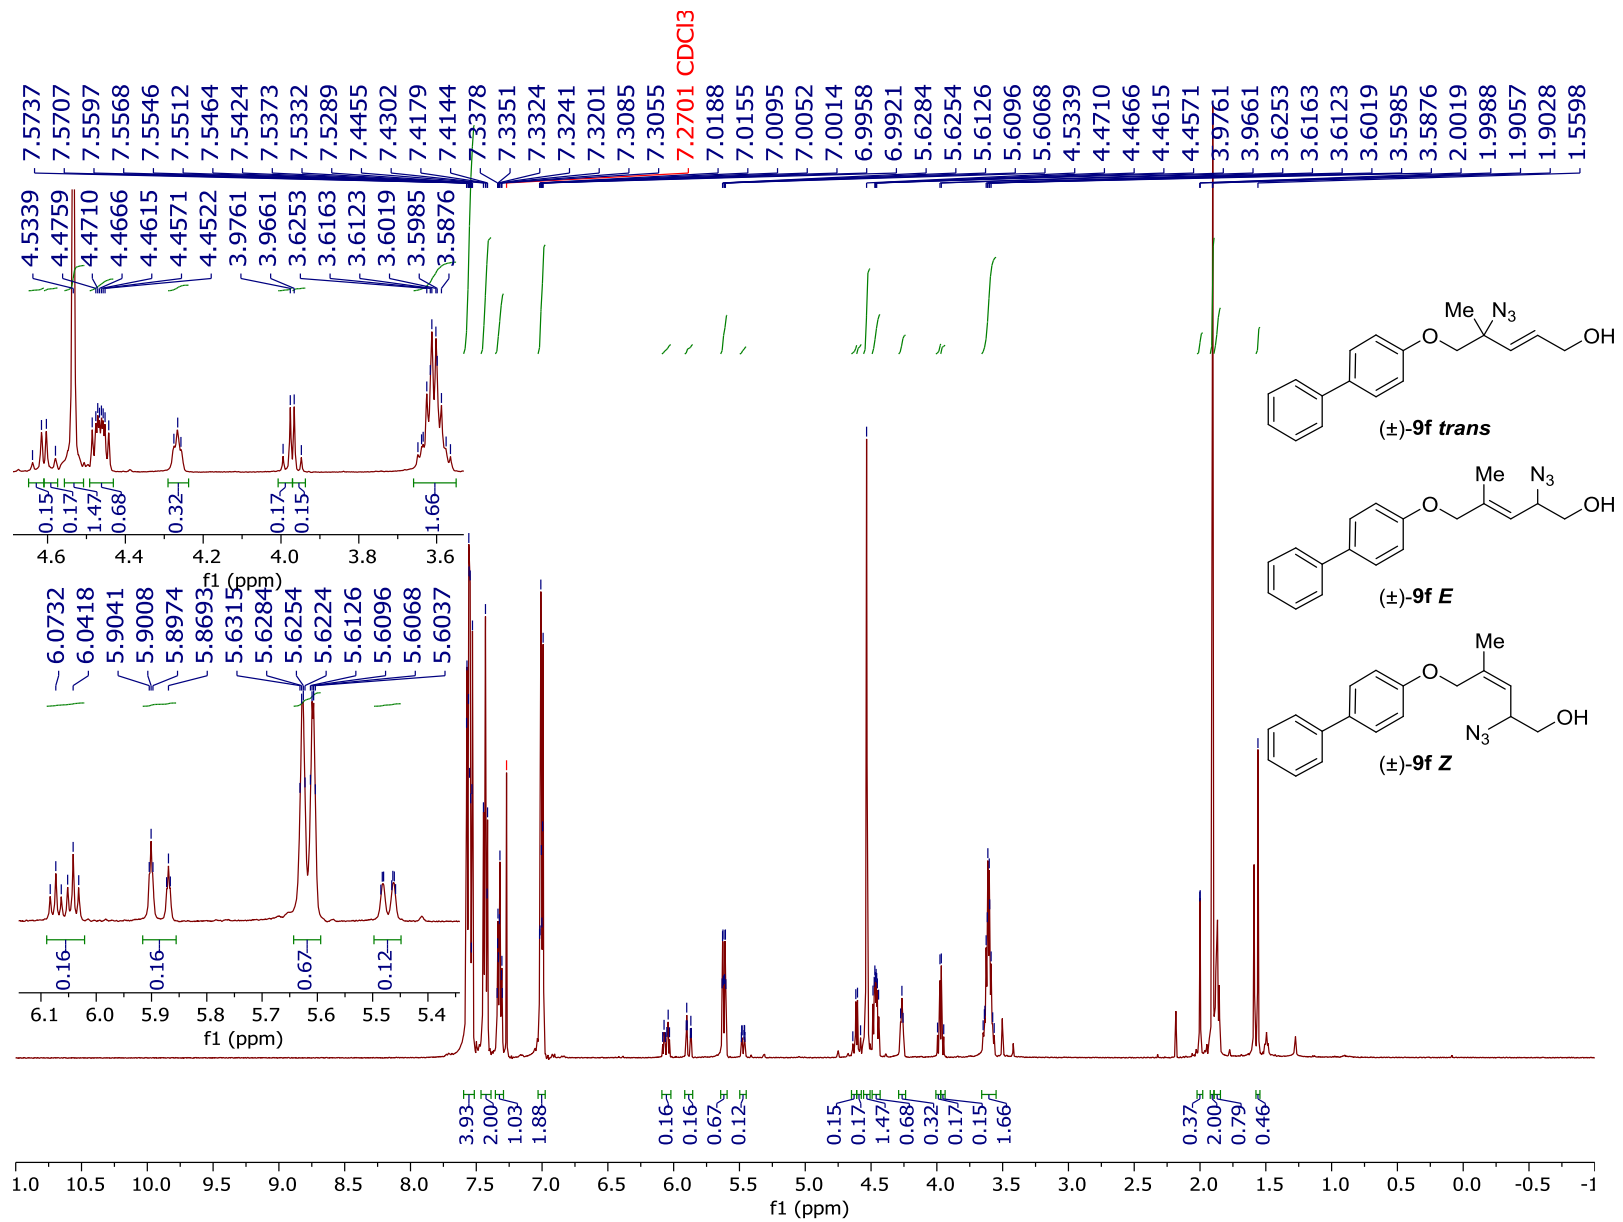

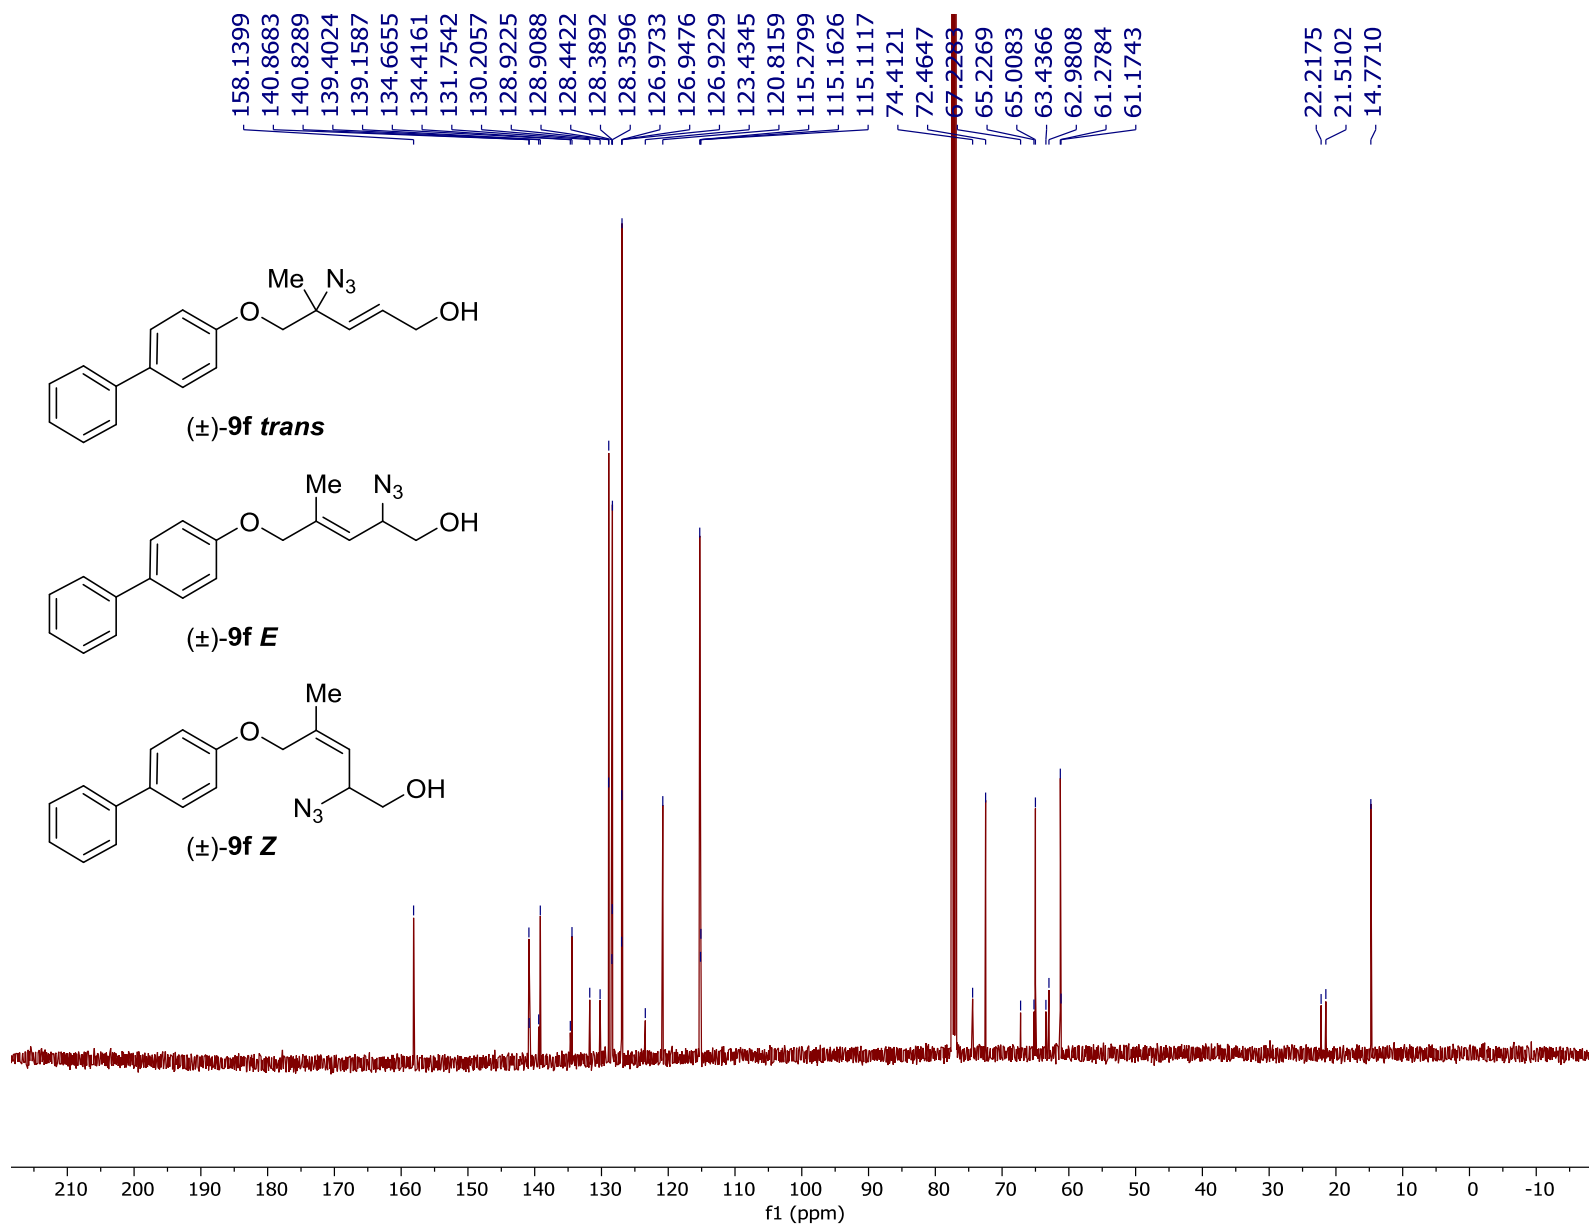

Compound 9f, 126 MHz <sup>13</sup>C NMR Spectrum in CDCl<sub>3</sub>

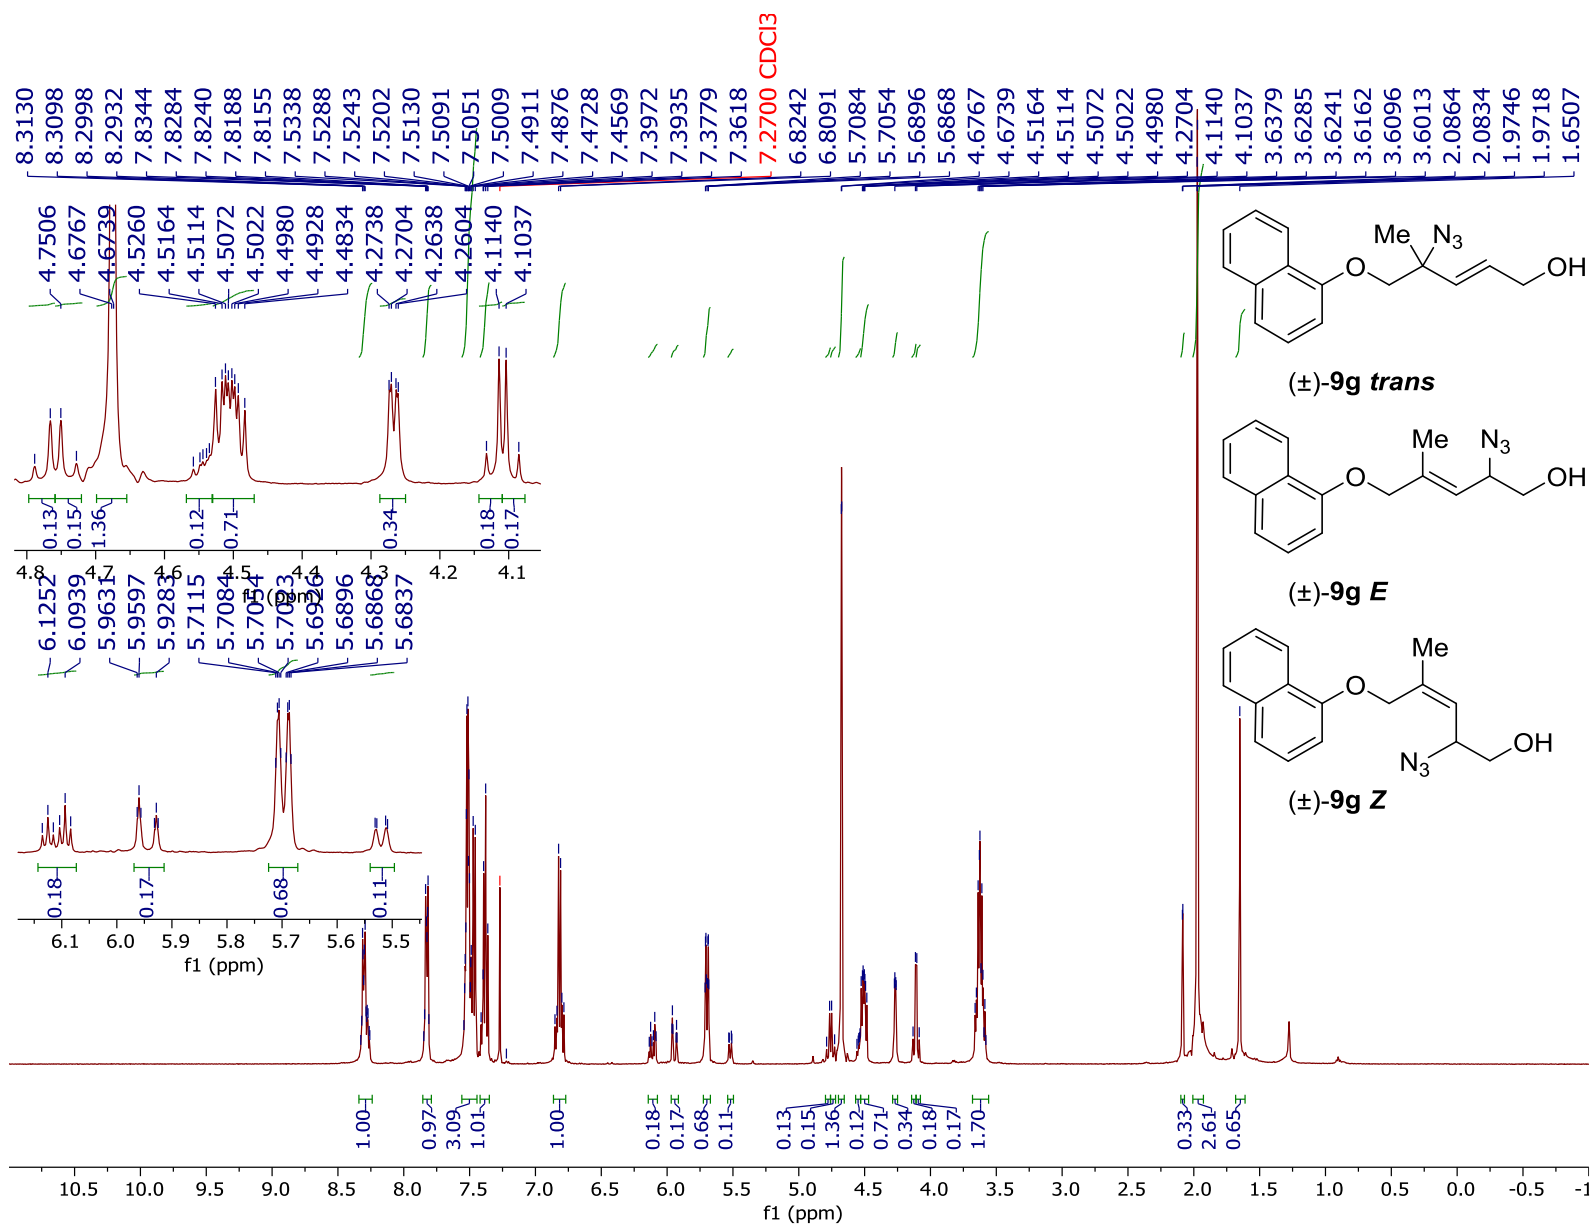

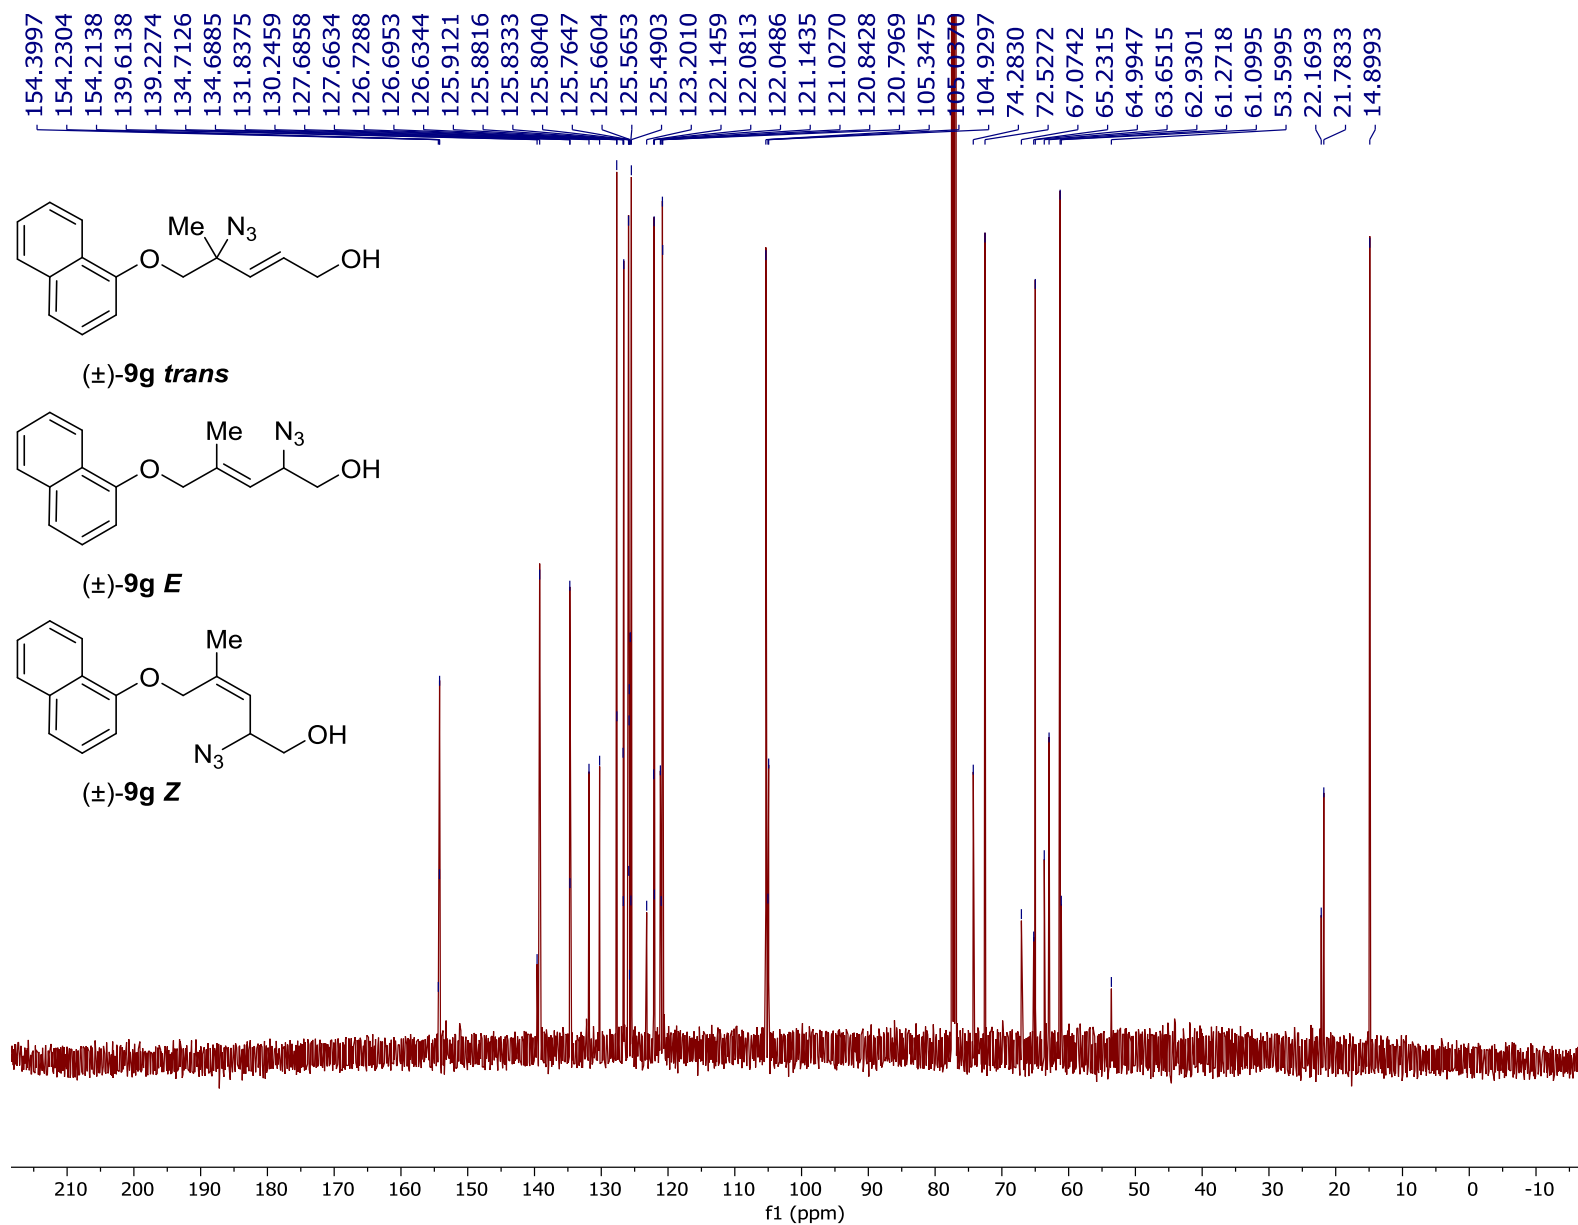

Compound 9g, 126 MHz <sup>13</sup>C NMR Spectrum in CDCl<sub>3</sub>

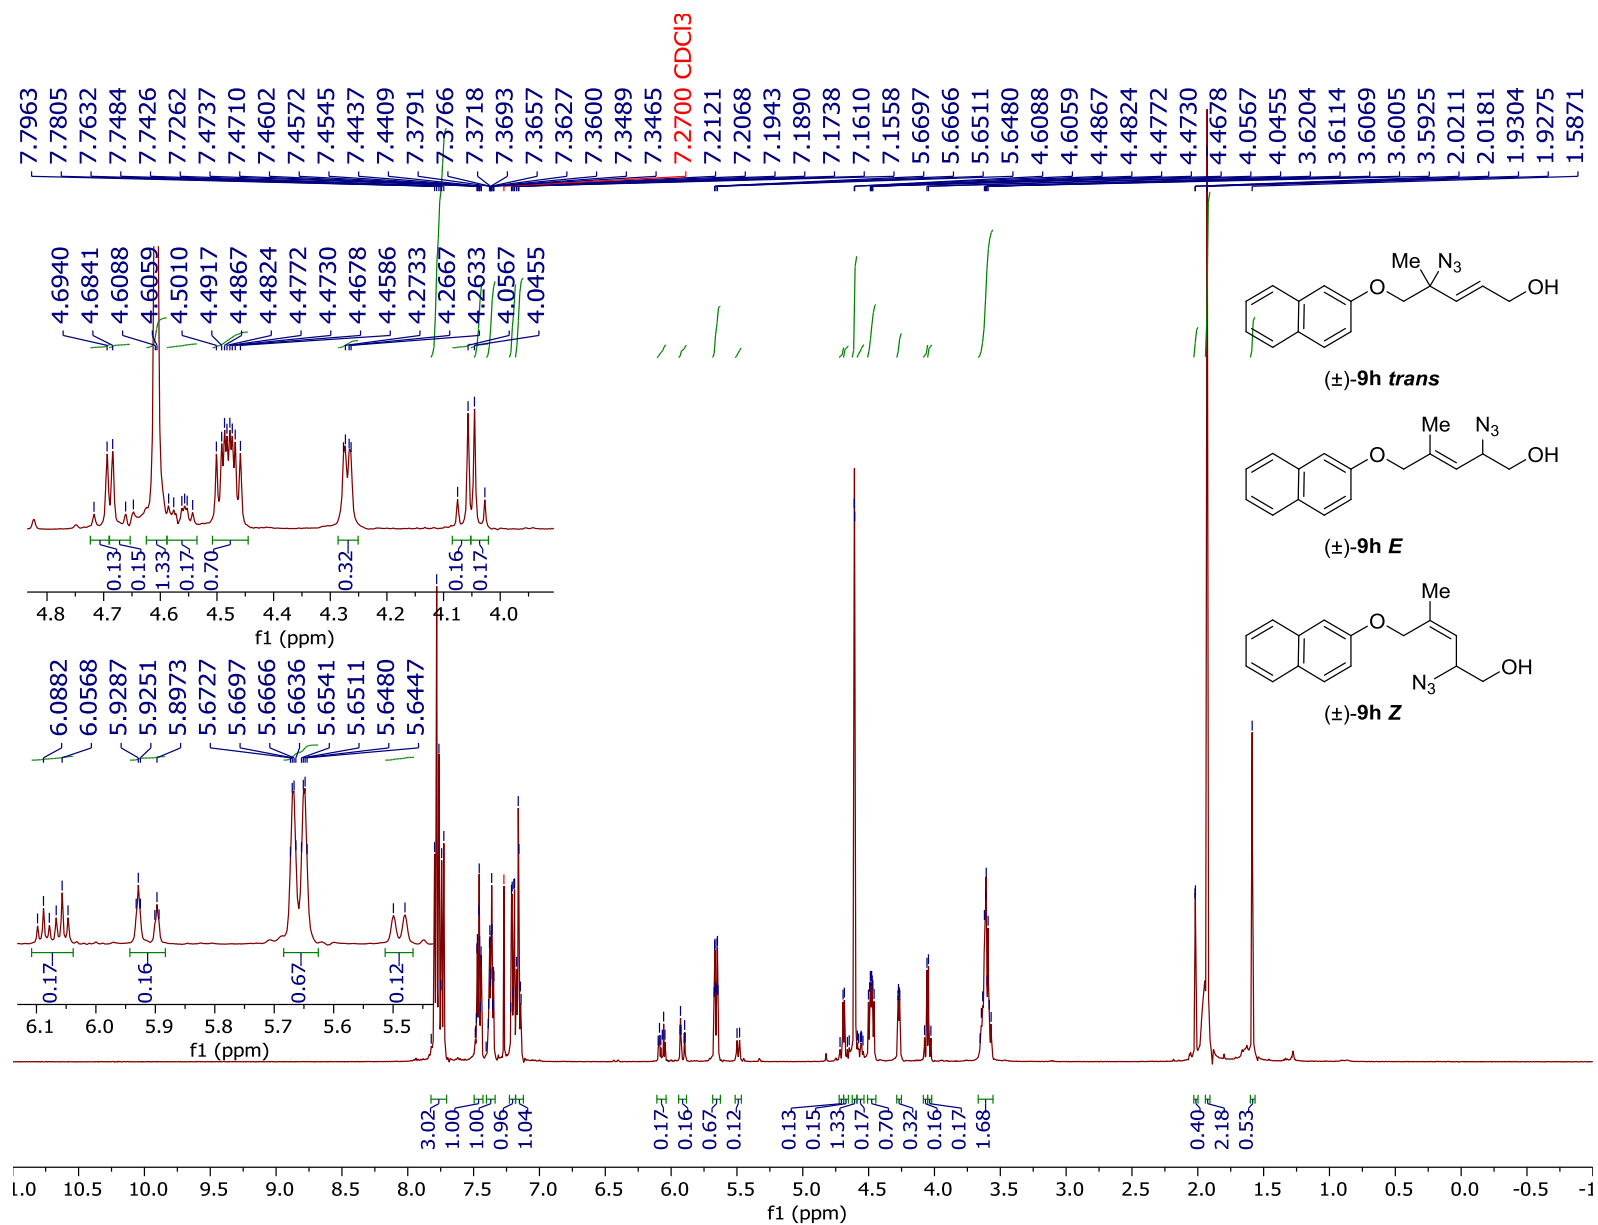

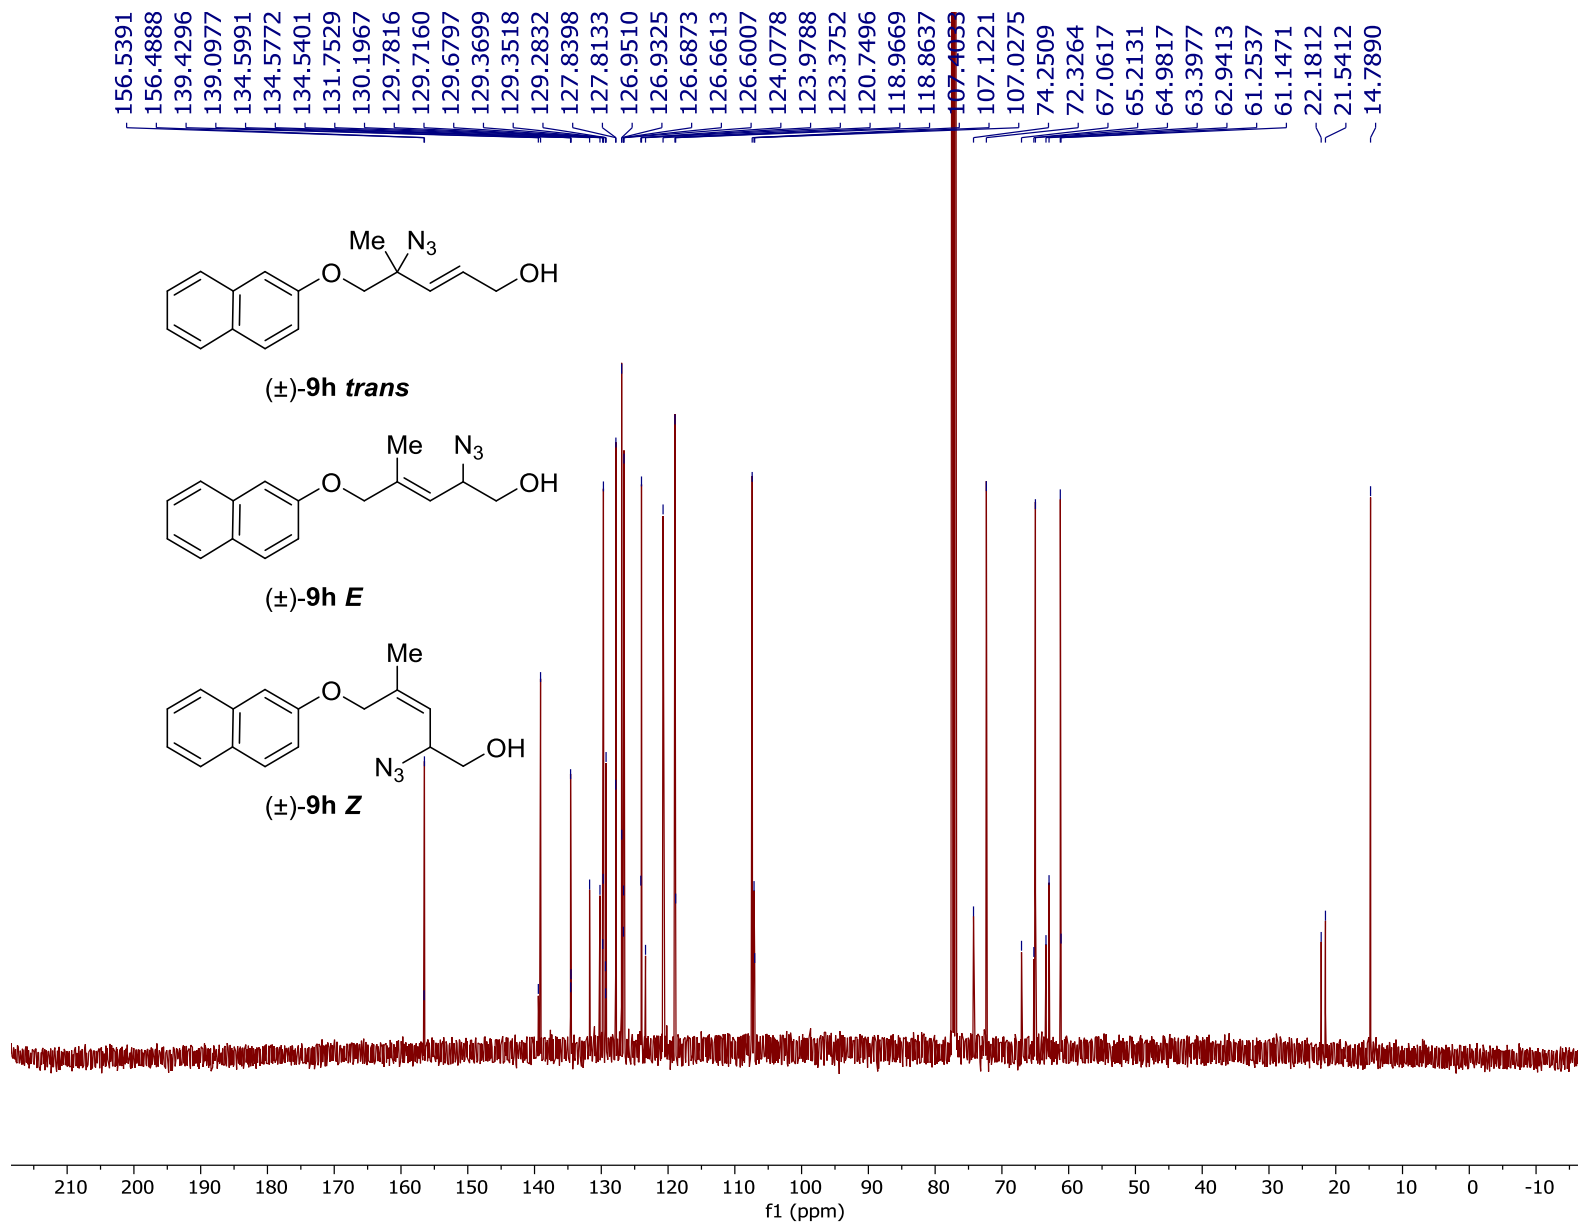

Compound 9h, 126 MHz <sup>13</sup>C NMR Spectrum in CDCl<sub>3</sub>

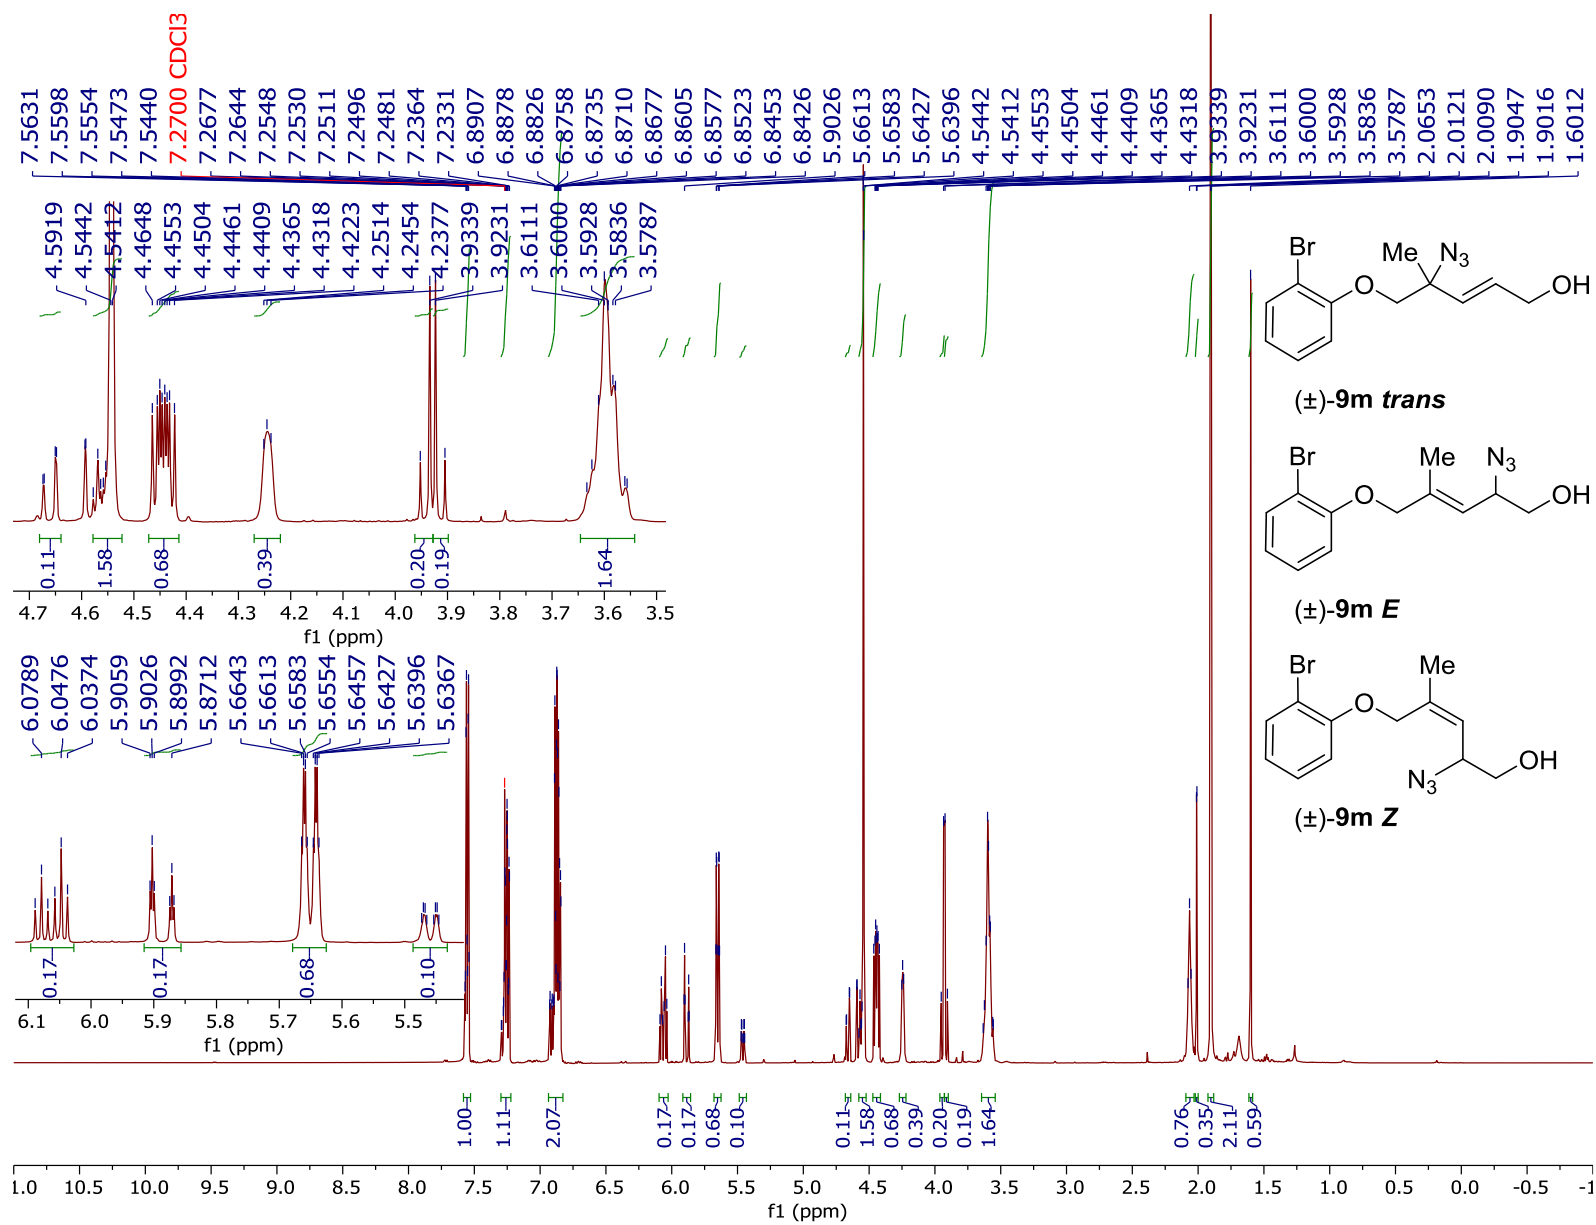

Compound 9m, 500 MHz <sup>1</sup>H NMR Spectrum in CDCl<sub>3</sub>



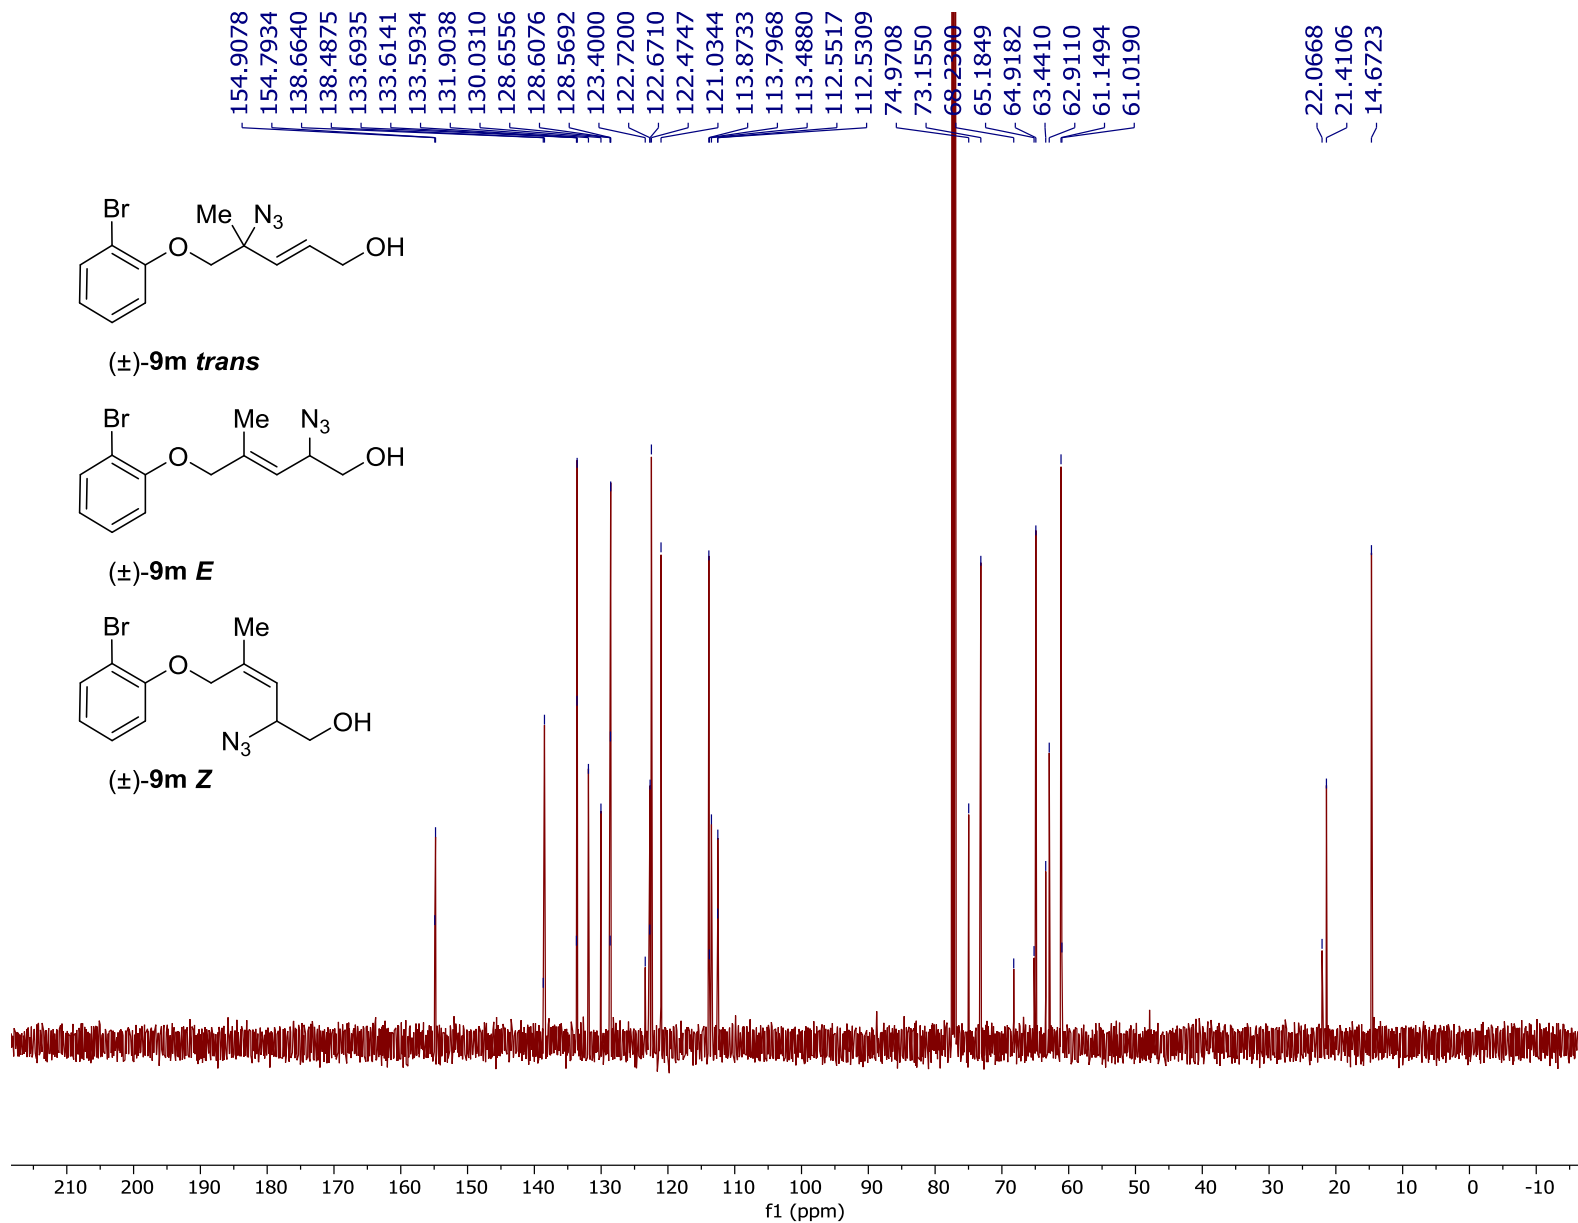

Compound 9m, 126 MHz <sup>13</sup>C NMR Spectrum in CDCl<sub>3</sub>



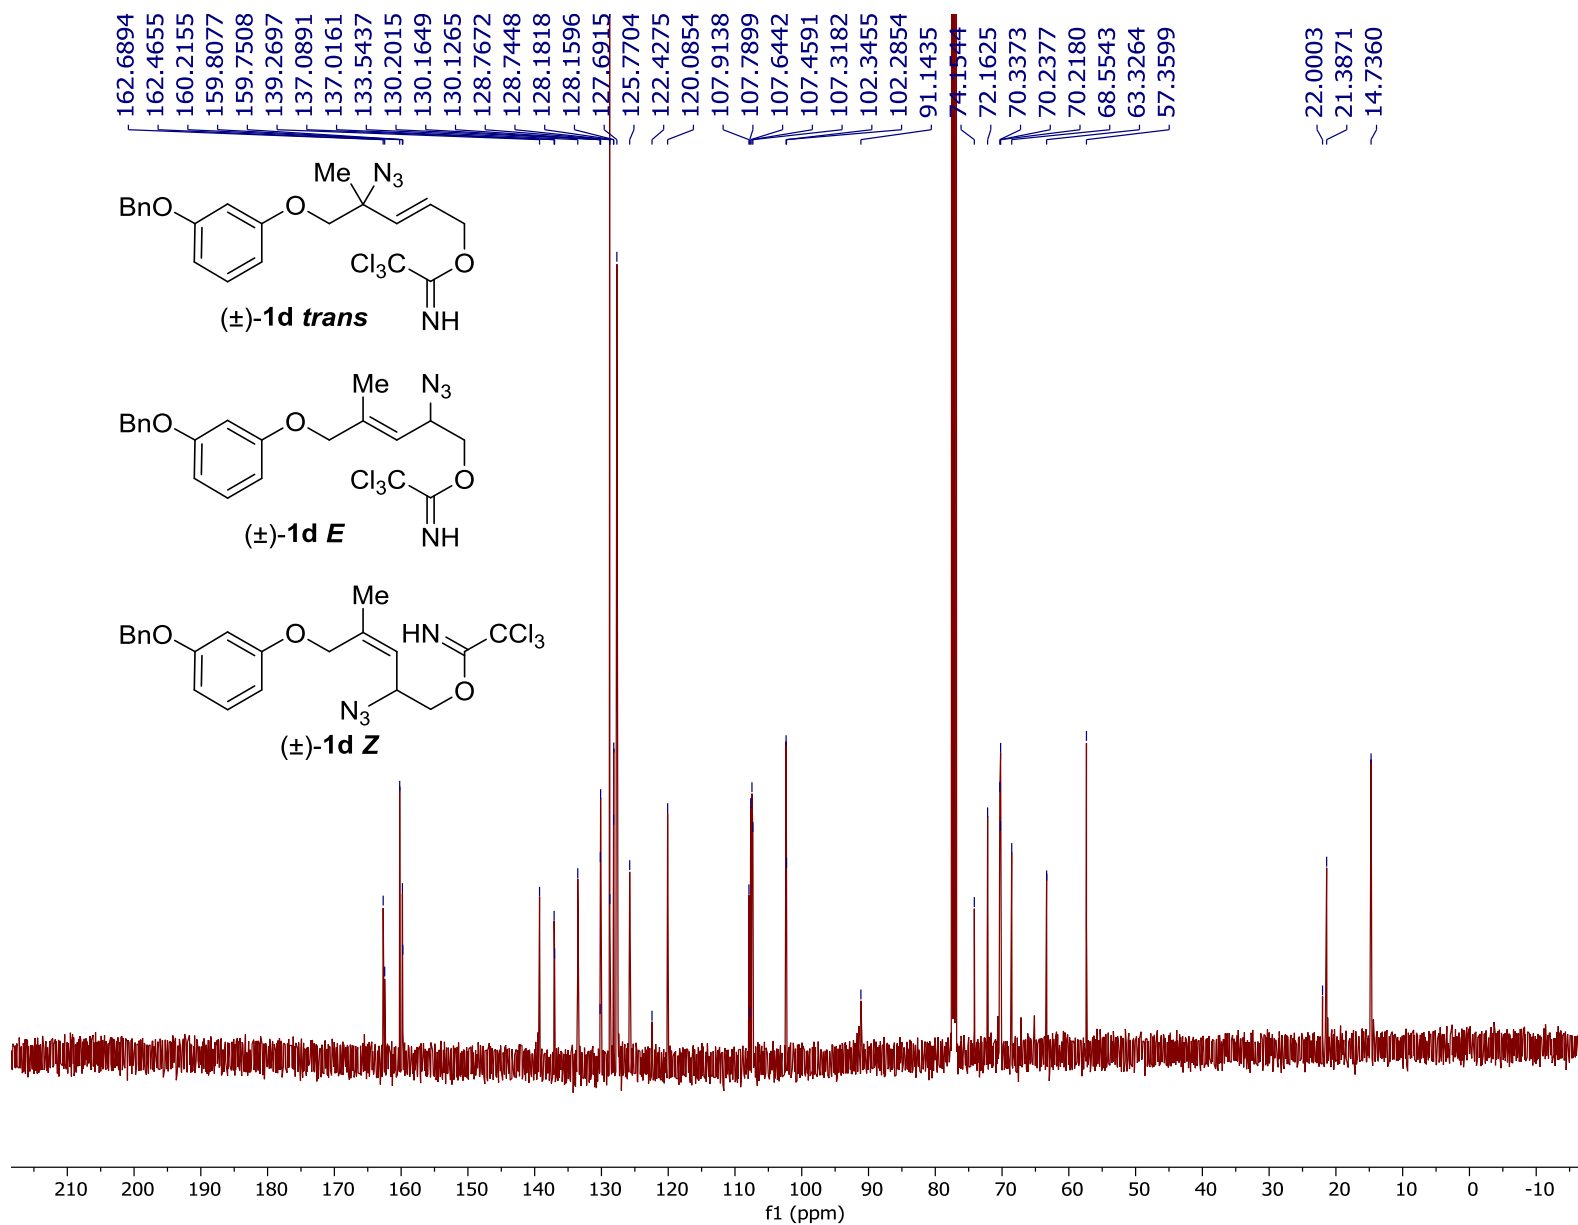

Compound 1d, 126 MHz  $^{13}\text{C}$  NMR Spectrum in  $\text{CDCl}_3$

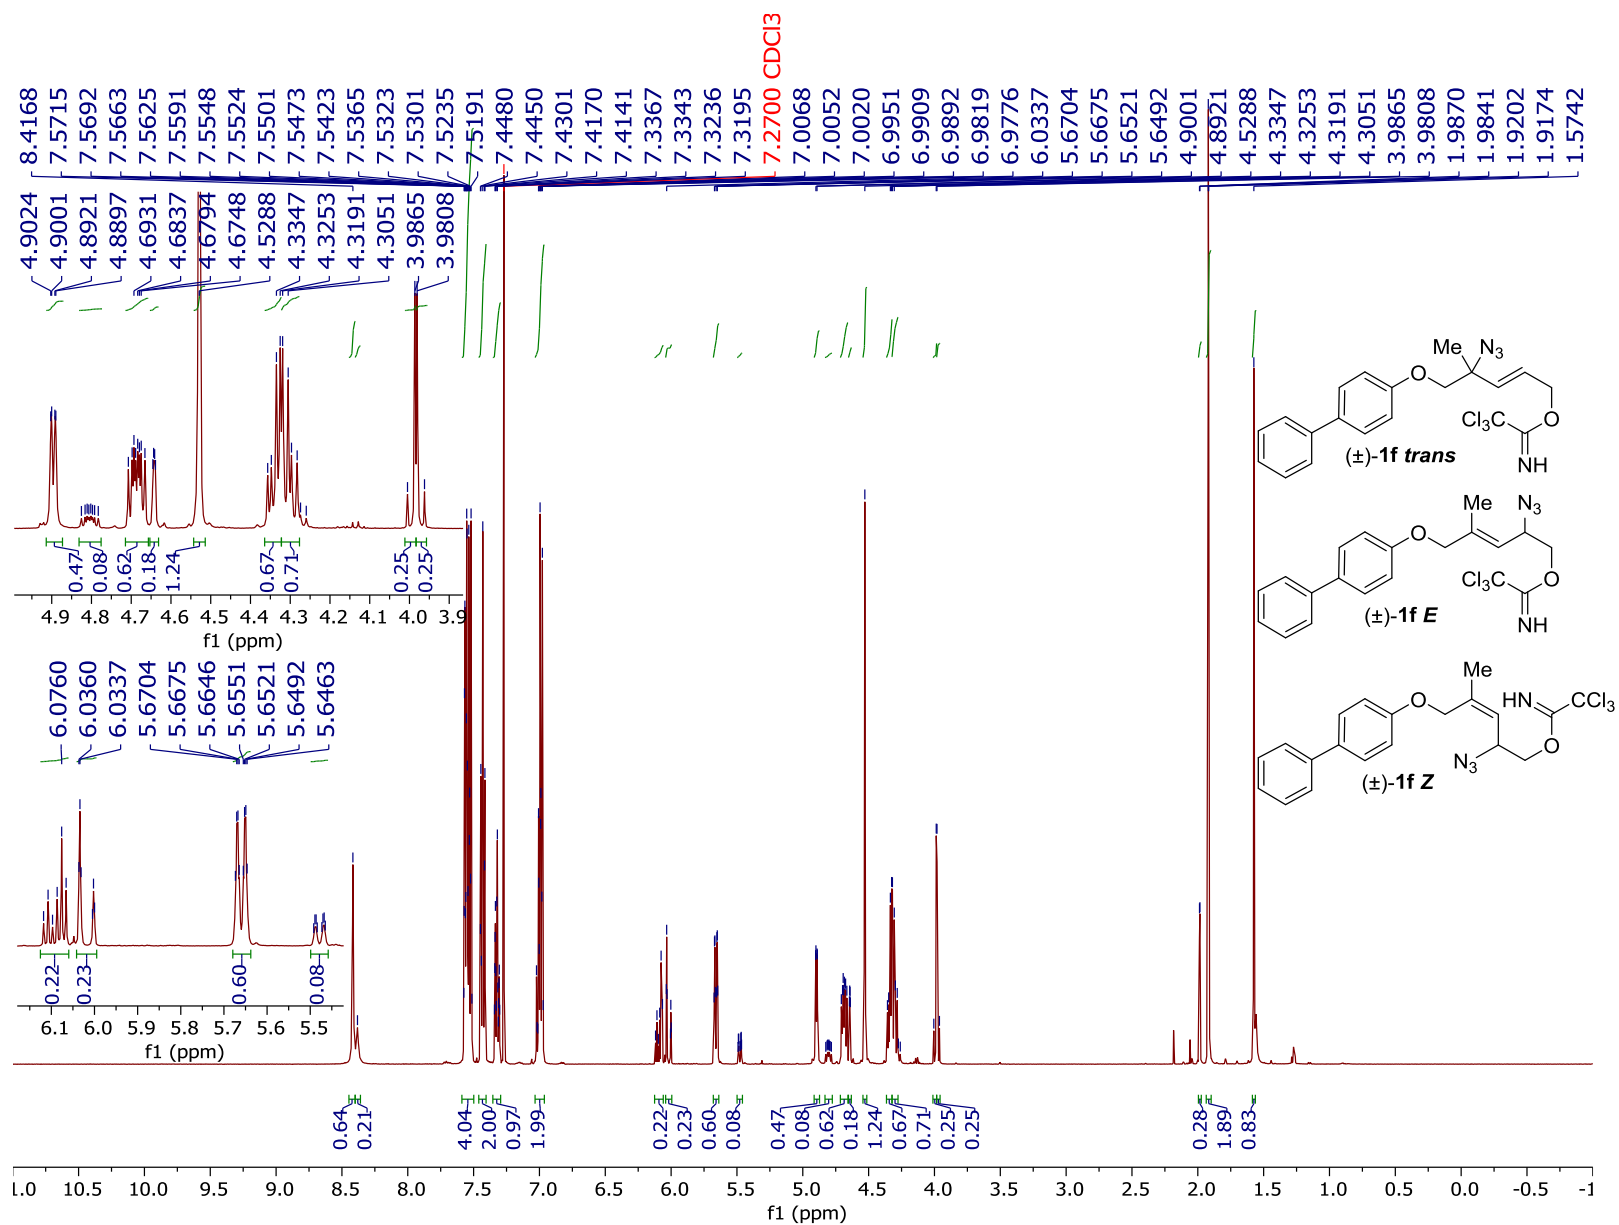

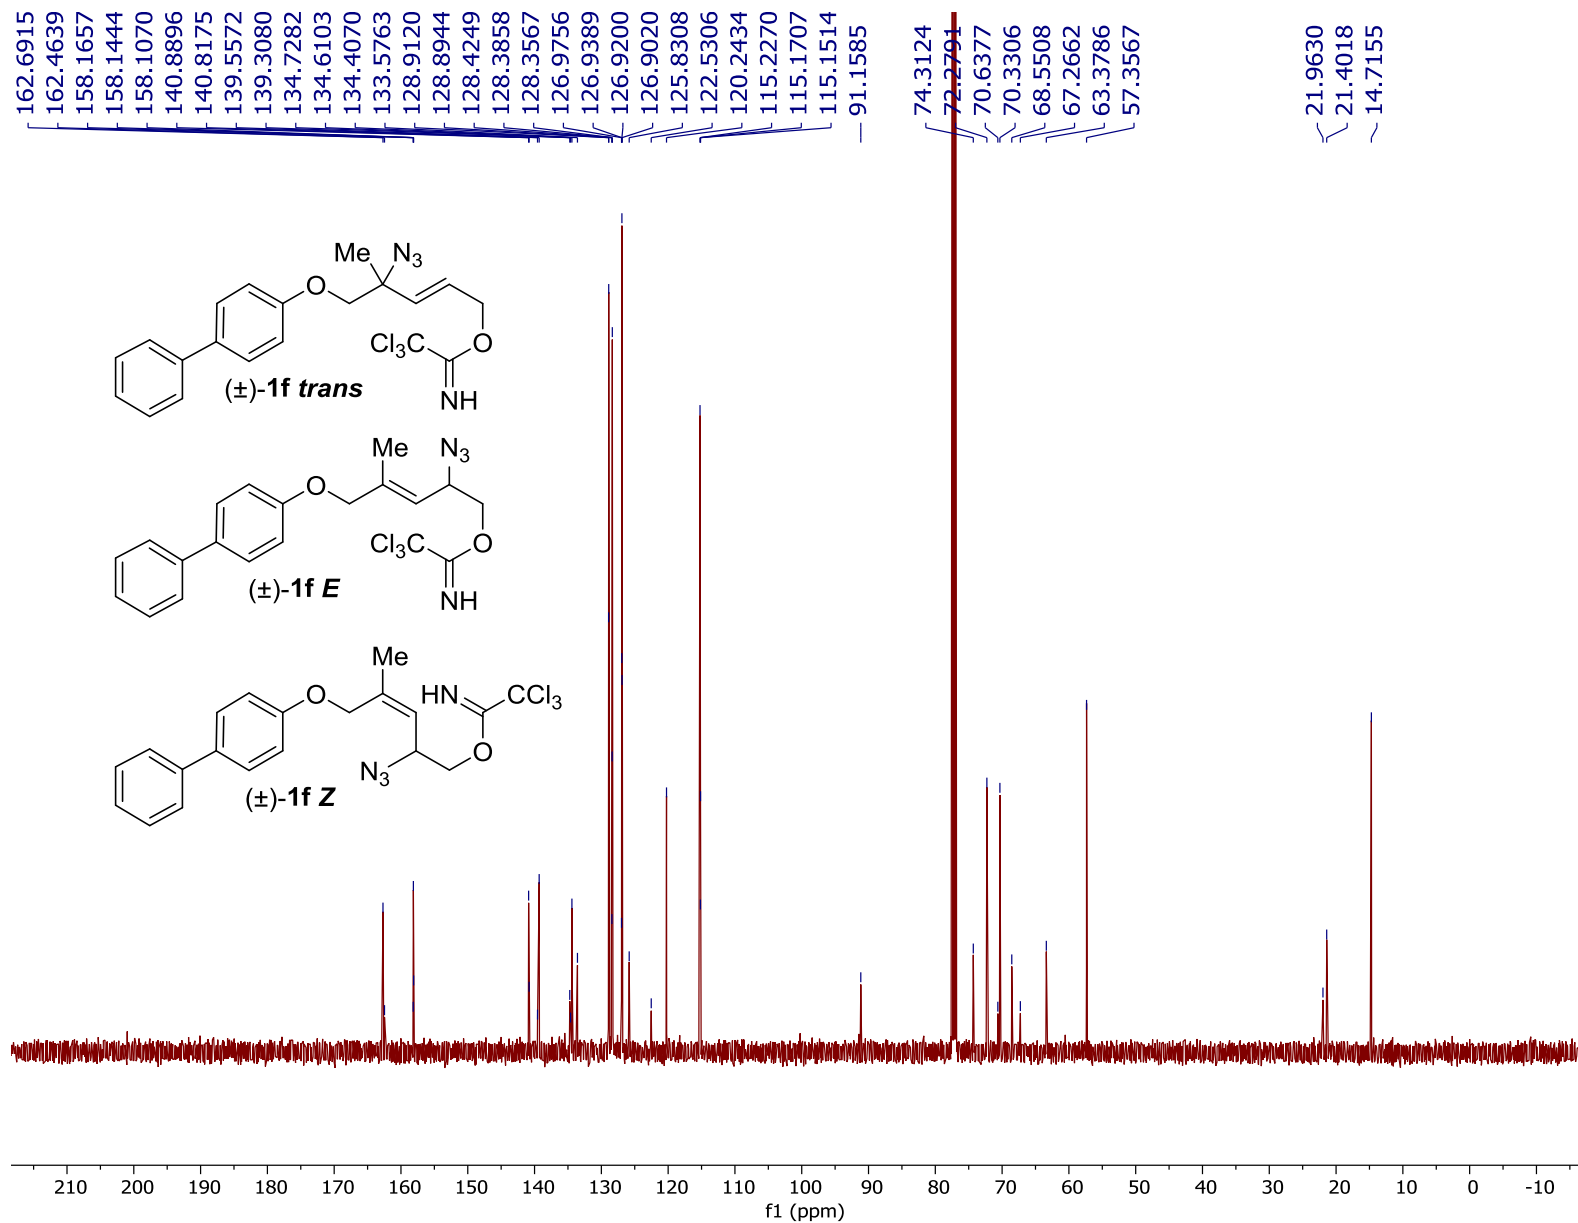

Compound 1f, 126 MHz <sup>13</sup>C NMR Spectrum in CDCl<sub>3</sub>

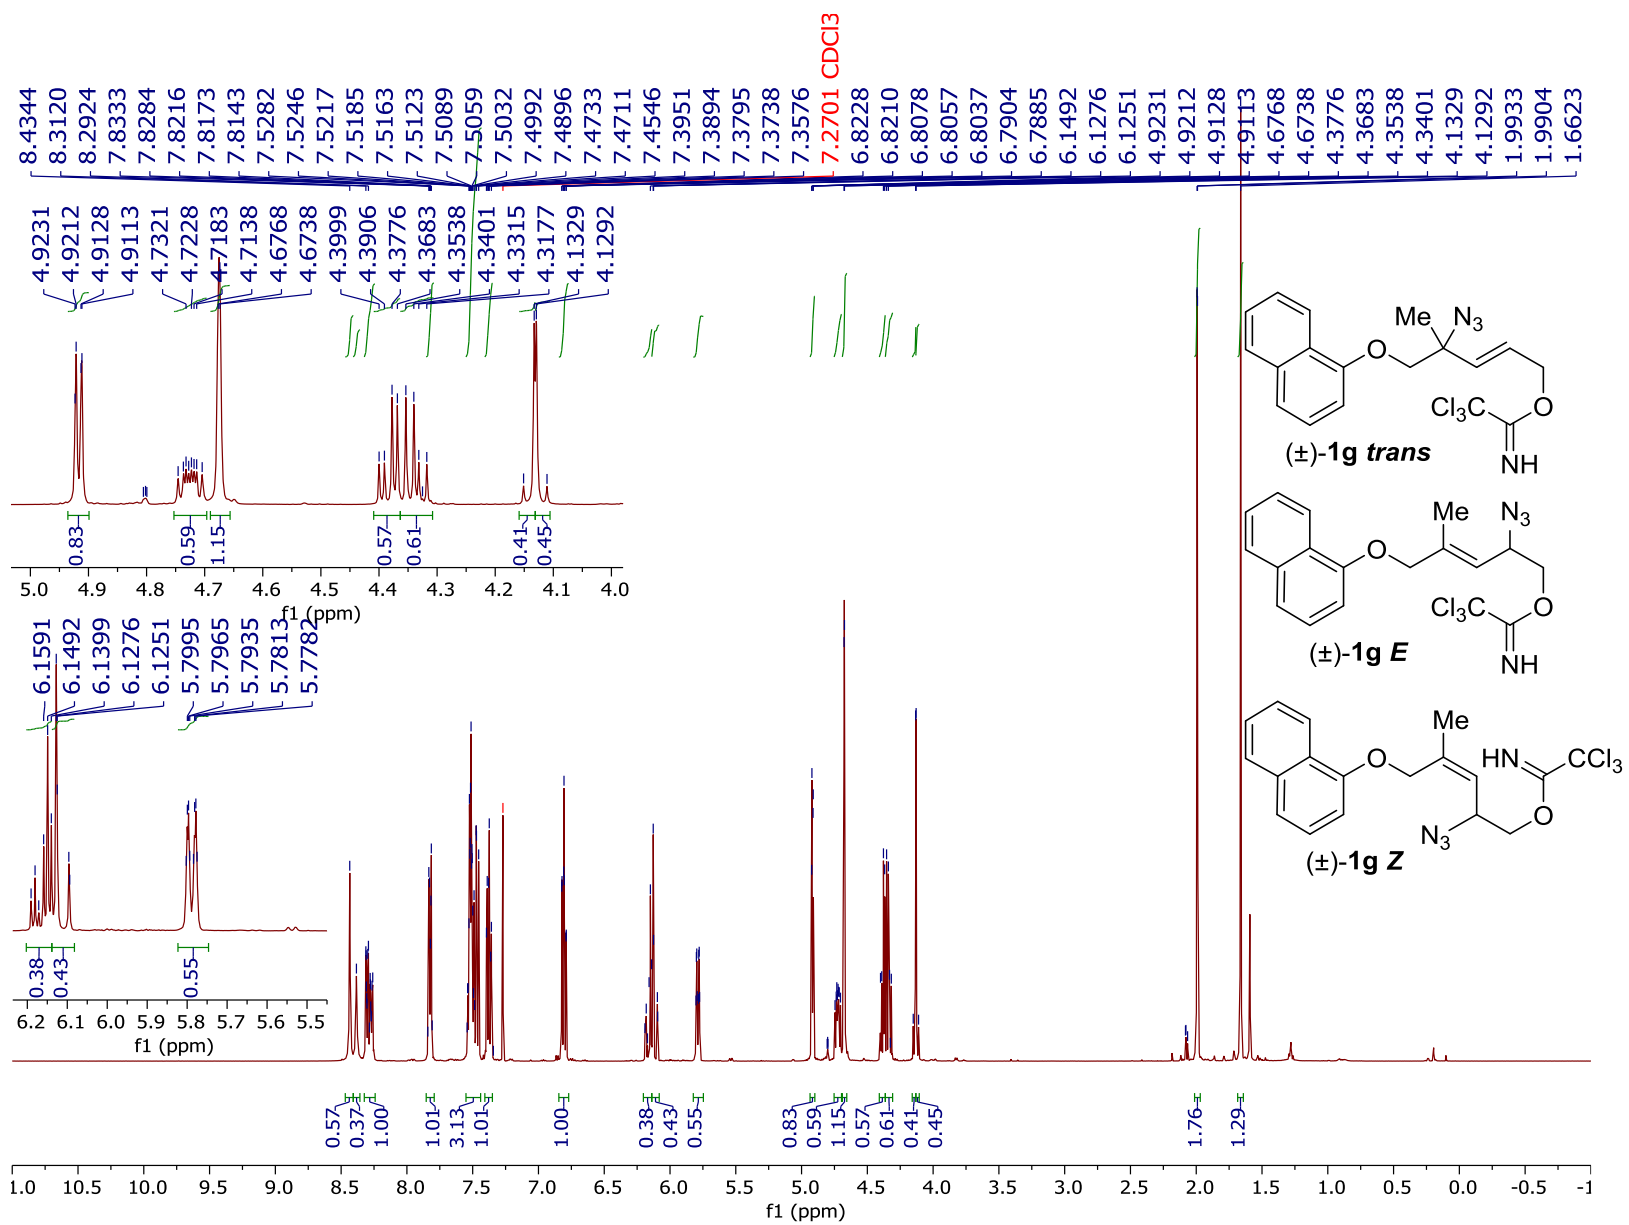

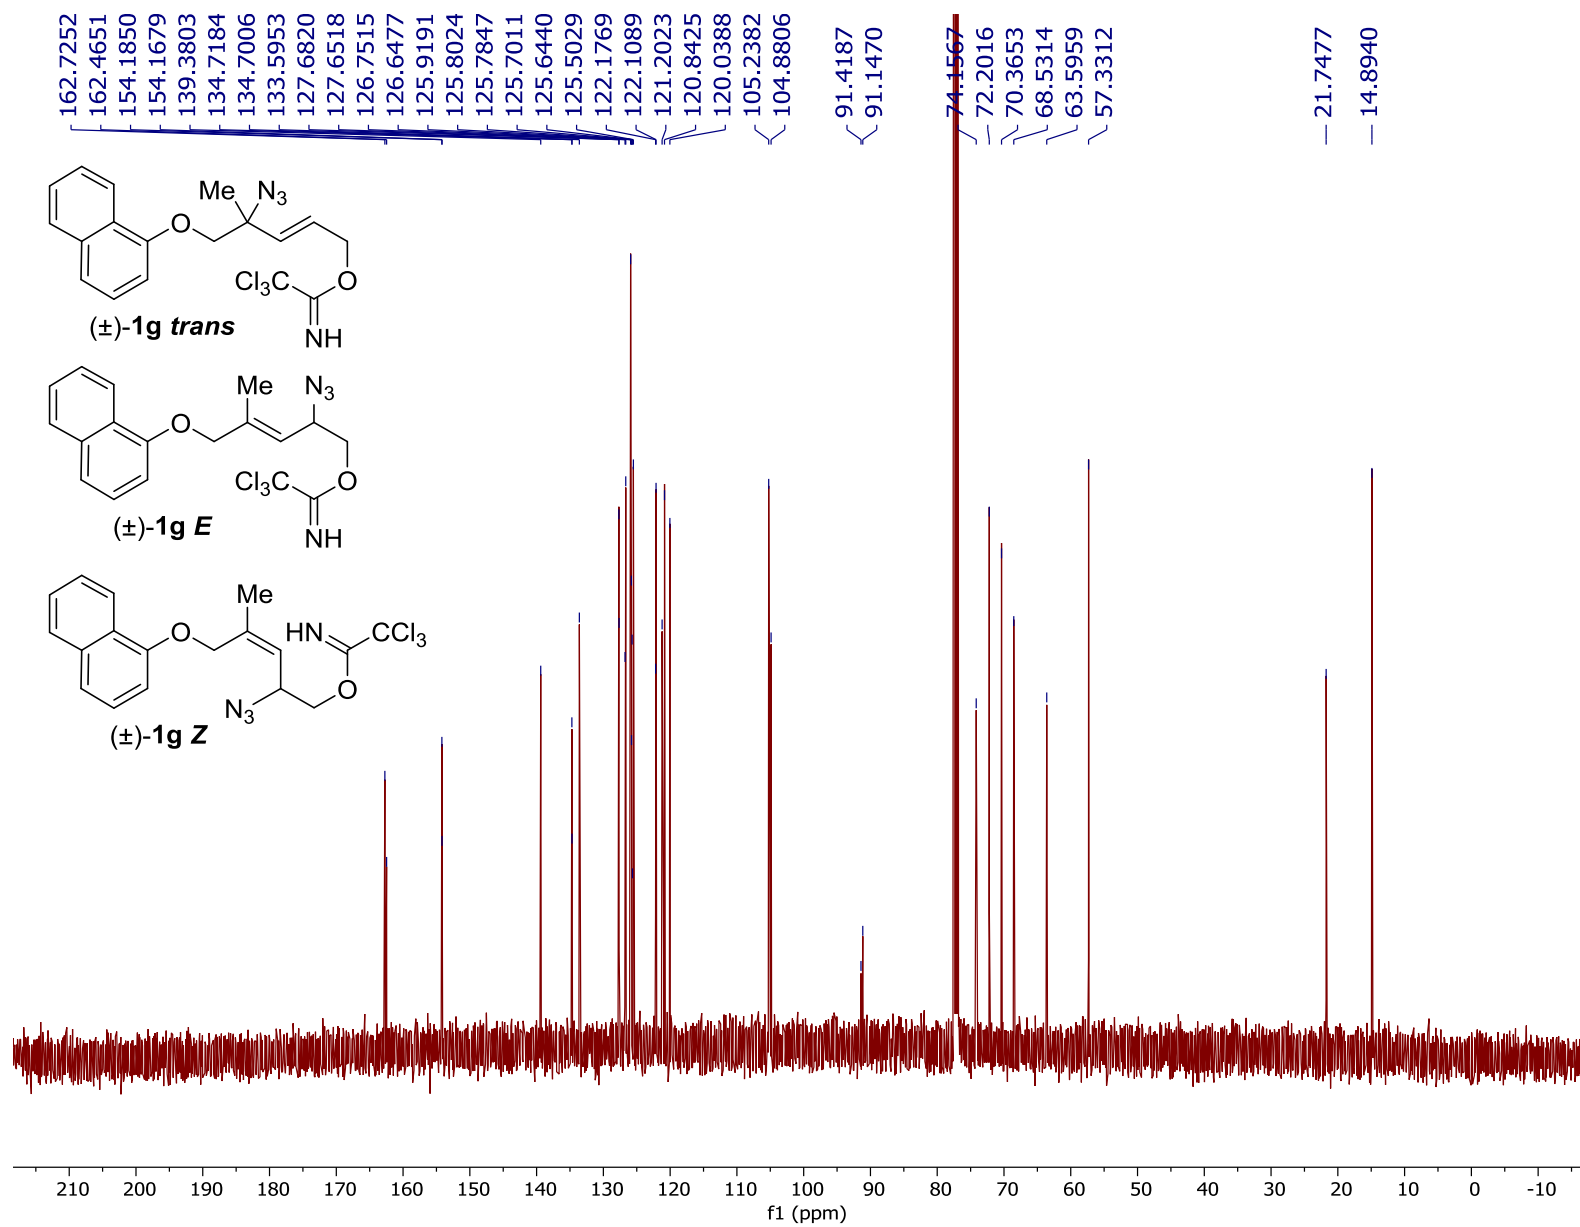

Compound 1g, 126 MHz <sup>13</sup>C NMR Spectrum in CDCl<sub>3</sub>





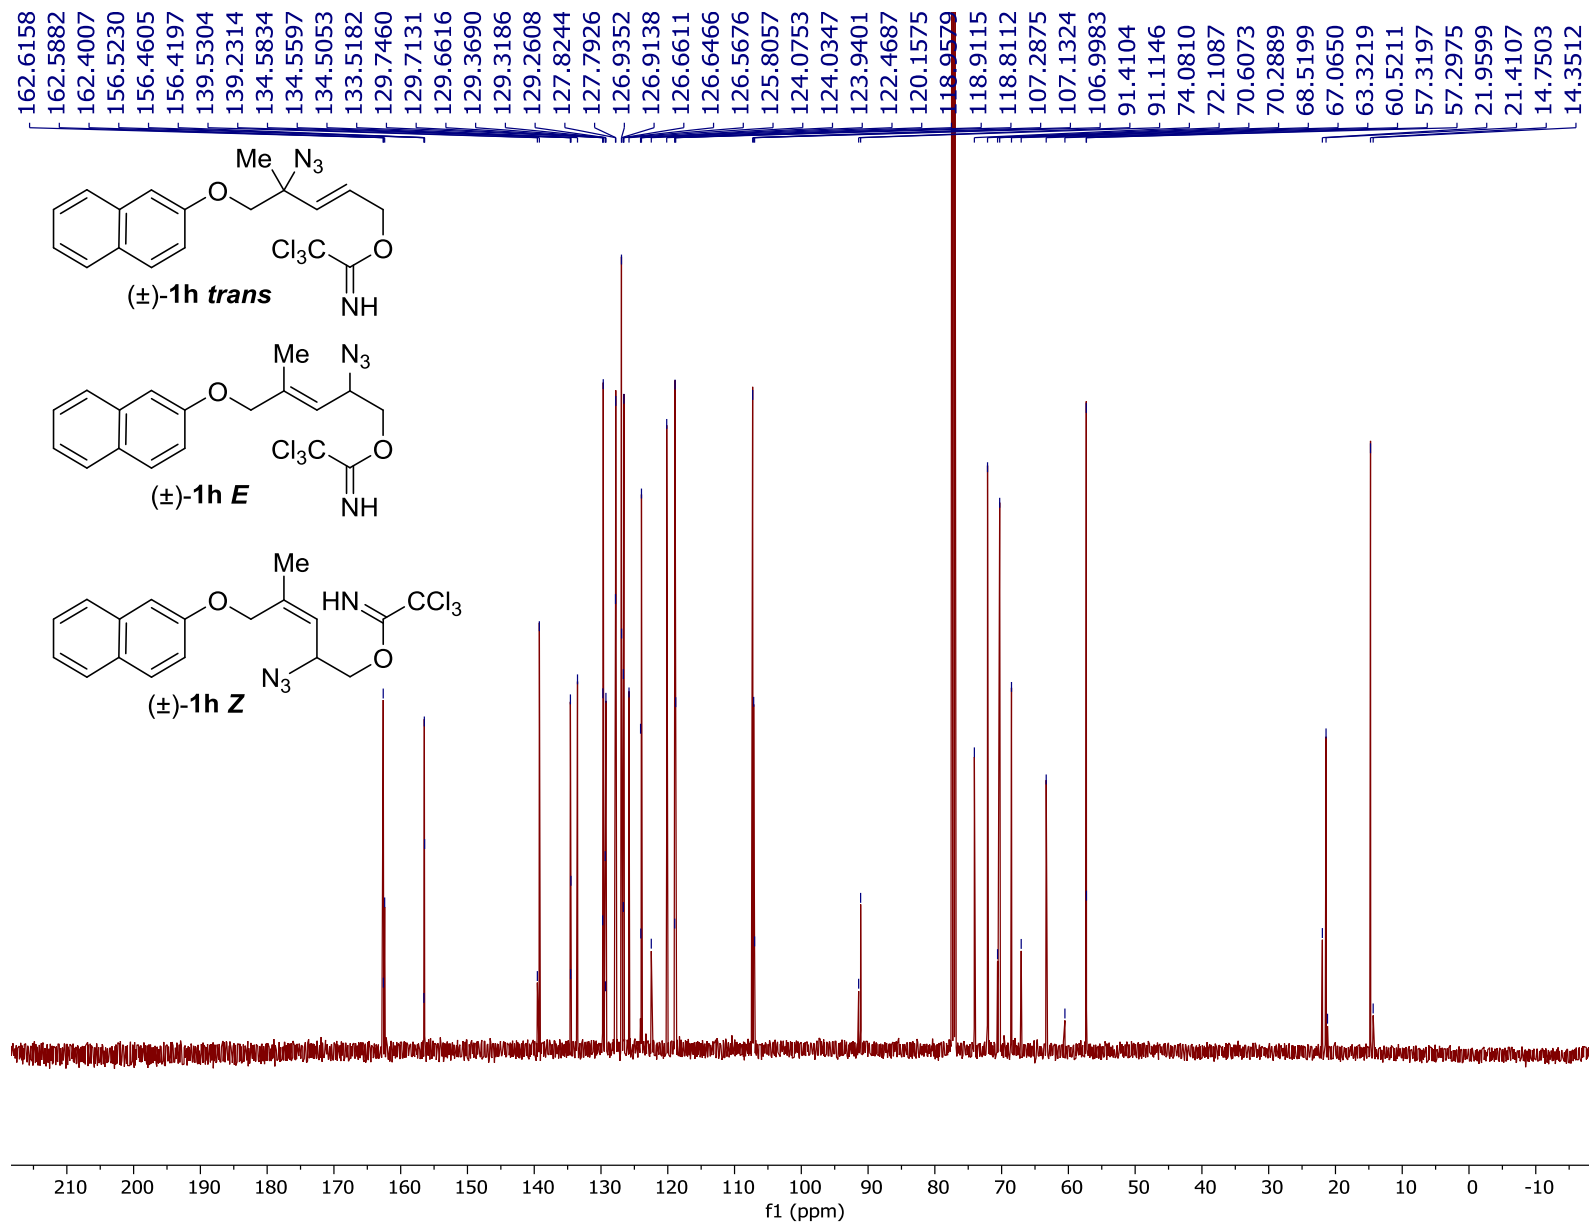

Compound 1h, 126 MHz  $^{13}\text{C}$  NMR Spectrum in  $\text{CDCl}_3$

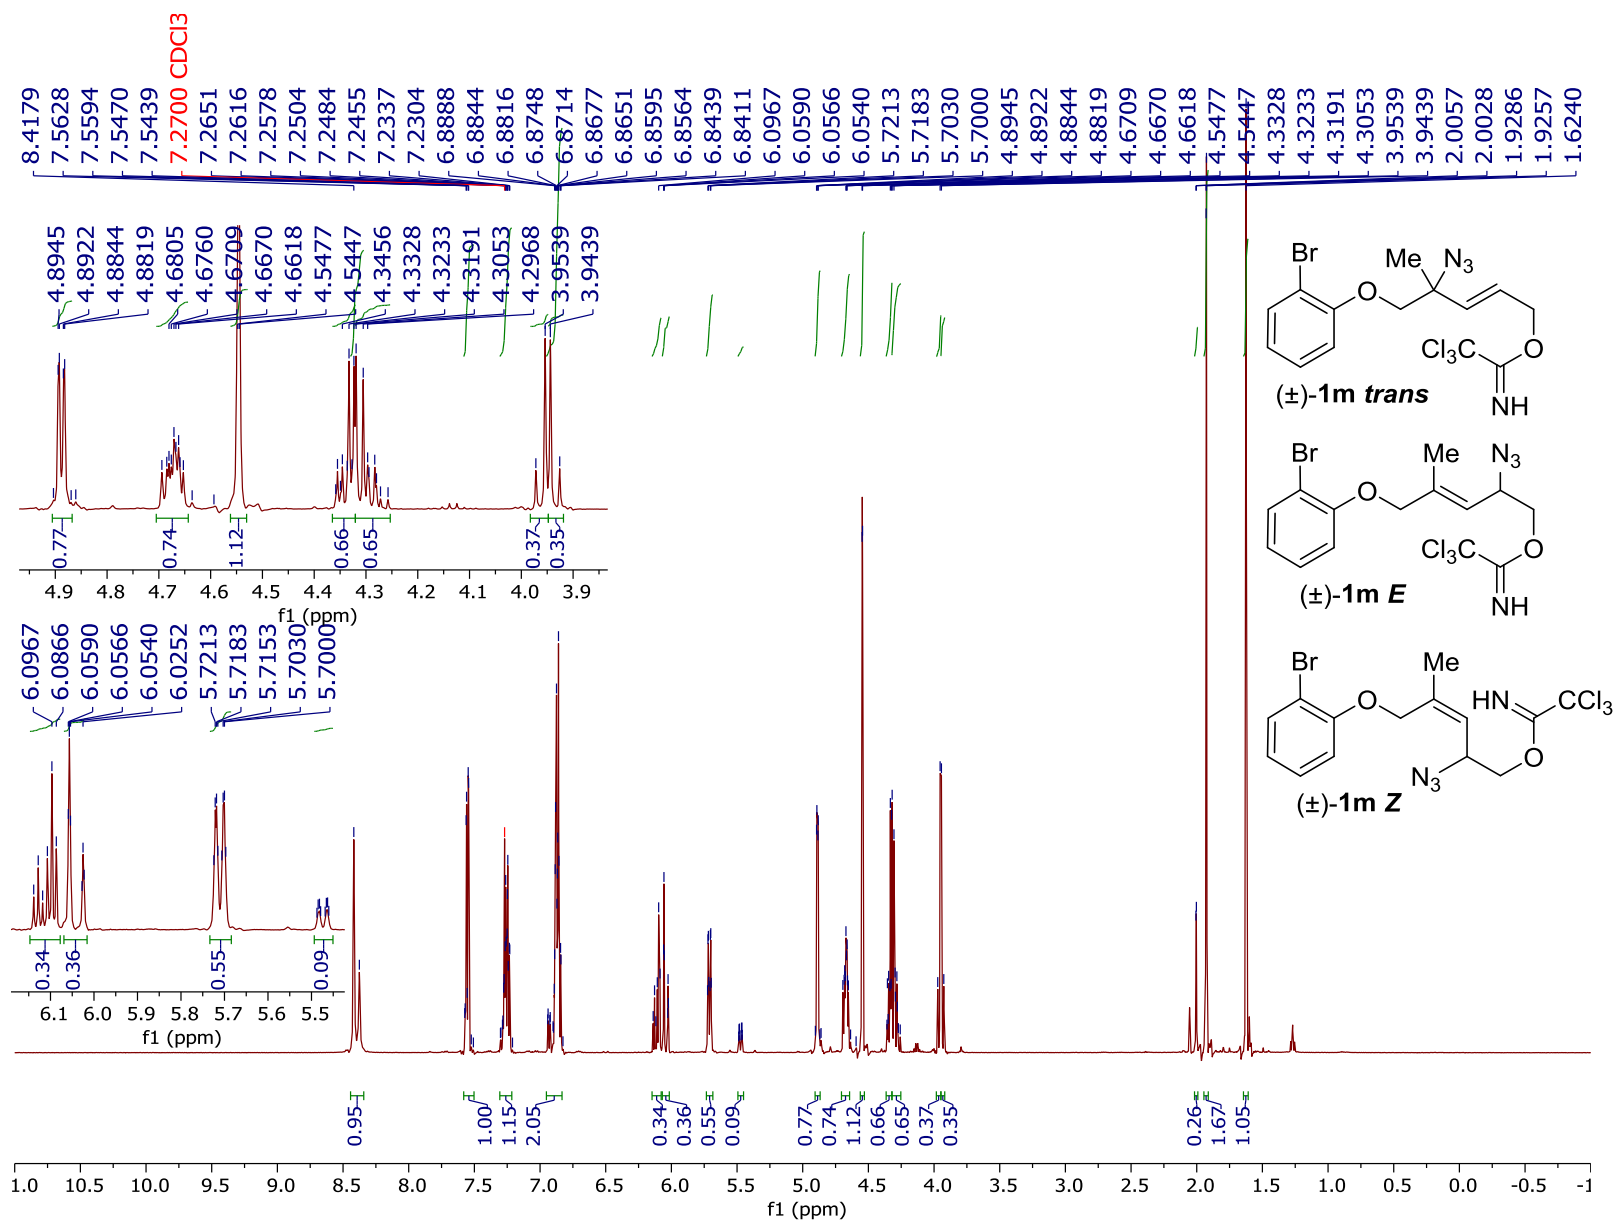

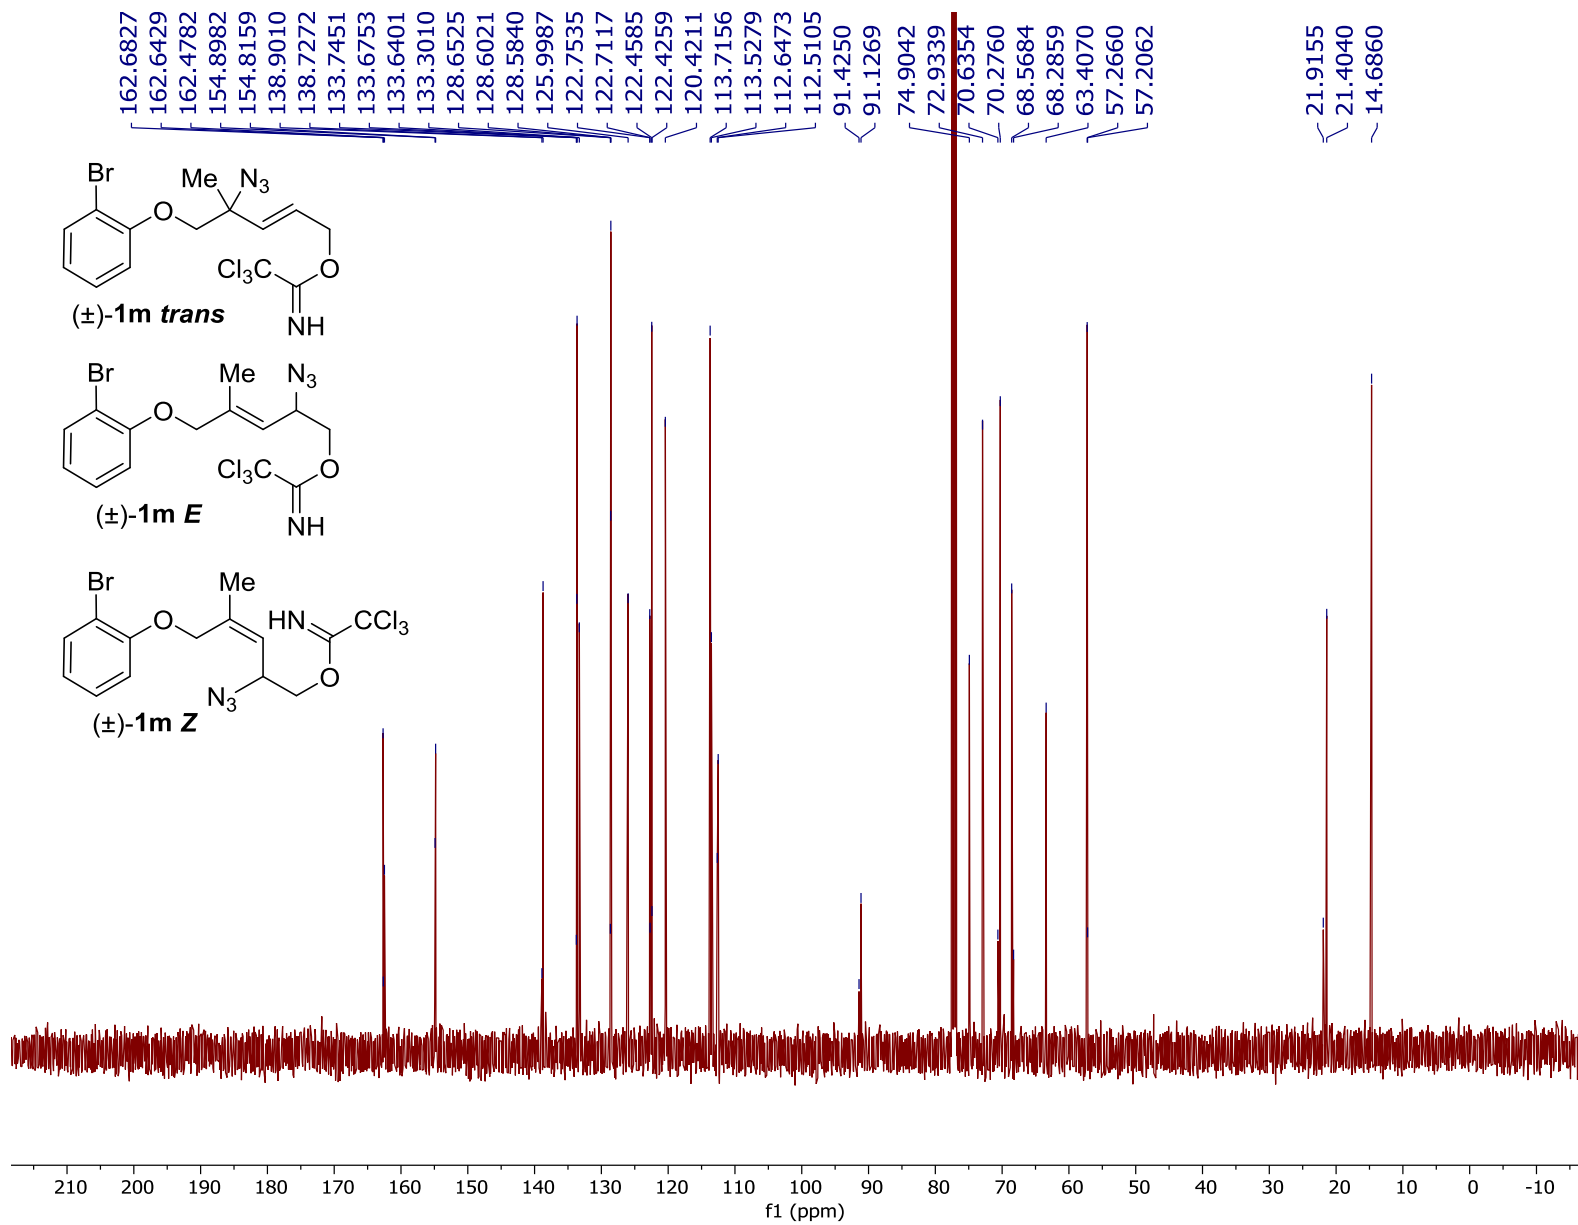

Compound 1m, 126 MHz <sup>13</sup>C NMR Spectrum in CDCl<sub>3</sub>

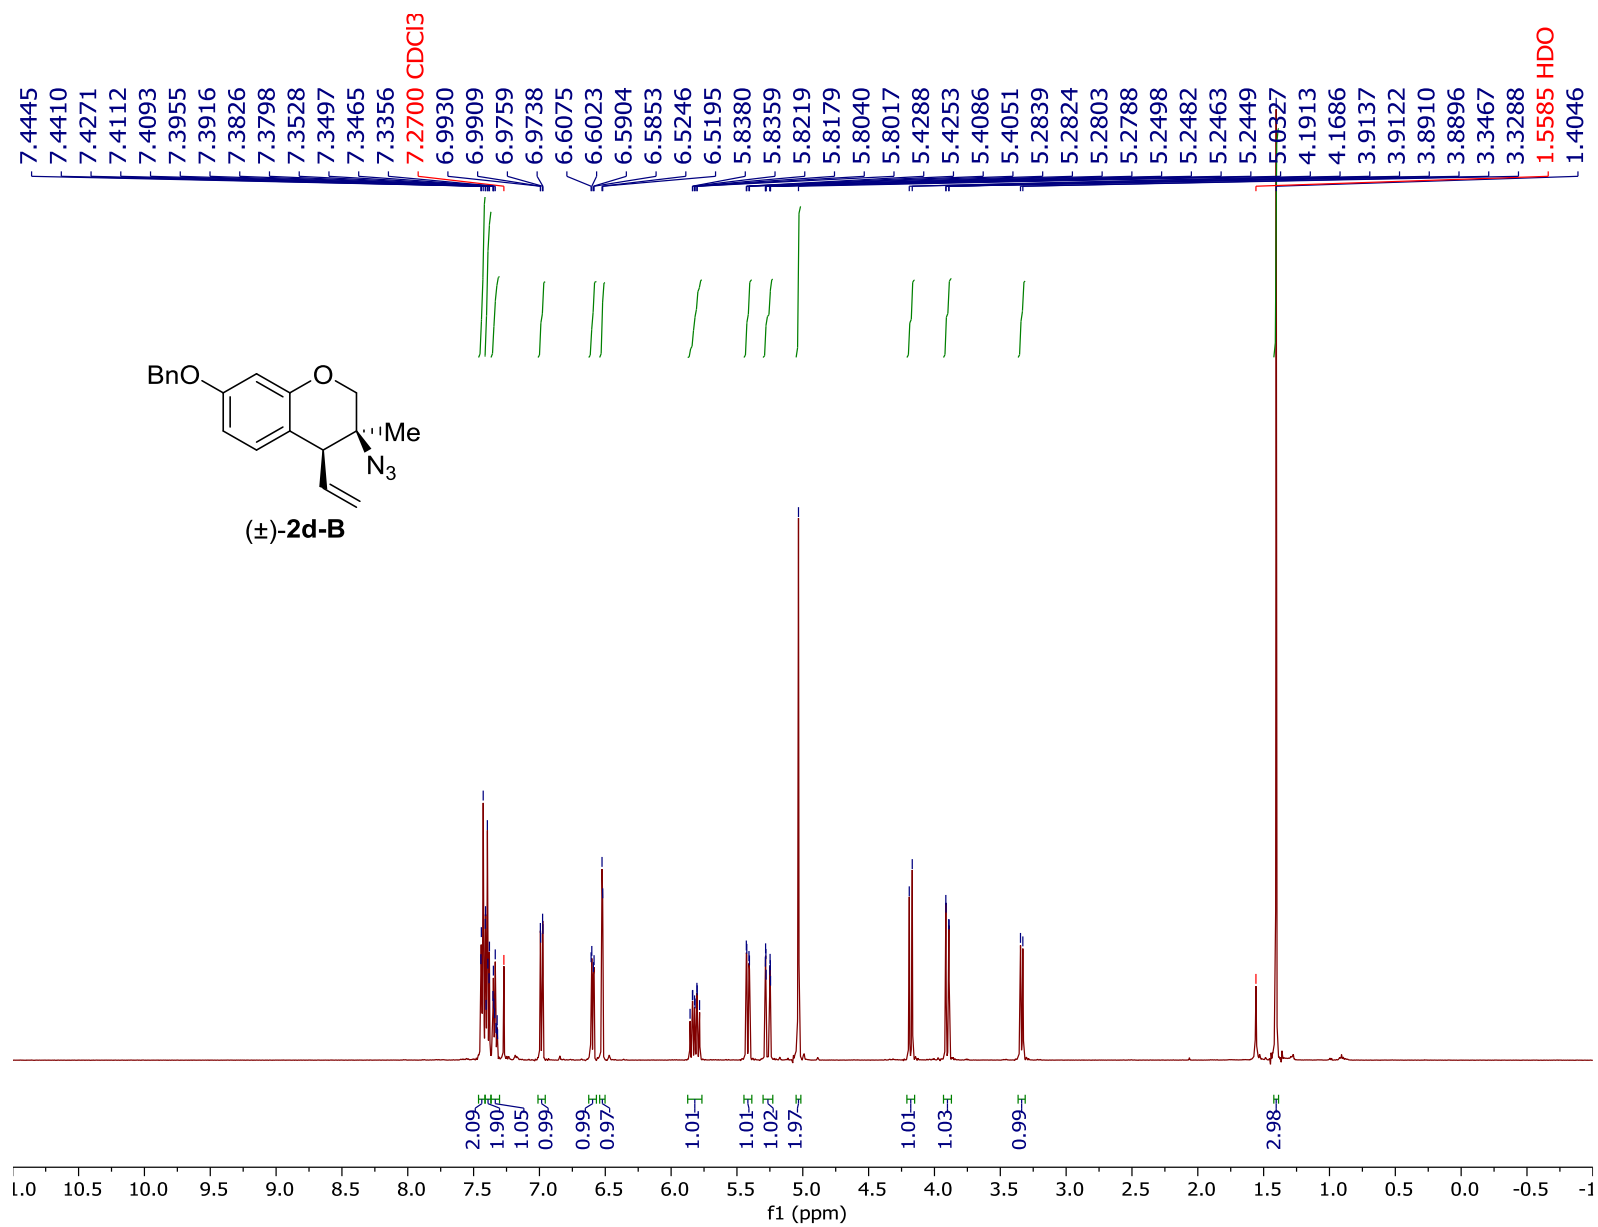

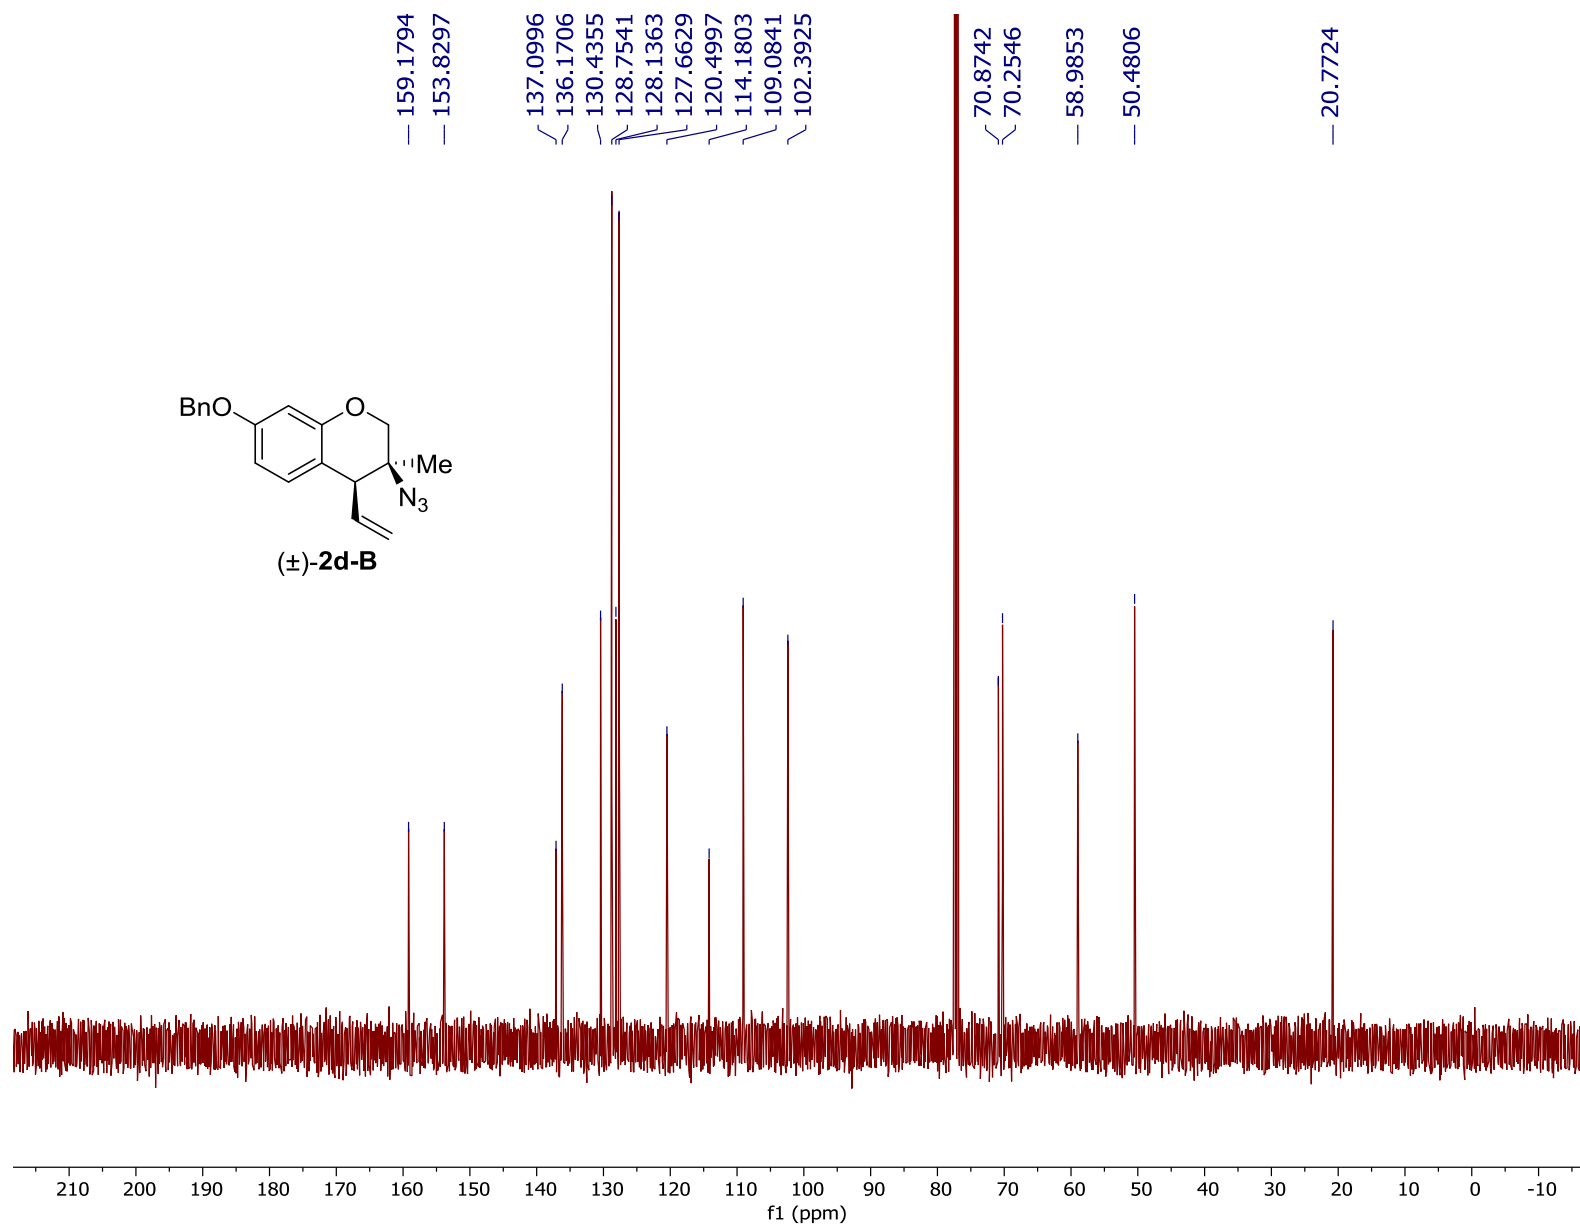

Compound 2d-B, 126 MHz  $^{13}\text{C}$  NMR Spectrum in  $\text{CDCl}_3$

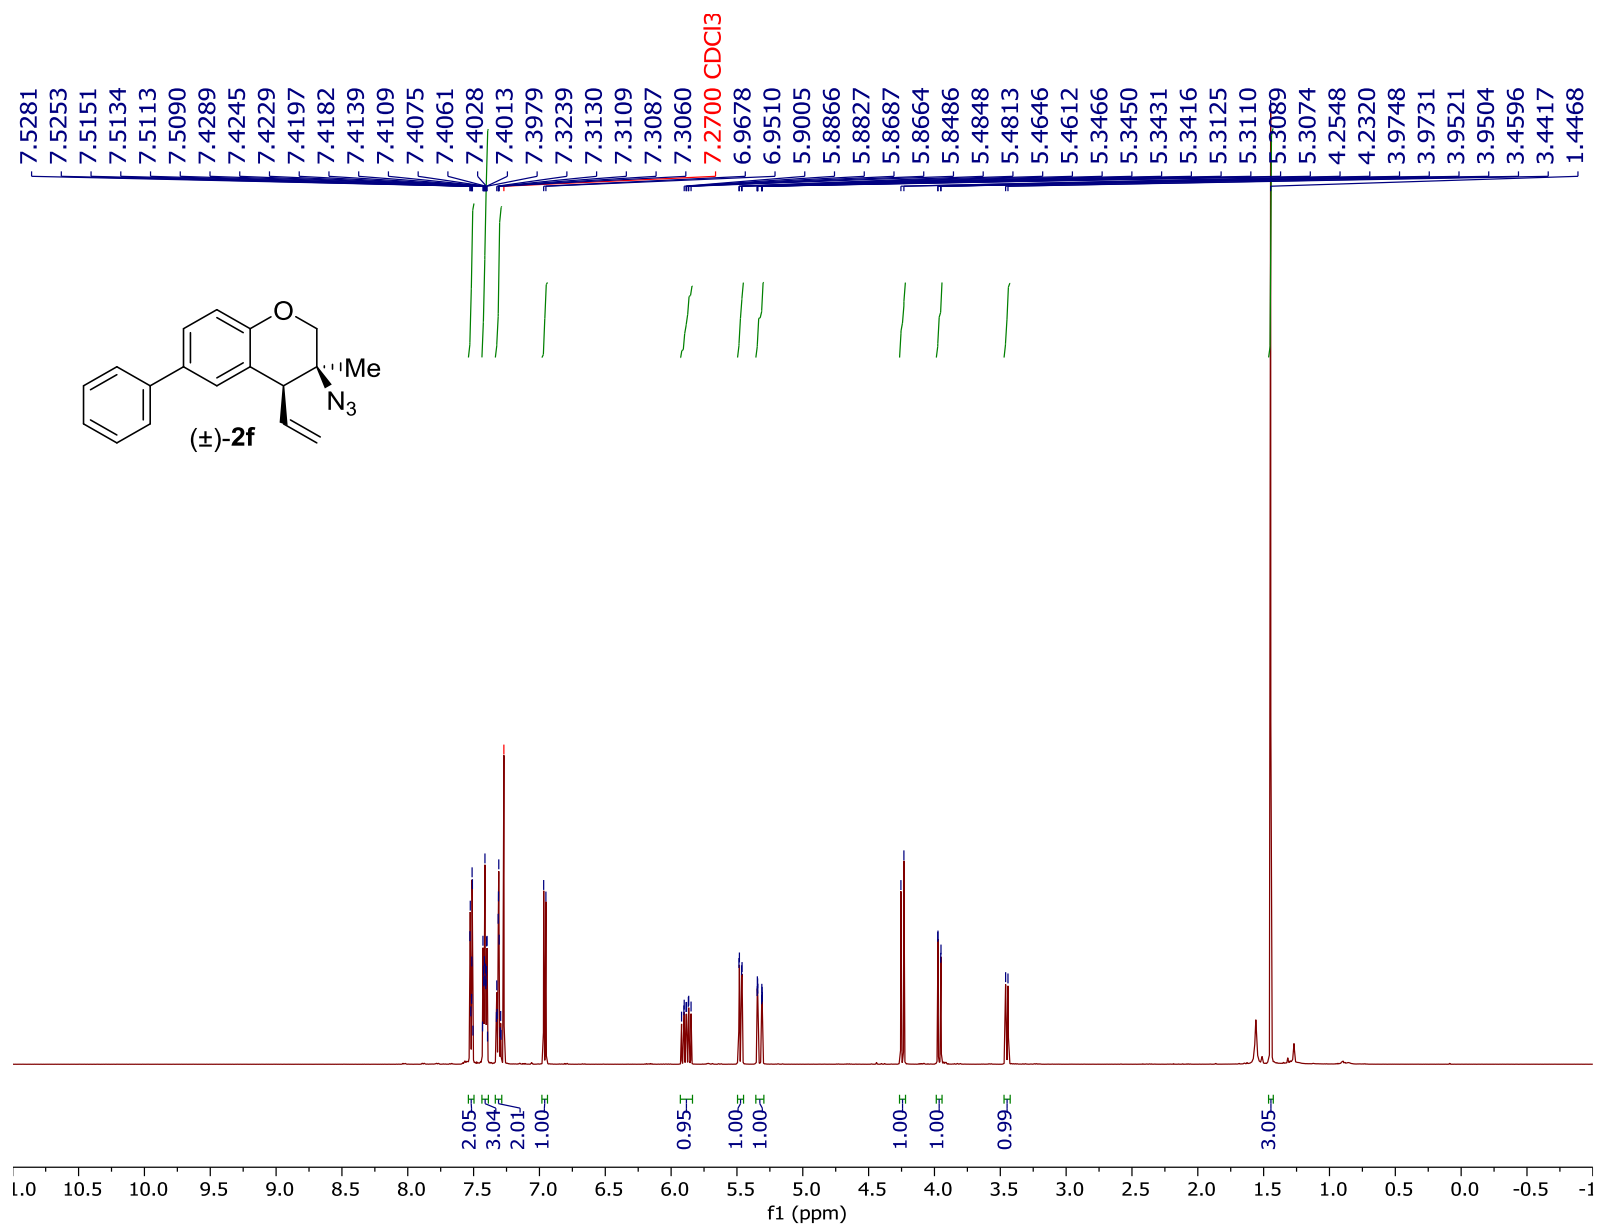

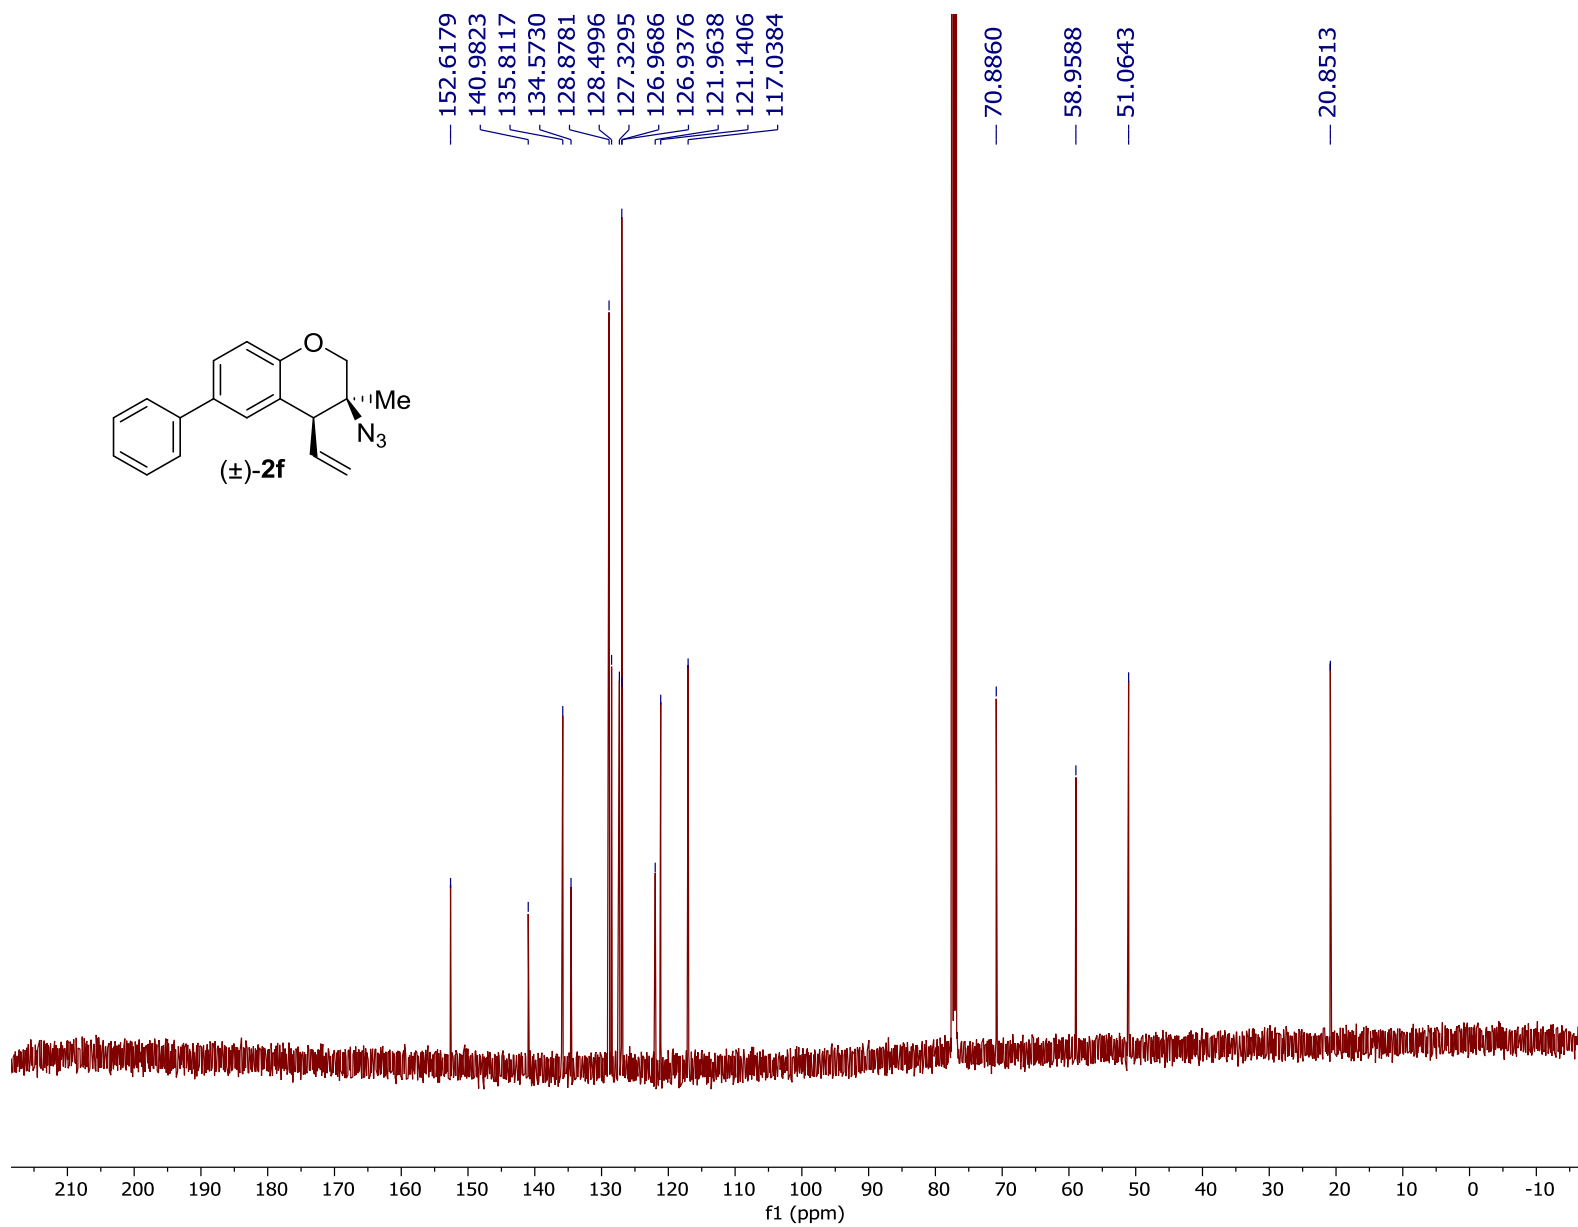

Compound 2f, 126 MHz  $^{13}\text{C}$  NMR Spectrum in  $\text{CDCl}_3$

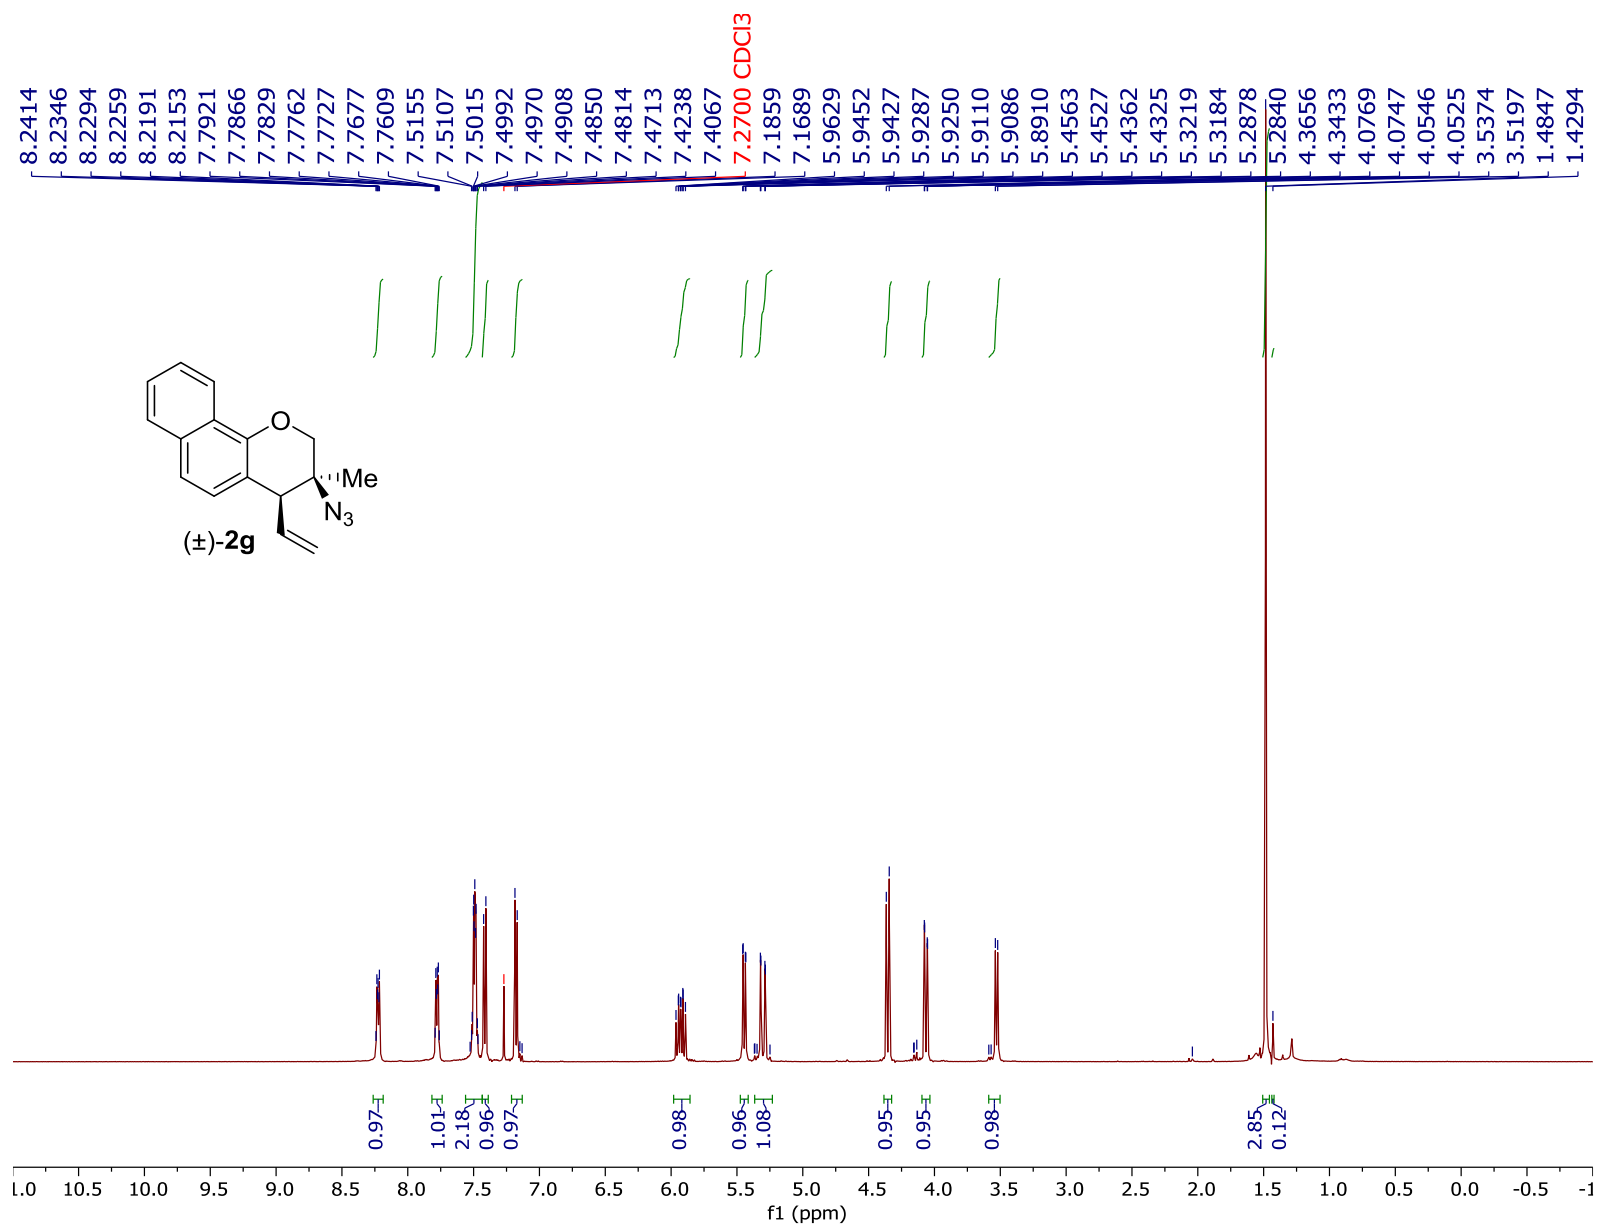

**Compound 2g, 500 MHz <sup>1</sup>H NMR Spectrum in CDCl<sub>3</sub>**



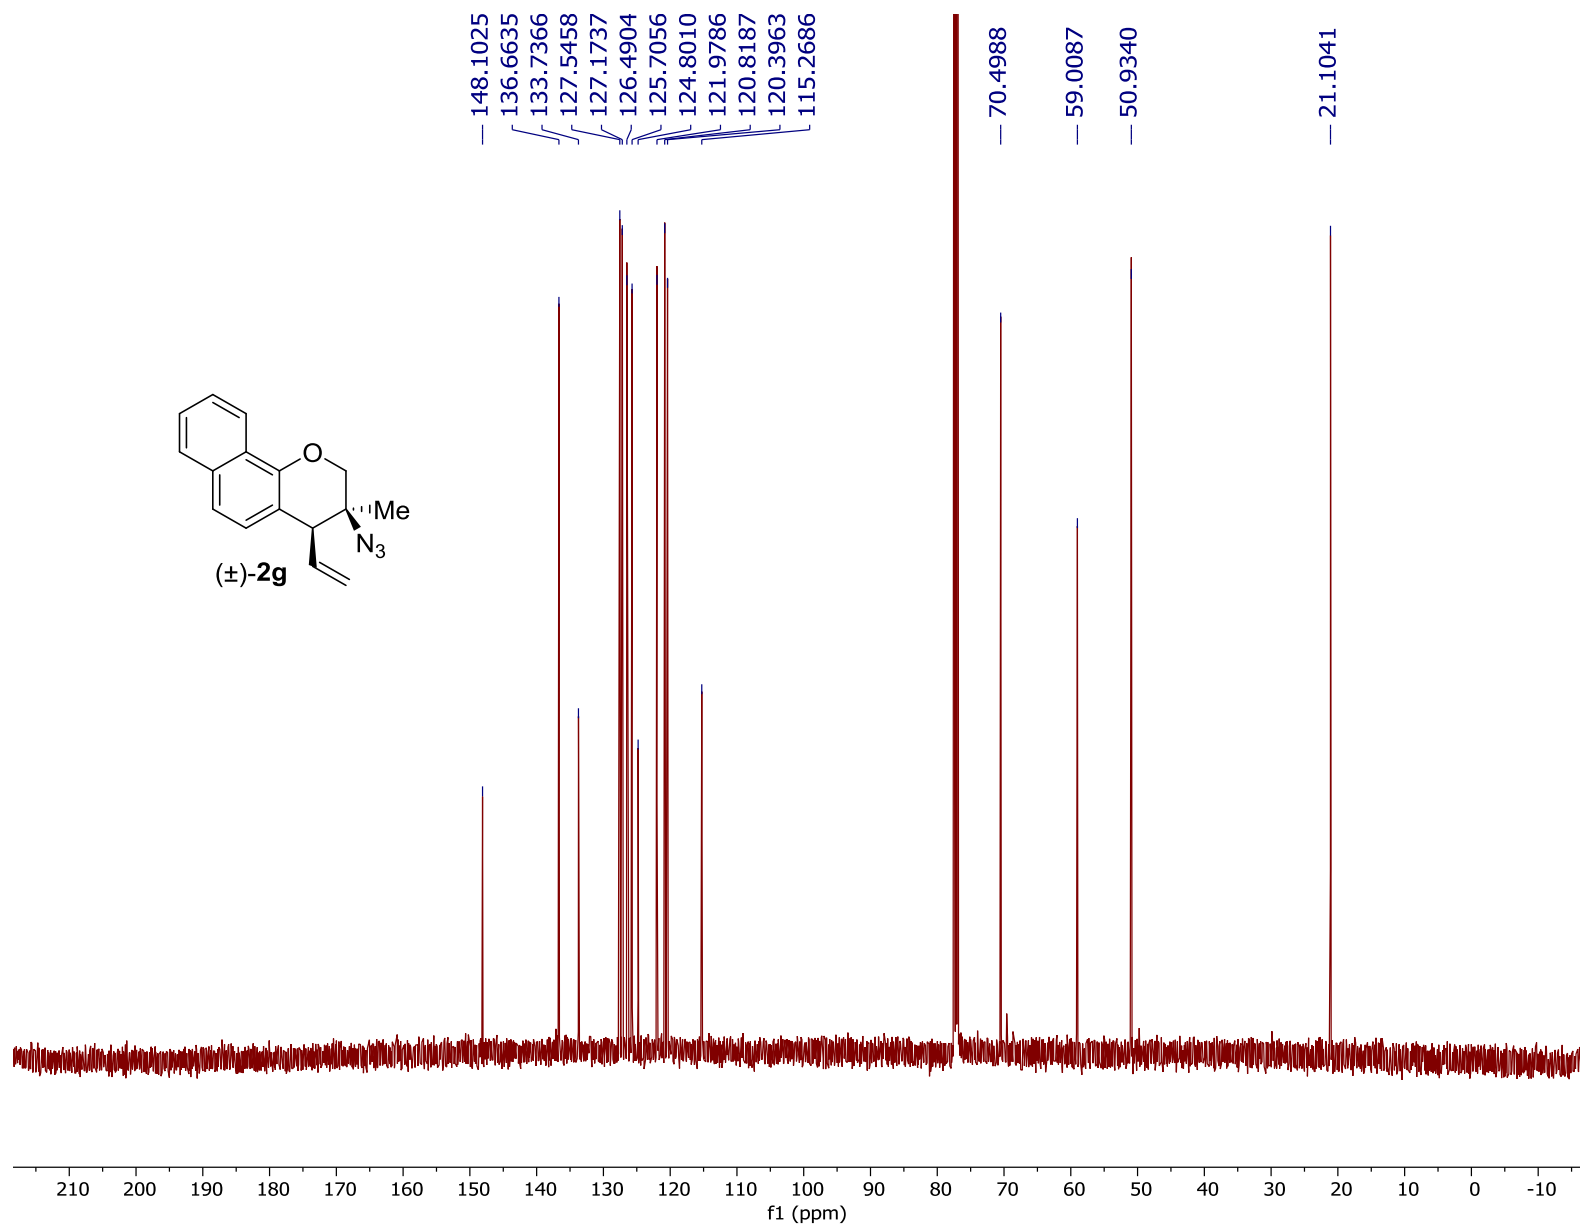

Compound 2g, 126 MHz  $^{13}\text{C}$  NMR Spectrum in  $\text{CDCl}_3$

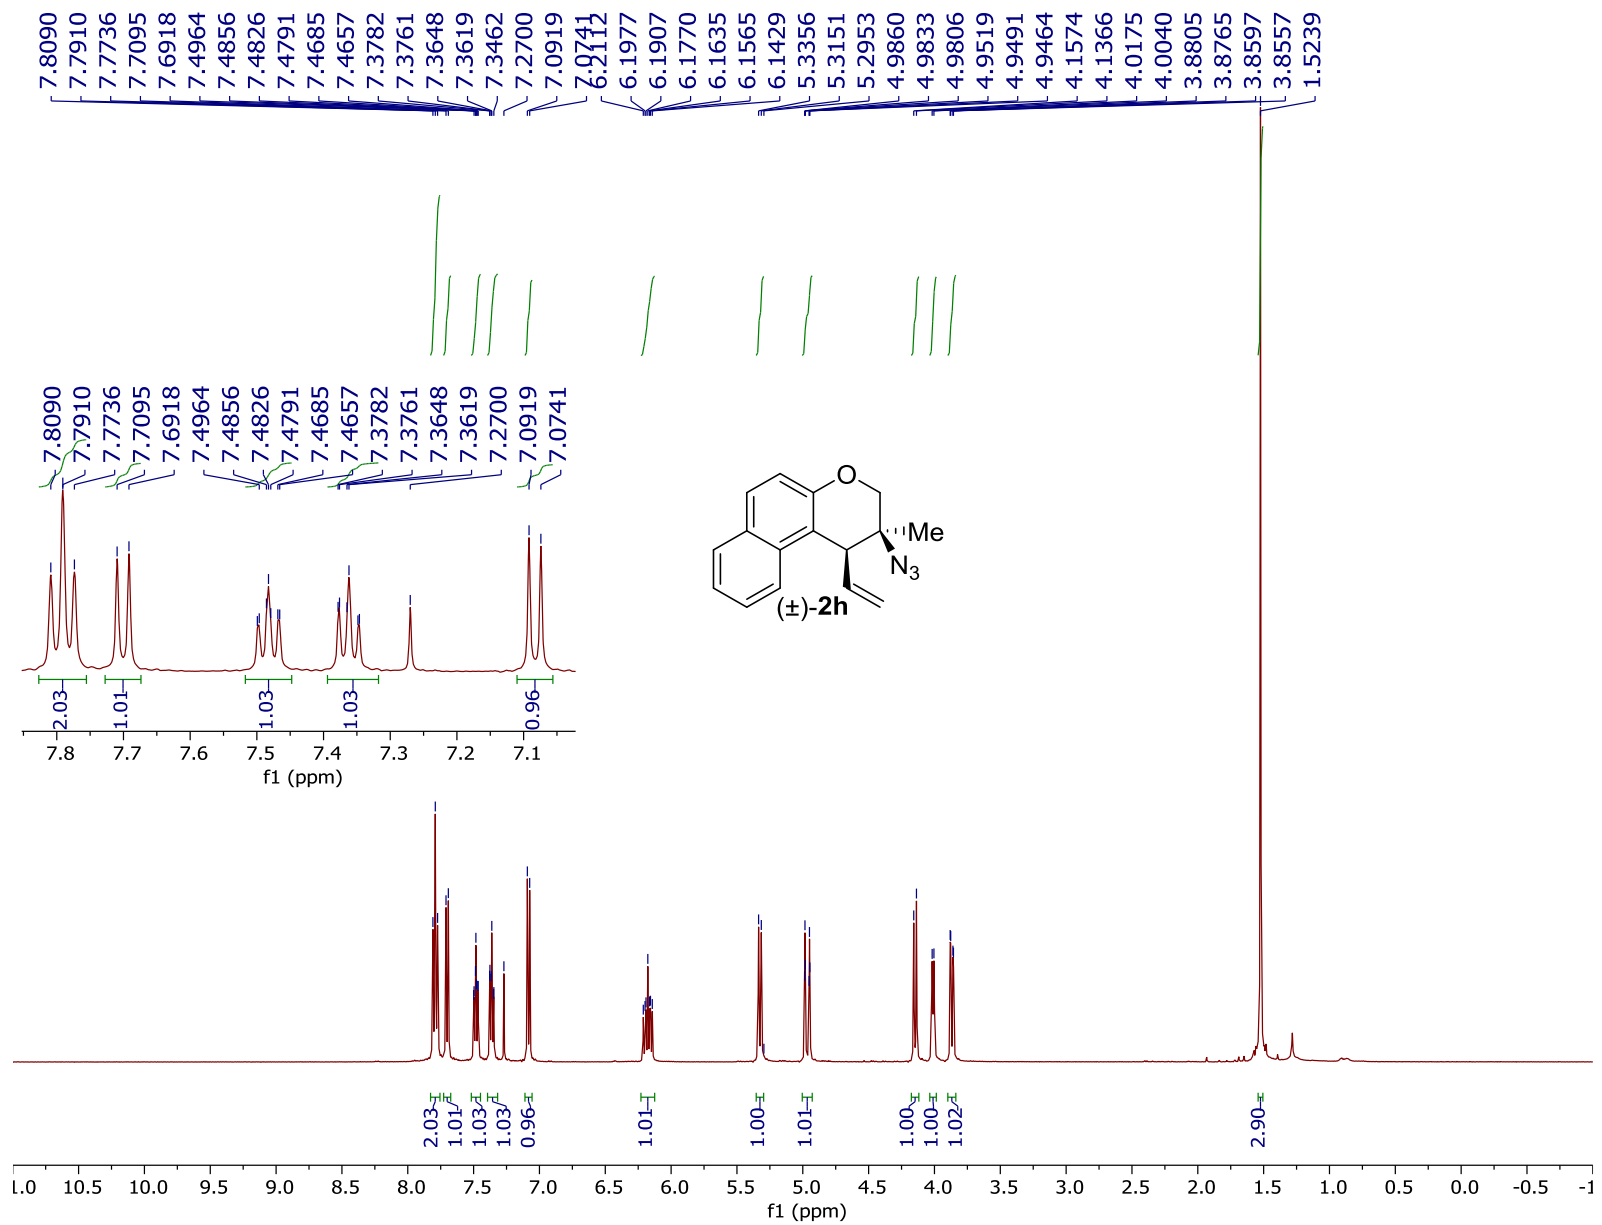

**Compound 2h, 500 MHz <sup>1</sup>H NMR Spectrum in CDCl<sub>3</sub>**

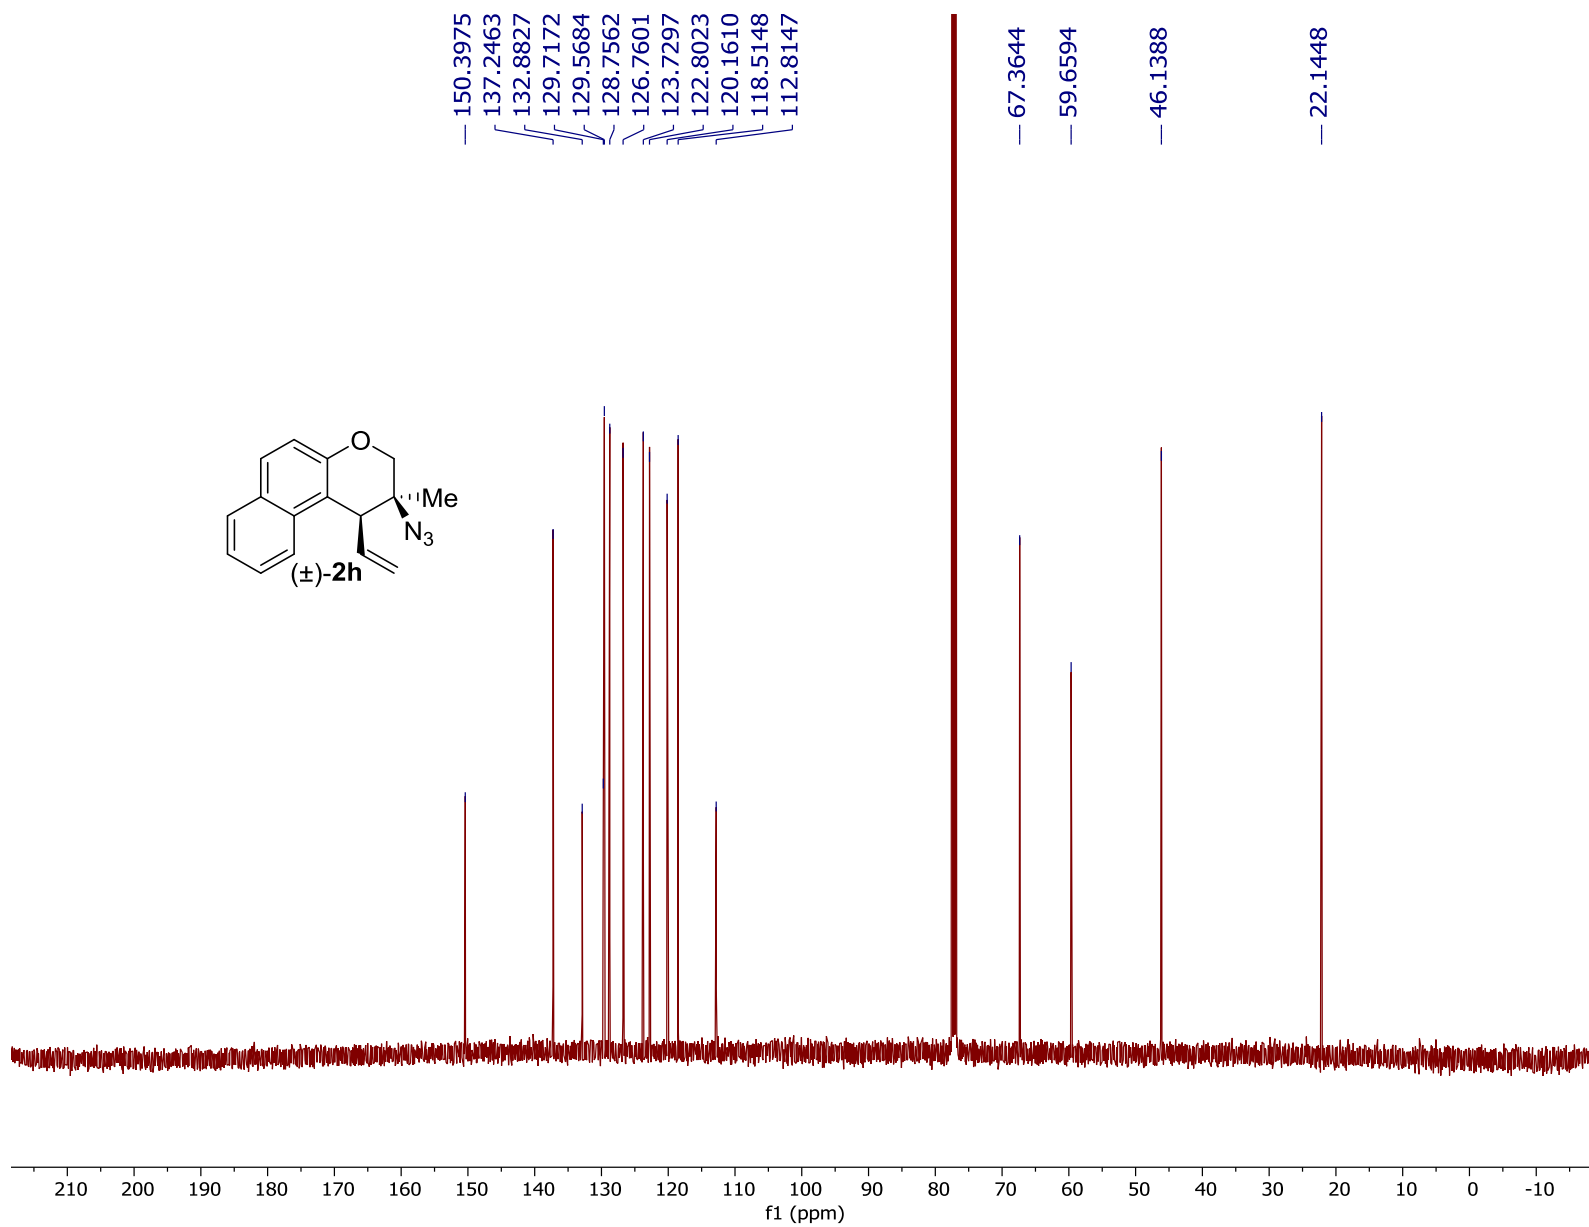

Compound 2h, 126 MHz  $^{13}\text{C}$  NMR Spectrum in  $\text{CDCl}_3$

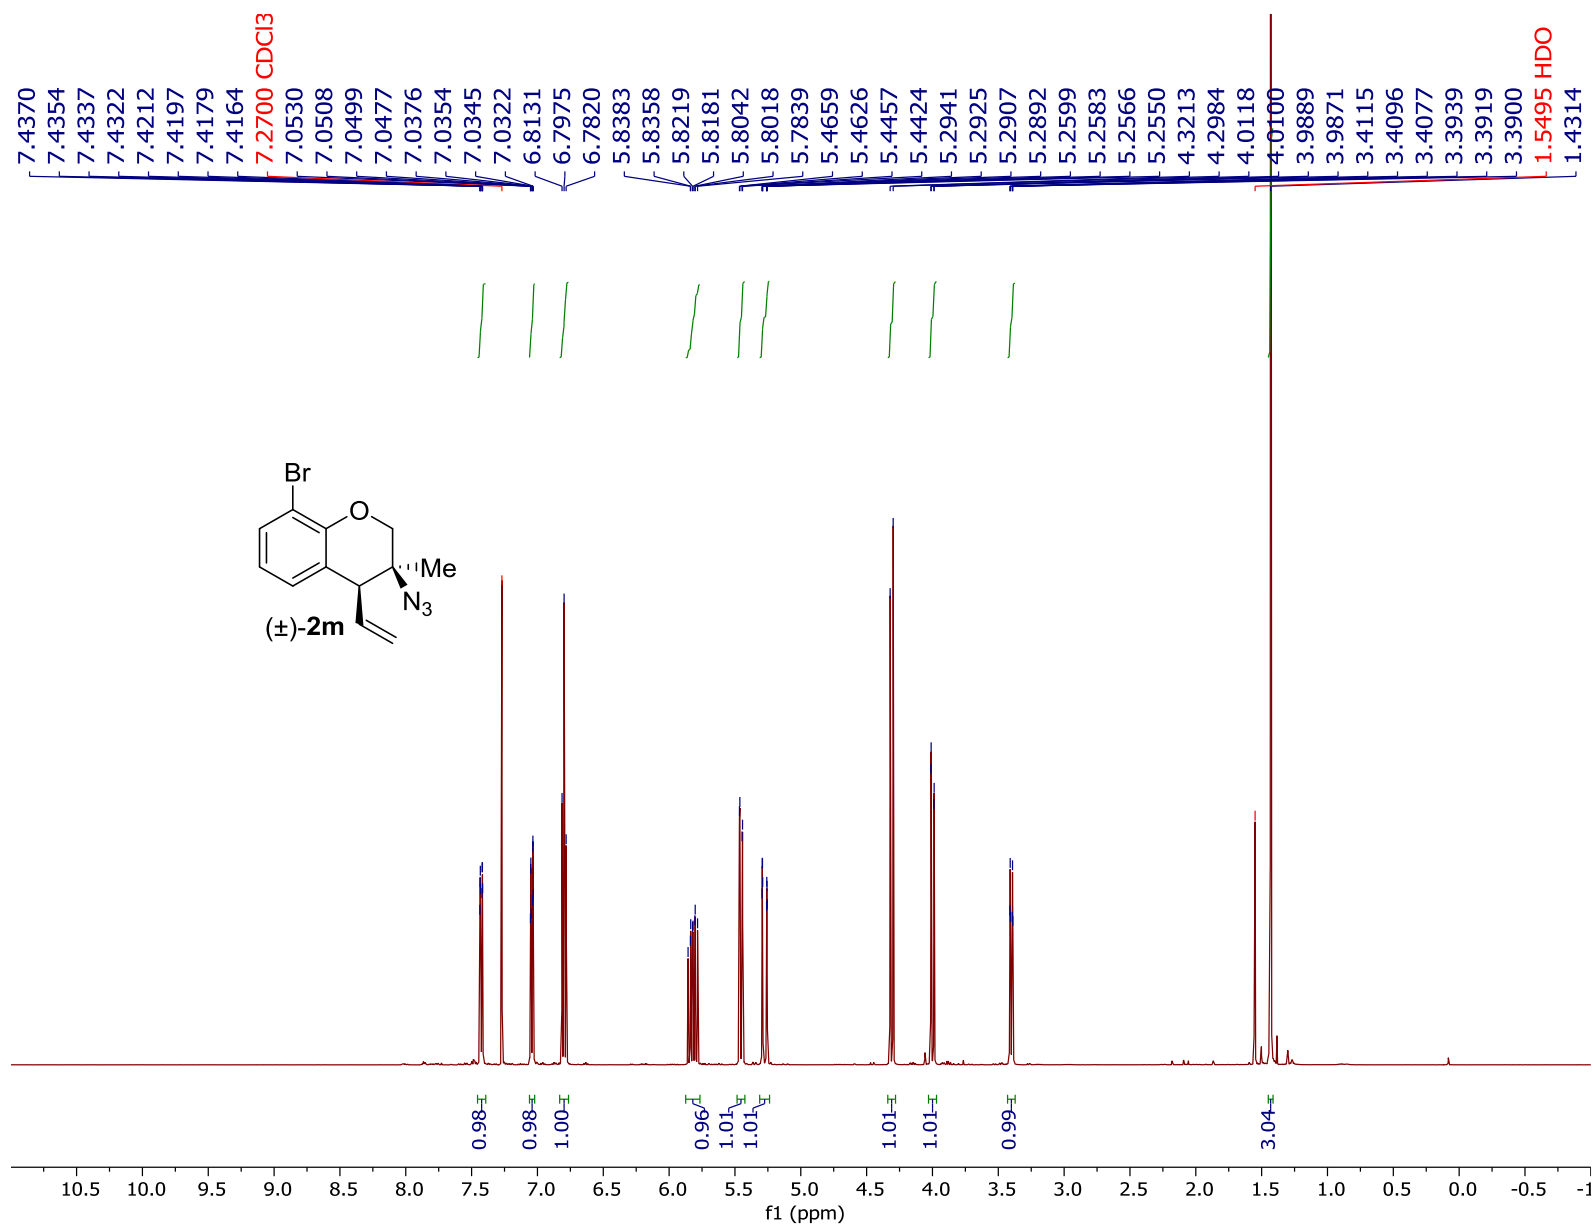

Compound 2m, 500 MHz <sup>1</sup>H NMR Spectrum in CDCl<sub>3</sub>

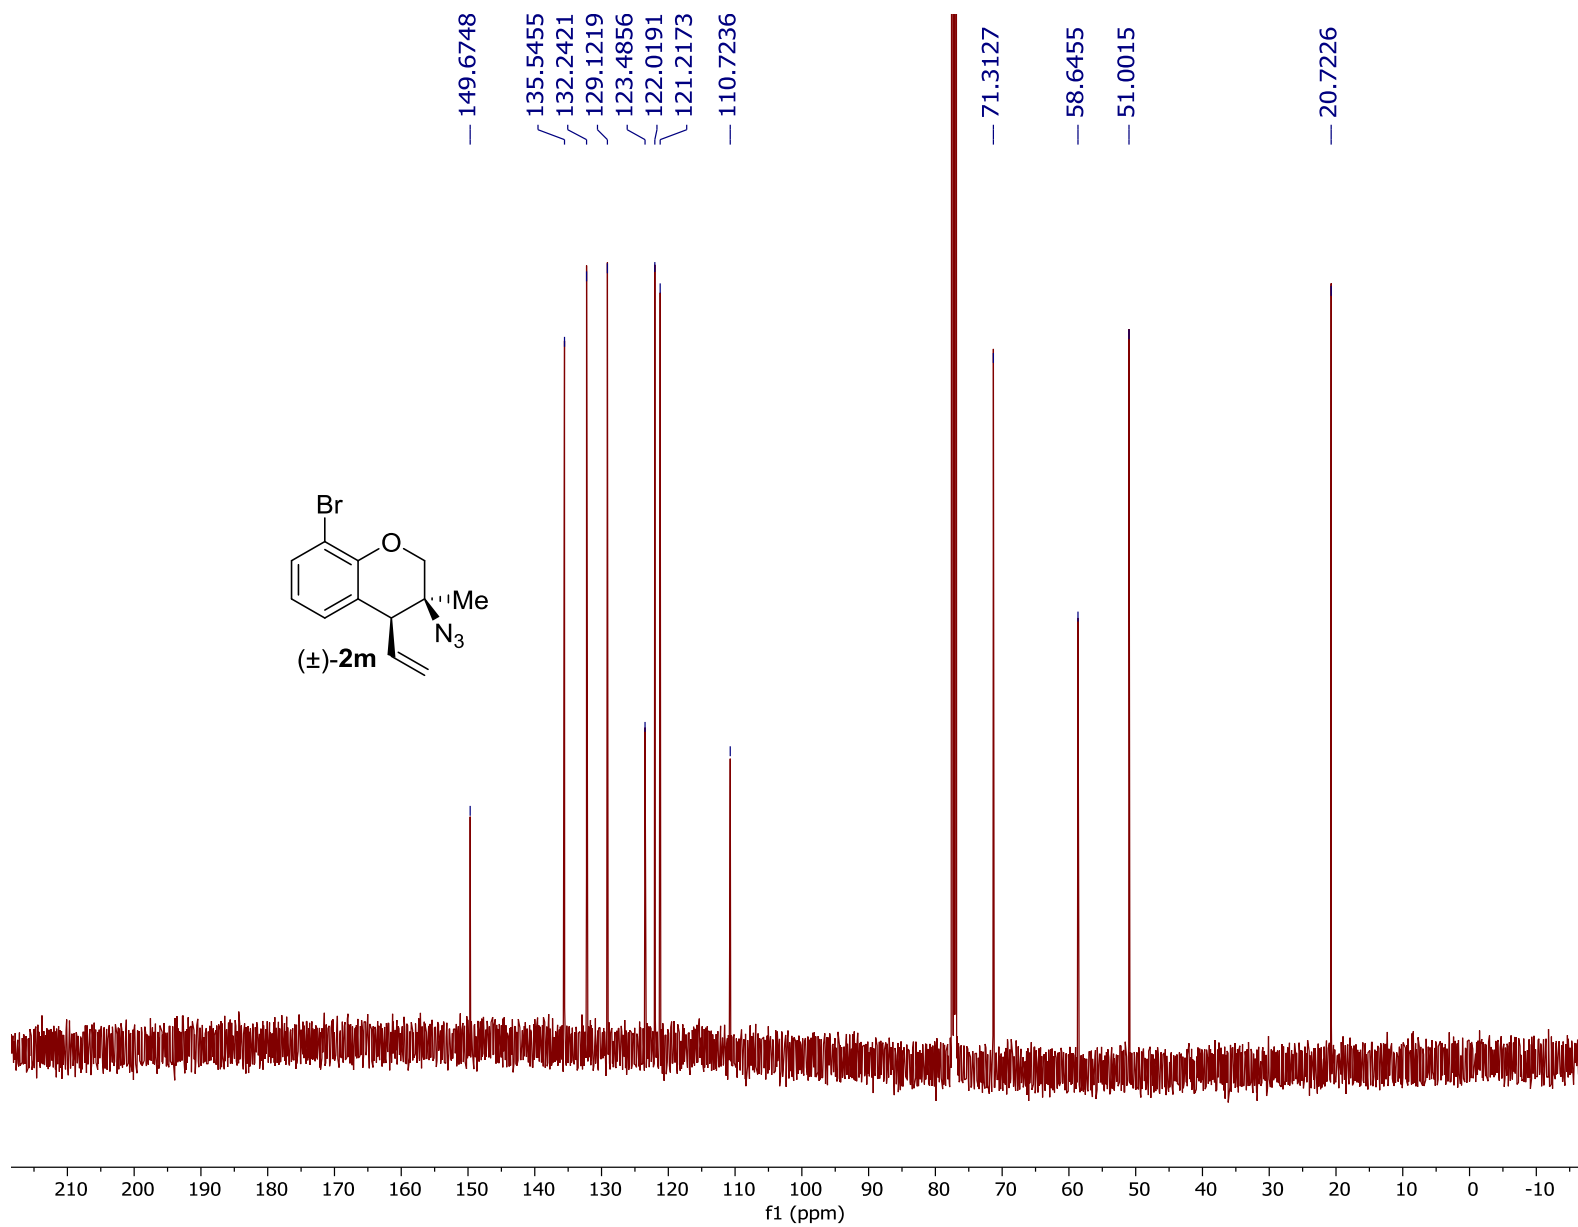

Compound 2m, 126 MHz  $^{13}\text{C}$  NMR Spectrum in  $\text{CDCl}_3$

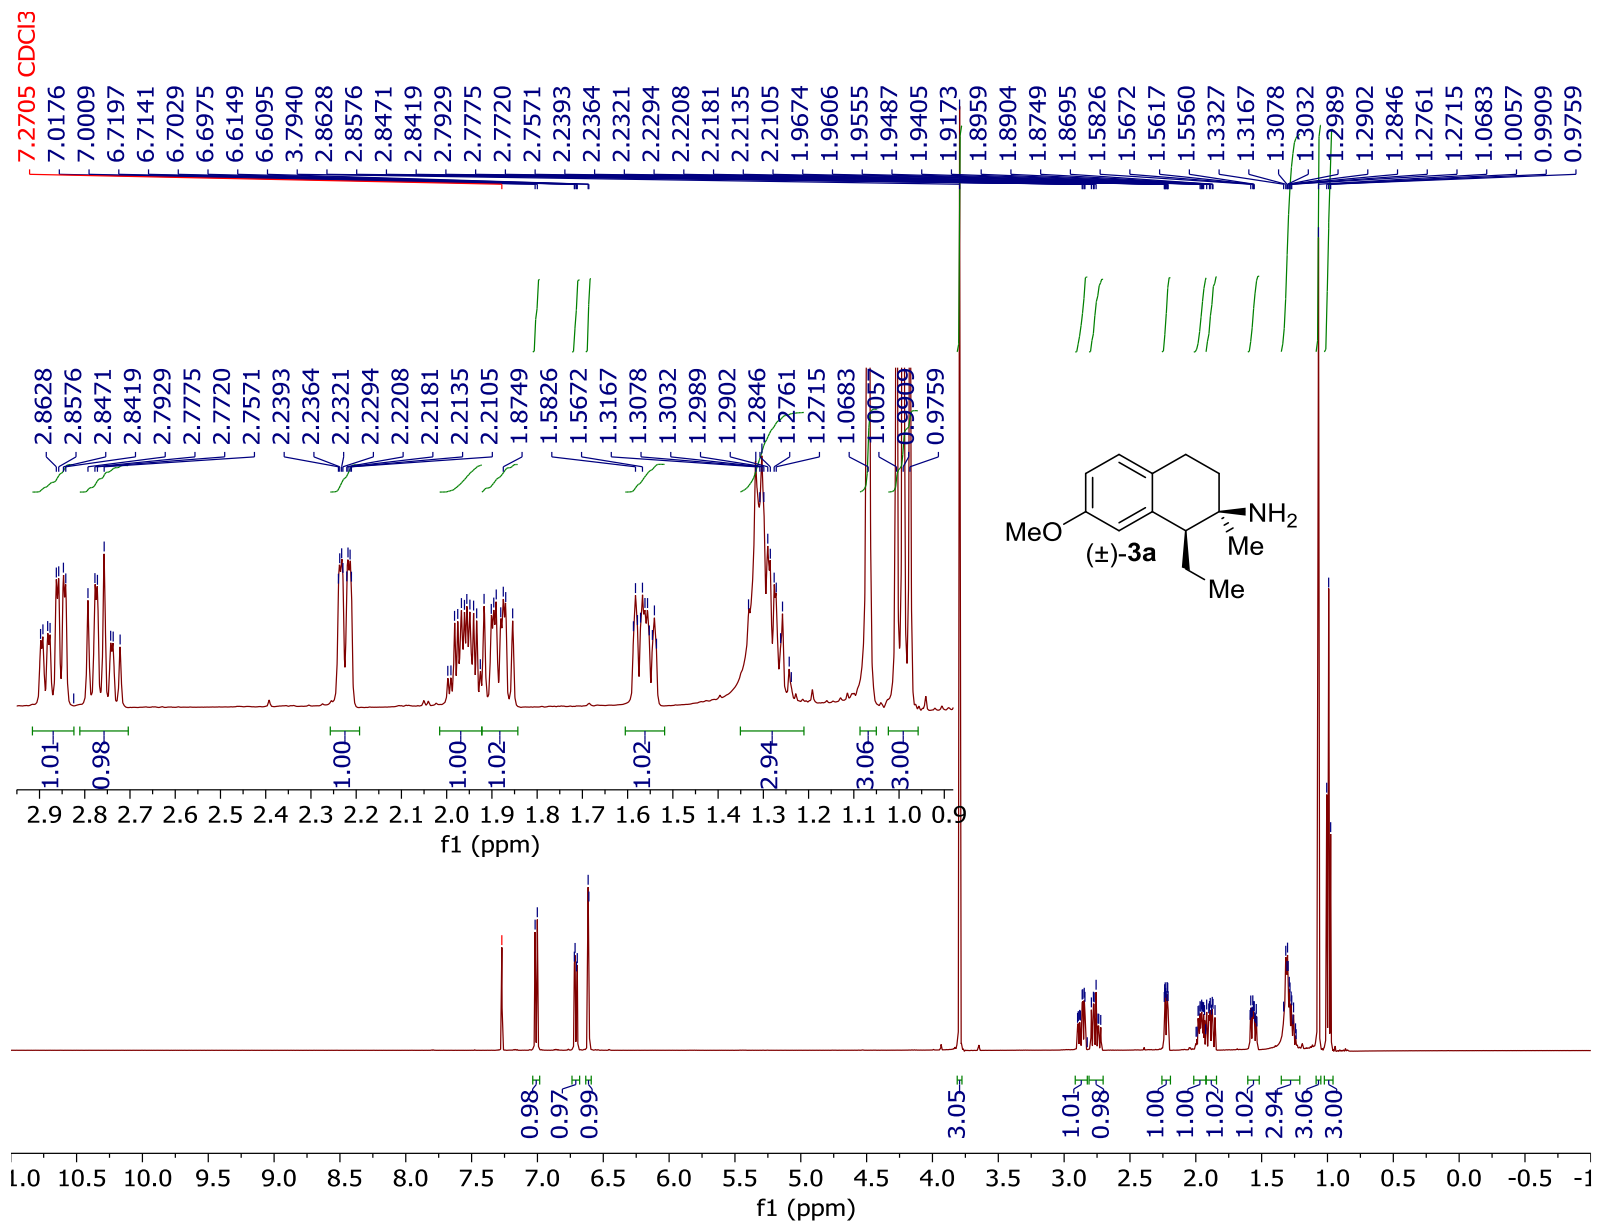

**Compound 3a, 500 MHz <sup>1</sup>H NMR Spectrum in CDCl<sub>3</sub>**

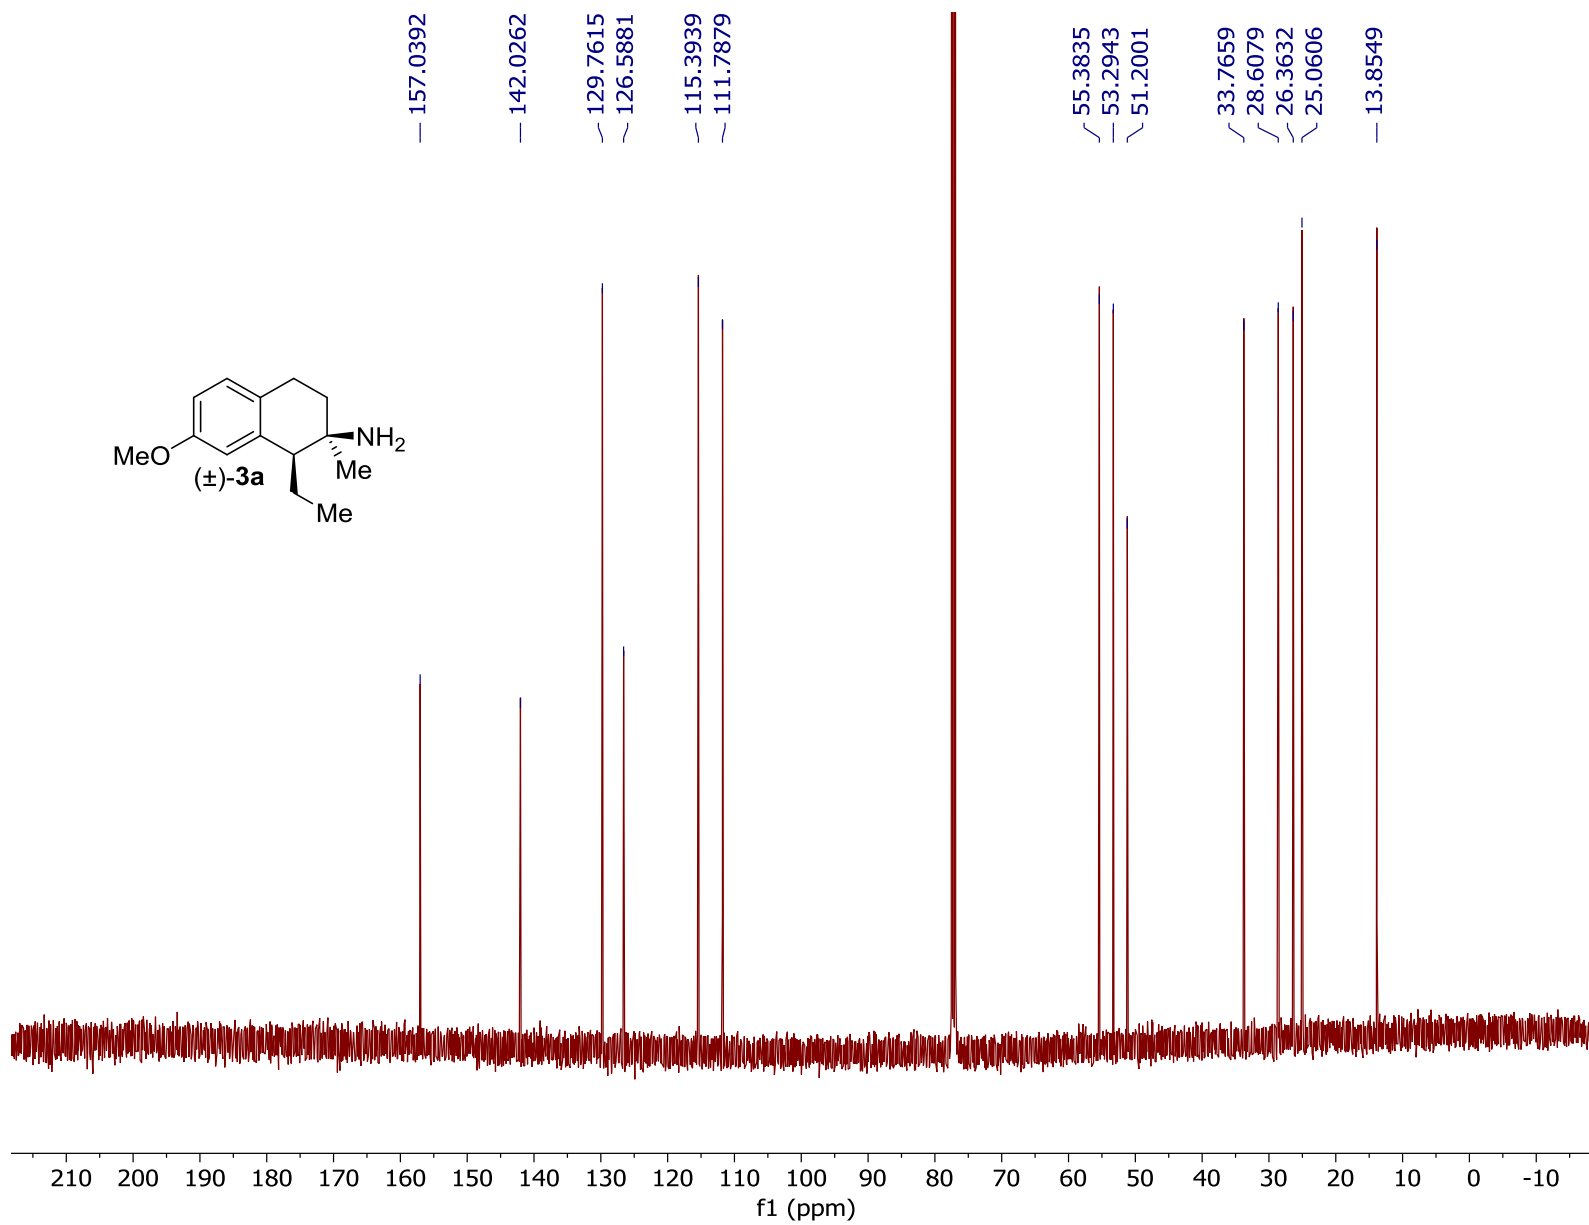

Compound 3a, 126 MHz <sup>13</sup>C NMR Spectrum in CDCl<sub>3</sub>

7.2704 CDCl<sub>3</sub>

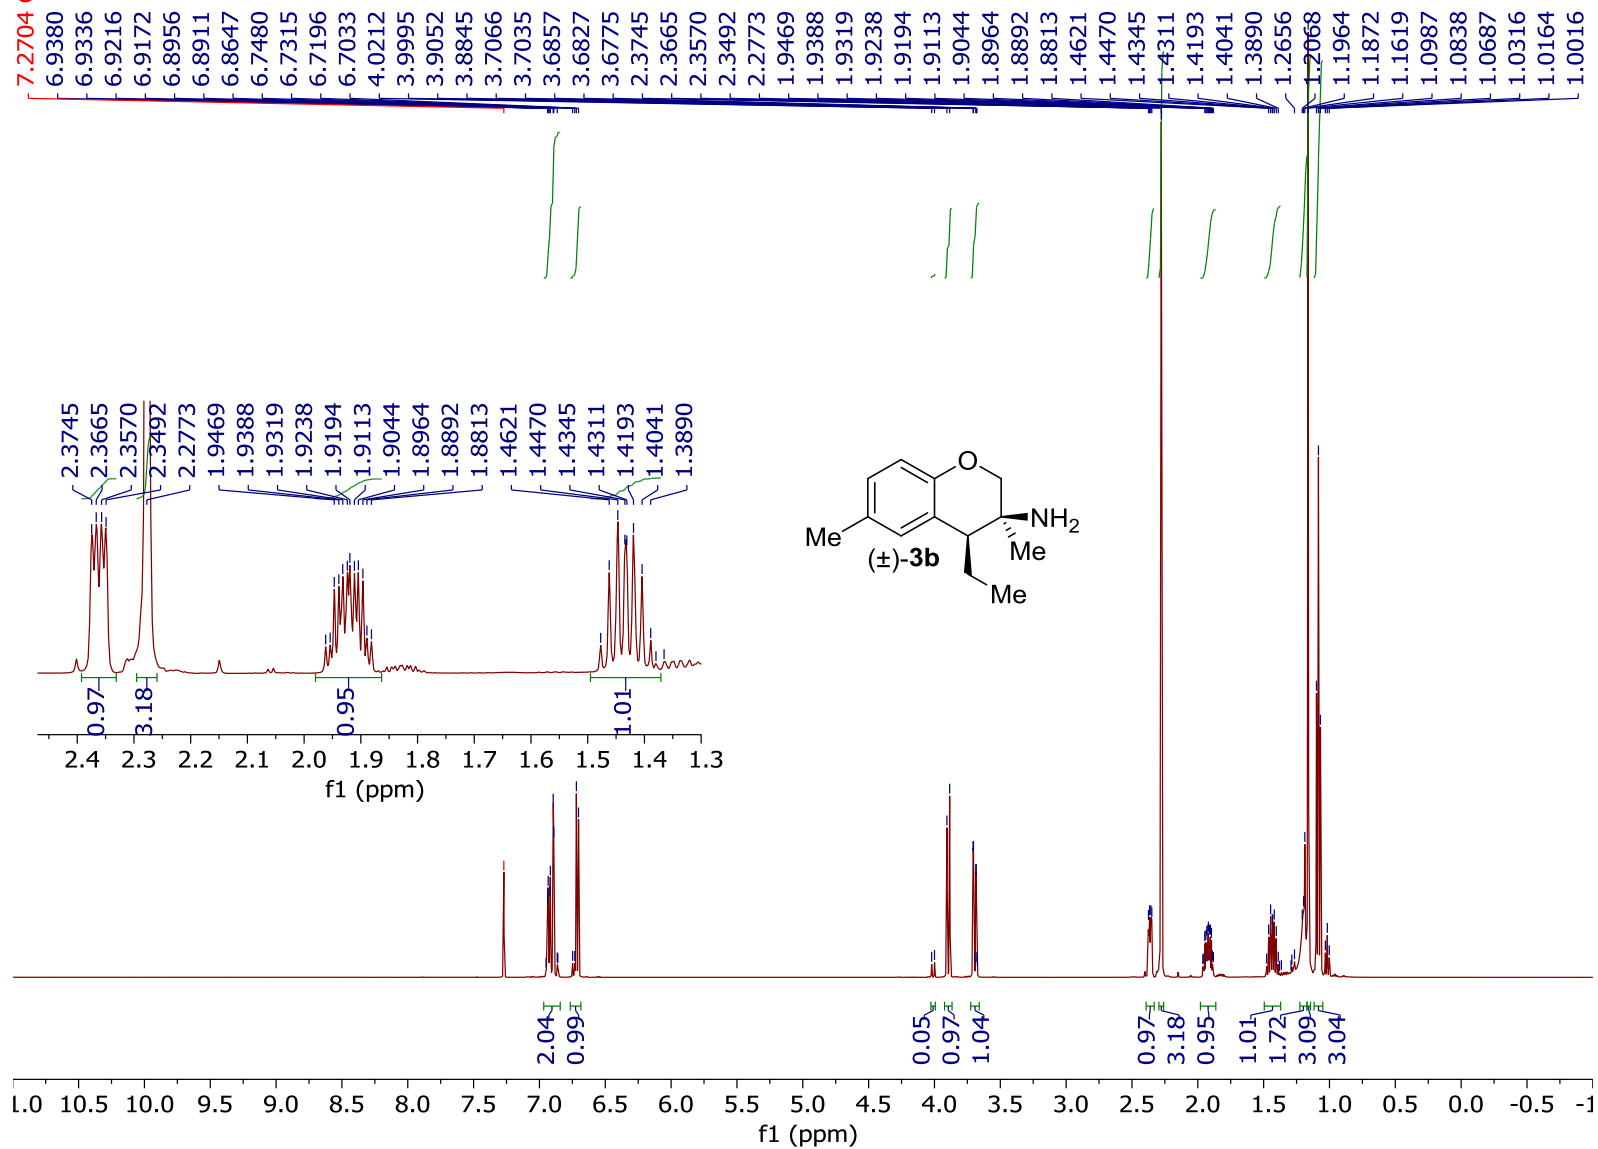

Compound **3b**, 500 MHz <sup>1</sup>H NMR Spectrum in CDCl<sub>3</sub>



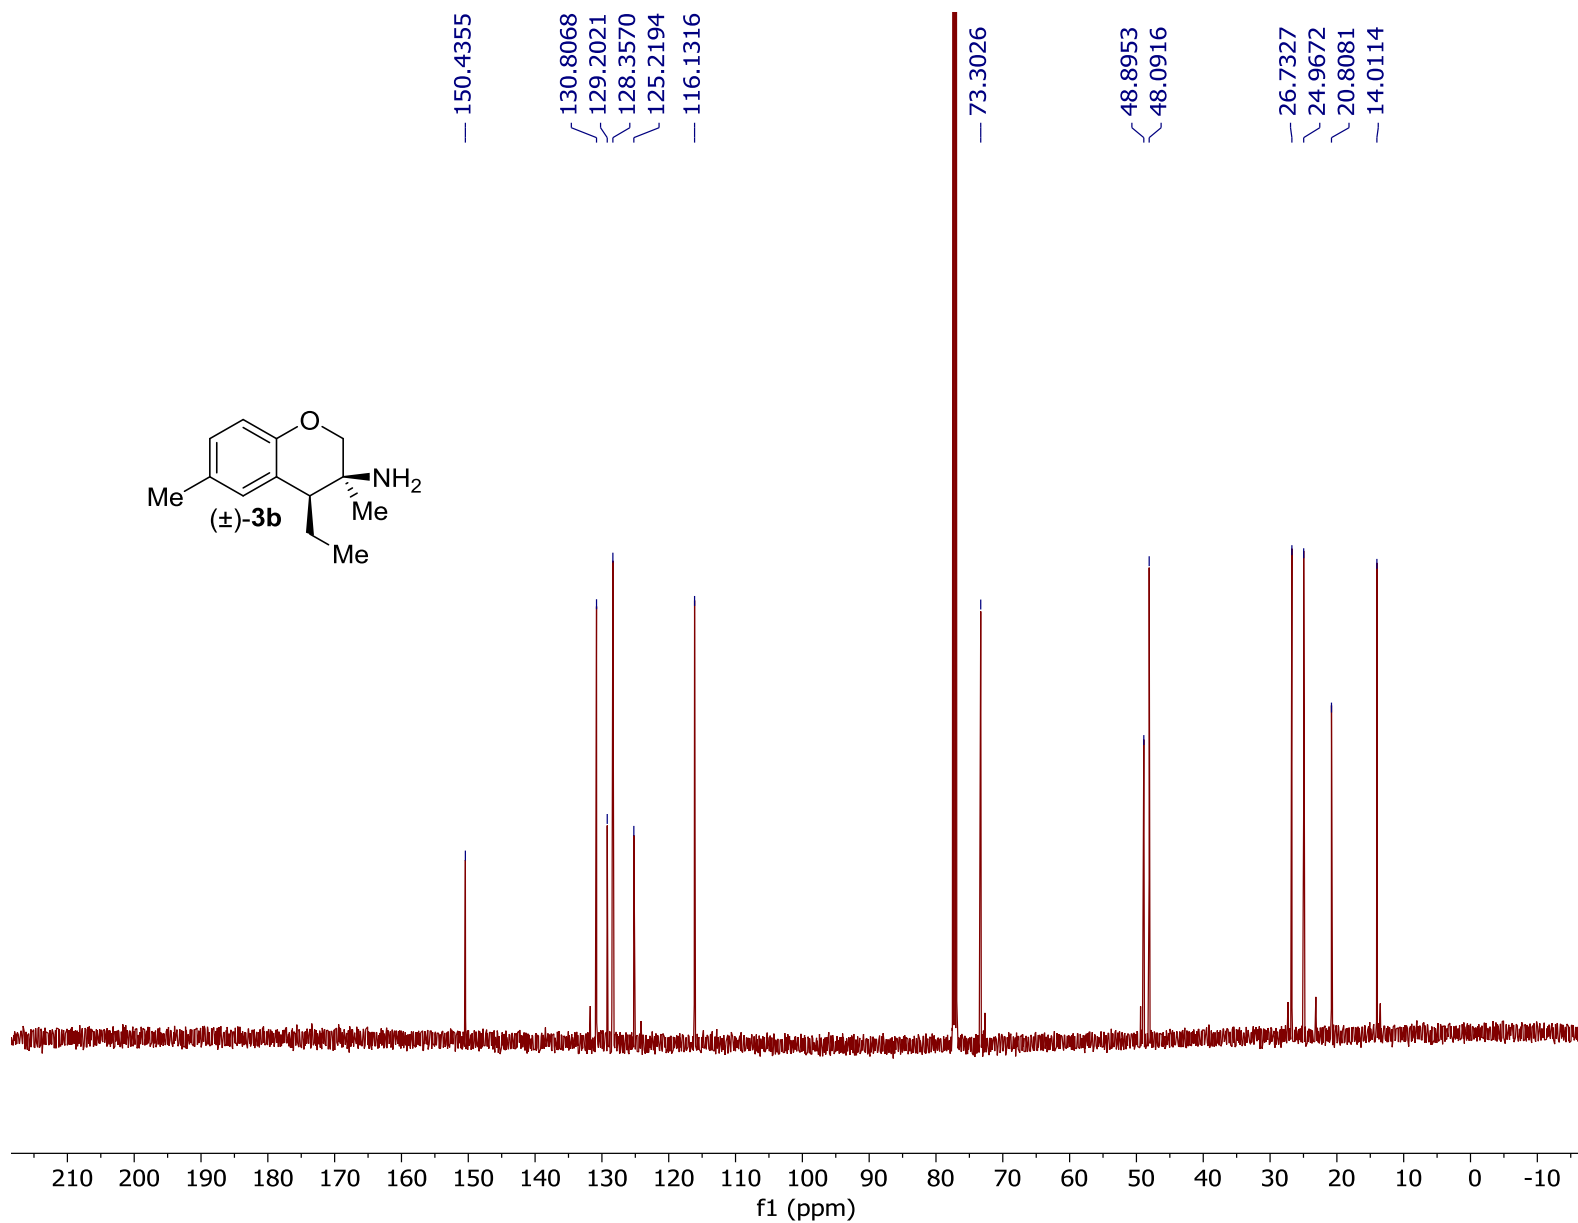

Compound 3b, 126 MHz  $^{13}\text{C}$  NMR Spectrum in  $\text{CDCl}_3$

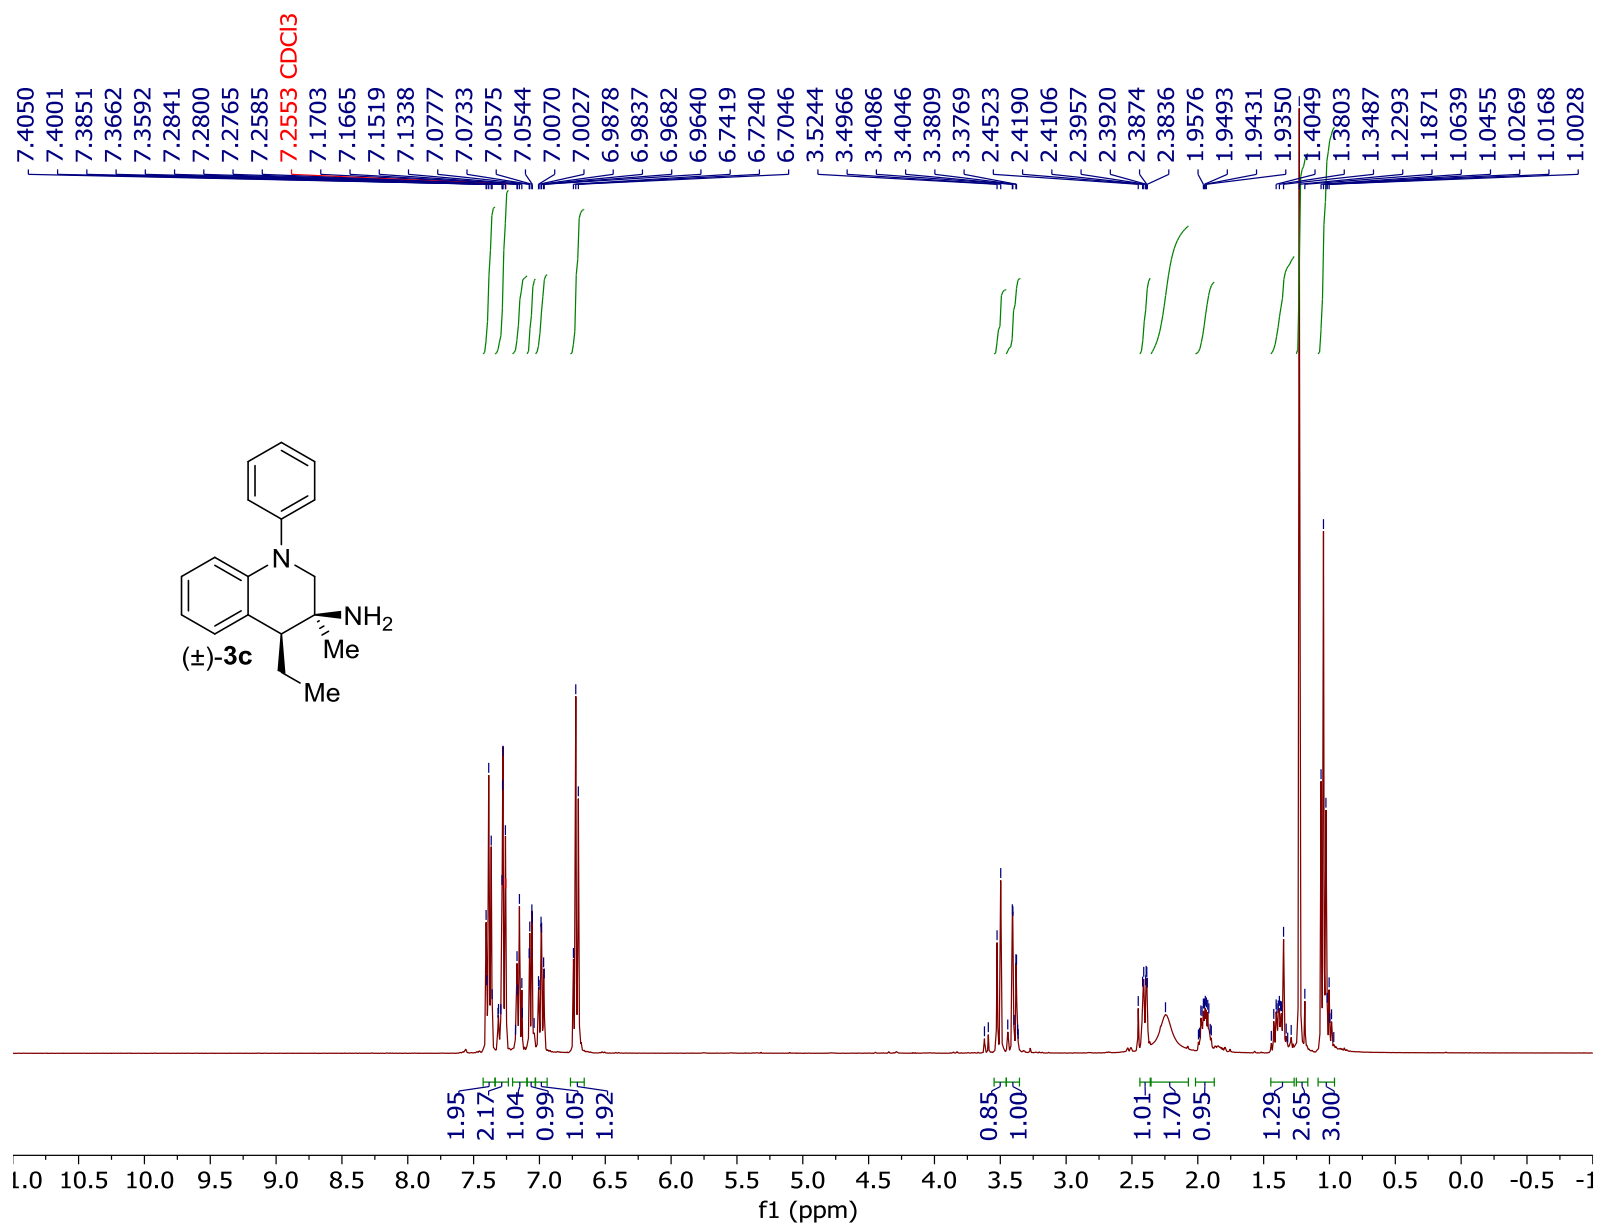

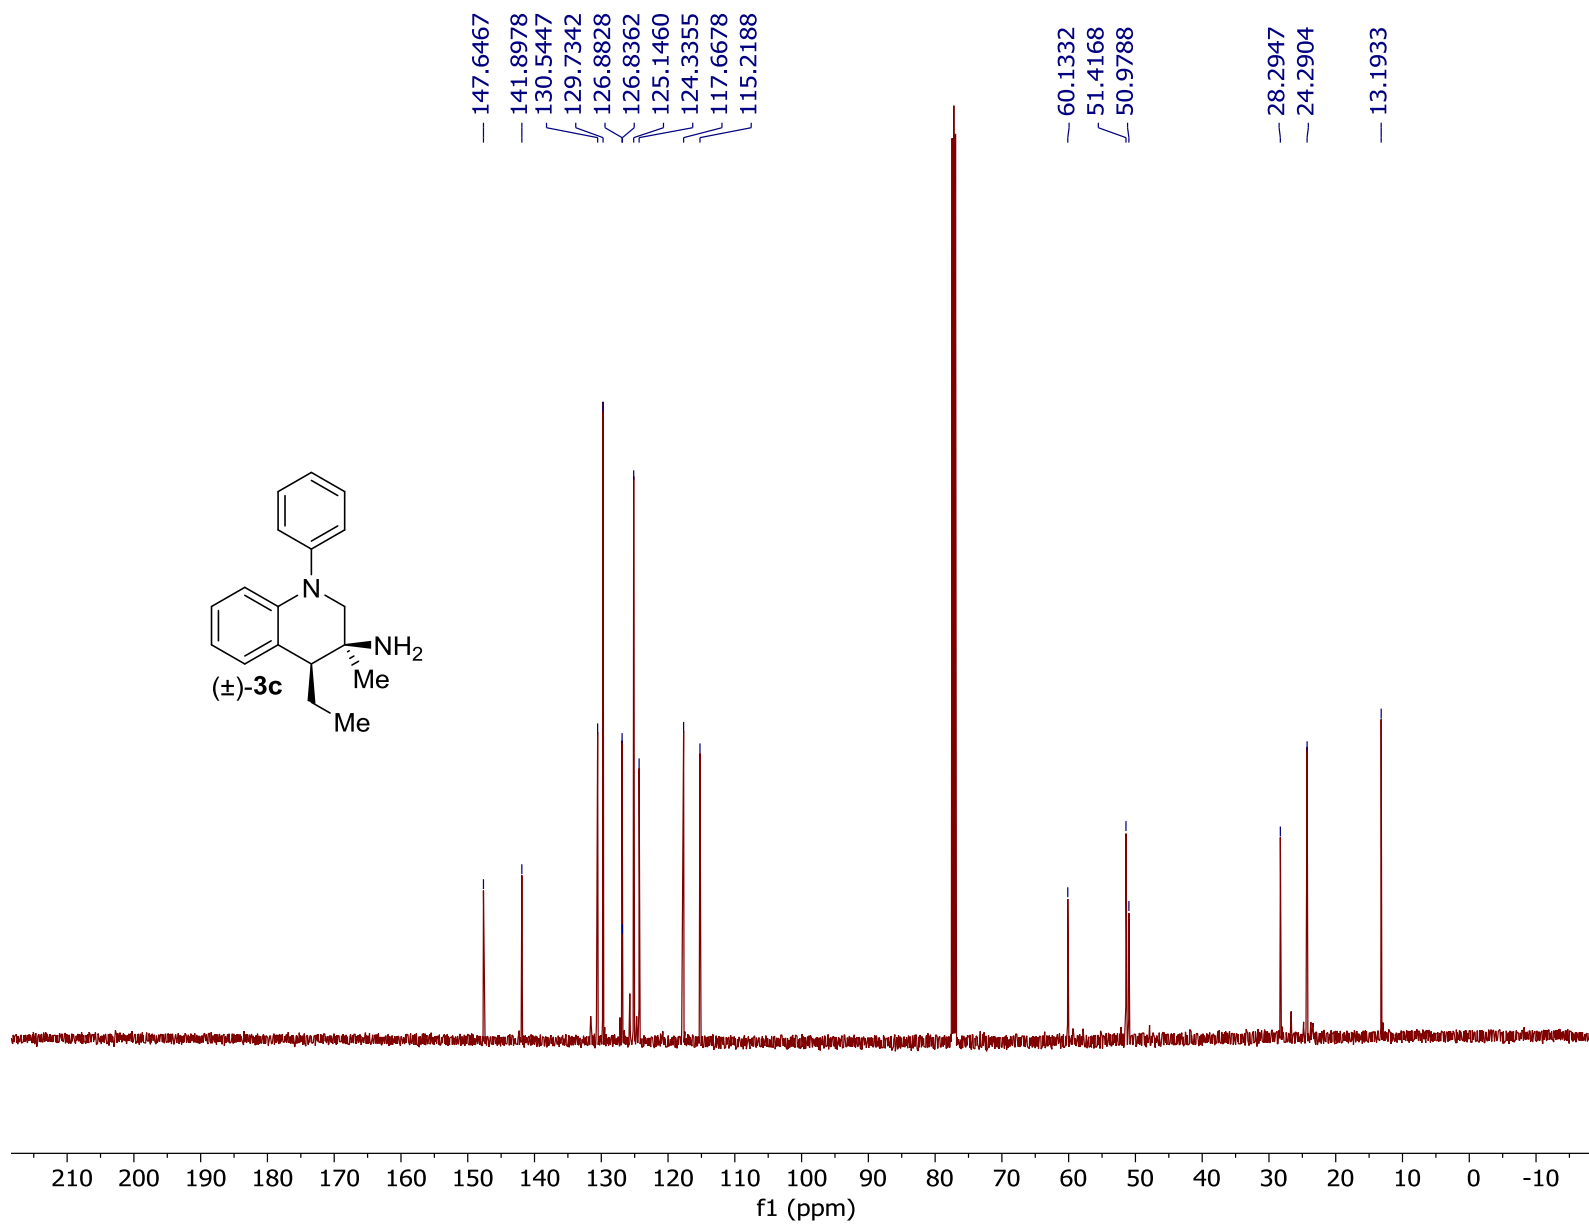

Compound 3c, 126 MHz <sup>13</sup>C NMR Spectrum in CDCl<sub>3</sub>

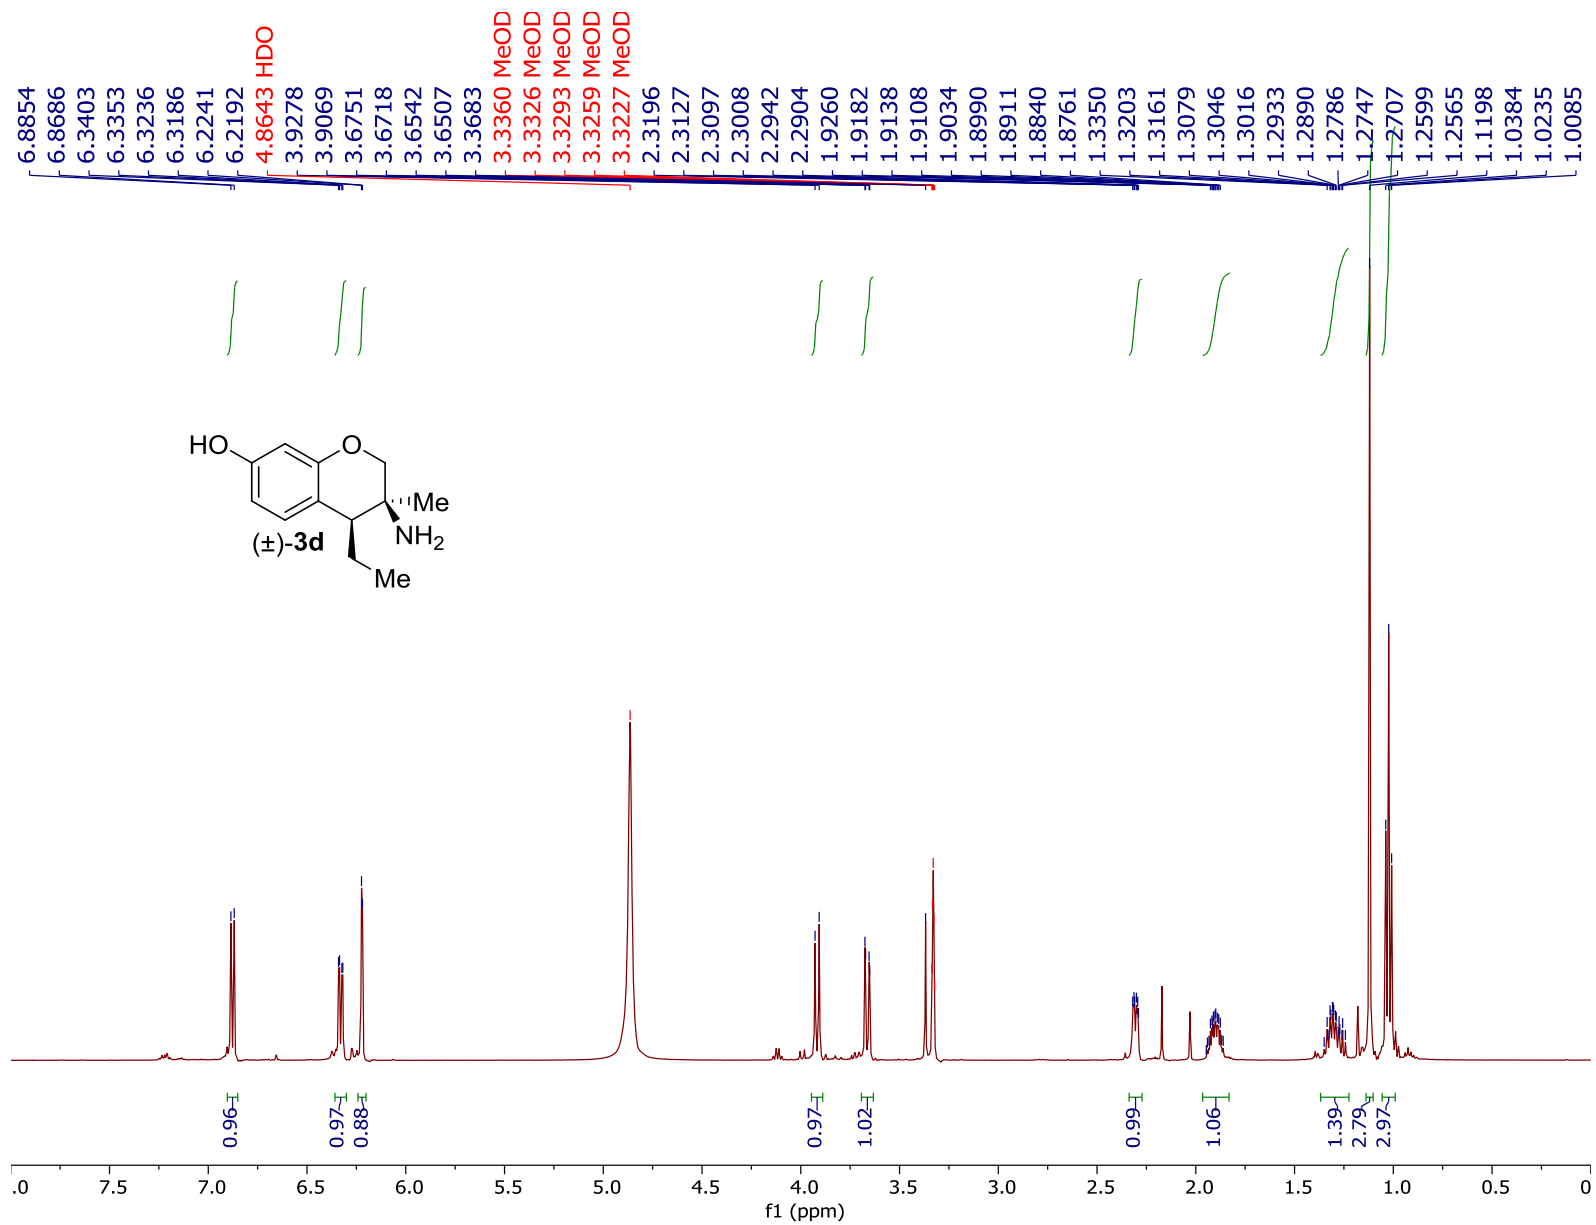

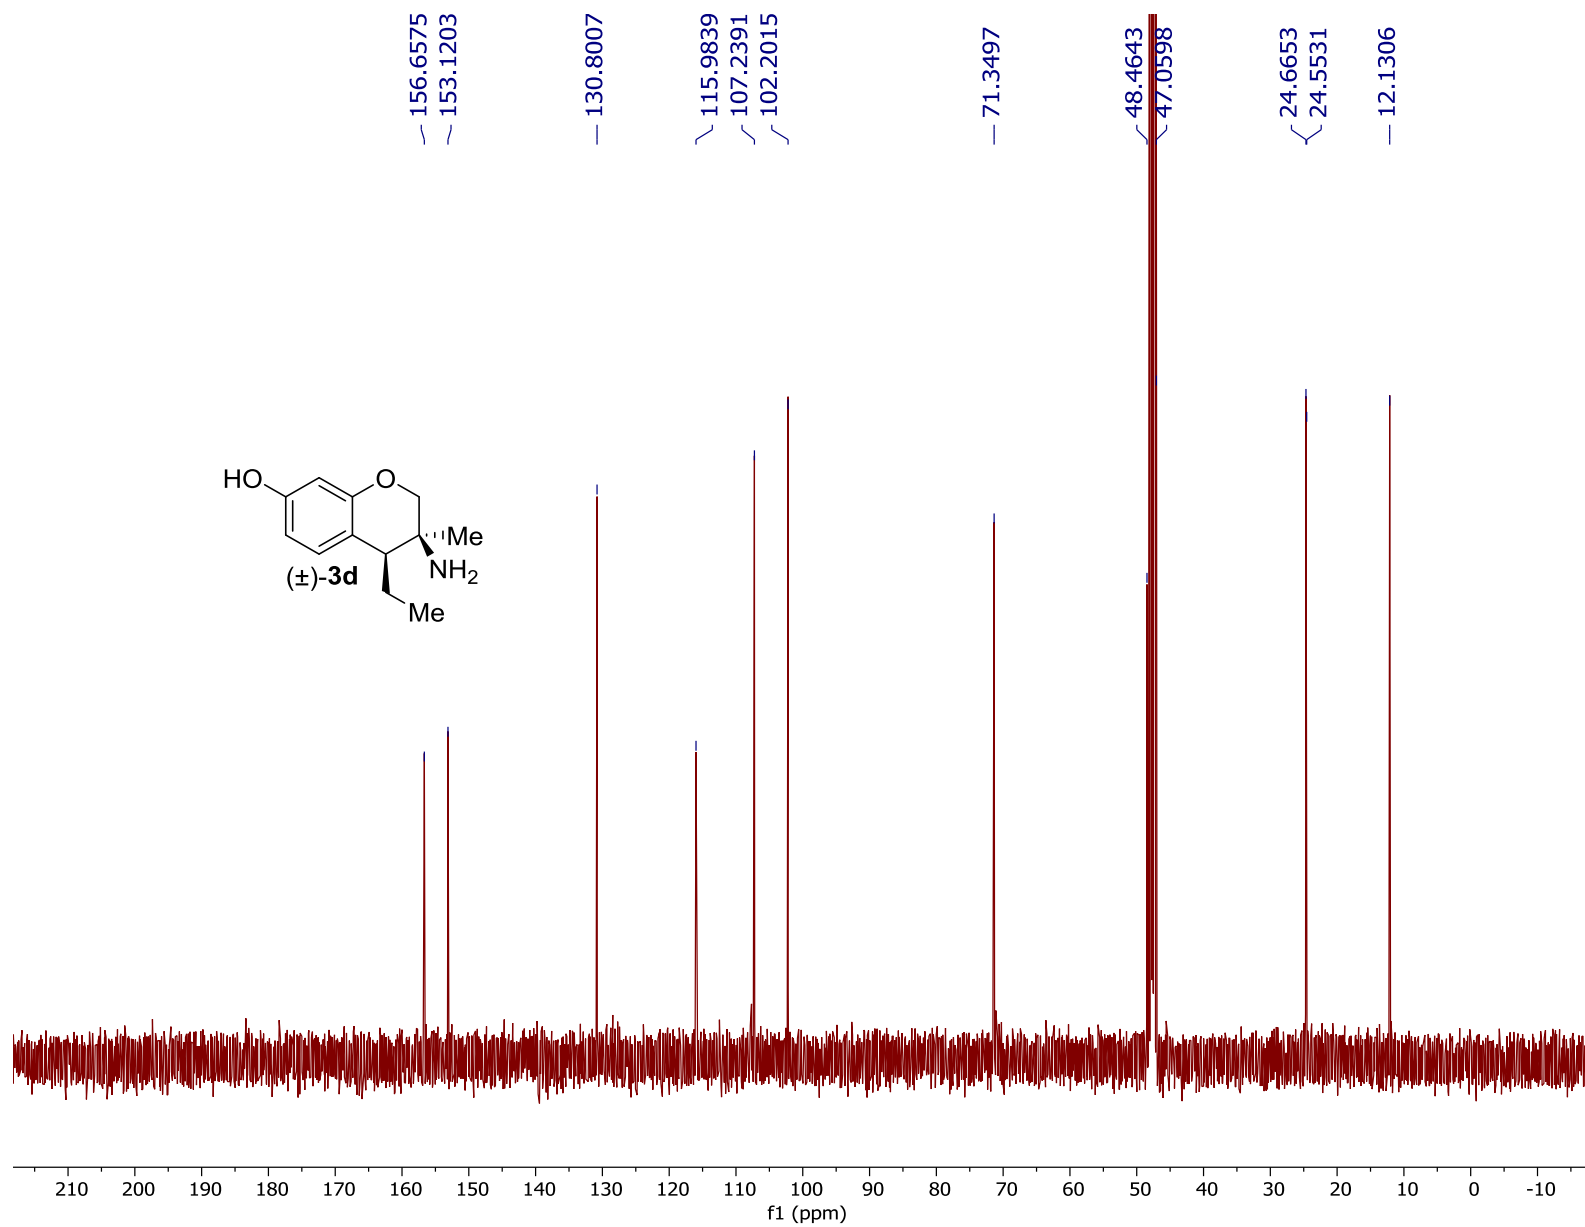

Compound 3d, 126 MHz <sup>13</sup>C NMR Spectrum in CD<sub>3</sub>OD

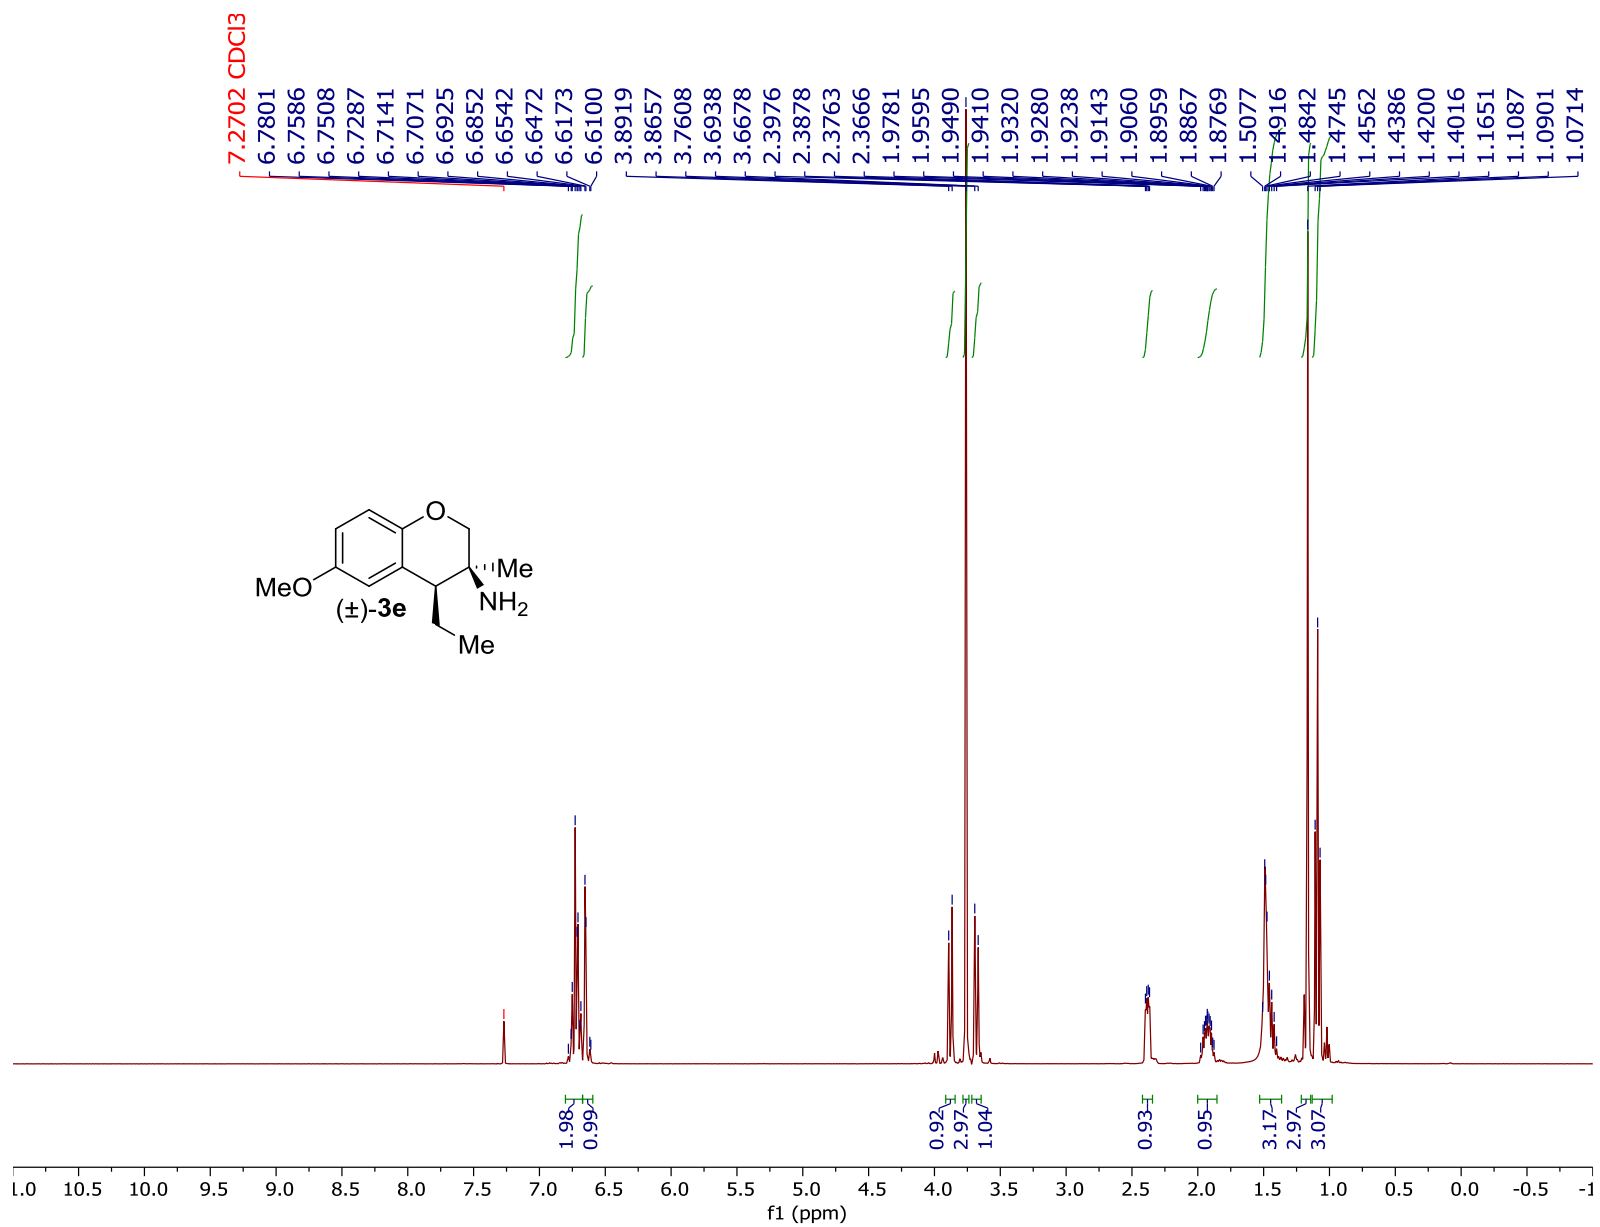

Compound 3e, 400 MHz <sup>1</sup>H NMR Spectrum in CDCl<sub>3</sub>

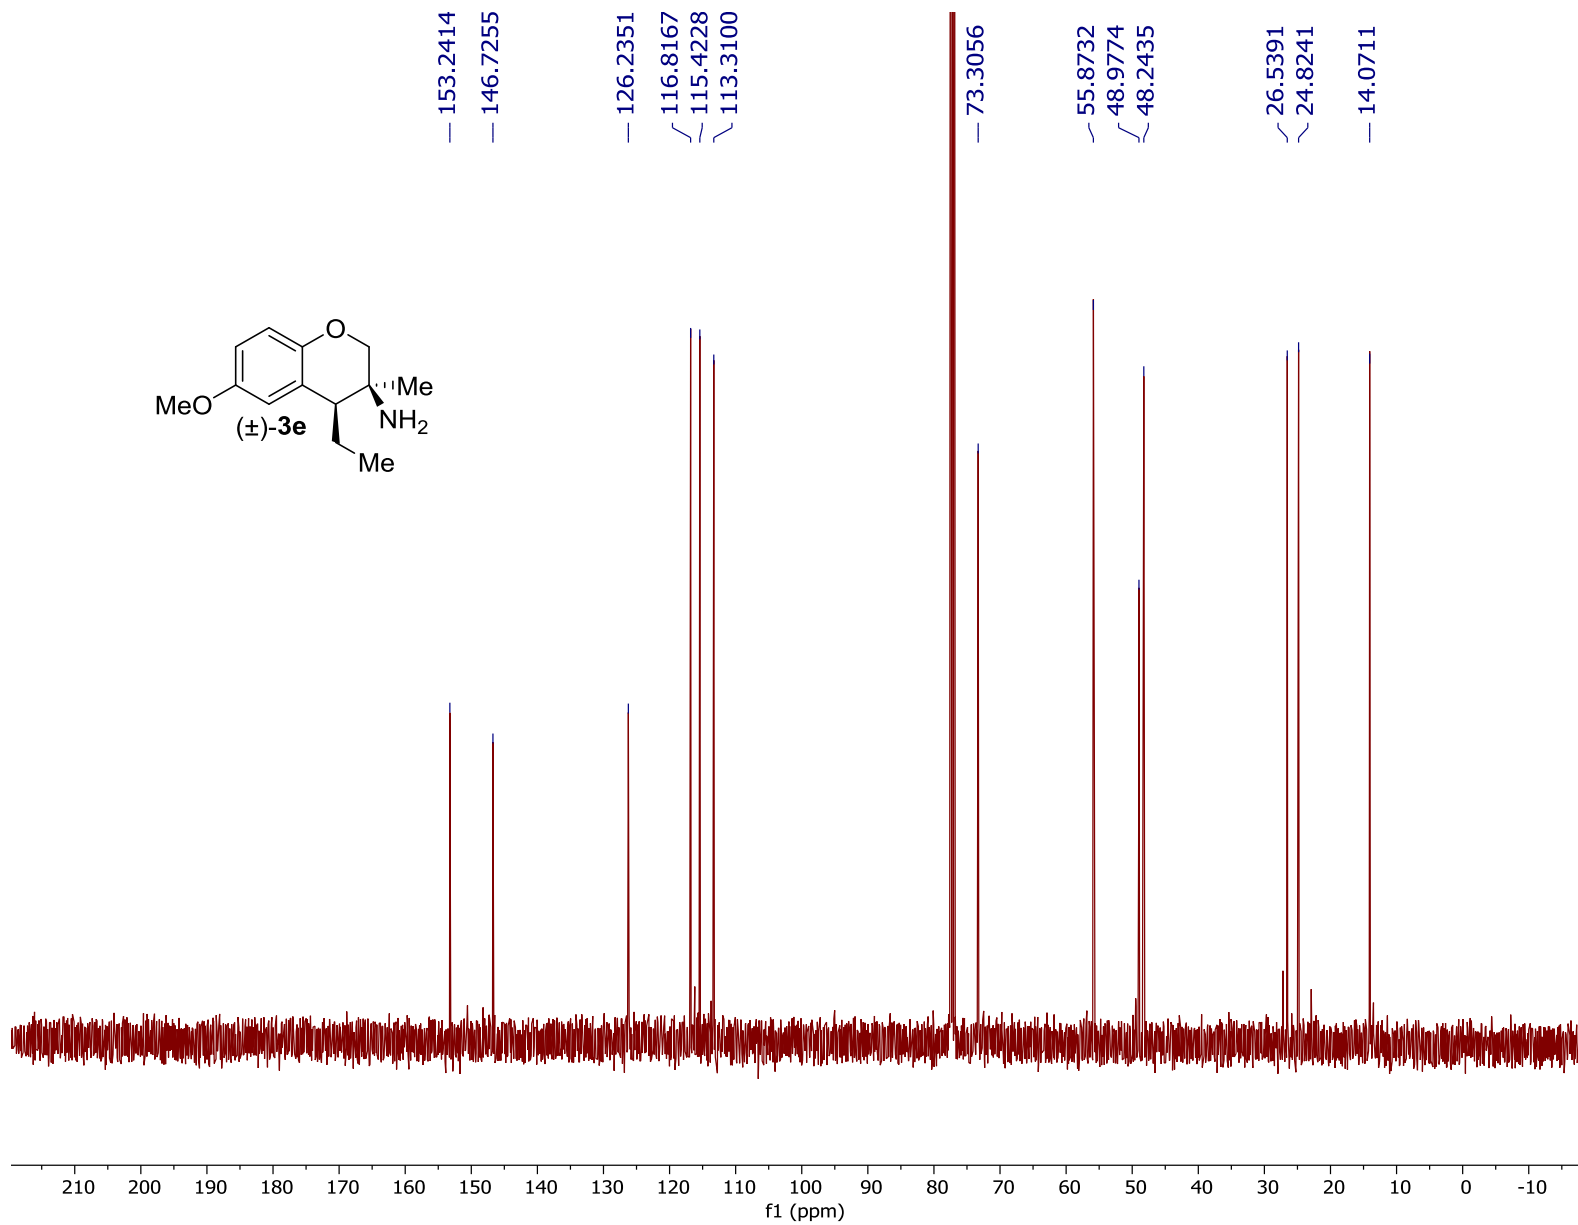

Compound 3e, 101 MHz  $^{13}\text{C}$  NMR Spectrum in  $\text{CDCl}_3$

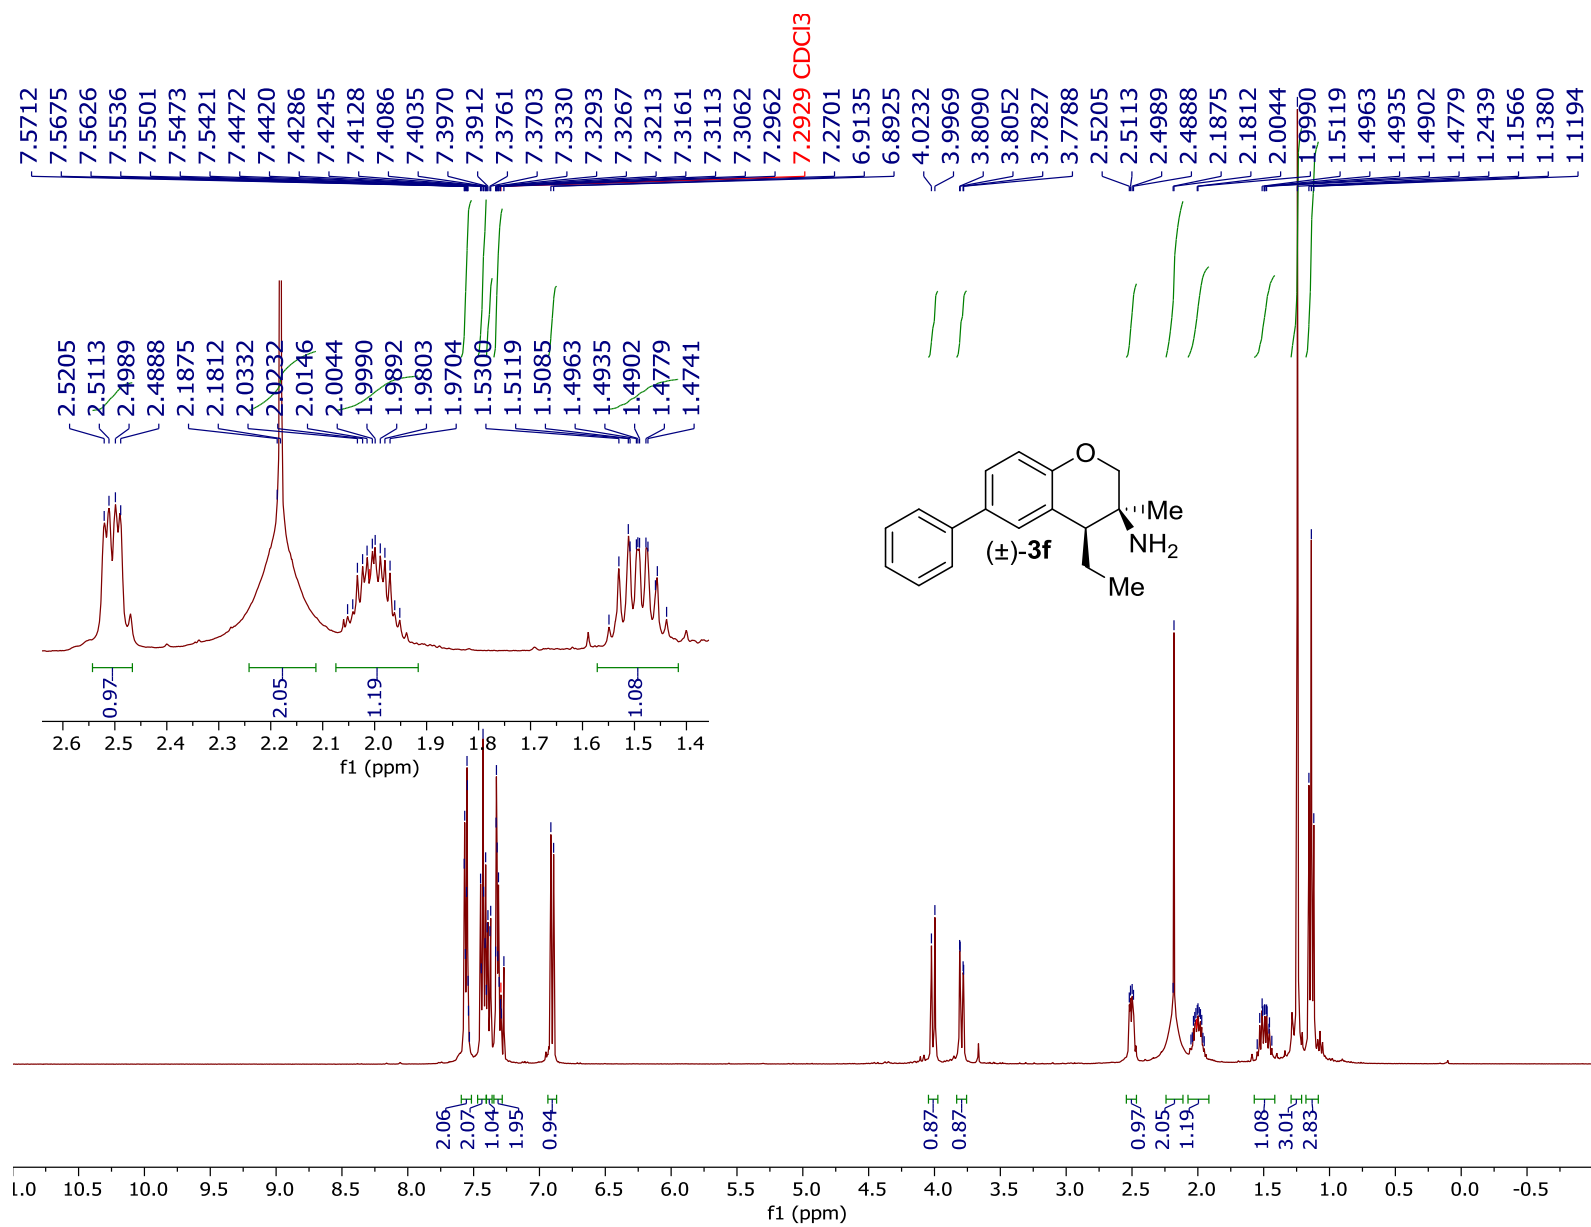



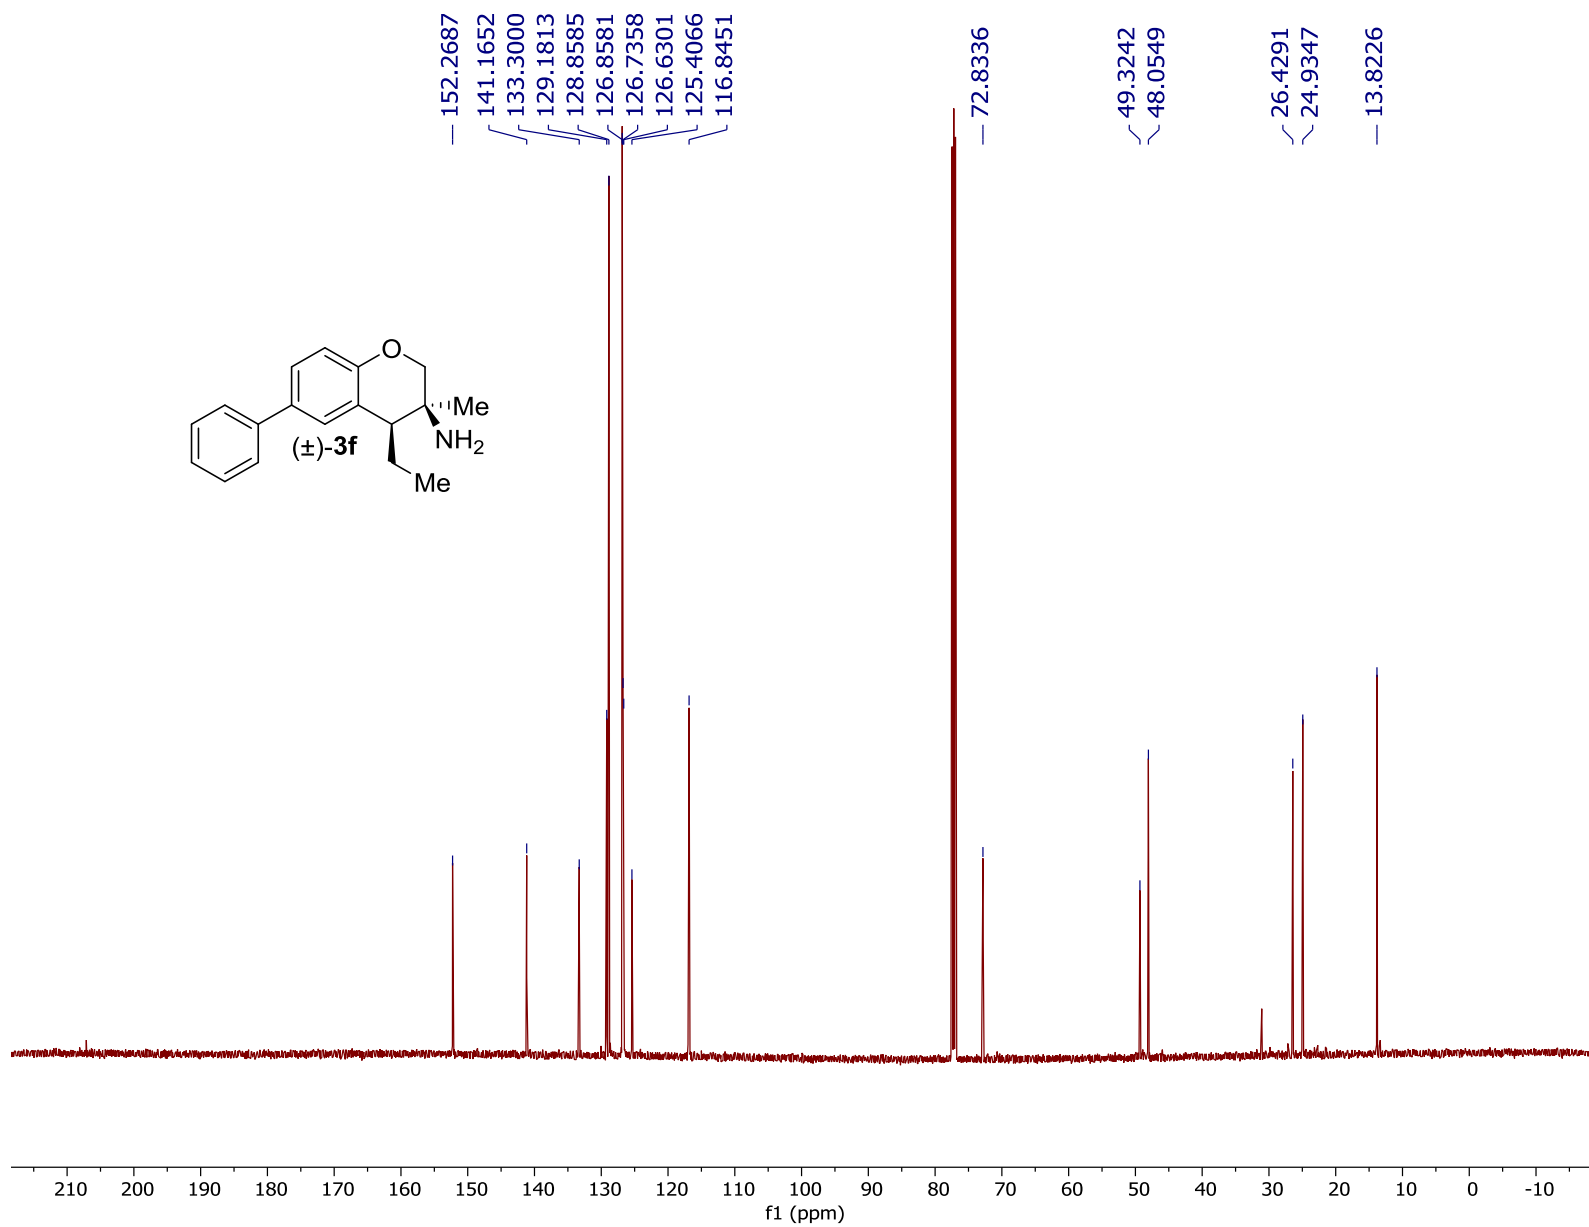

Compound 3f, 126 MHz <sup>13</sup>C NMR Spectrum in CDCl<sub>3</sub>

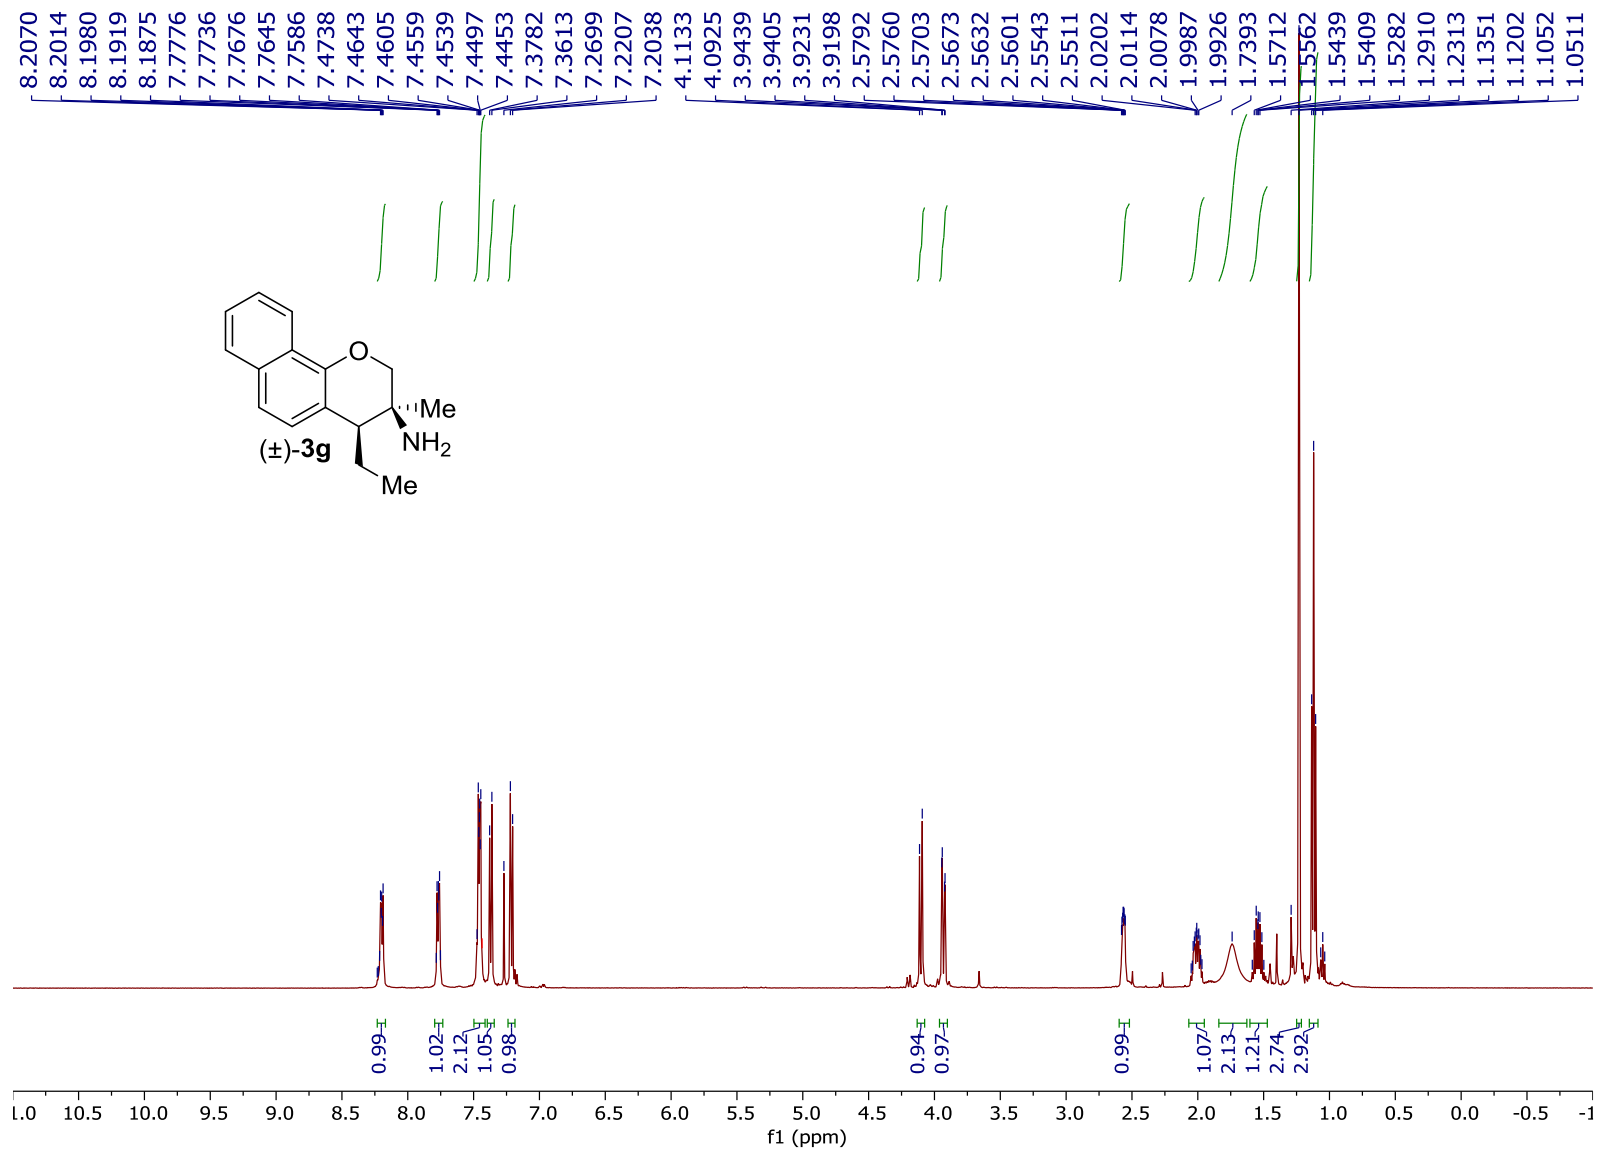

Compound 3g, 500 MHz <sup>1</sup>H NMR Spectrum in CDCl<sub>3</sub>

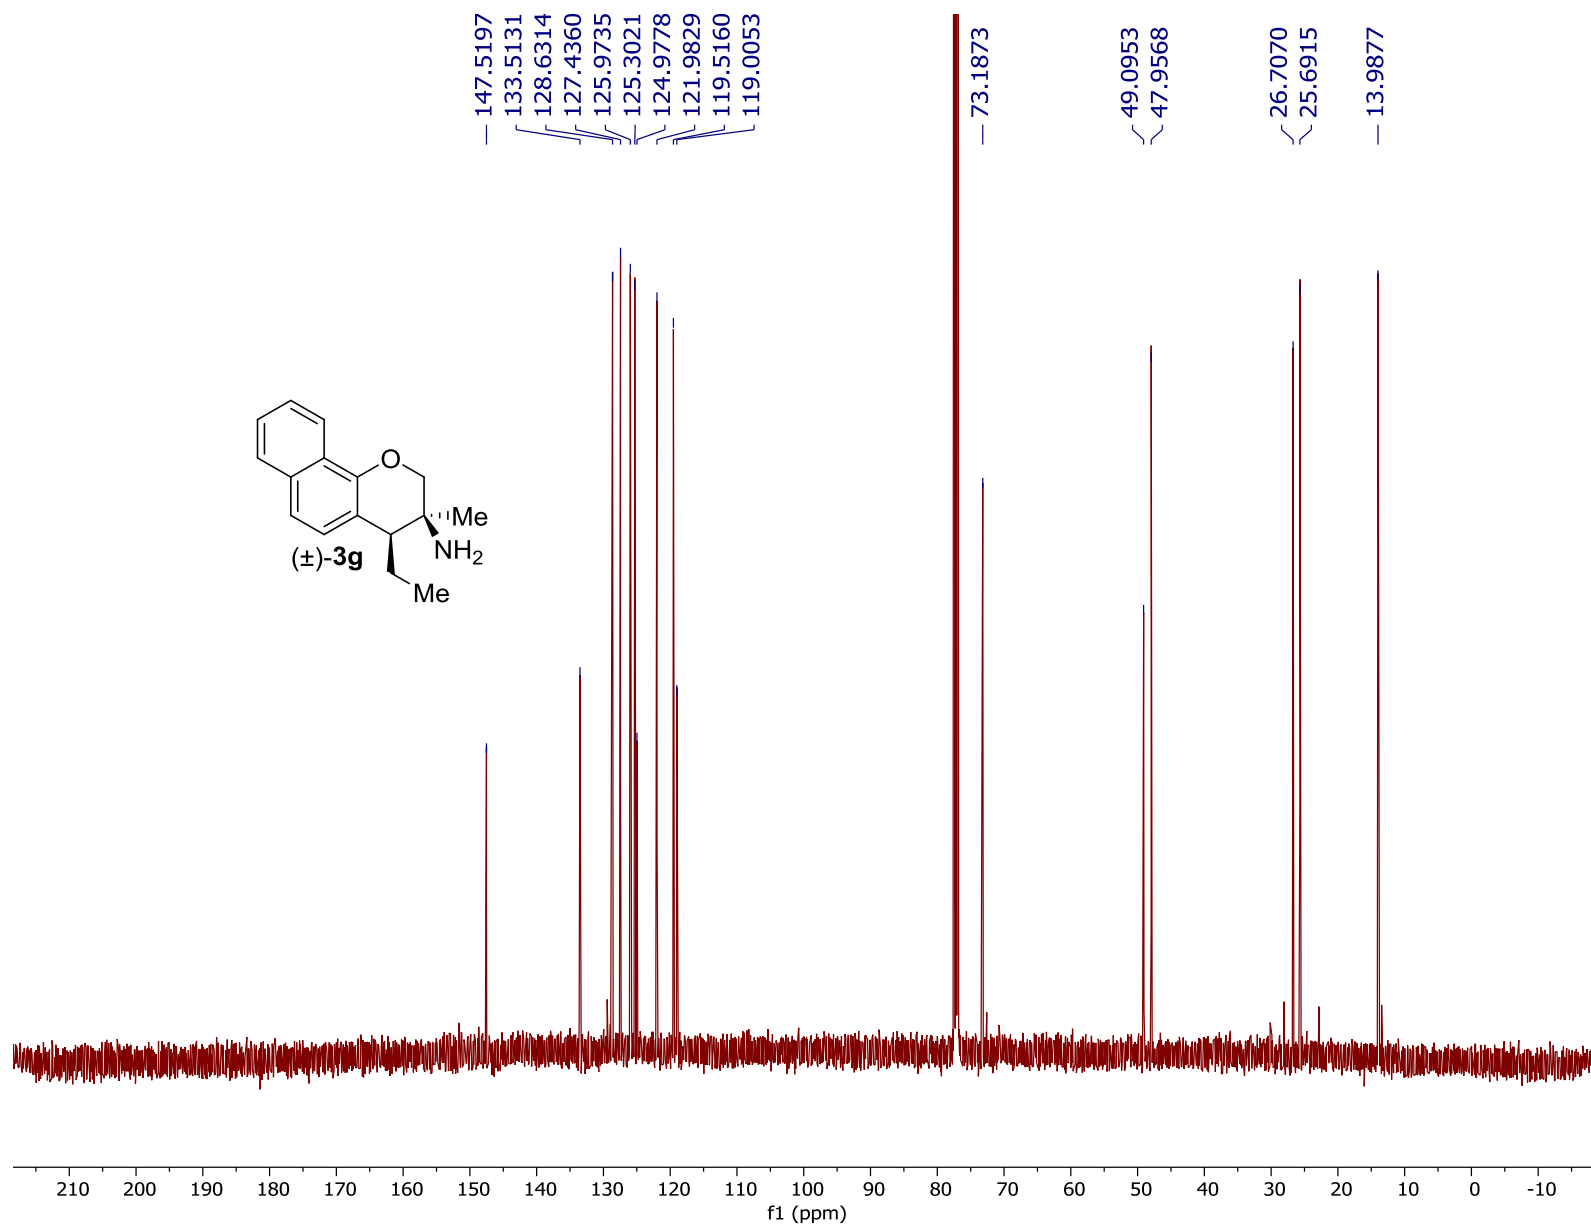

Compound 3g, 126 MHz <sup>13</sup>C NMR Spectrum in CDCl<sub>3</sub>

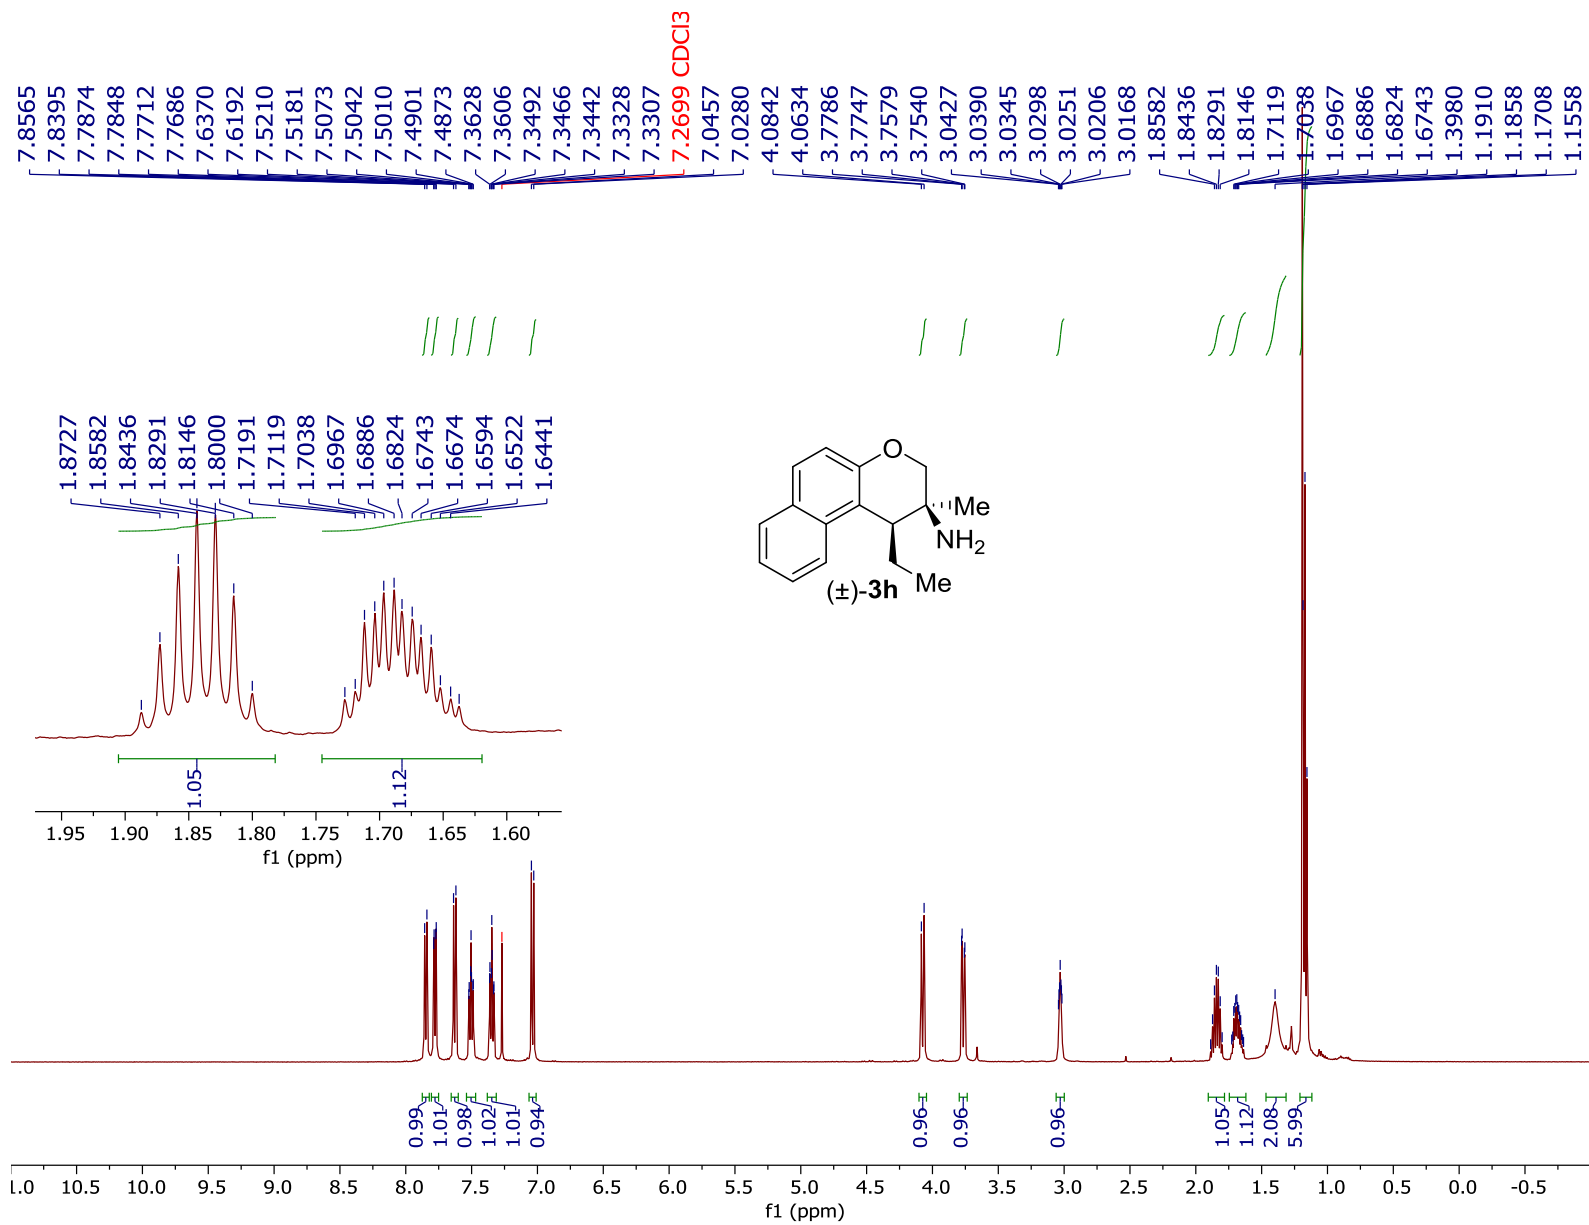

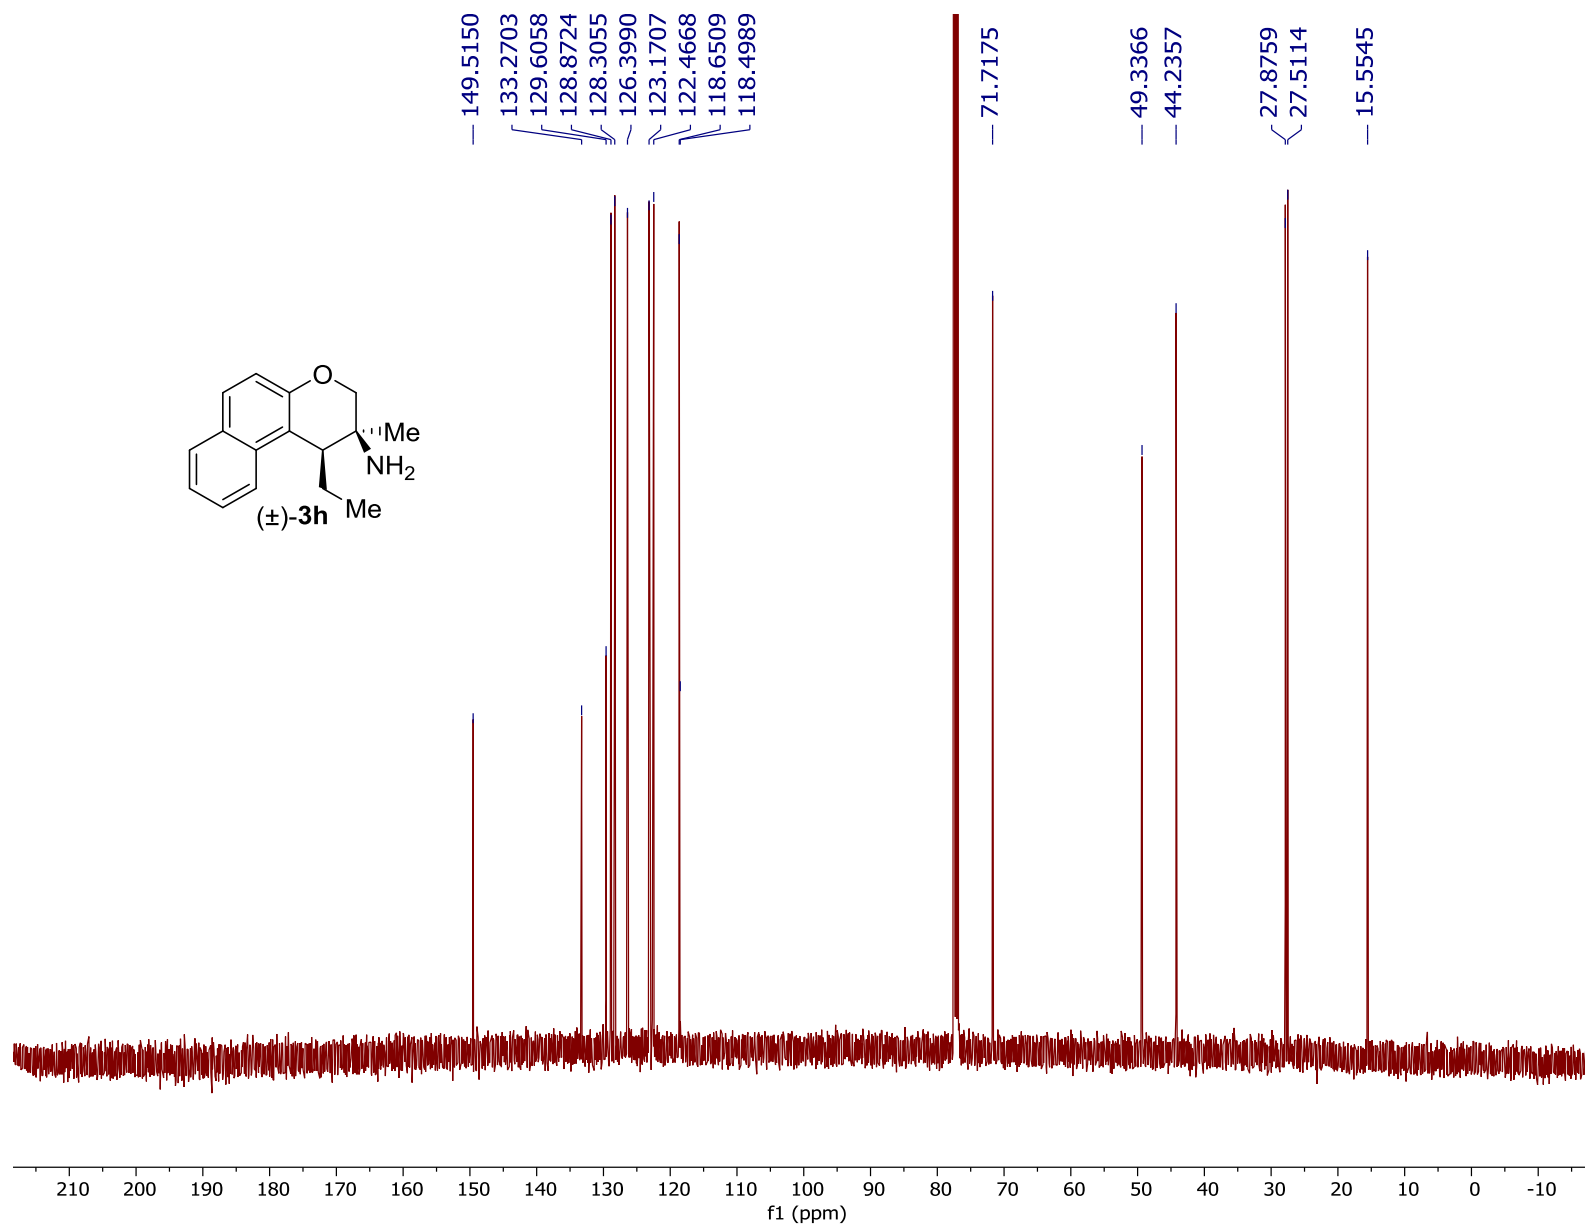

Compound 3h, 126 MHz <sup>13</sup>C NMR Spectrum in CDCl<sub>3</sub>



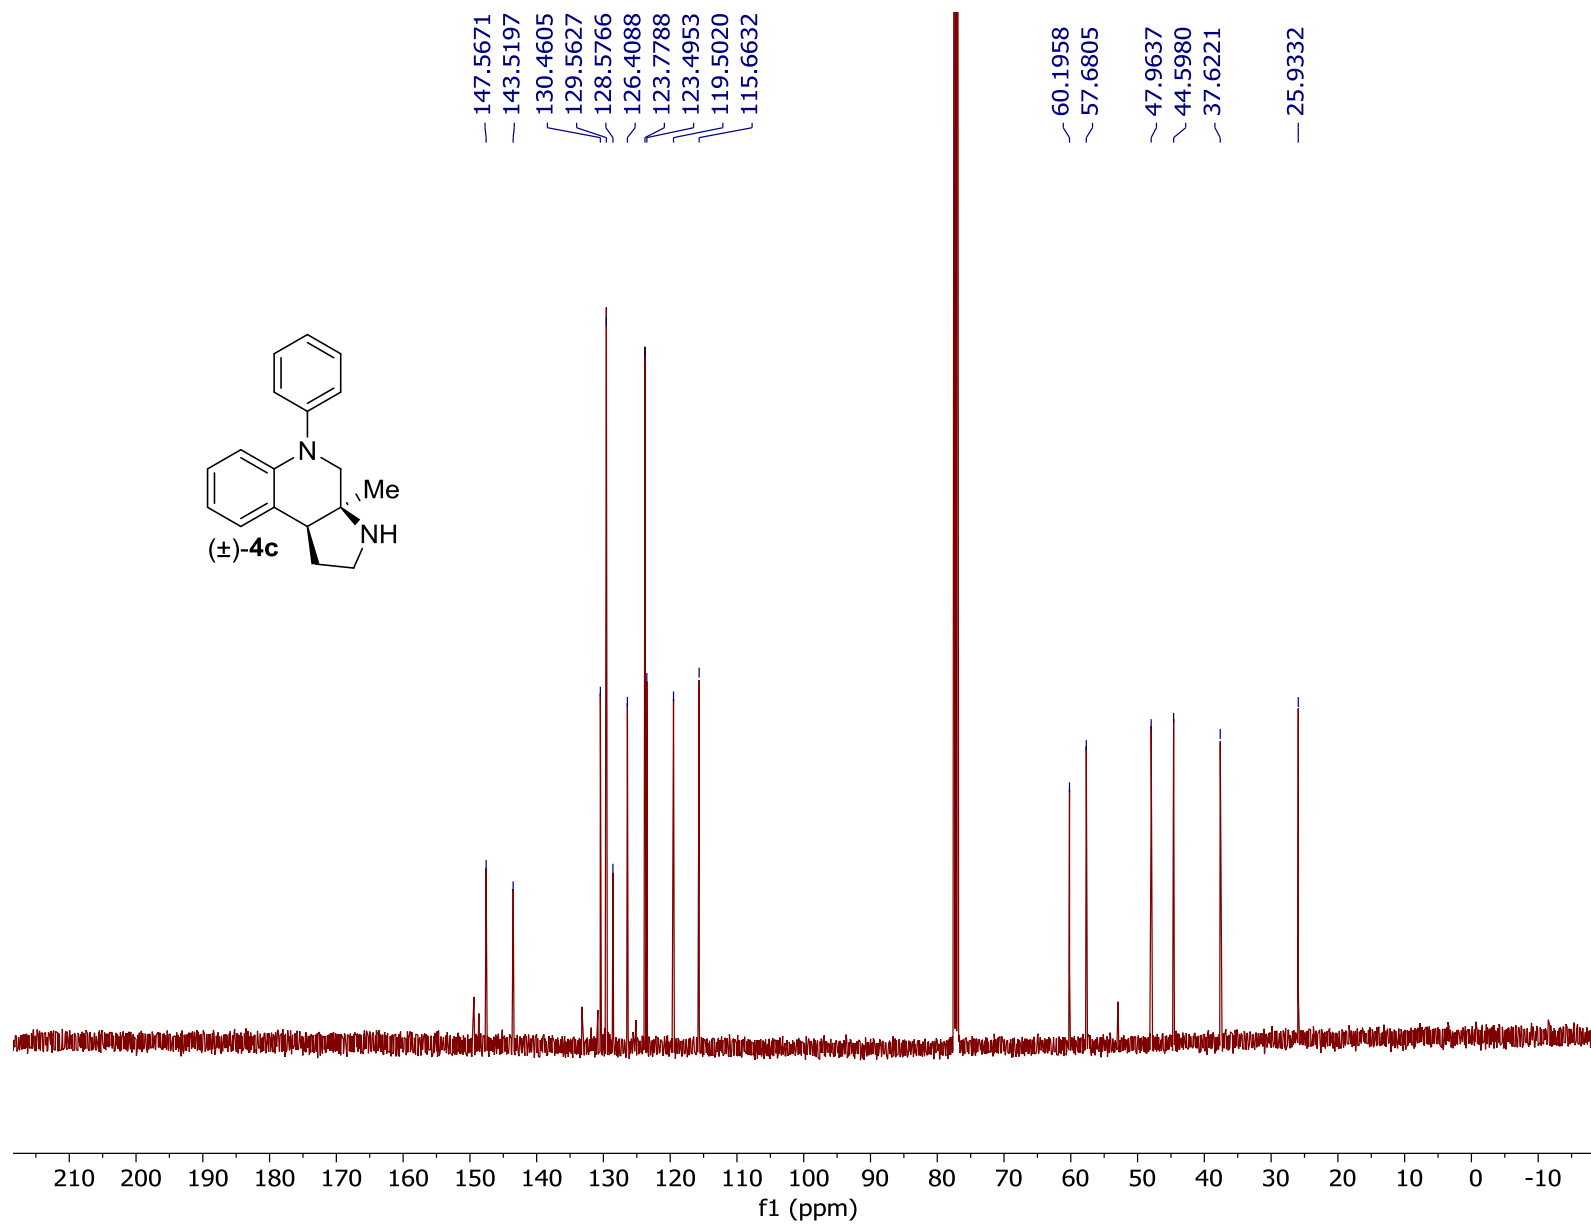

Compound 4c, 126 MHz <sup>13</sup>C NMR Spectrum in CDCl<sub>3</sub>

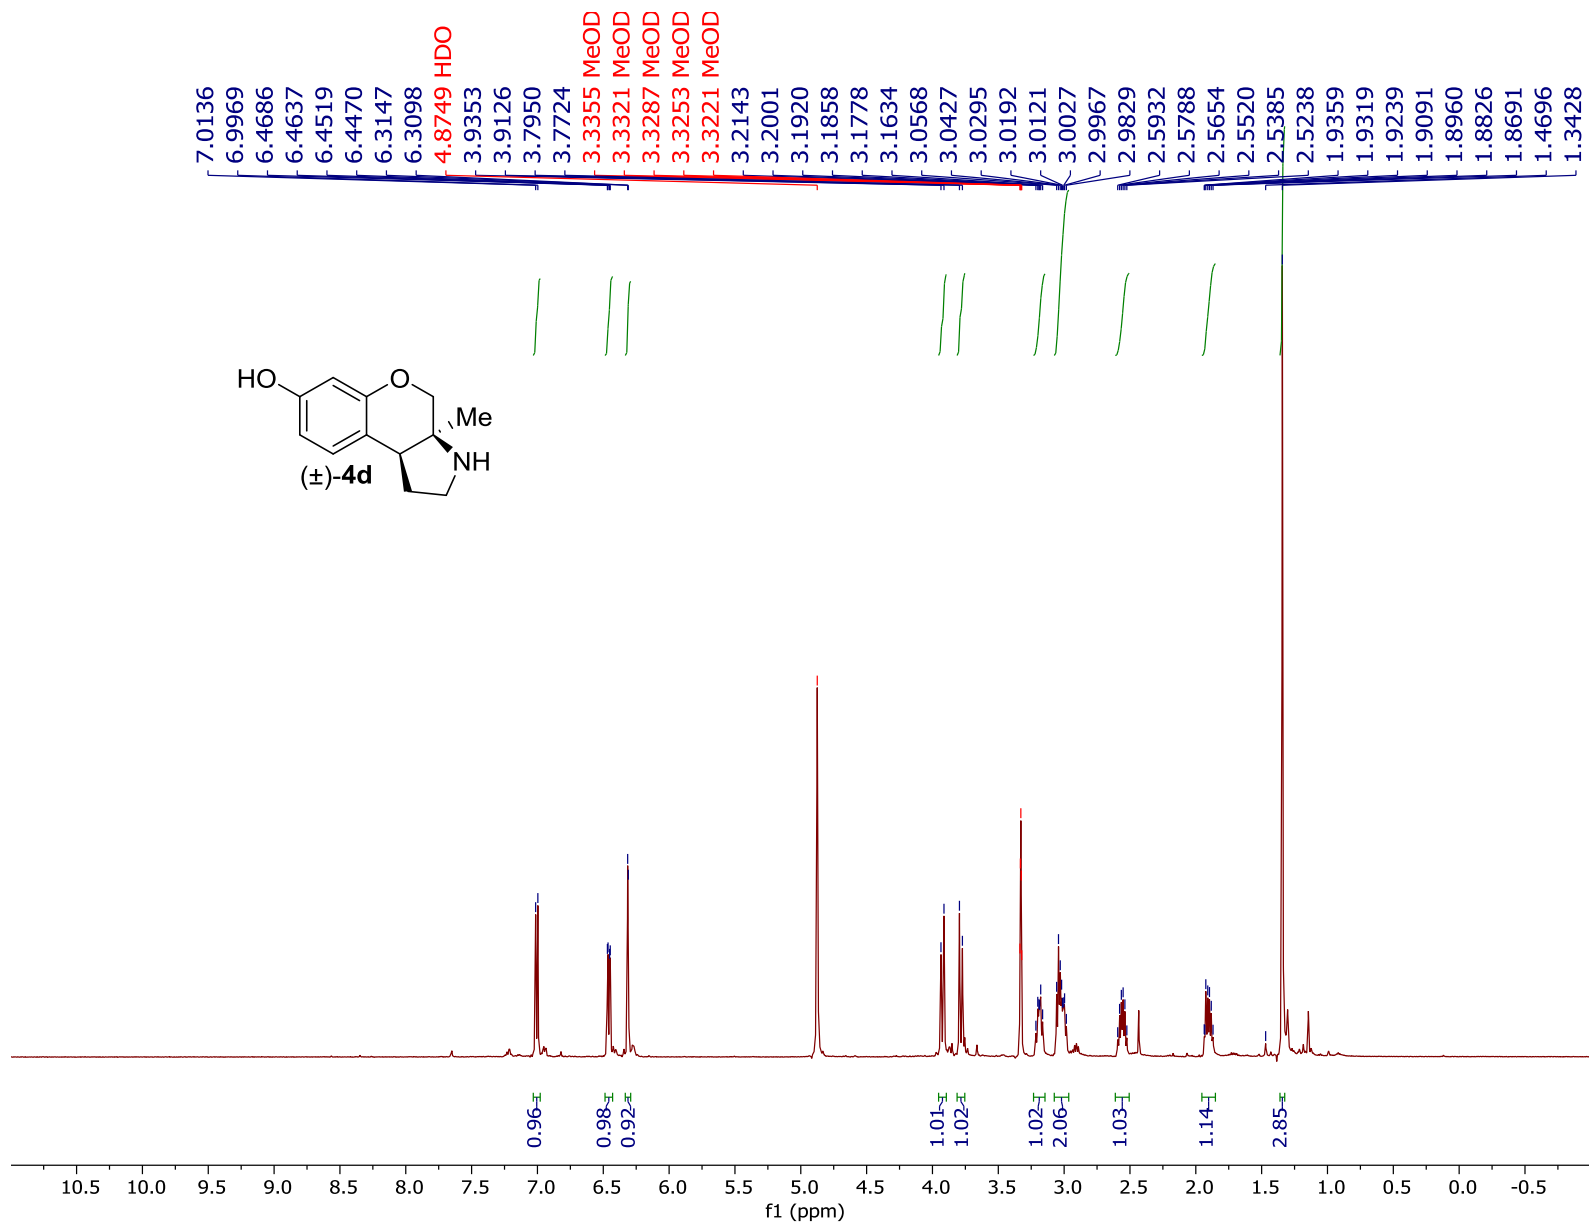

Compound 4d, 500 MHz  $^1\text{H}$  NMR Spectrum in  $\text{CD}_3\text{OD}$



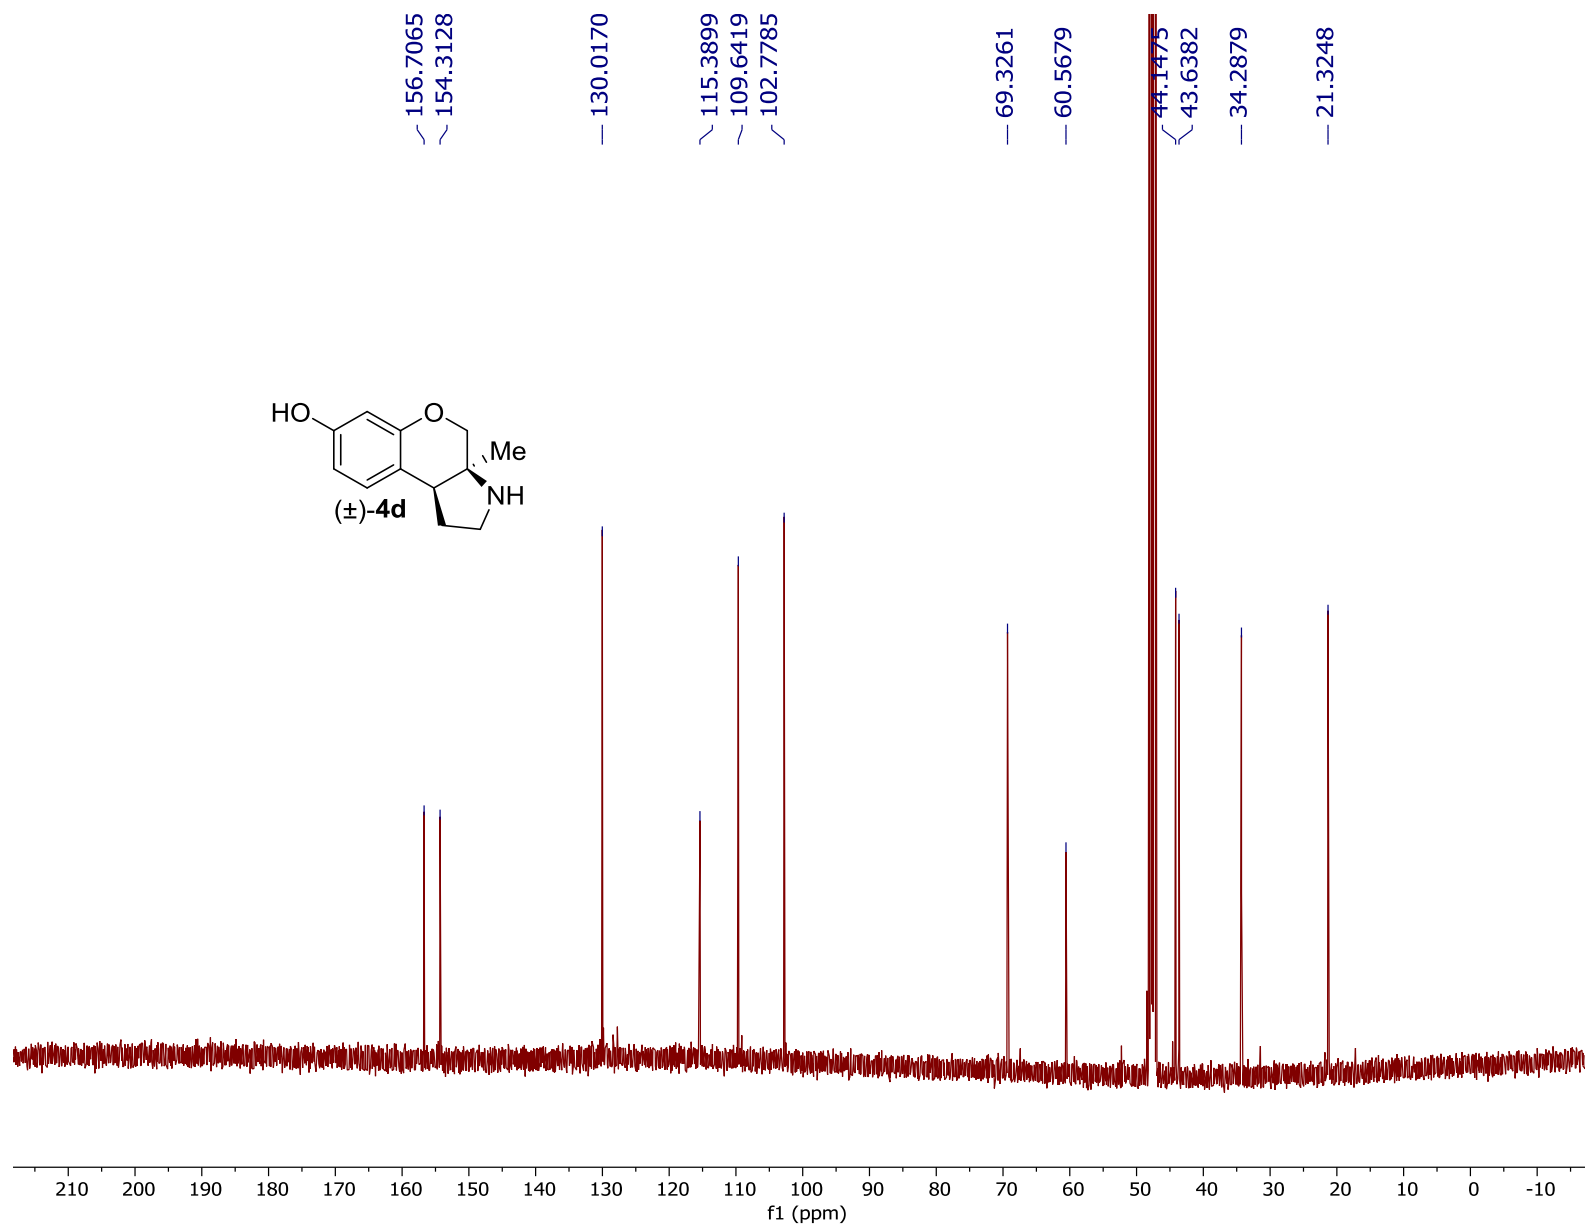

Compound 4d, 126 MHz <sup>13</sup>C NMR Spectrum in CD<sub>3</sub>OD

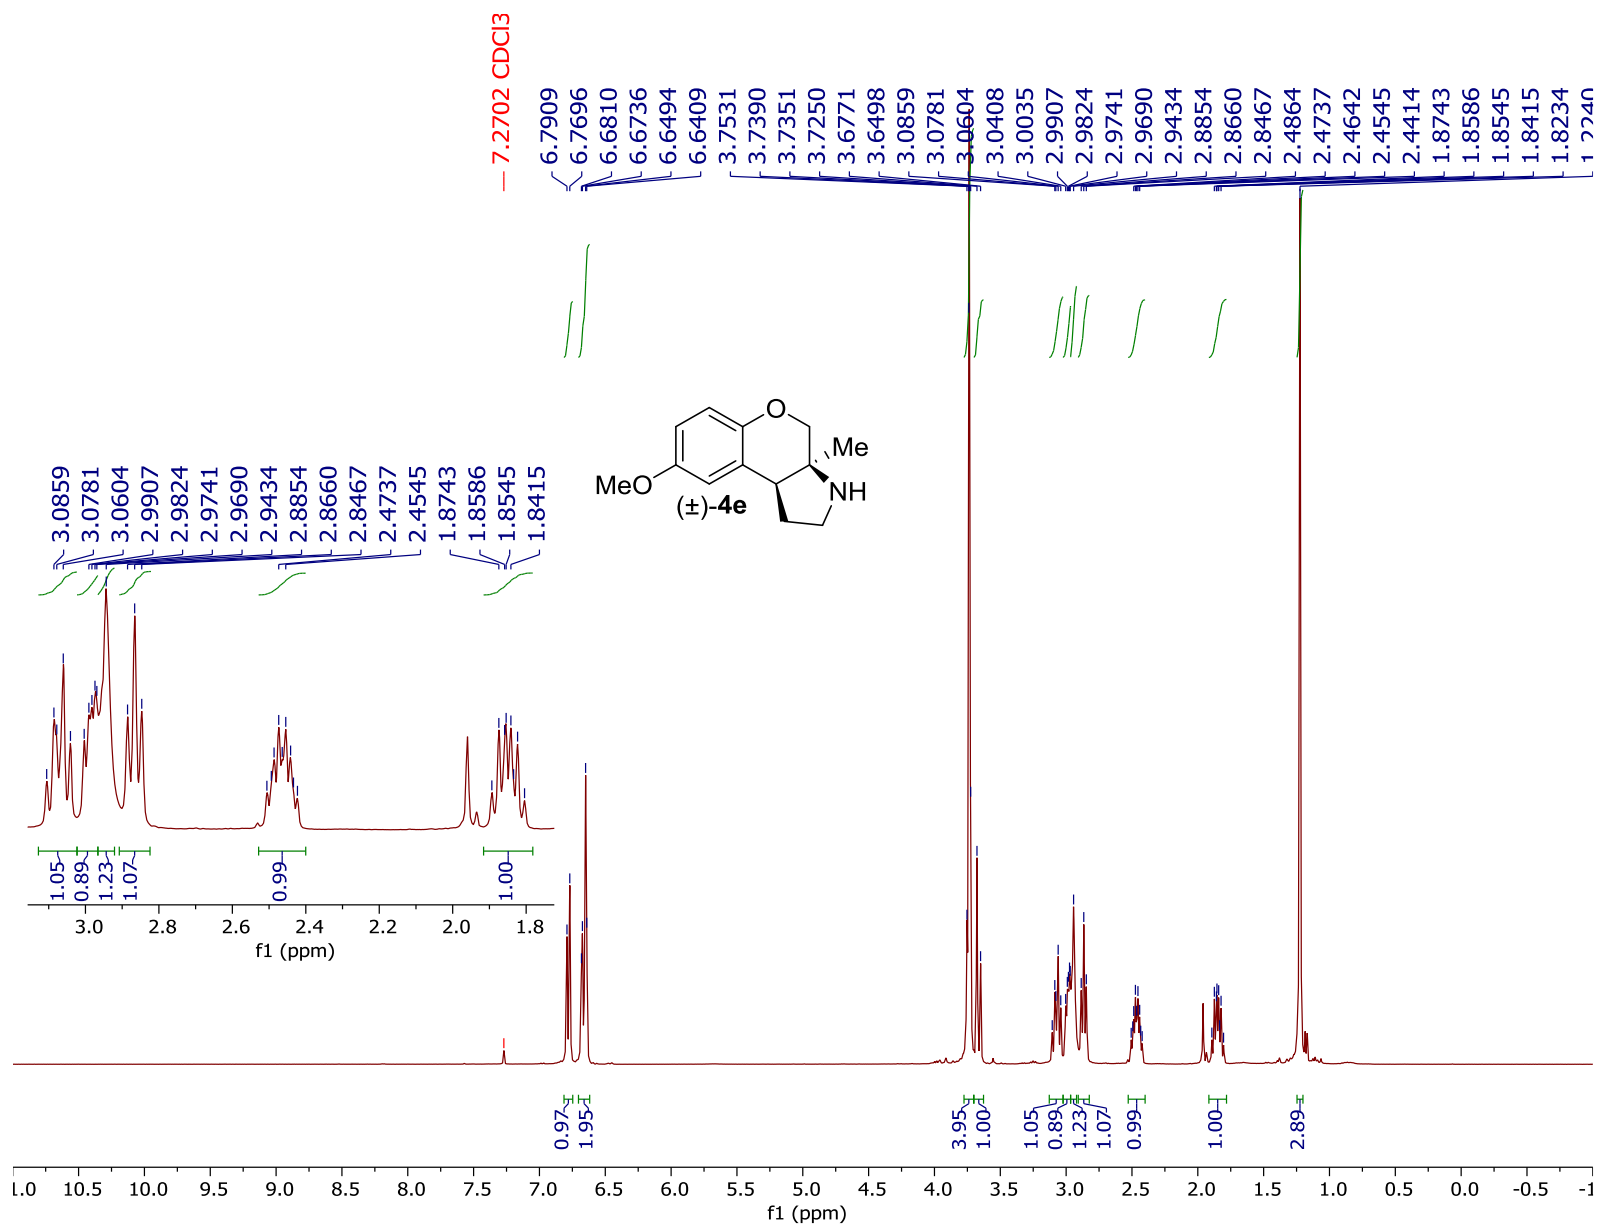

Compound 4e, 400 MHz <sup>1</sup>H NMR Spectrum in CDCl<sub>3</sub>

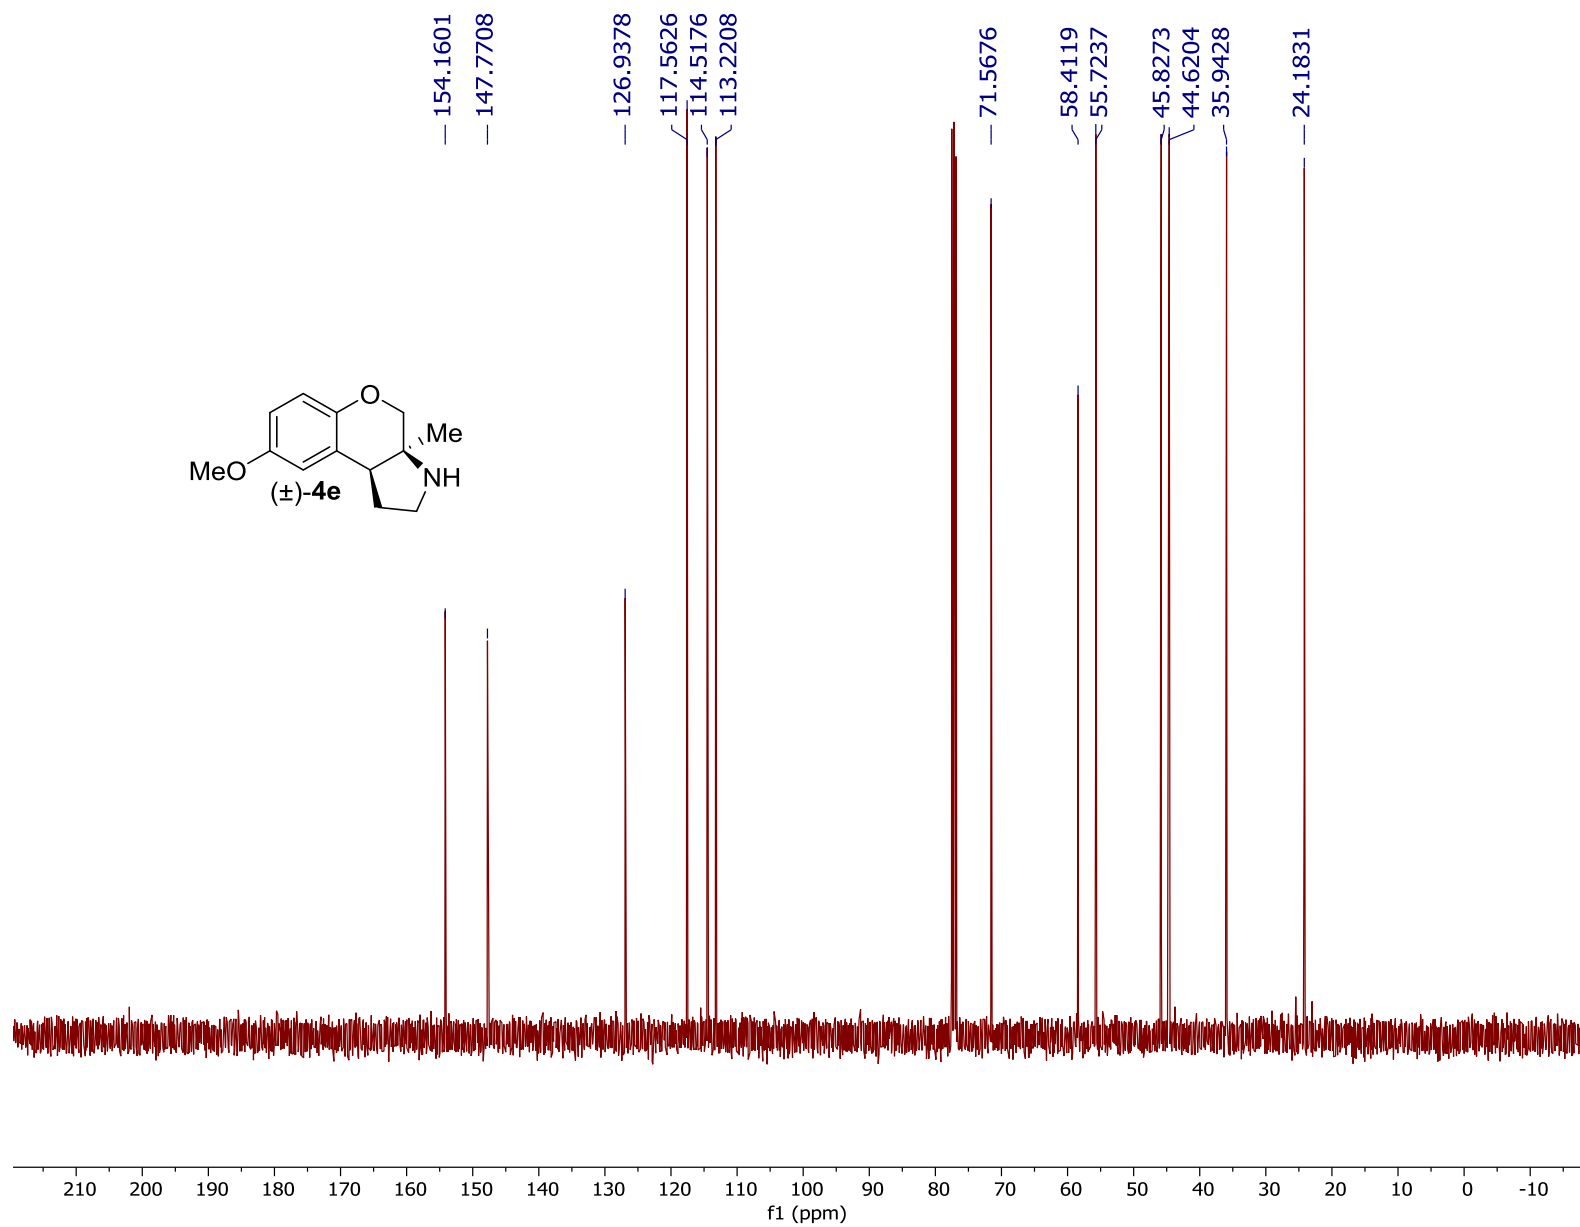

Compound 4e, 101 MHz  $^{13}\text{C}$  NMR Spectrum in  $\text{CDCl}_3$

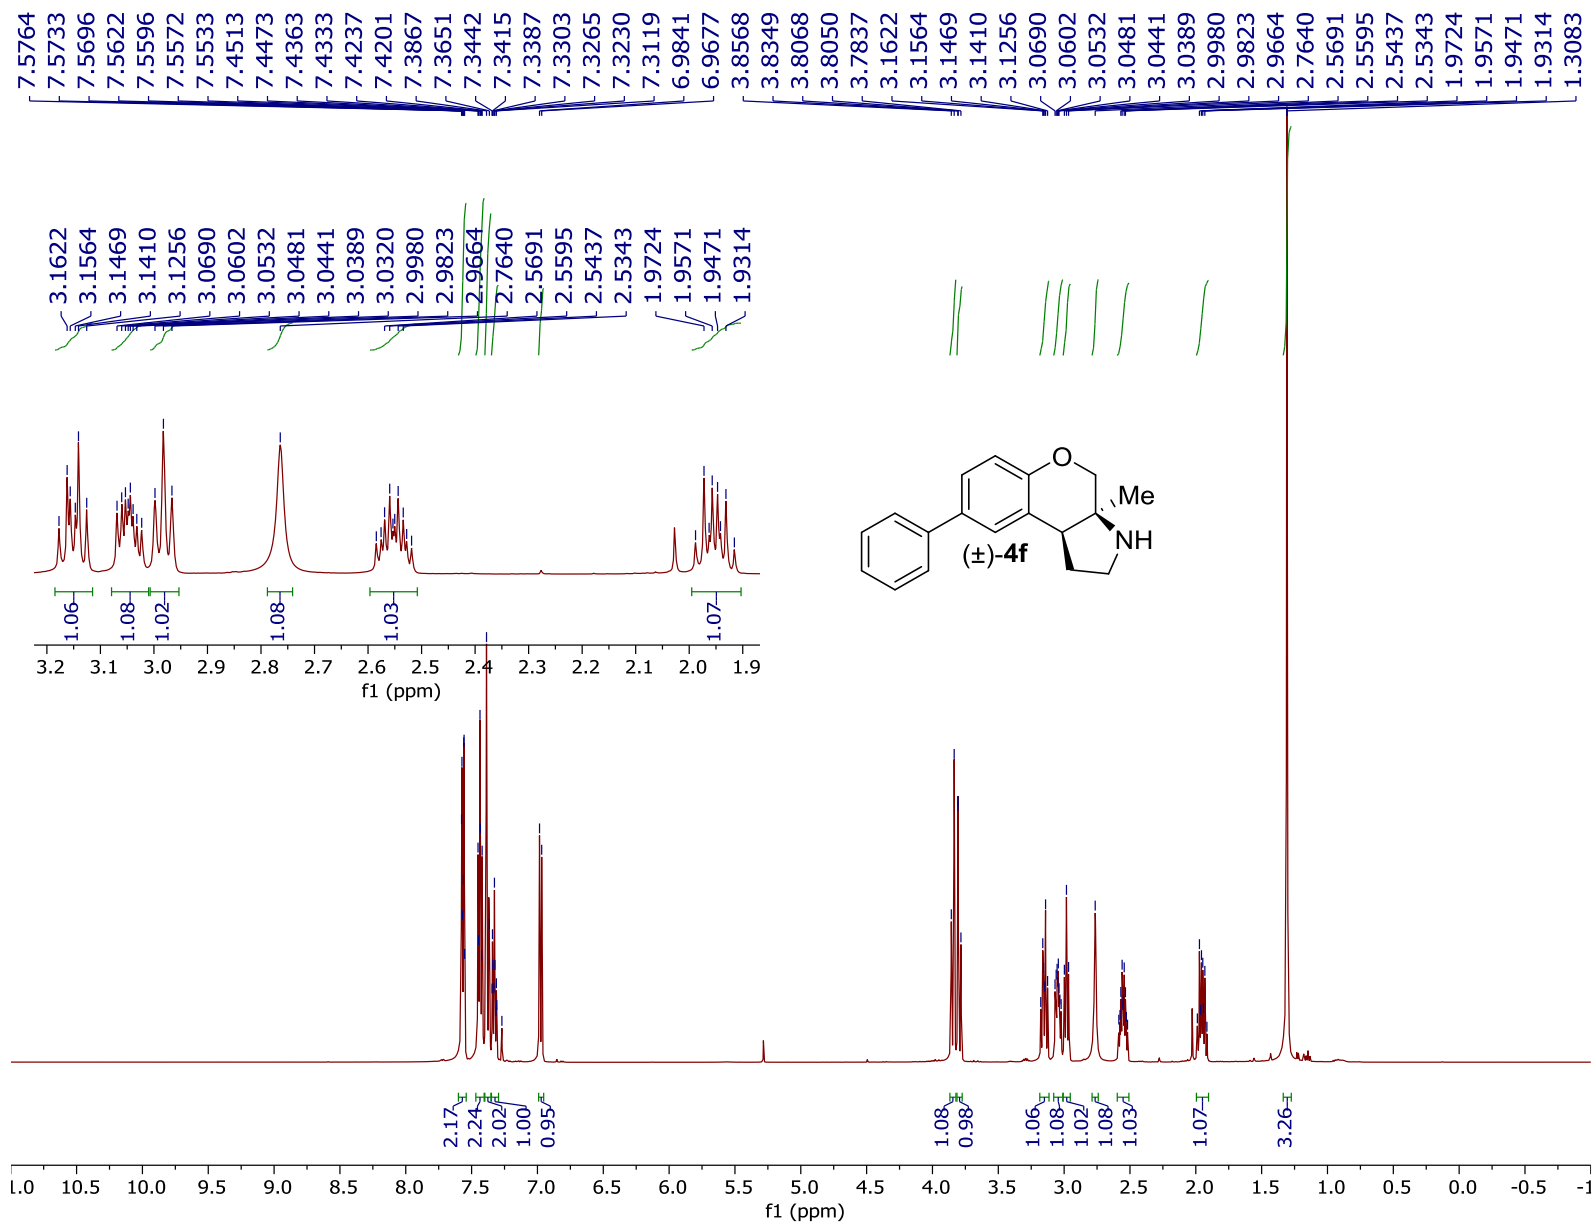

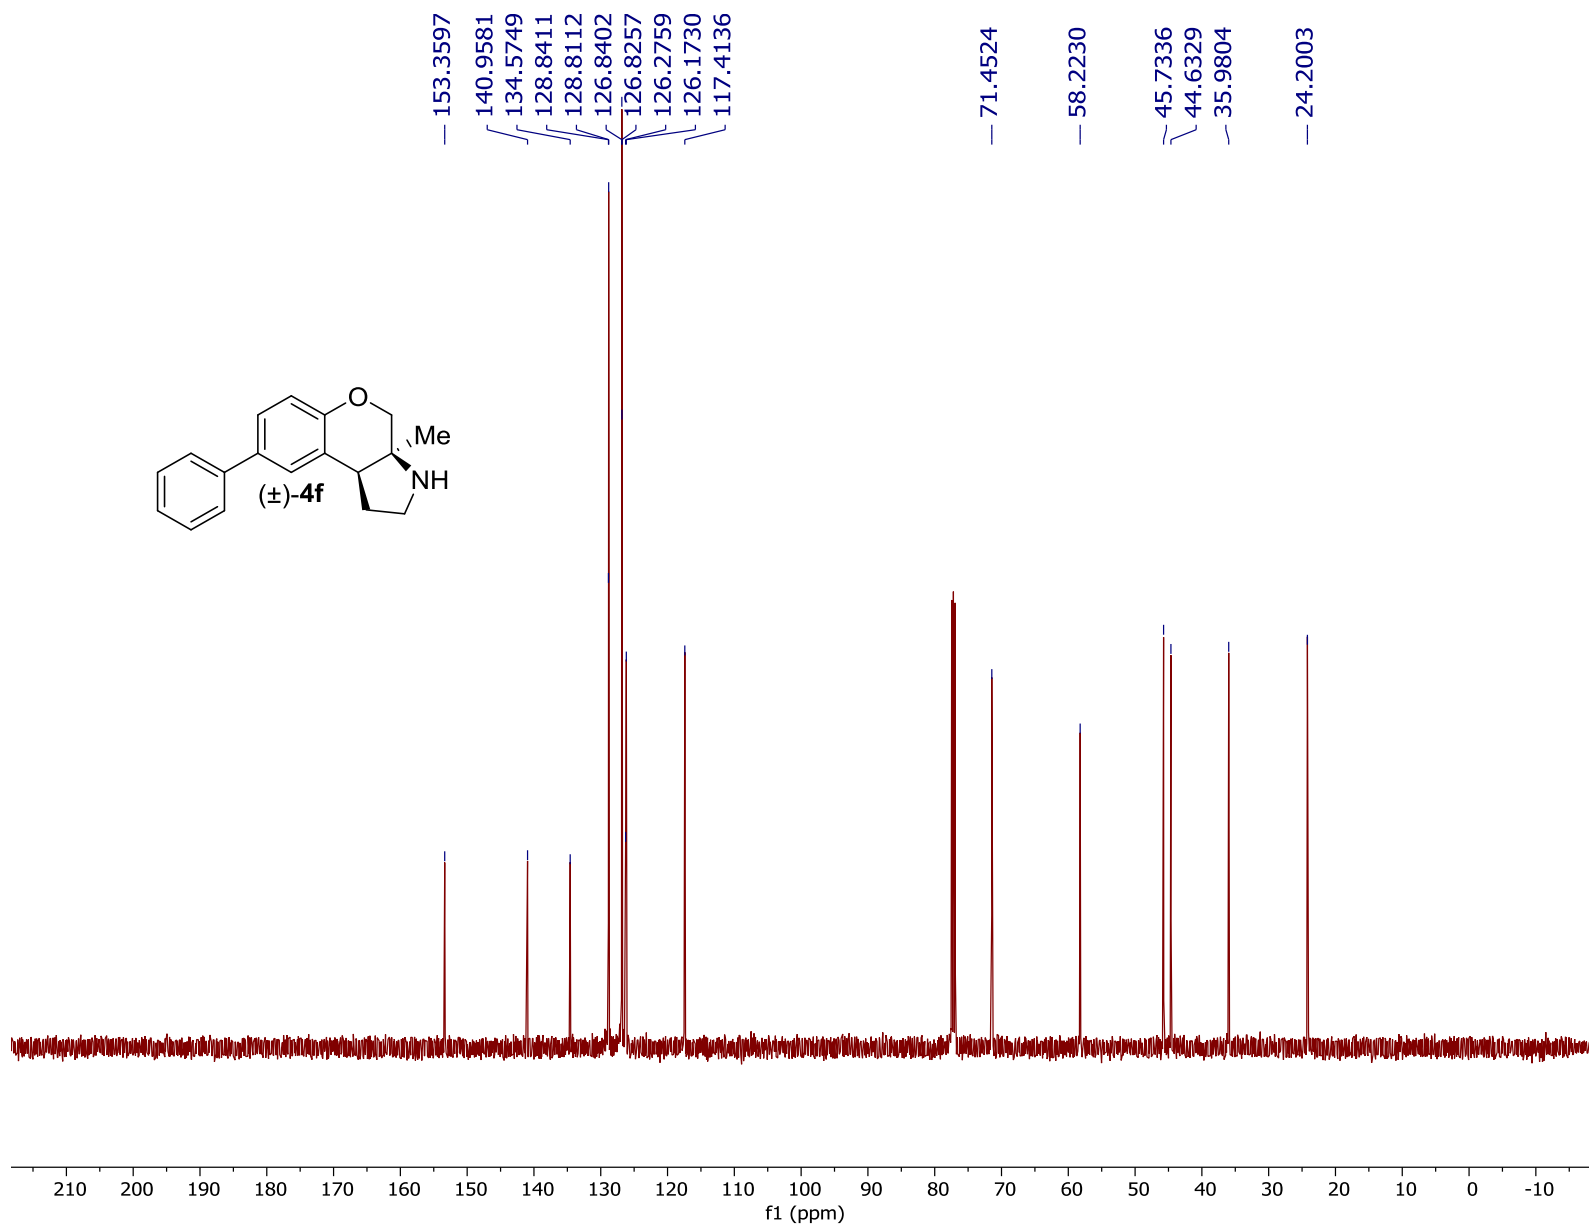

Compound 4f, 126 MHz  $^{13}\text{C}$  NMR Spectrum in  $\text{CDCl}_3$

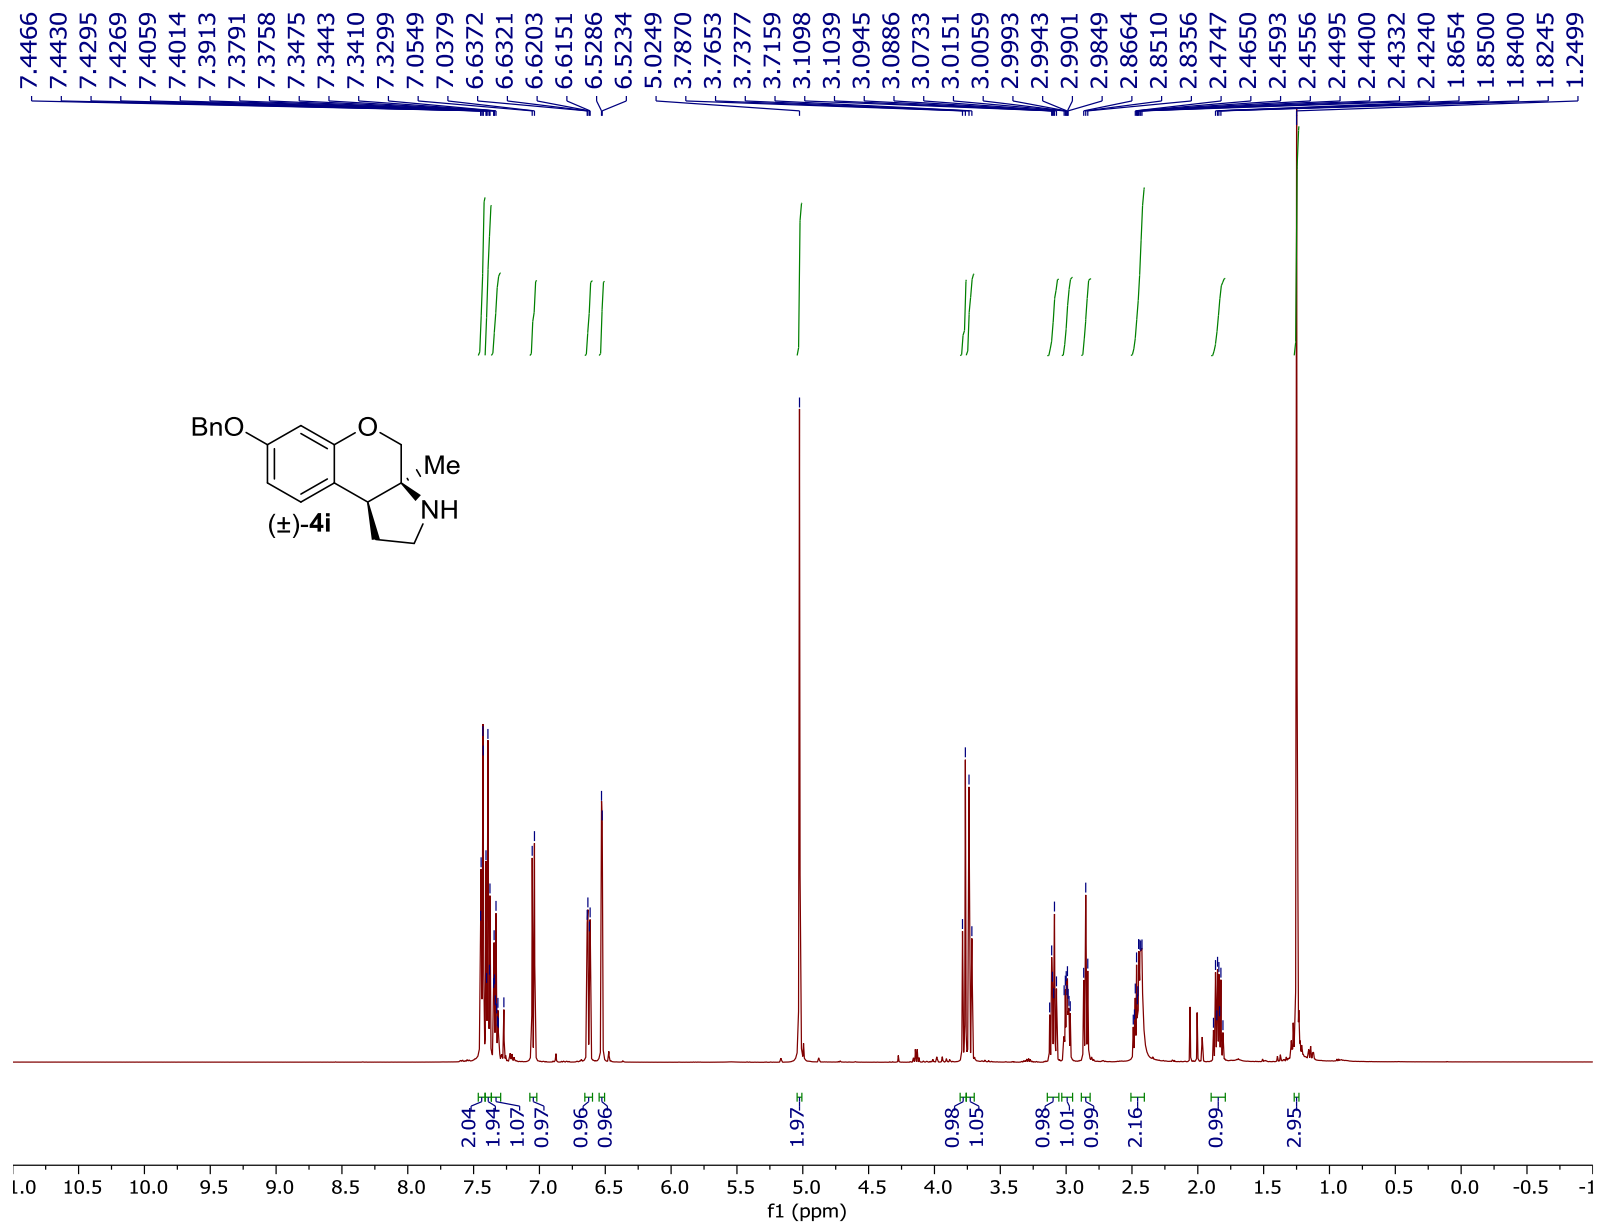

Compound 4i, 500 MHz <sup>1</sup>H NMR Spectrum in CDCl<sub>3</sub>

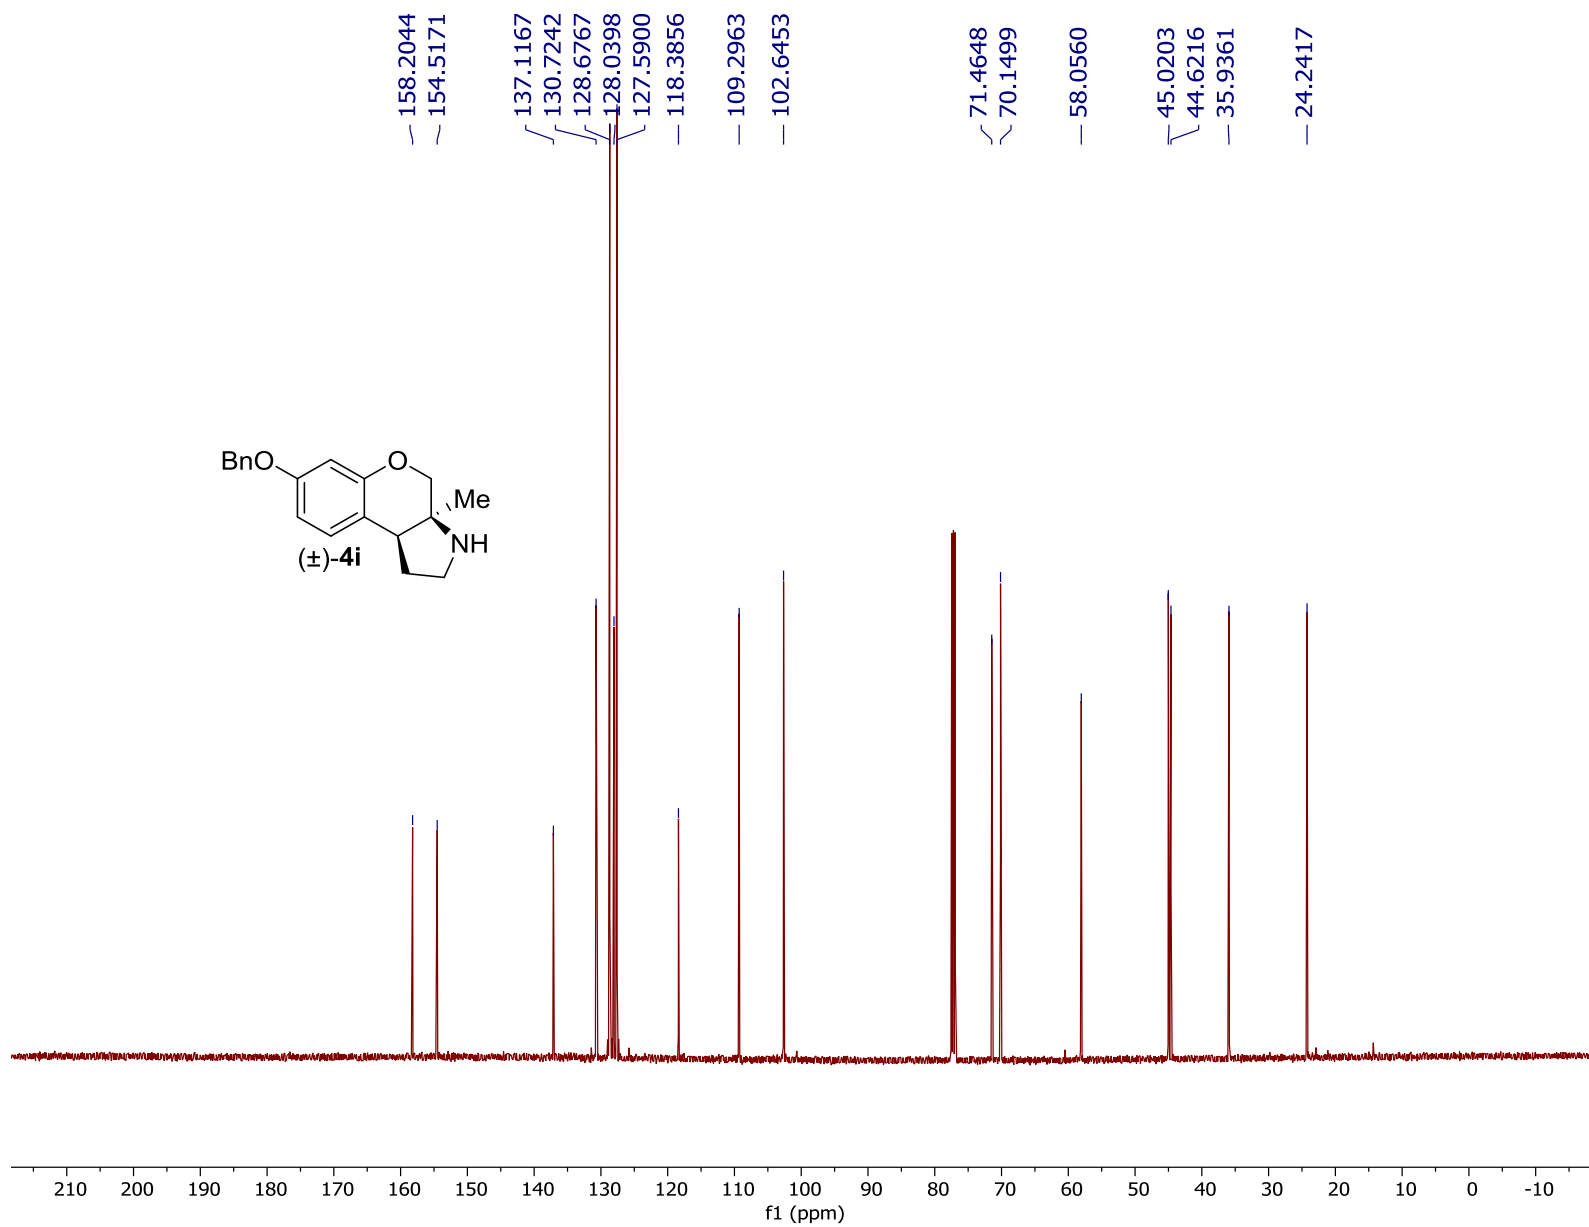

Compound 4i, 126 MHz  $^{13}\text{C}$  NMR Spectrum in  $\text{CDCl}_3$

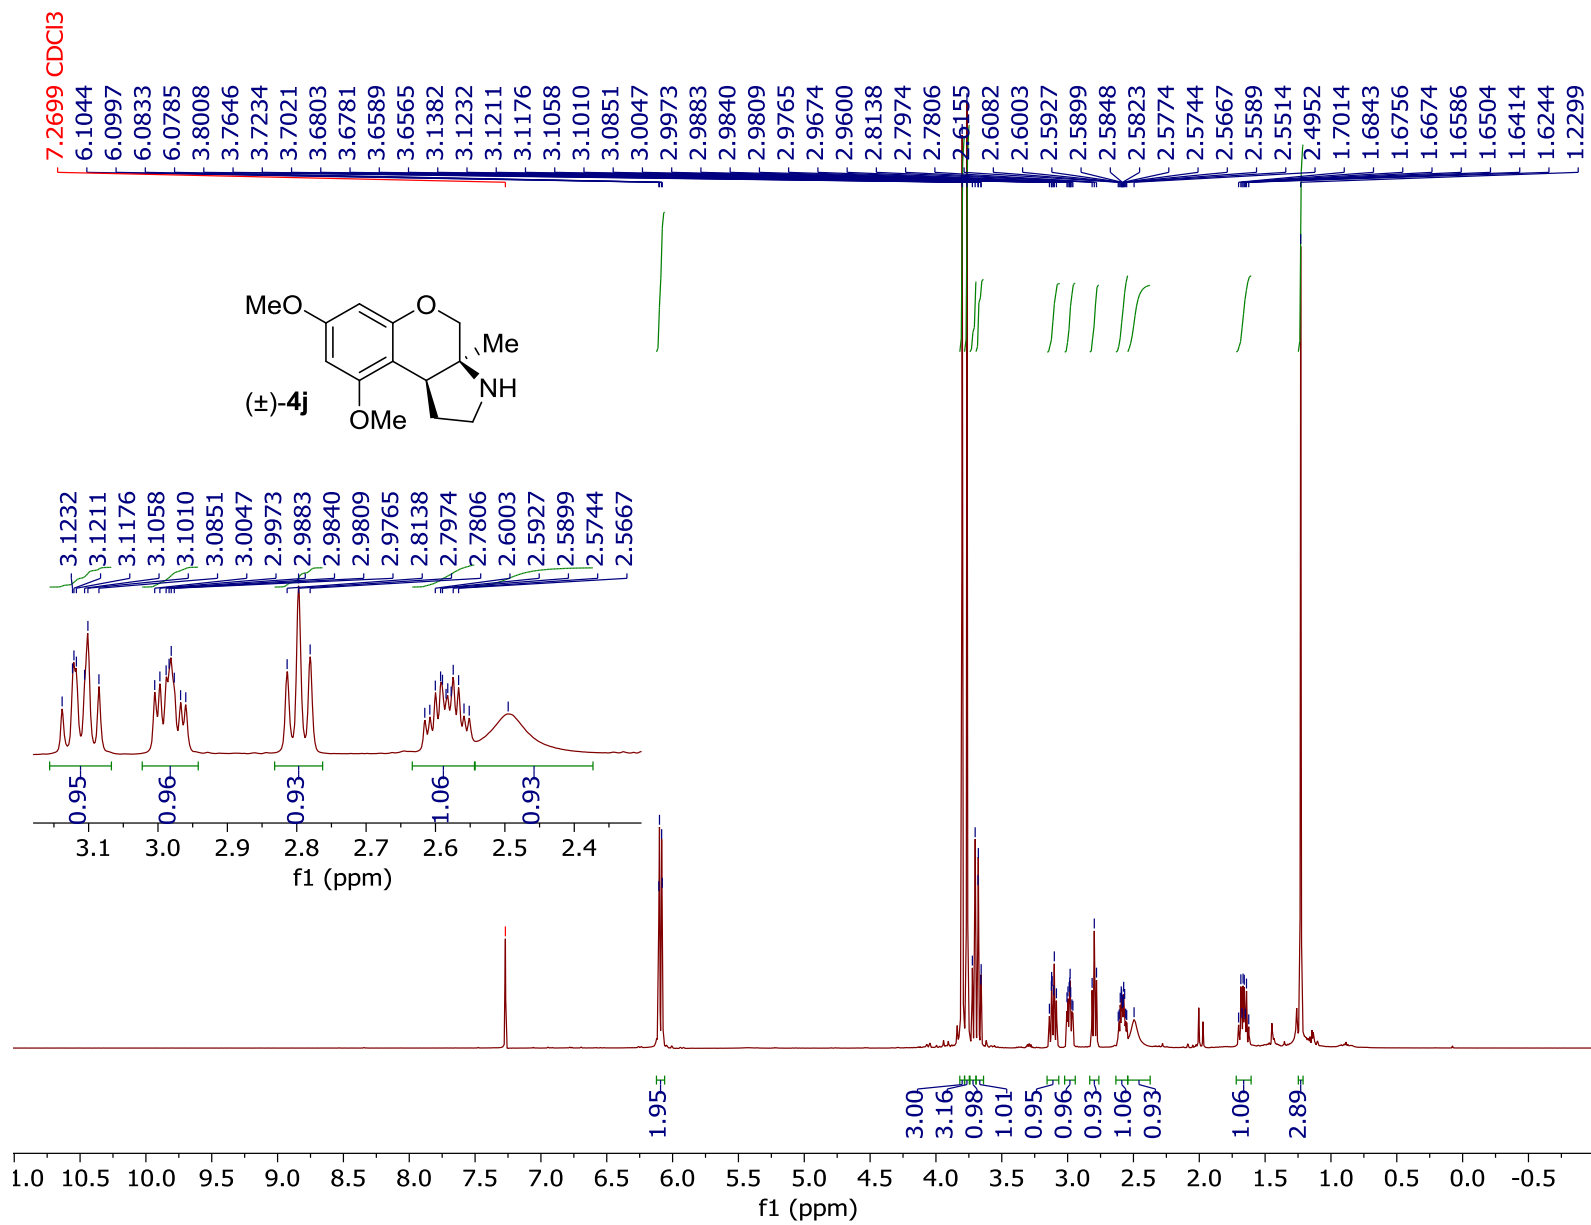



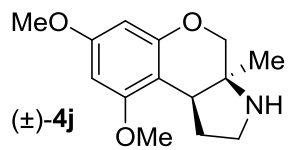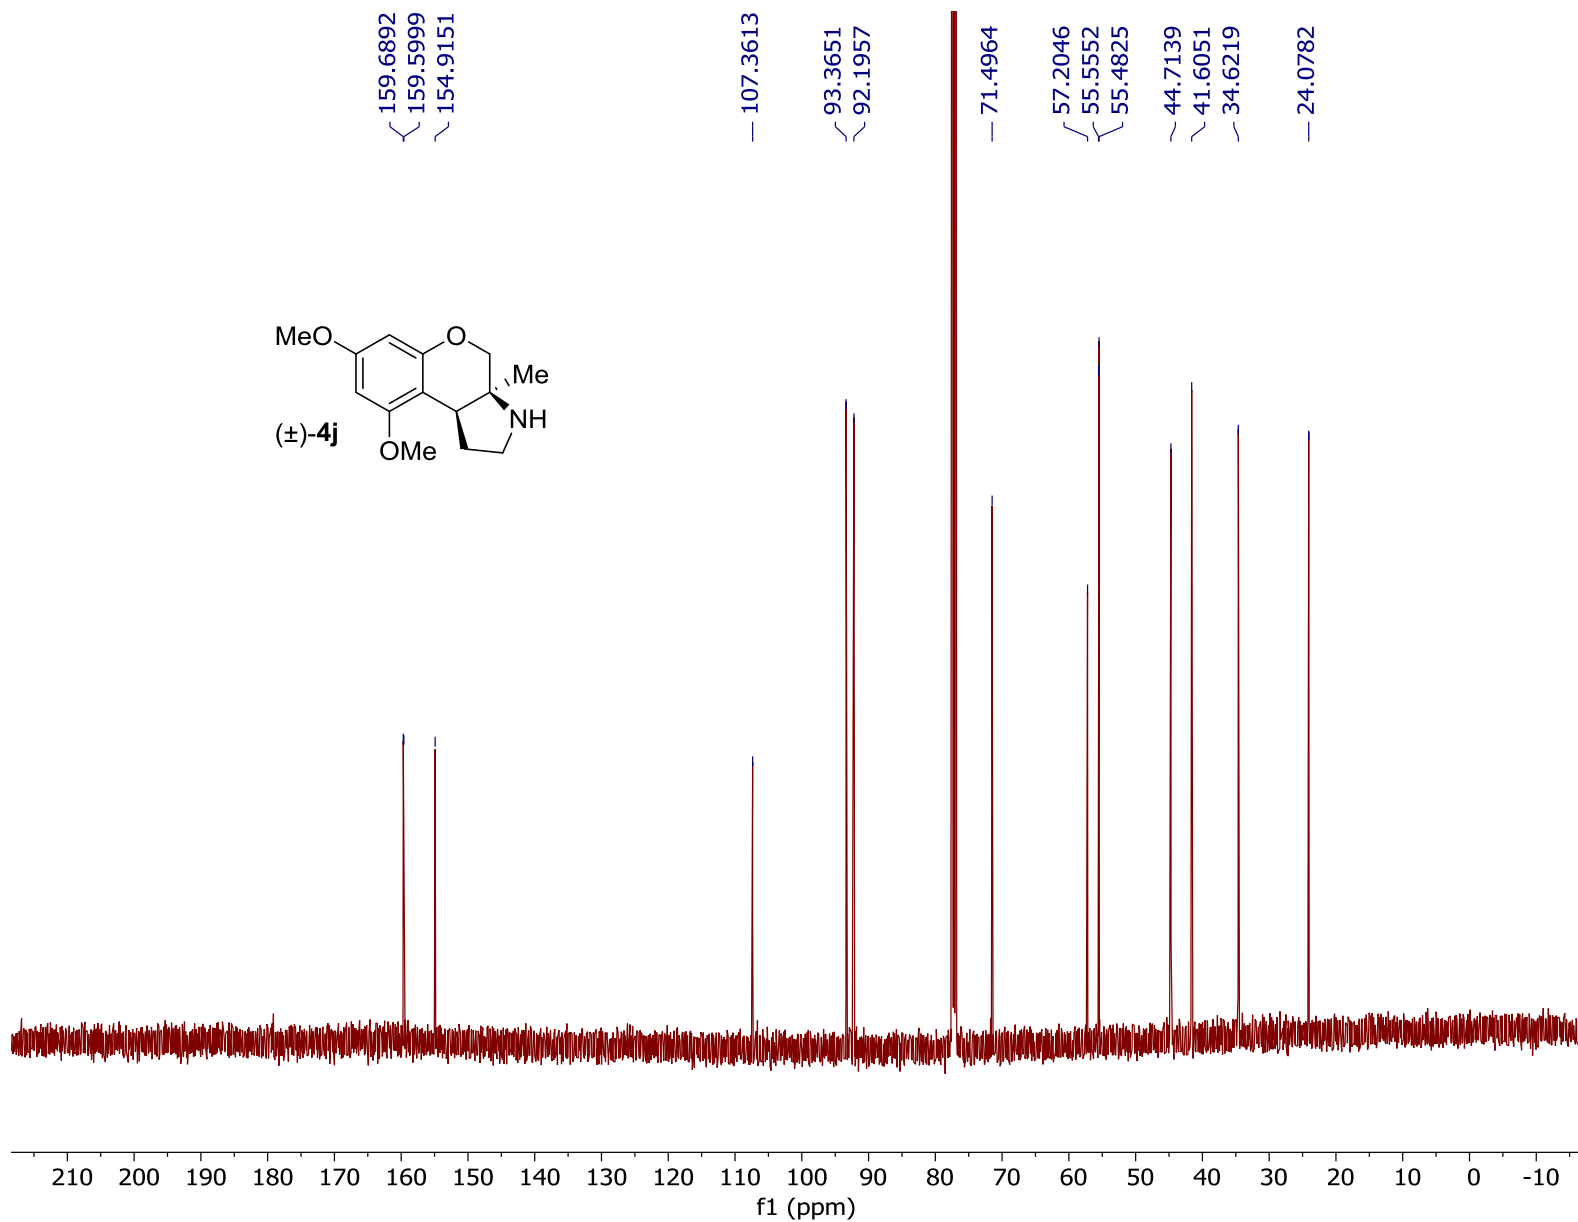

Compound **4j**, 126 MHz  $^{13}\text{C}$  NMR Spectrum in  $\text{CDCl}_3$

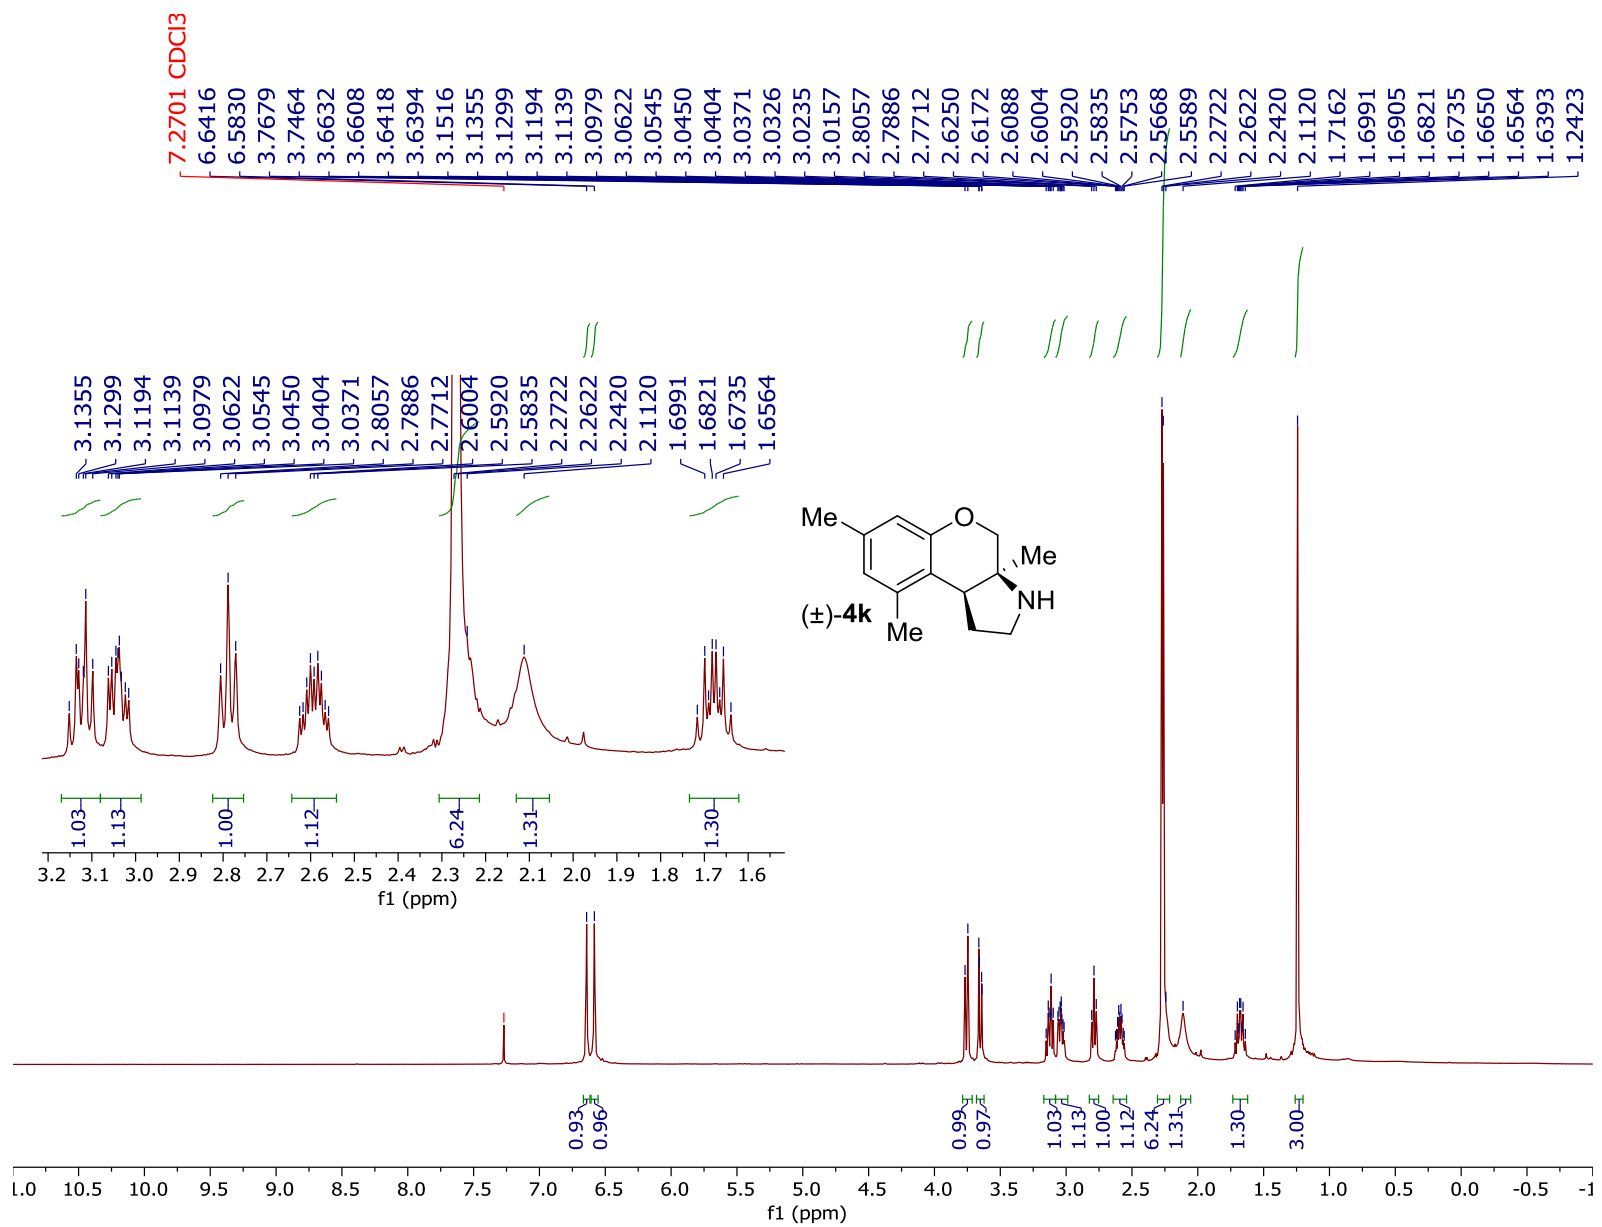

Compound 4k, 500 MHz <sup>1</sup>H NMR Spectrum in CDCl<sub>3</sub>

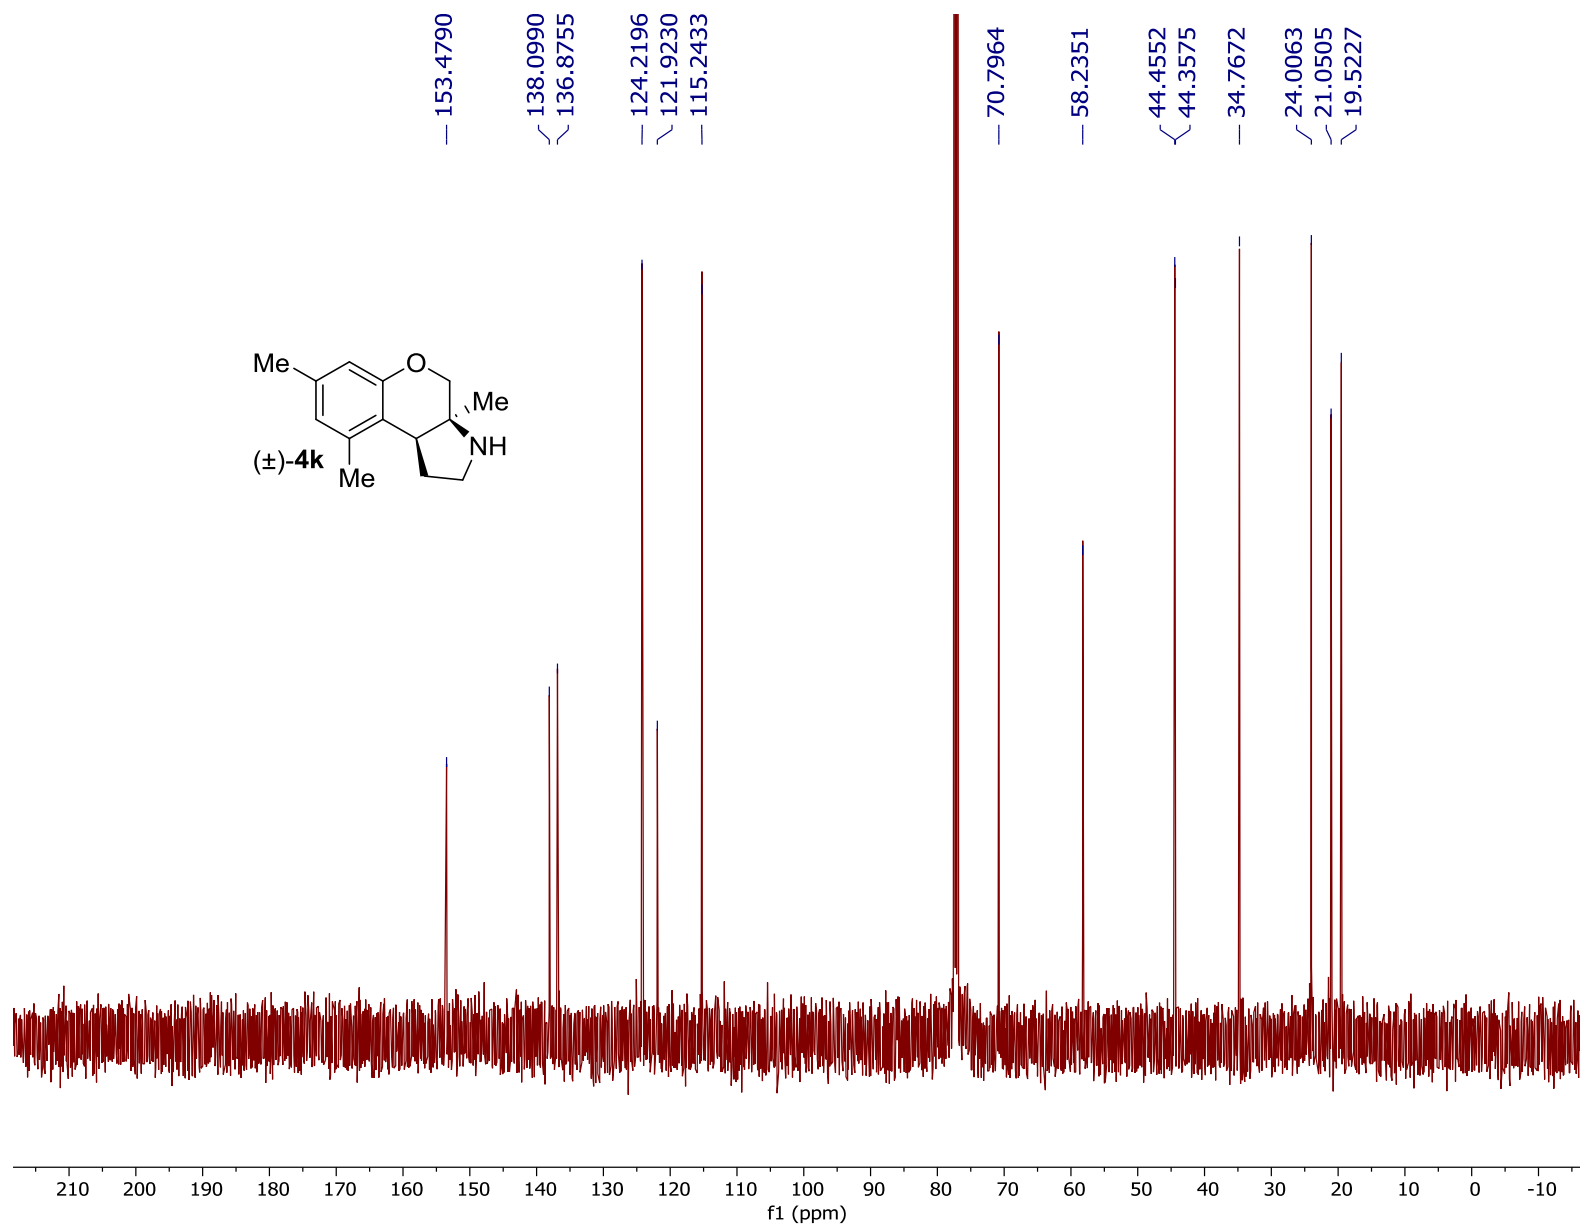

Compound 4k, 126 MHz  $^{13}\text{C}$  NMR Spectrum in  $\text{CDCl}_3$

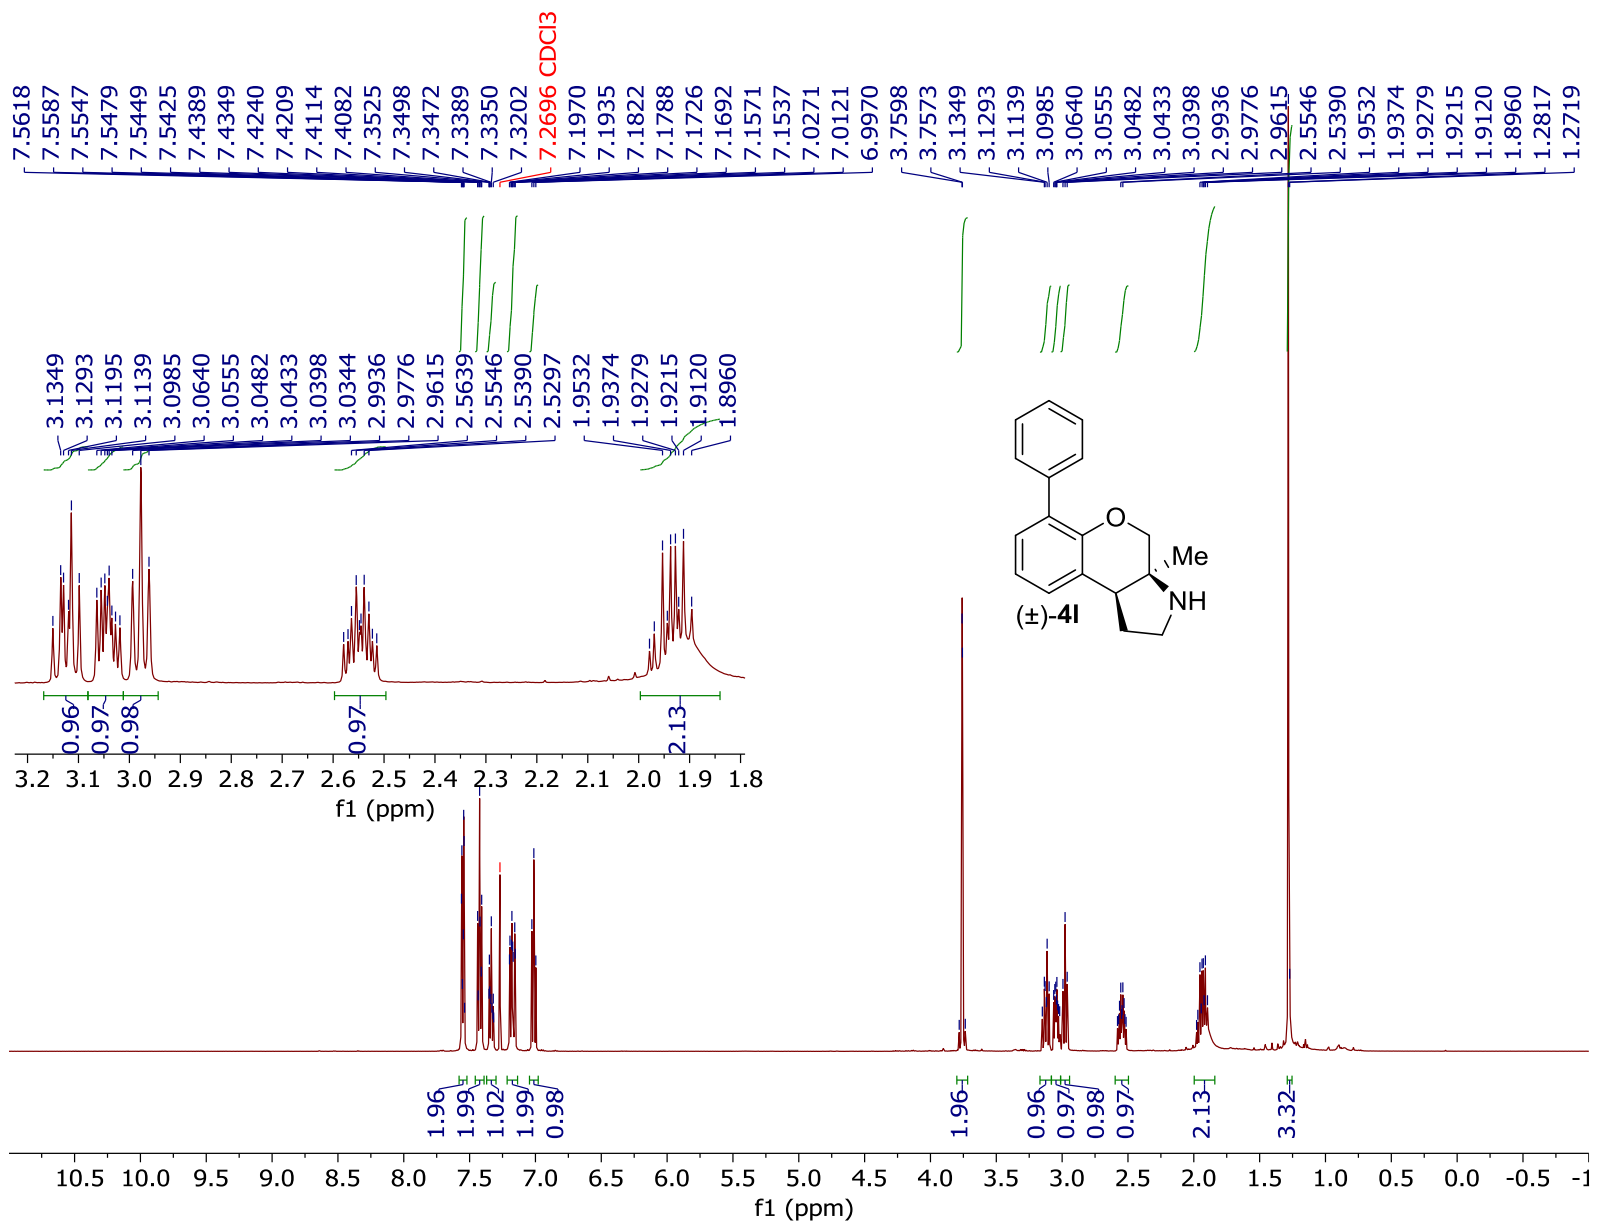

**Compound 4I, 500 MHz <sup>1</sup>H NMR Spectrum in CDCl<sub>3</sub>**

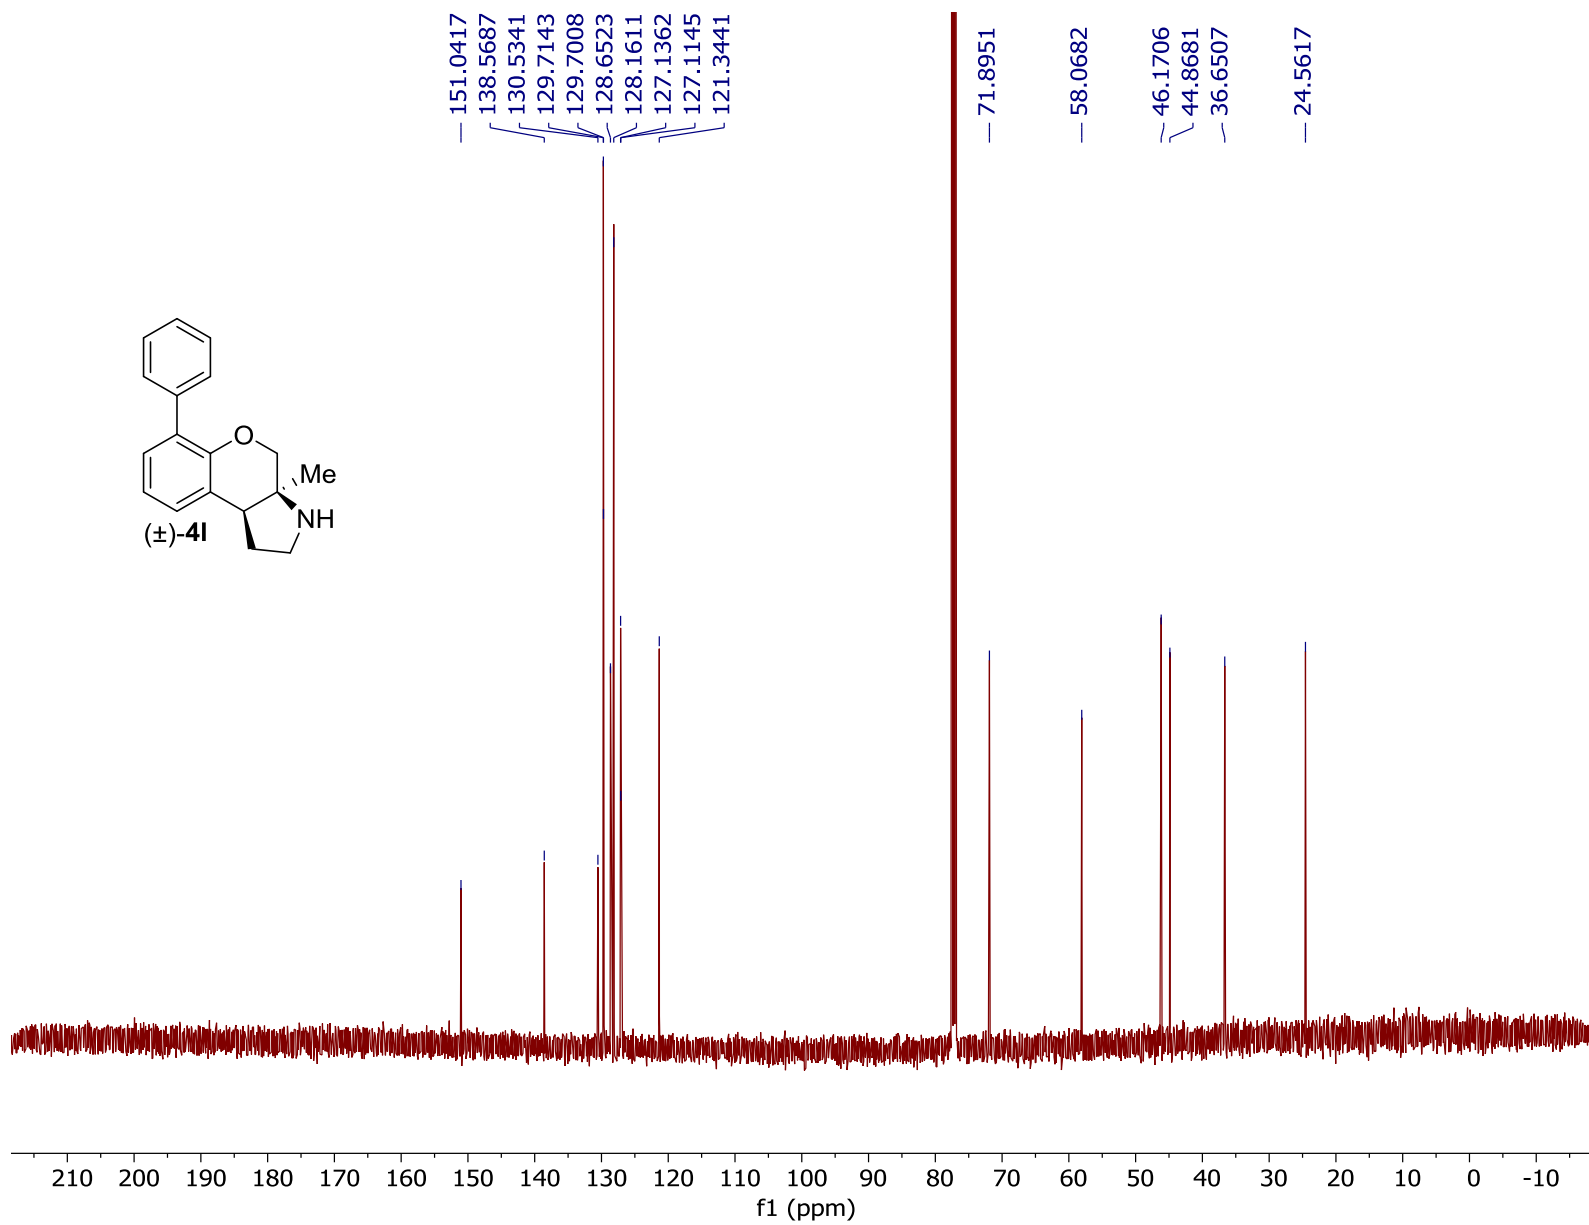

Compound 4I, 126 MHz  $^{13}\text{C}$  NMR Spectrum in  $\text{CDCl}_3$

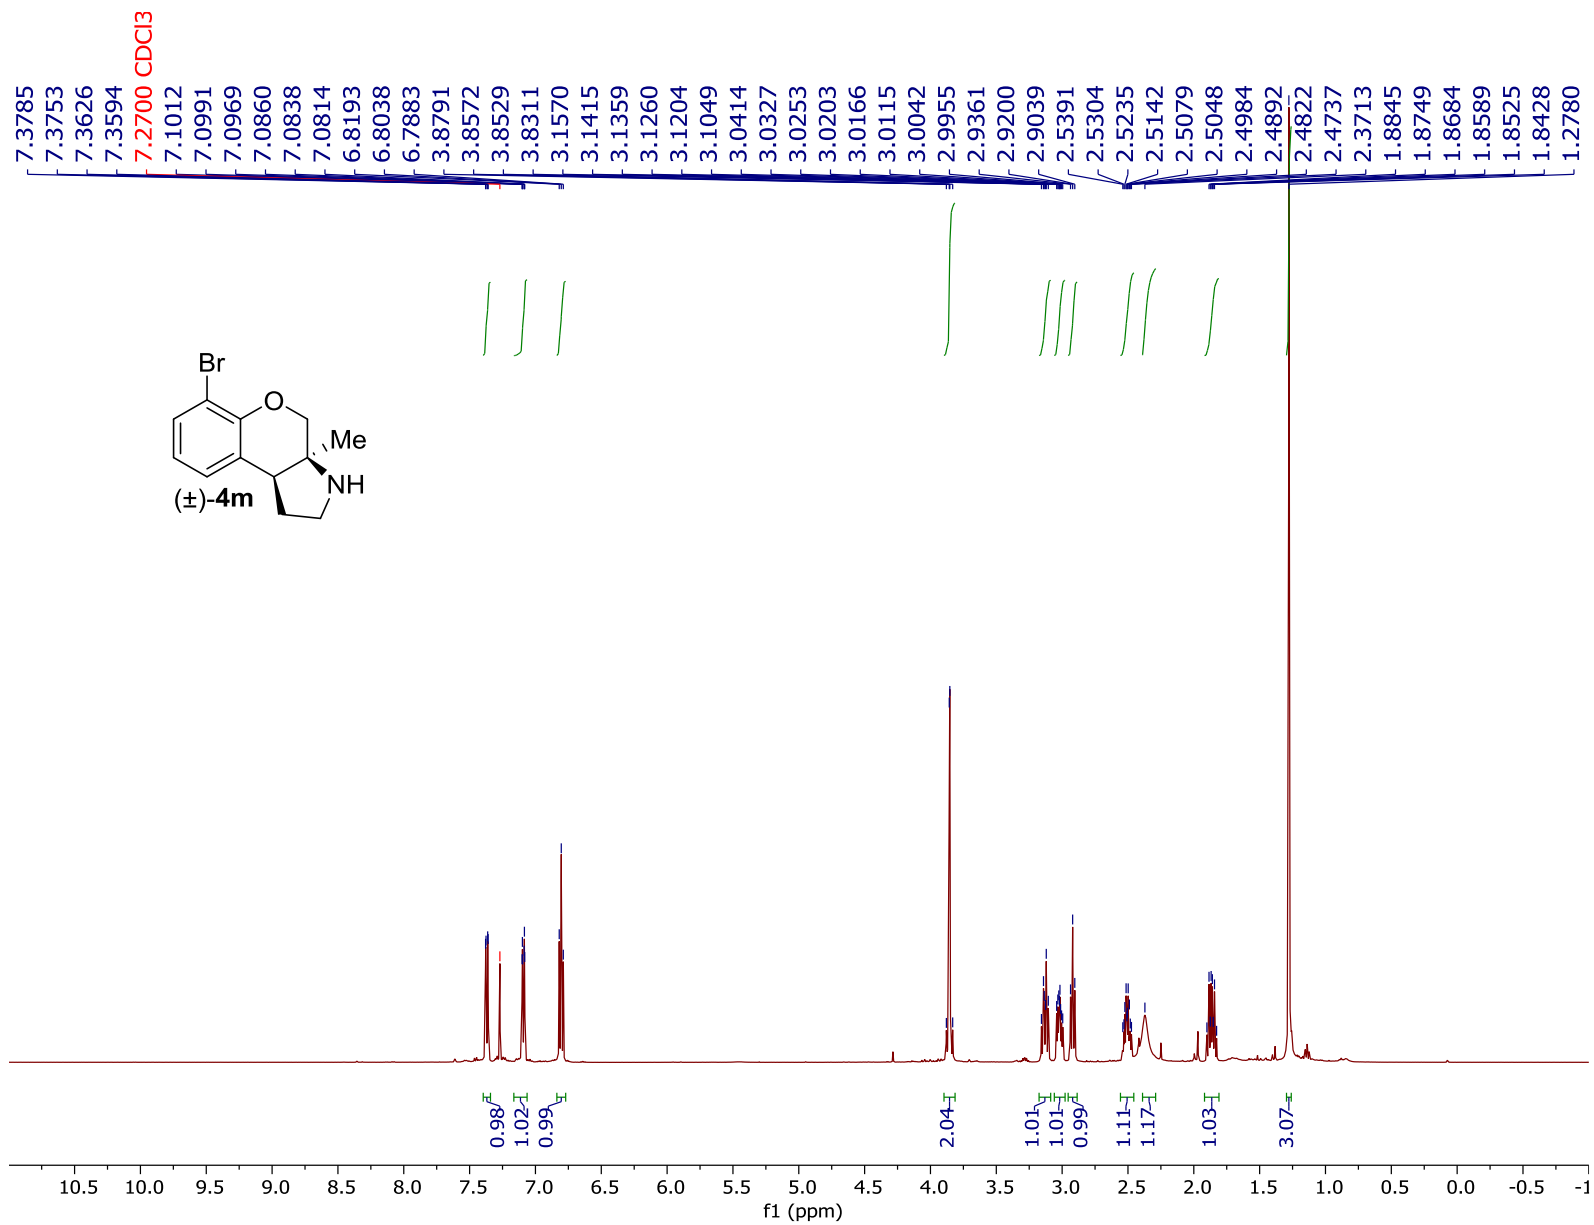

Compound 4m, 500 MHz <sup>1</sup>H NMR Spectrum in CDCl<sub>3</sub>

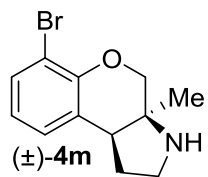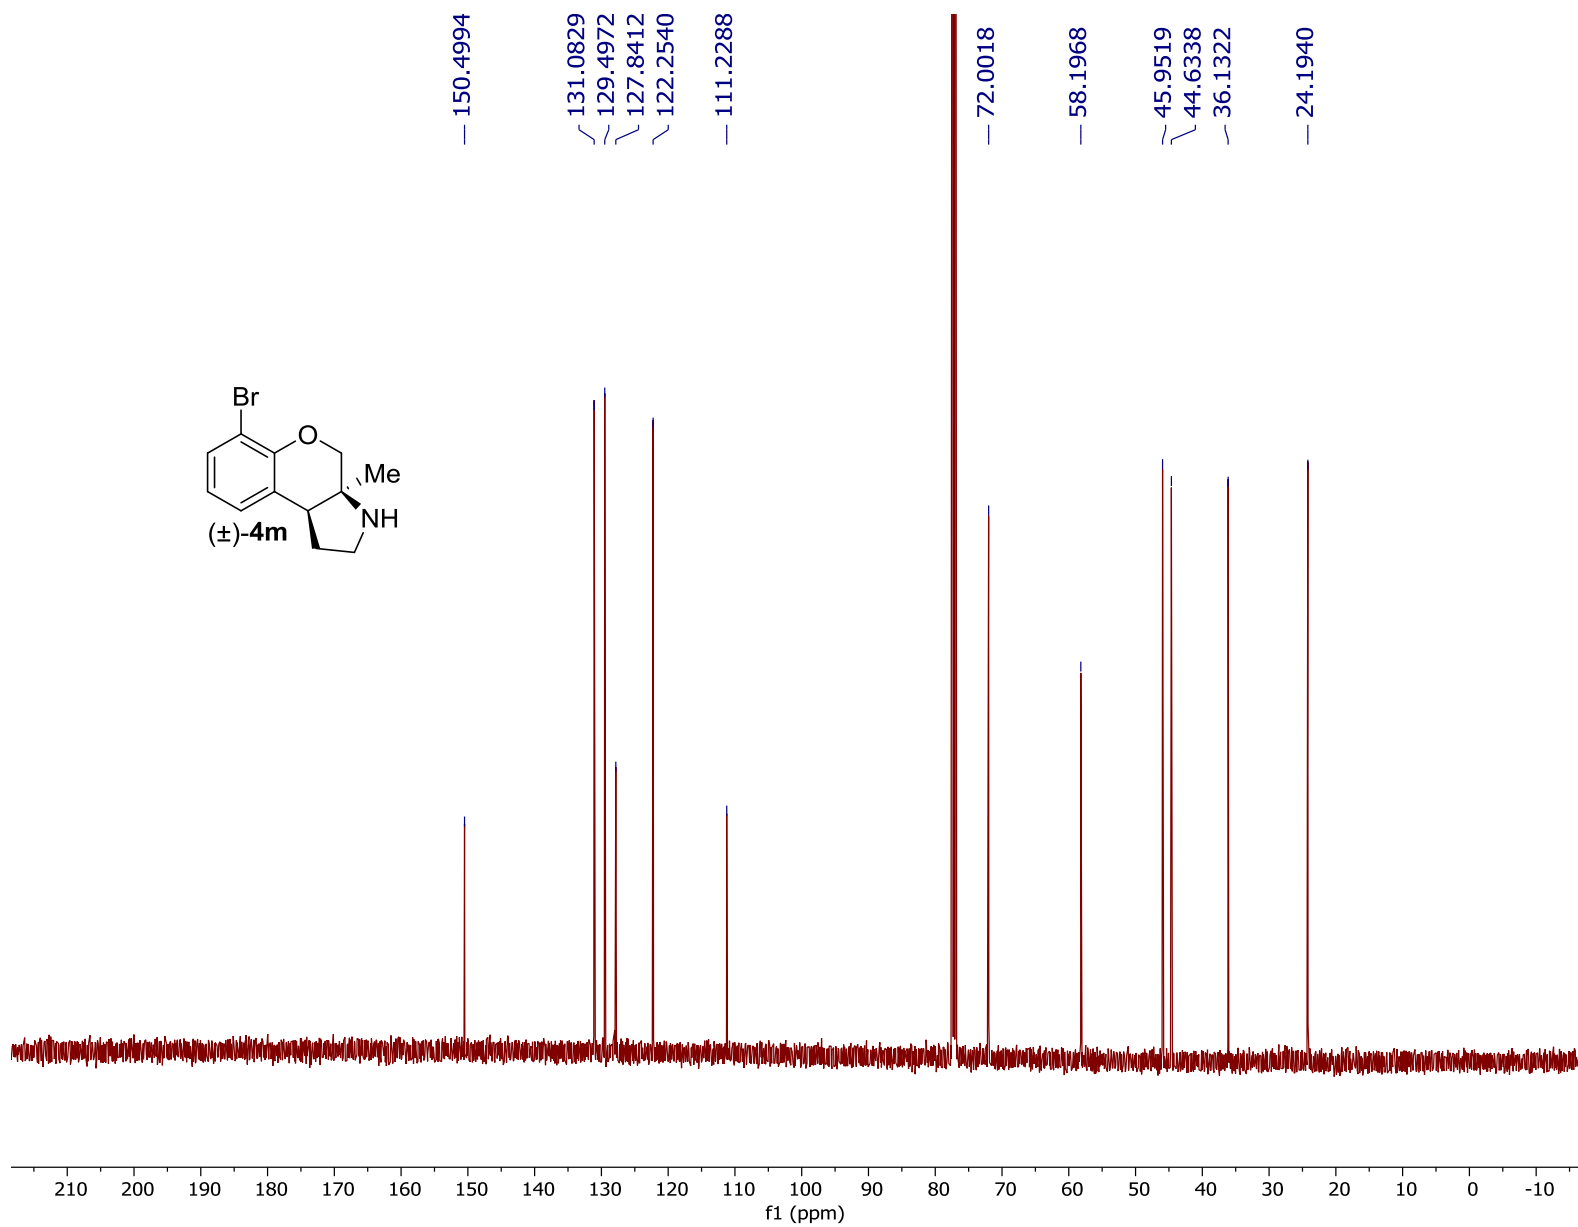

Compound **4m**, 126 MHz  $^{13}\text{C}$  NMR Spectrum in  $\text{CDCl}_3$

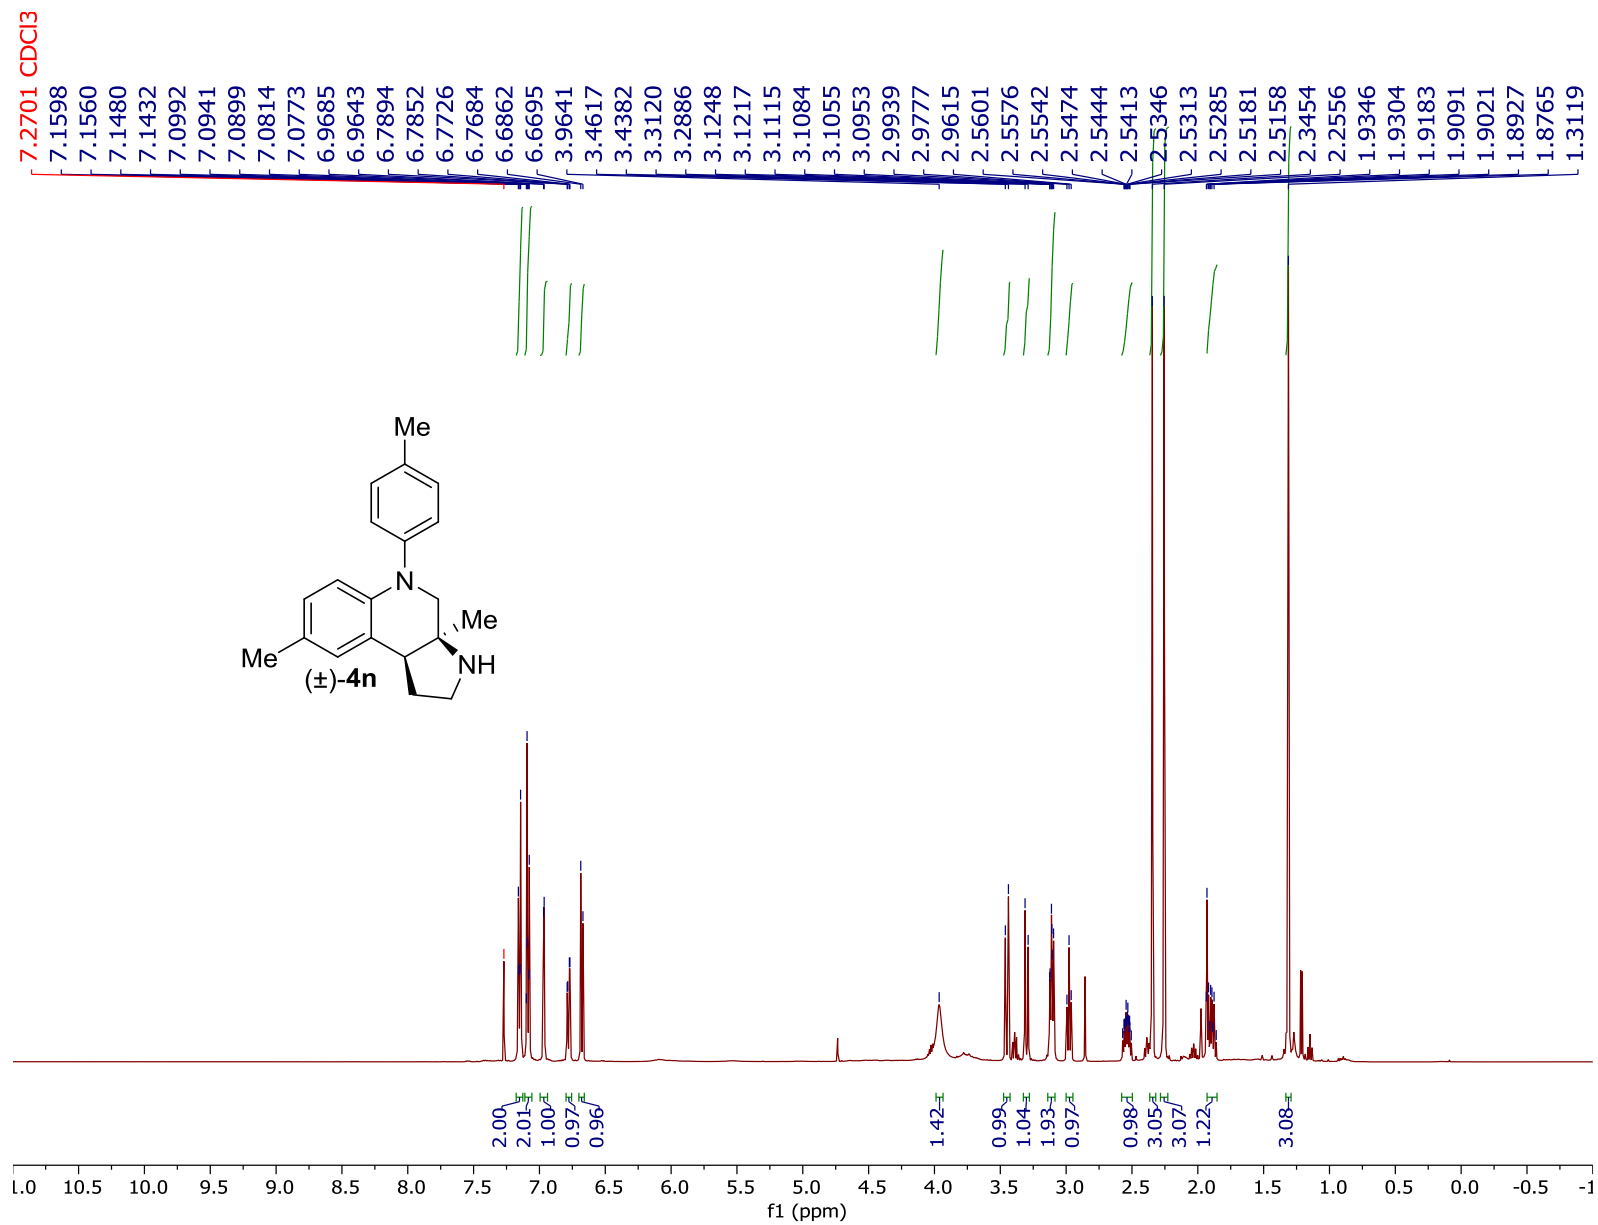

Compound 4n, 500 MHz <sup>1</sup>H NMR Spectrum in CDCl<sub>3</sub>



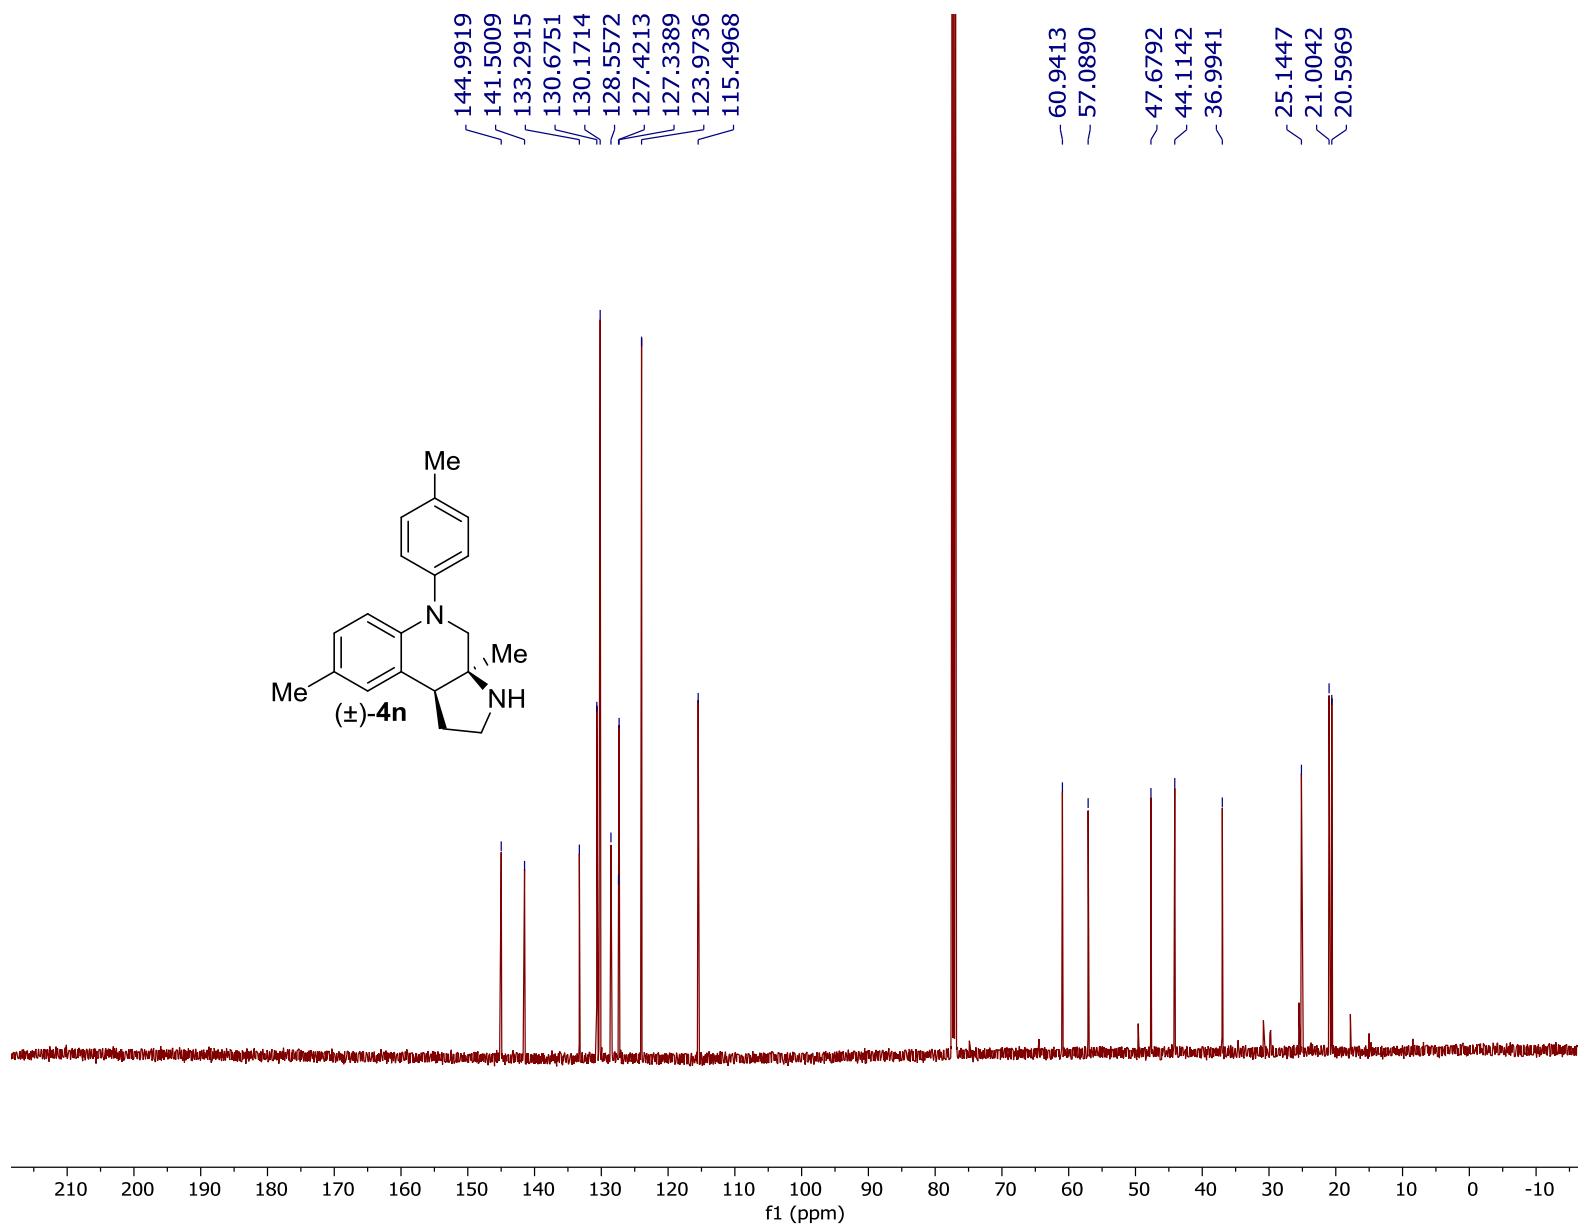

Compound 4n, 126 MHz <sup>13</sup>C NMR Spectrum in CDCl<sub>3</sub>

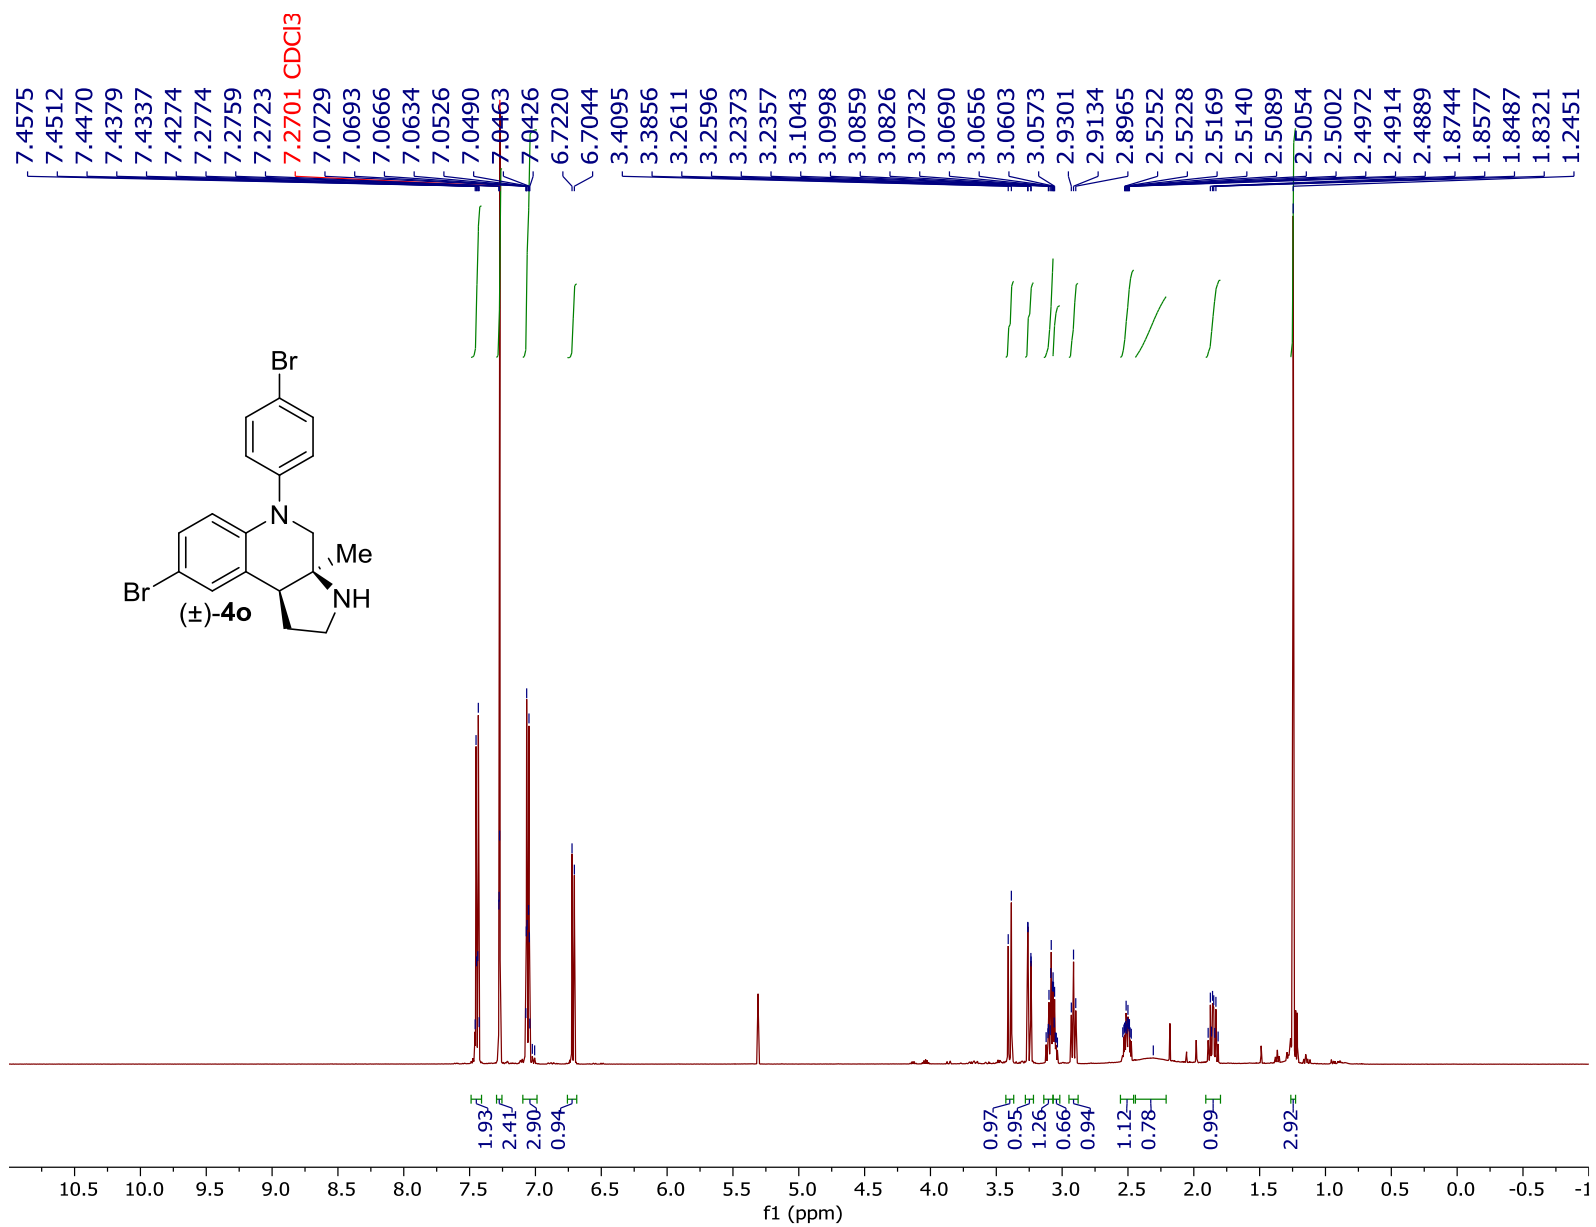

Compound 4o, 500 MHz <sup>1</sup>H NMR Spectrum in CDCl<sub>3</sub>

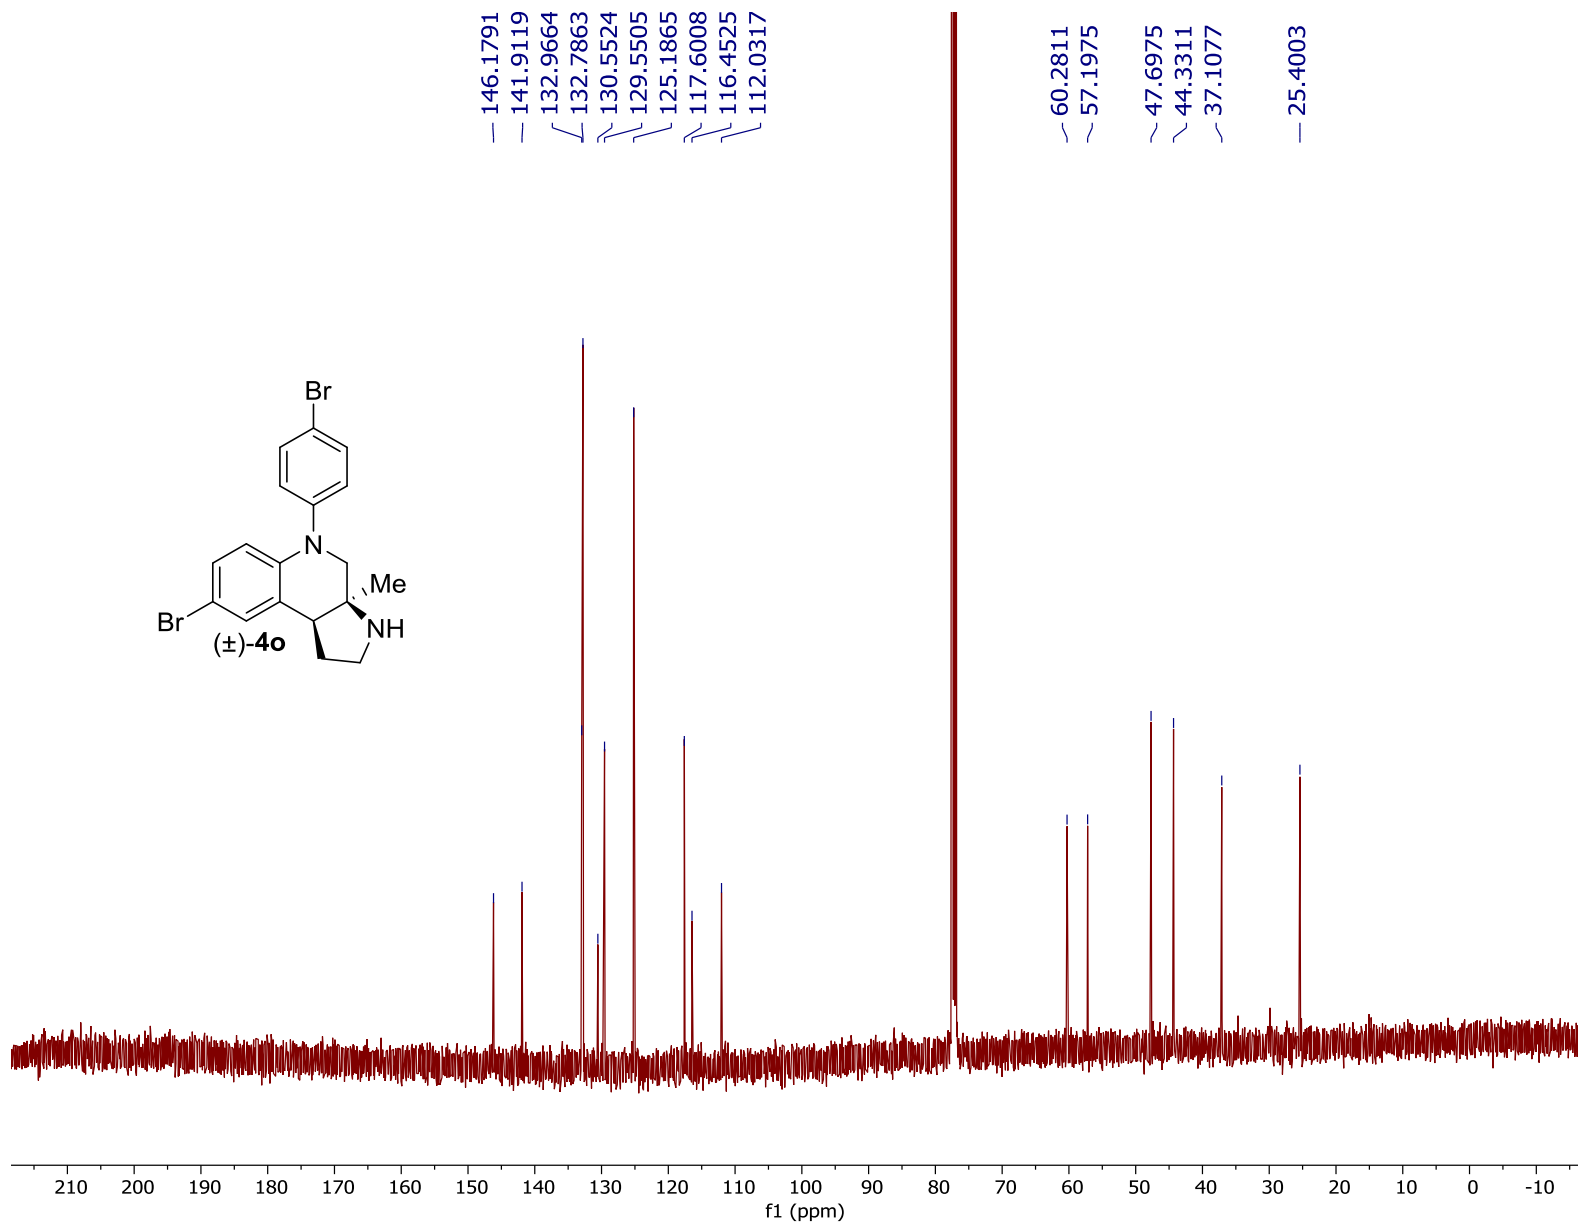

Compound 4o, 126 MHz  $^{13}\text{C}$  NMR Spectrum in  $\text{CDCl}_3$

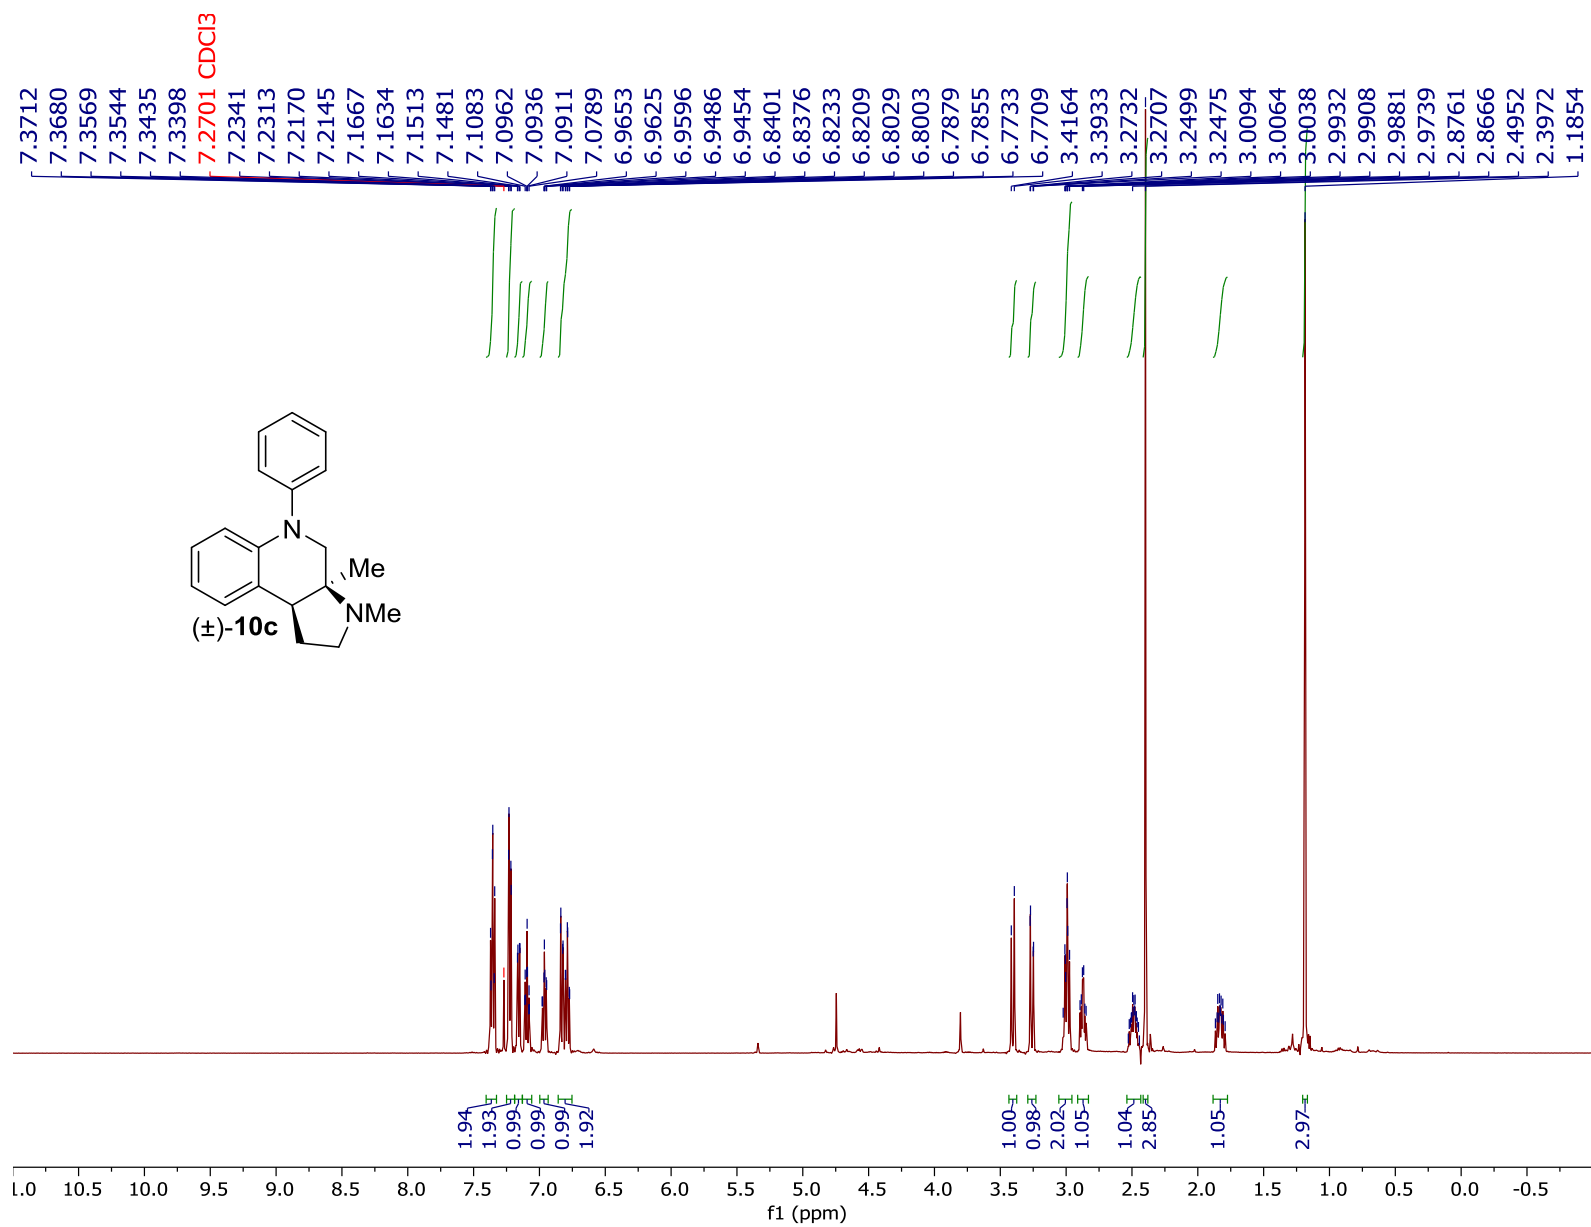

Compound 10c, 500 MHz <sup>1</sup>H NMR Spectrum in CDCl<sub>3</sub>

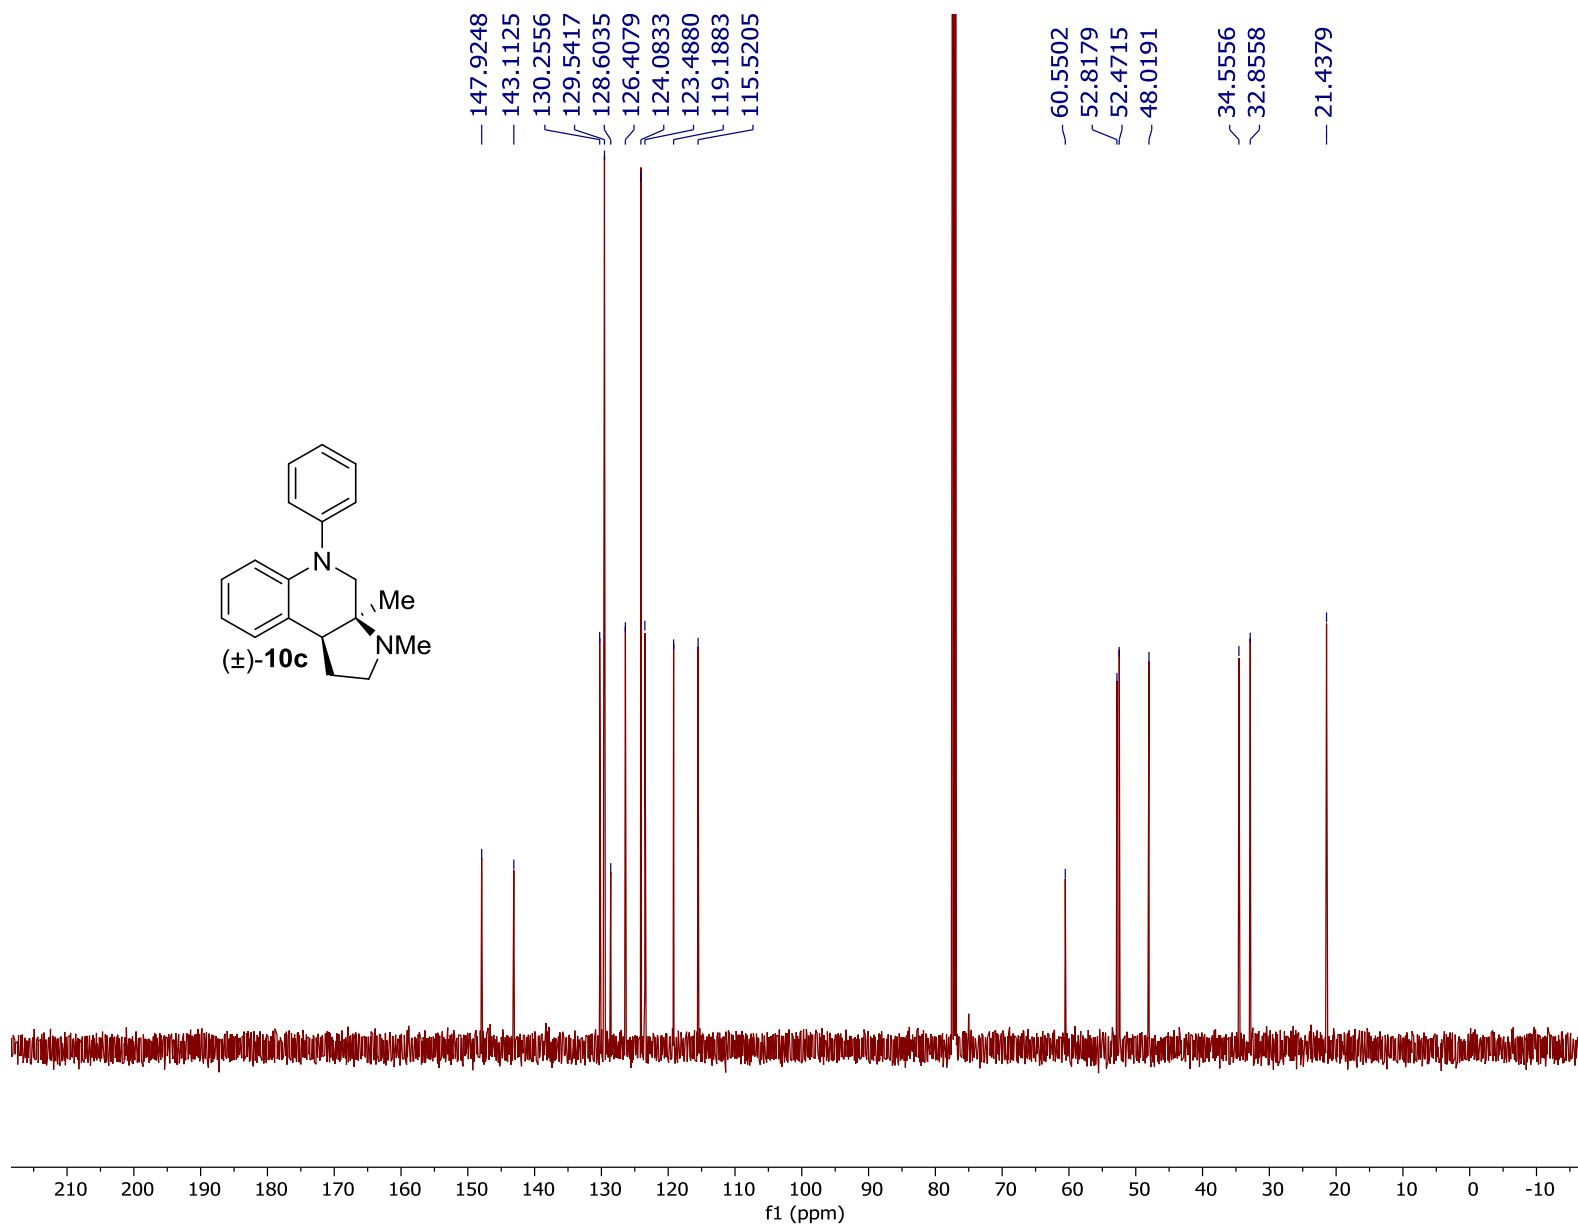

Compound 10c, 126 MHz <sup>13</sup>C NMR Spectrum in CDCl<sub>3</sub>

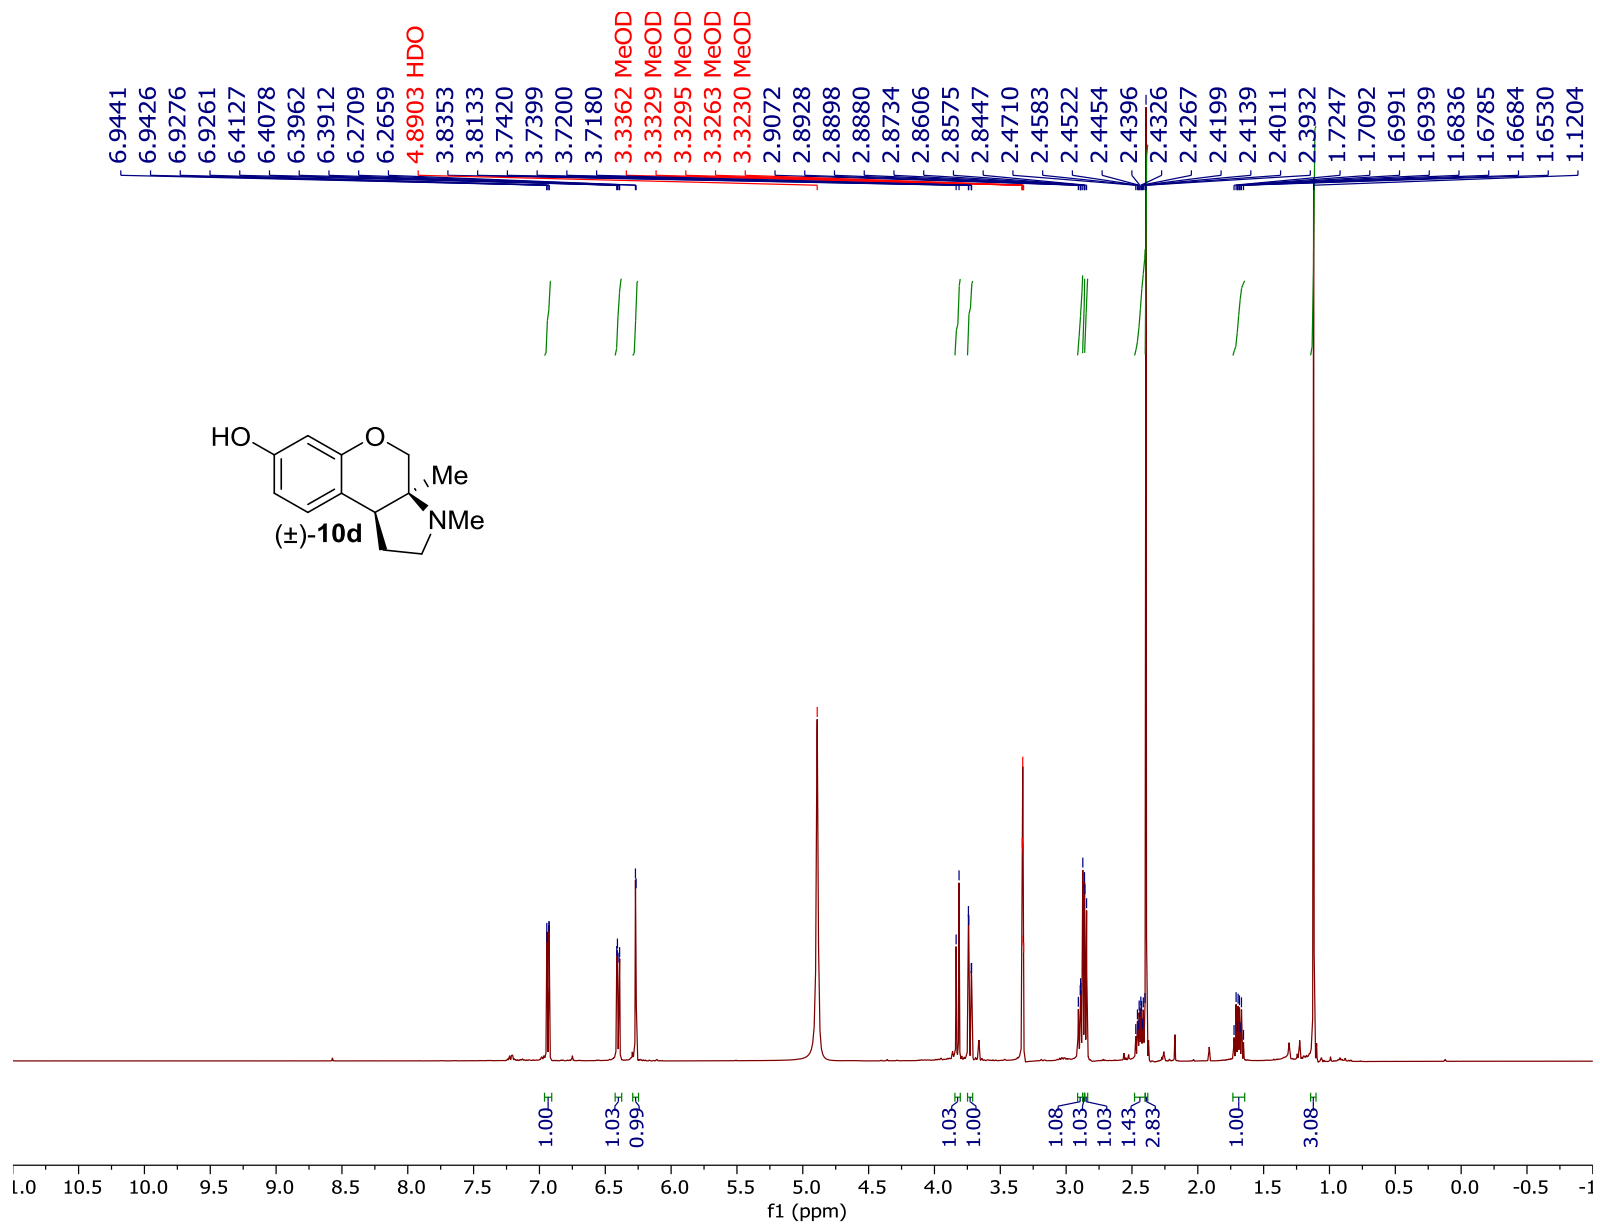

Compound 10d, 500 MHz <sup>1</sup>H NMR Spectrum in CD<sub>3</sub>OD

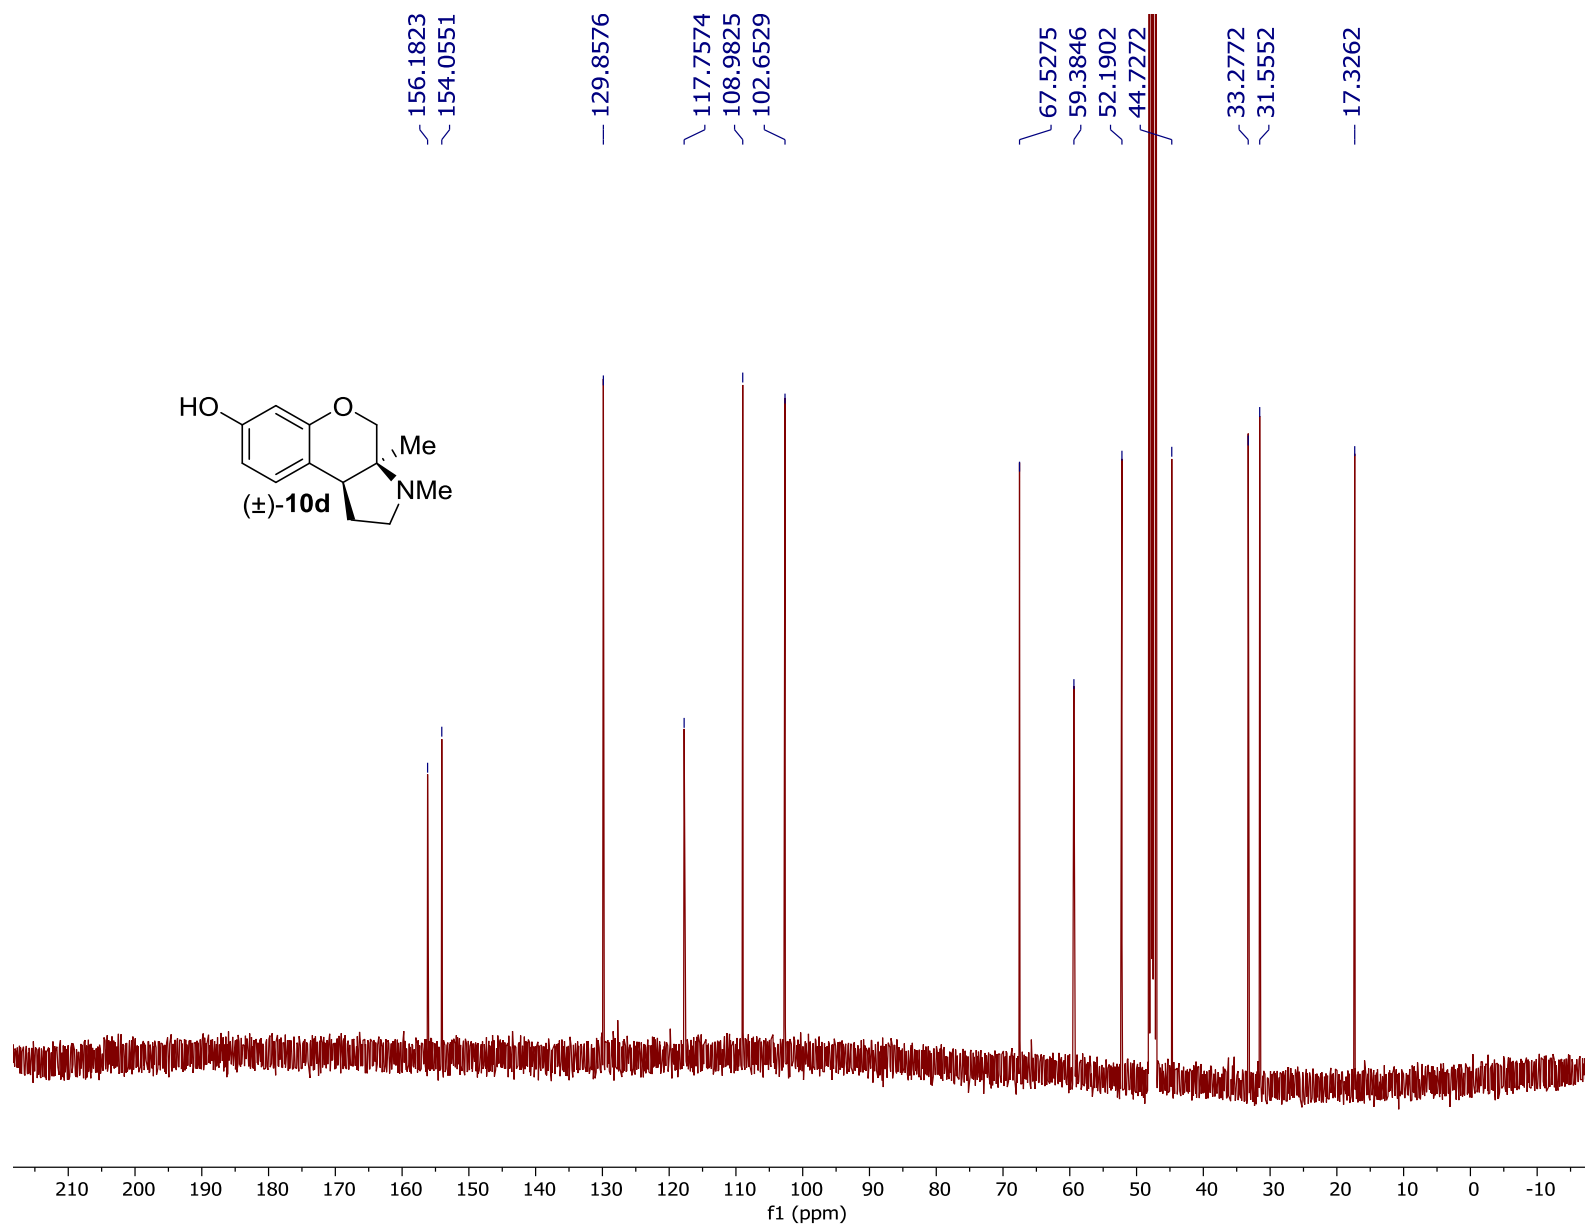

Compound 10d, 126 MHz  $^{13}\text{C}$  NMR Spectrum in  $\text{CD}_3\text{OD}$

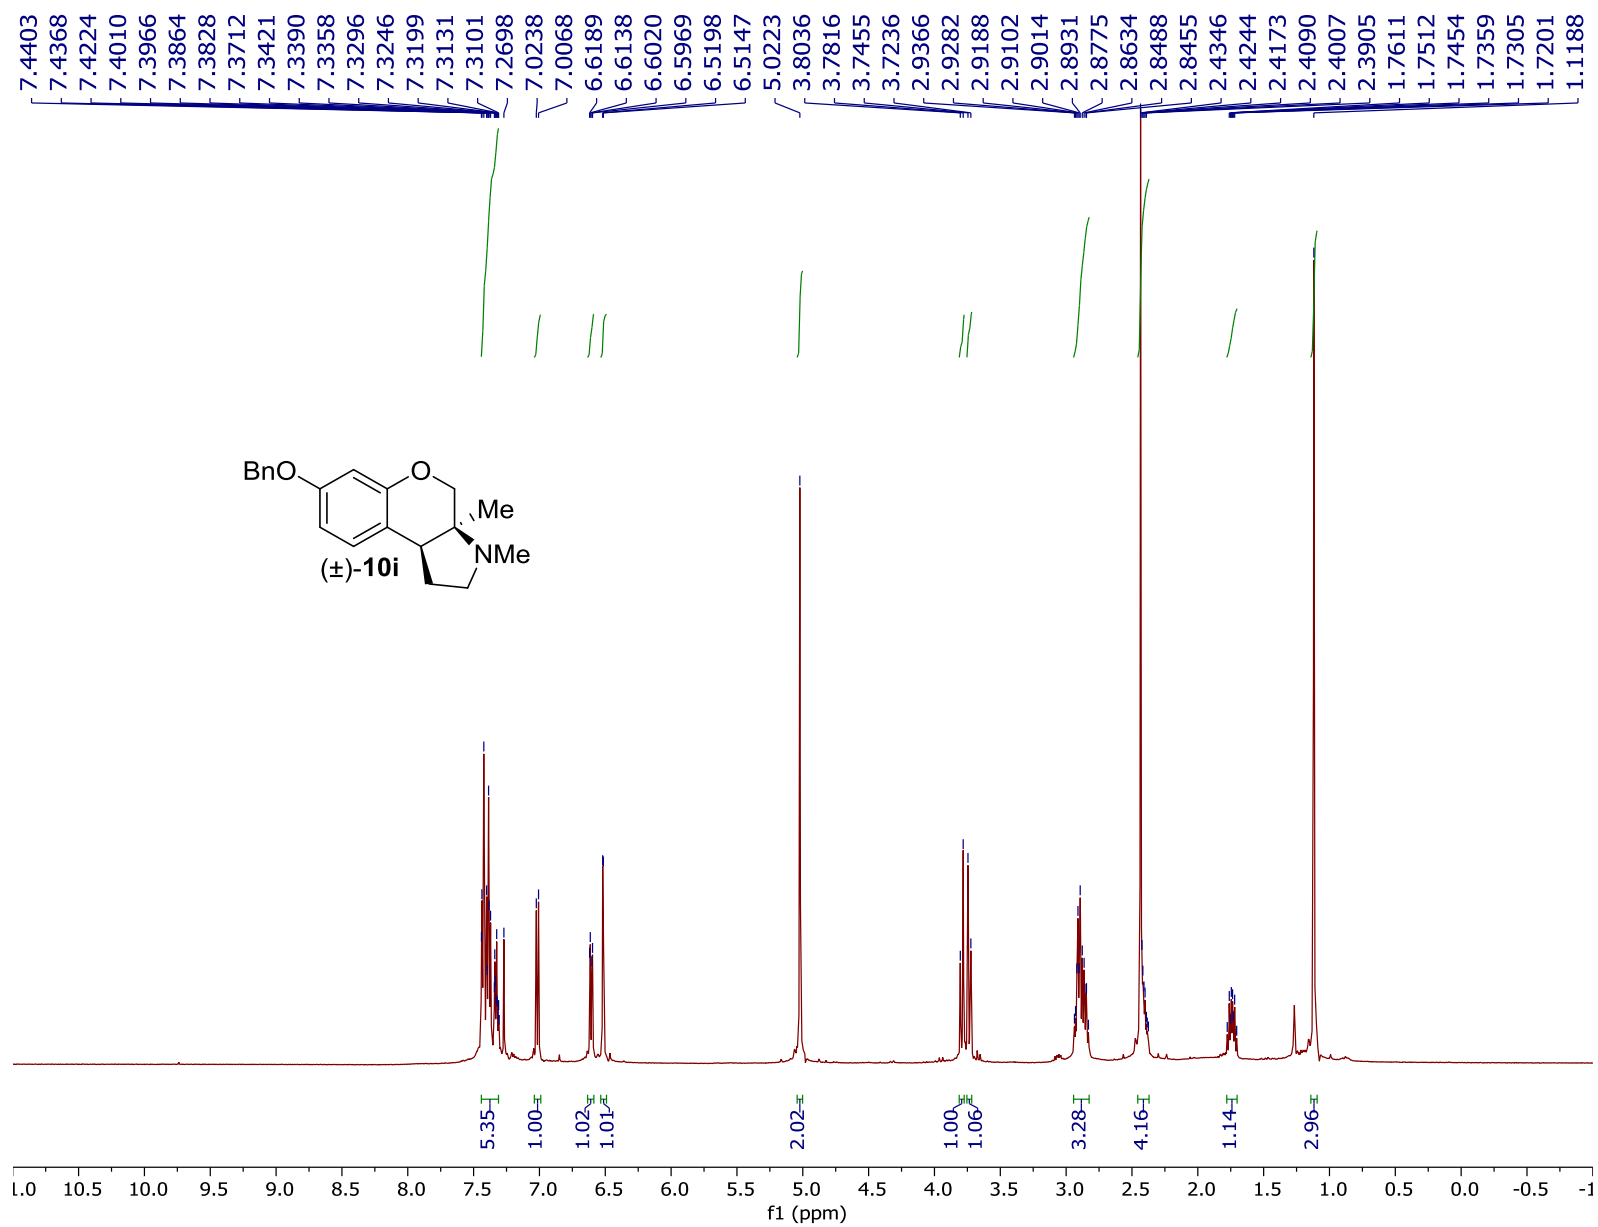

Compound 10i, 500 MHz <sup>1</sup>H NMR Spectrum in CDCl<sub>3</sub>



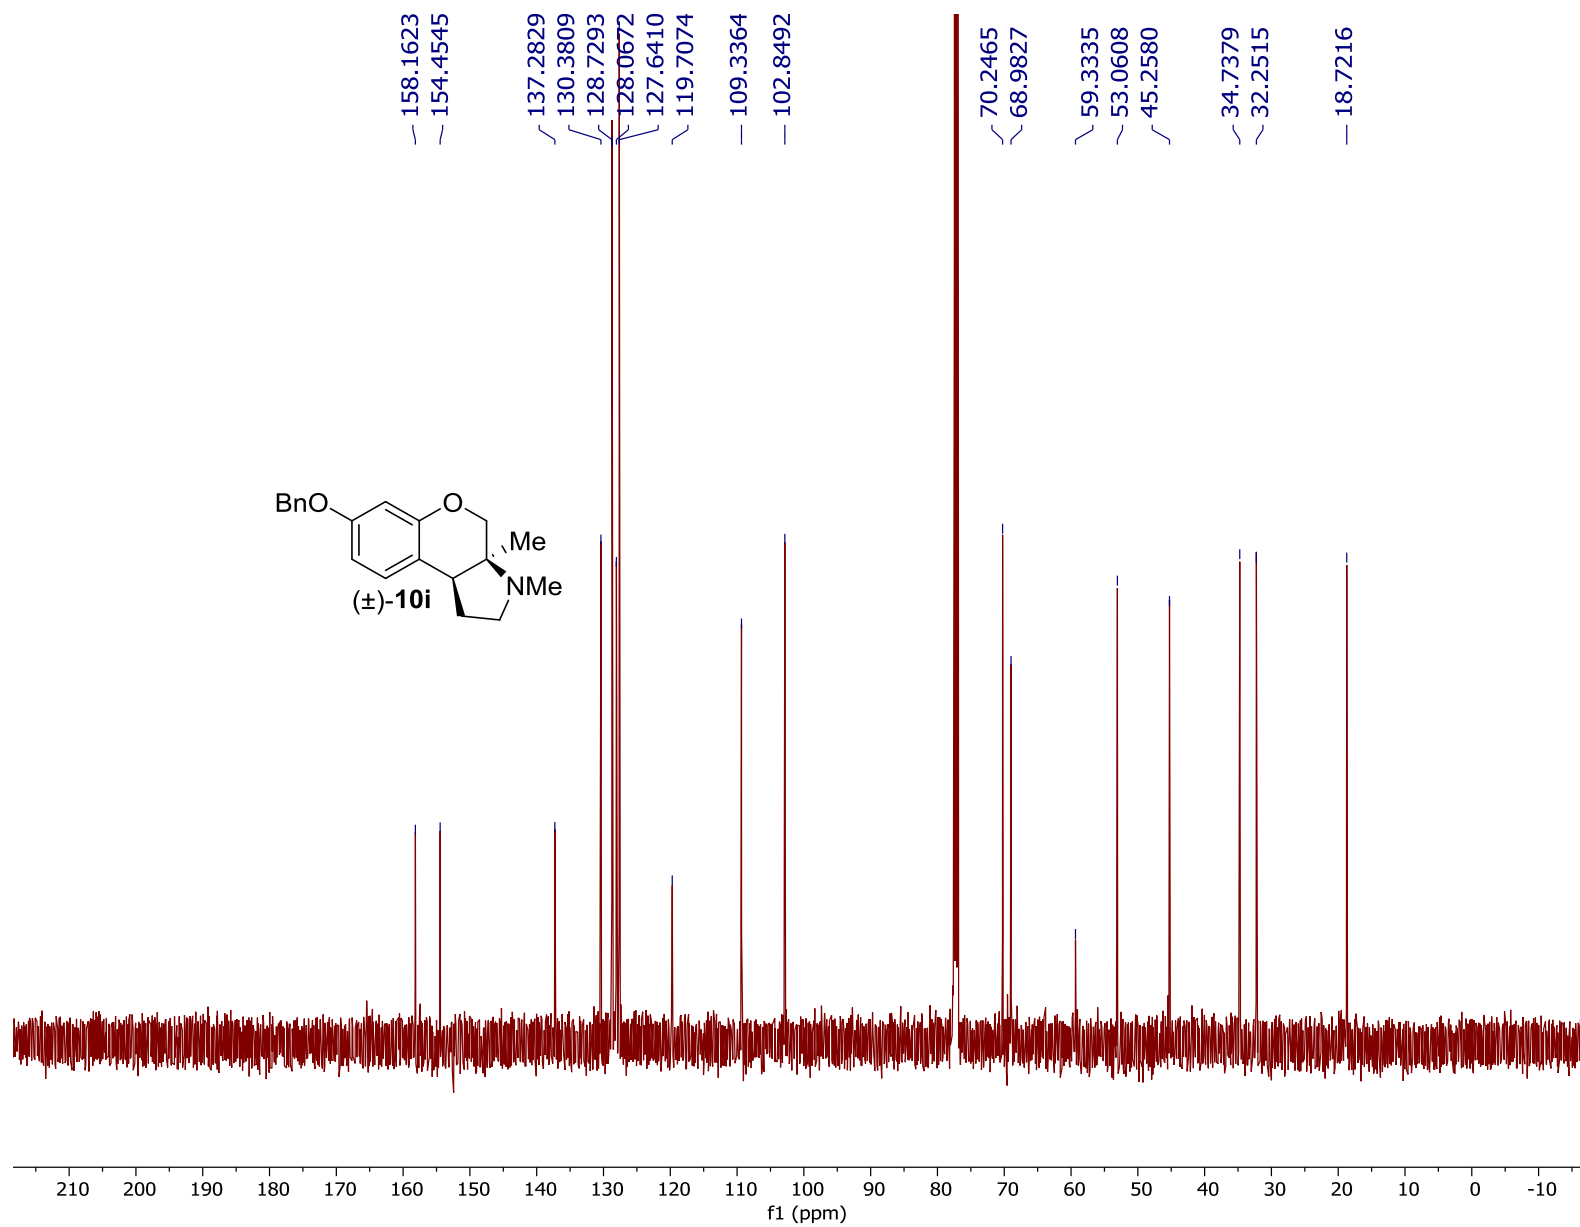

Compound 10i, 126 MHz  $^{13}\text{C}$  NMR Spectrum in  $\text{CDCl}_3$

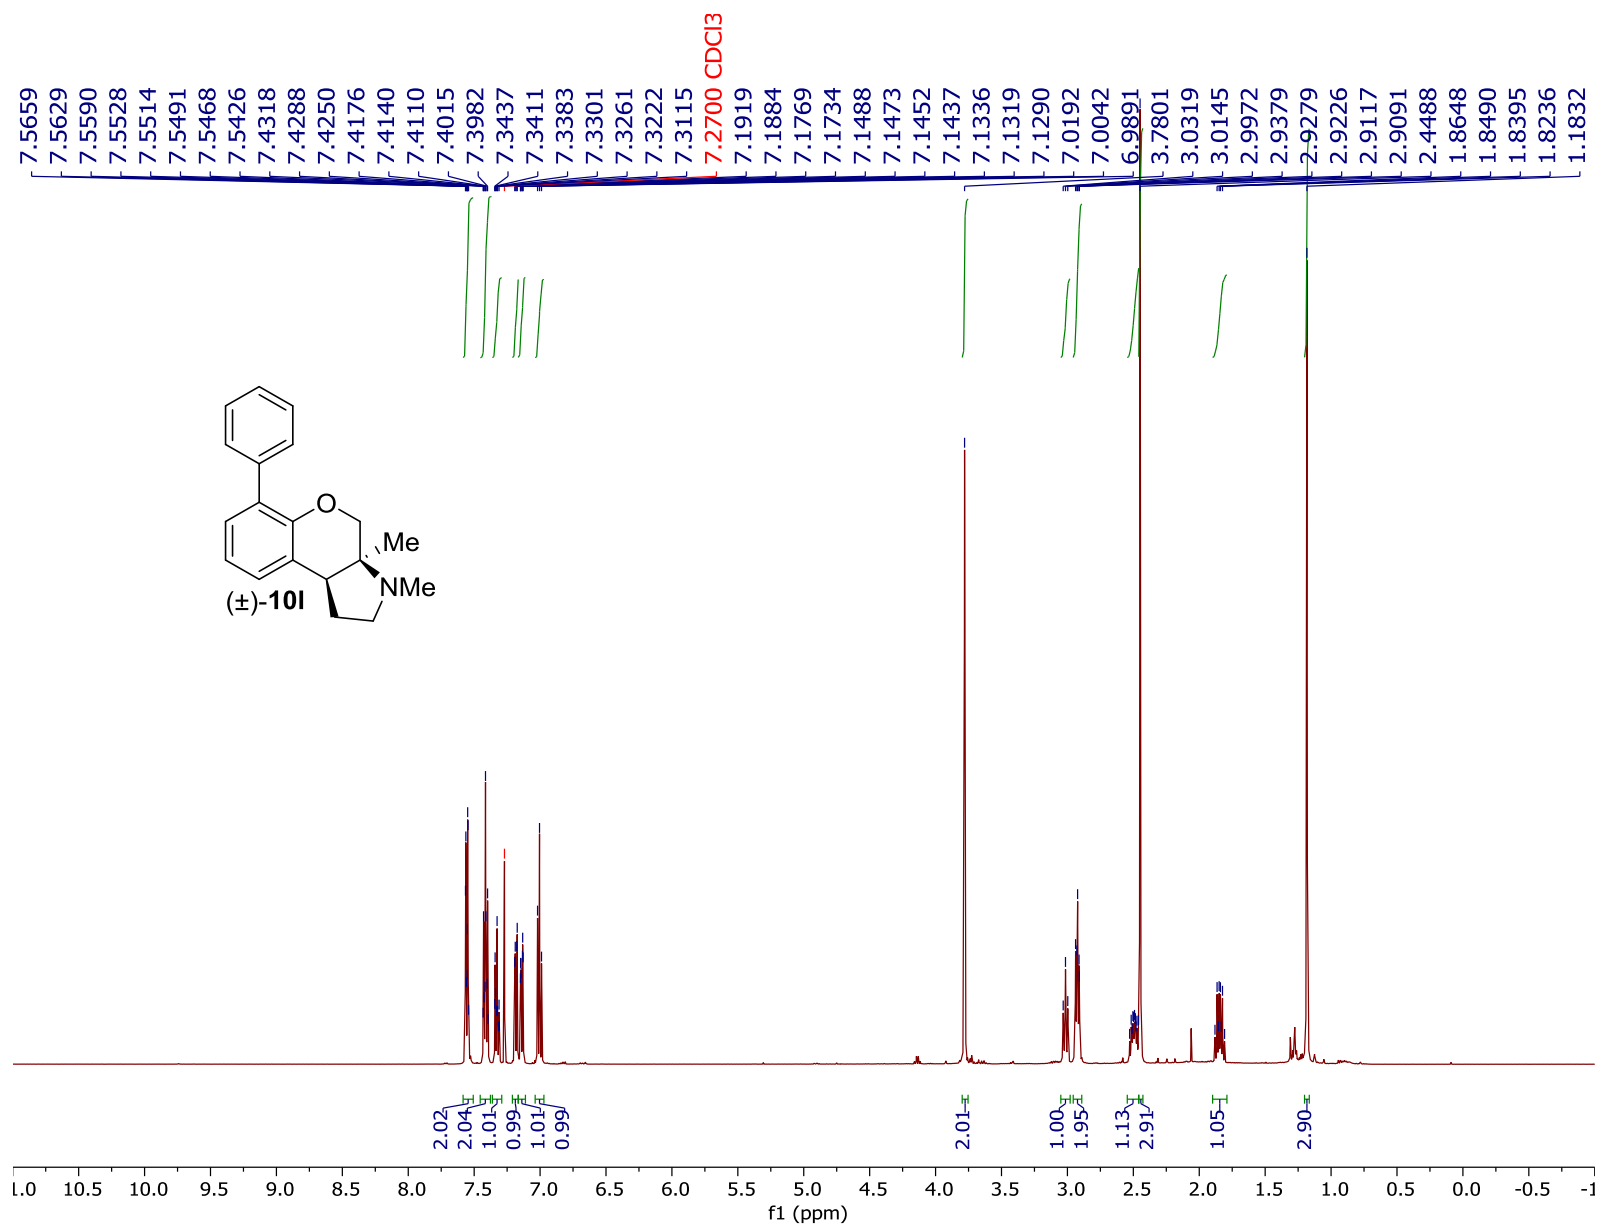

**Compound 101, 500 MHz <sup>1</sup>H NMR Spectrum in CDCl<sub>3</sub>**

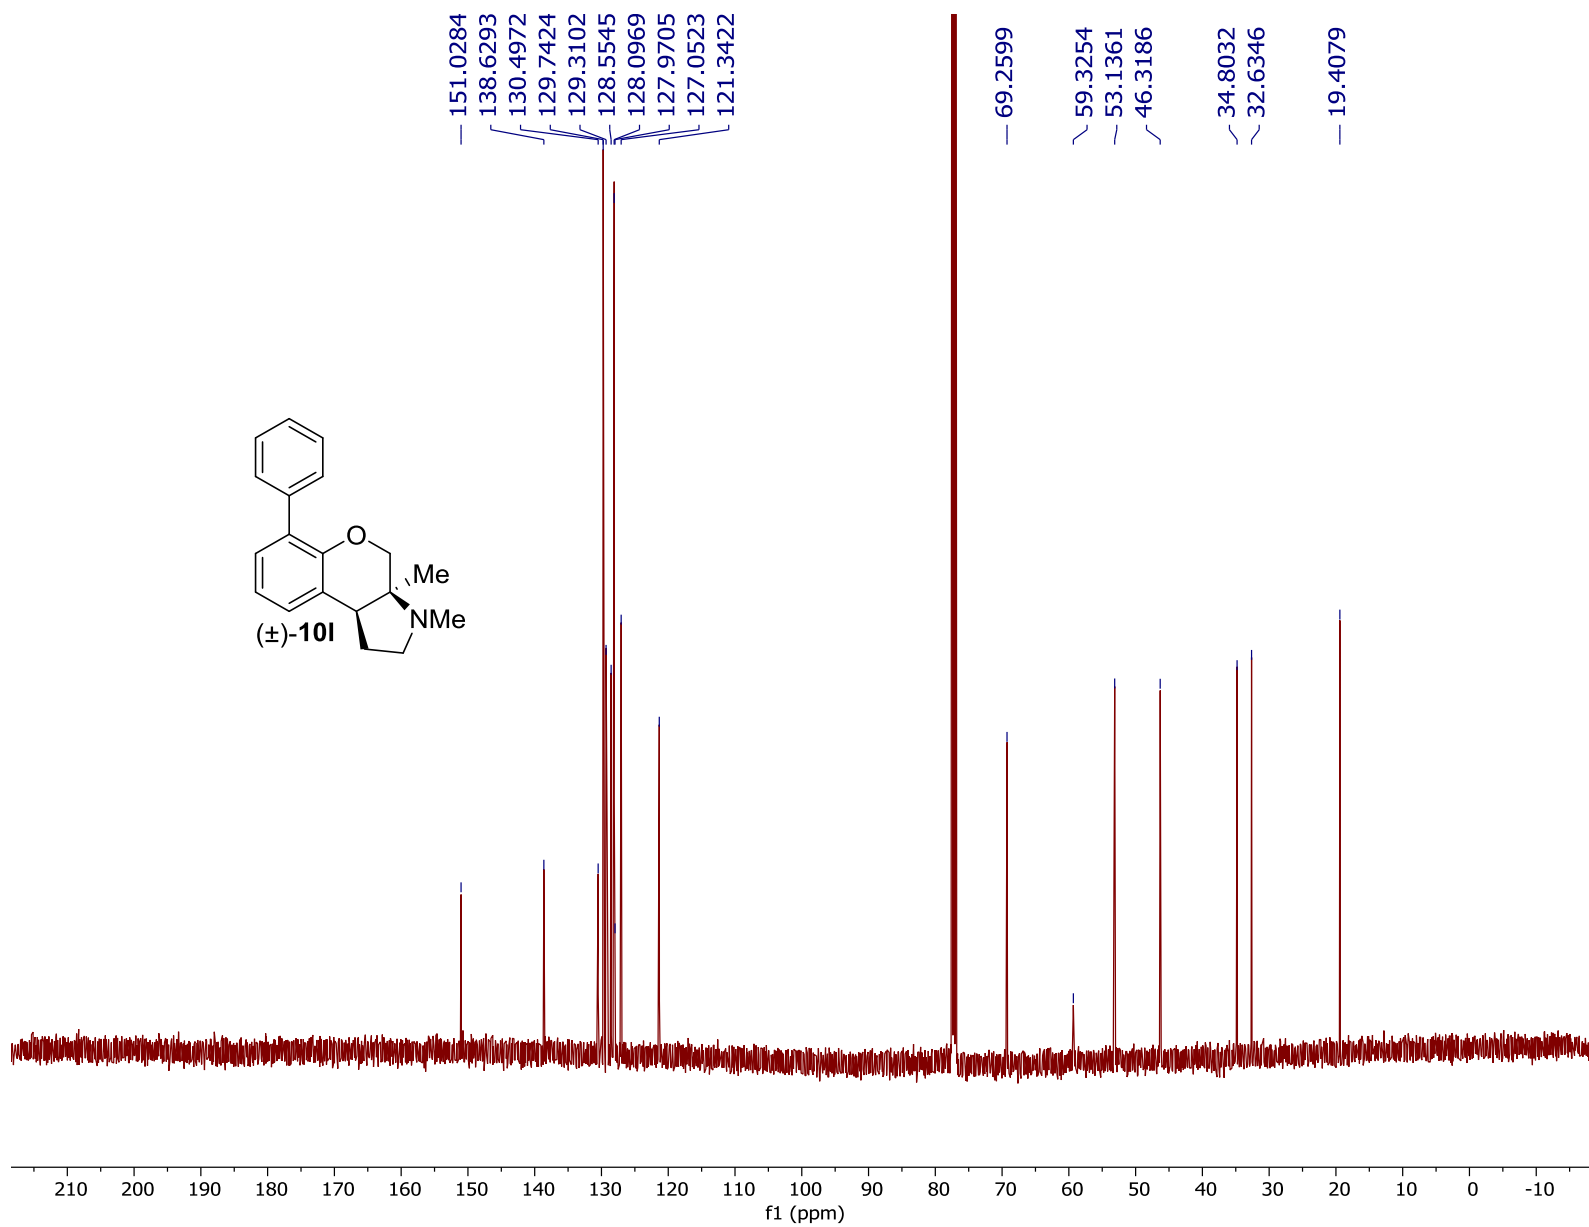

Compound 10I, 126 MHz  $^{13}\text{C}$  NMR Spectrum in  $\text{CDCl}_3$

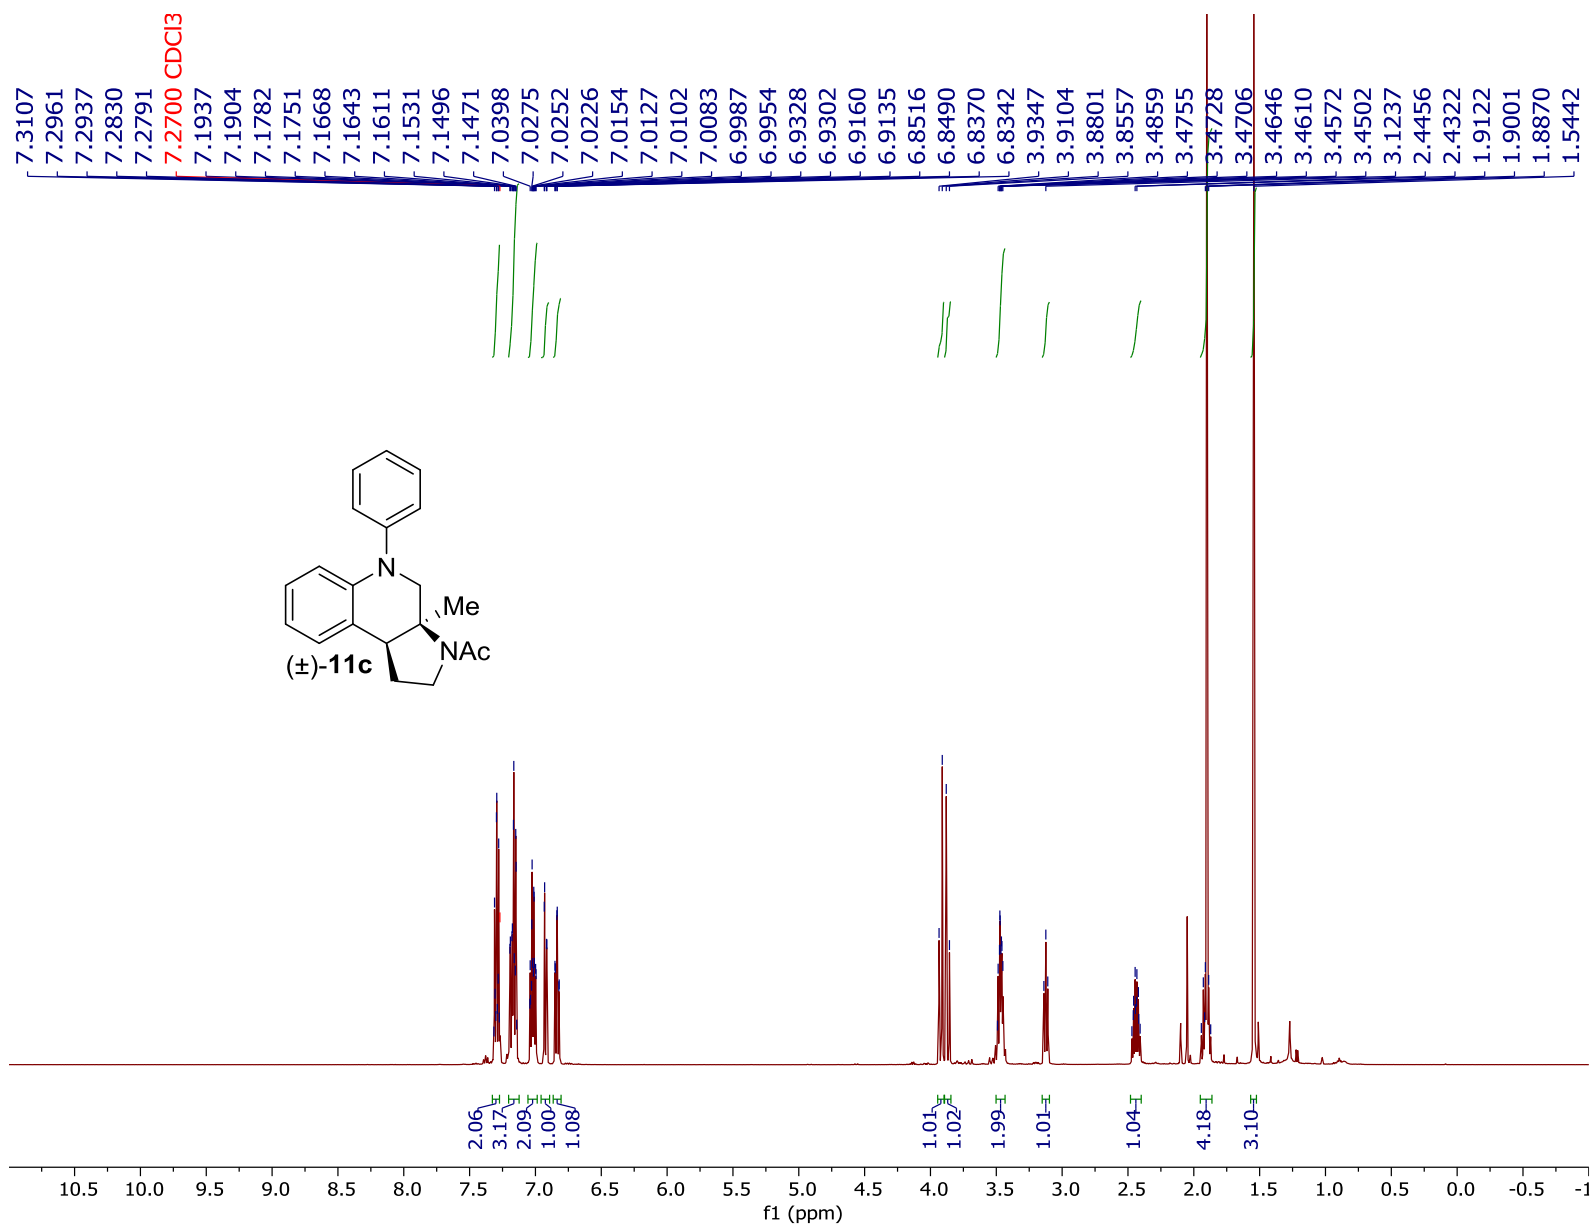

Compound 11c, 500 MHz <sup>1</sup>H NMR Spectrum in CDCl<sub>3</sub>

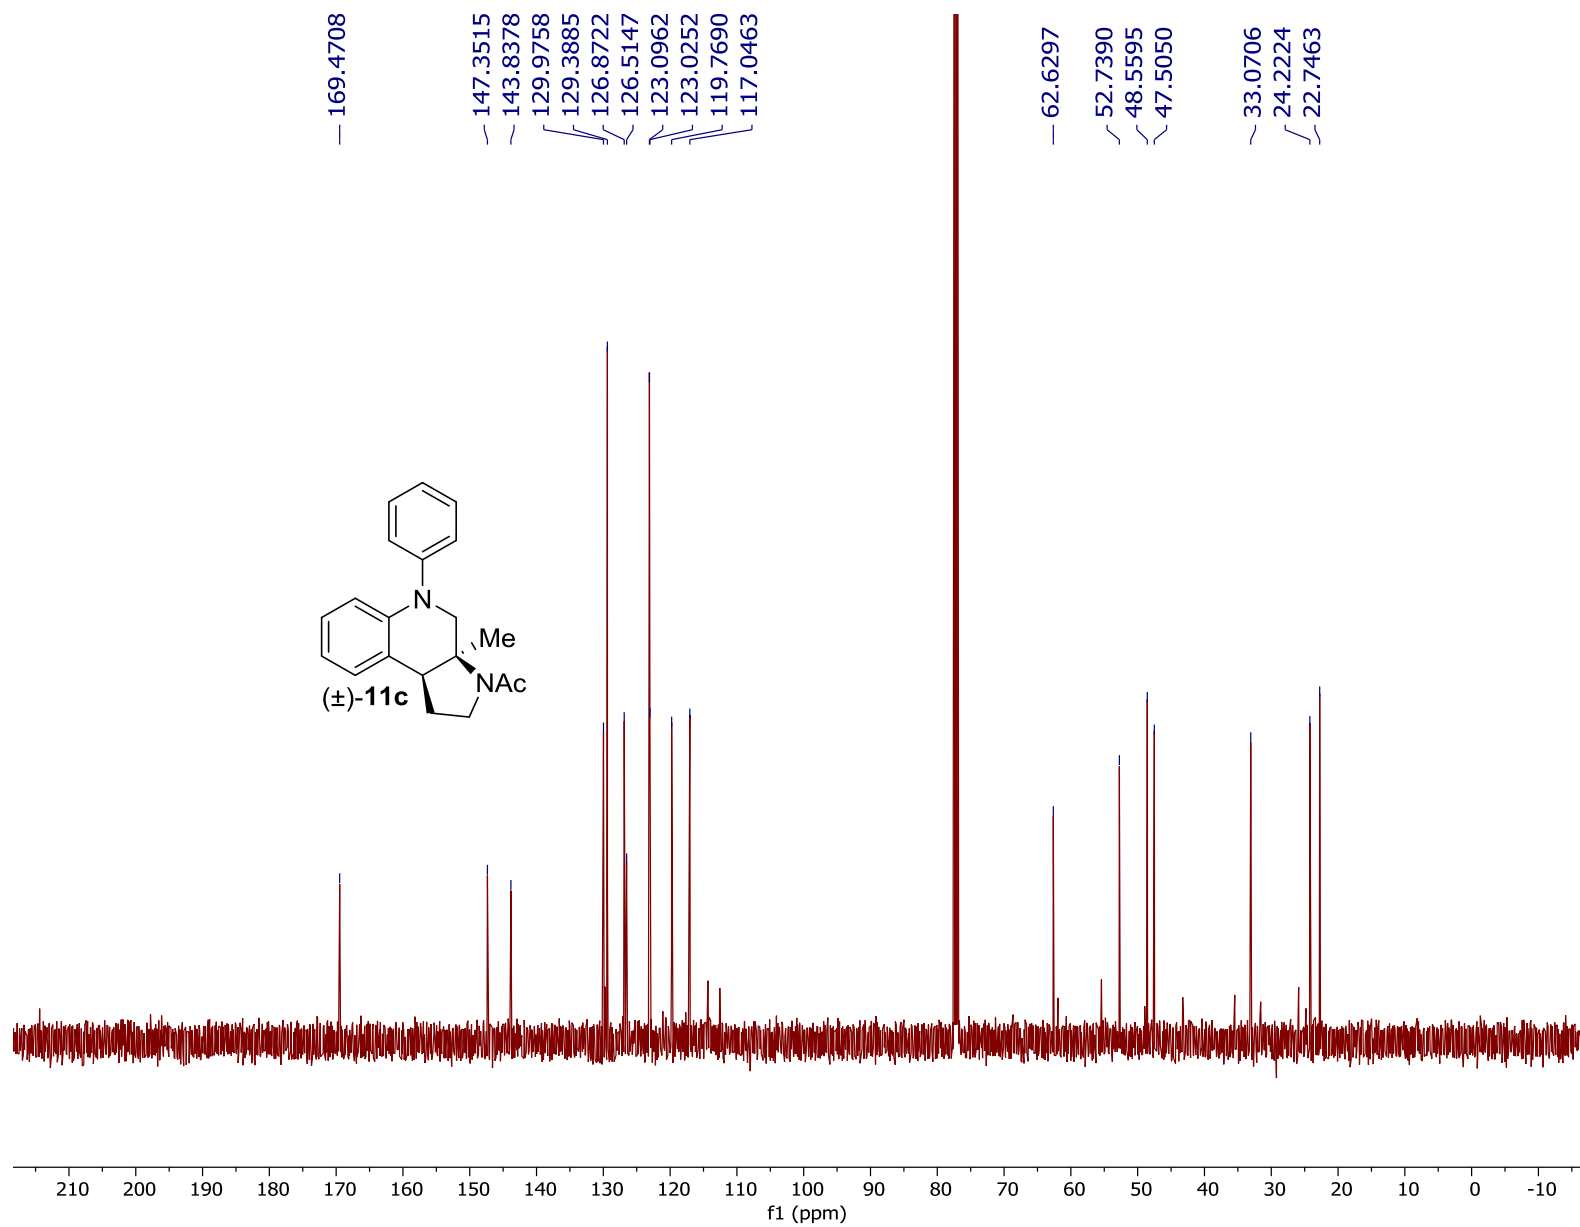

Compound 11c, 126 MHz <sup>13</sup>C NMR Spectrum in CDCl<sub>3</sub>

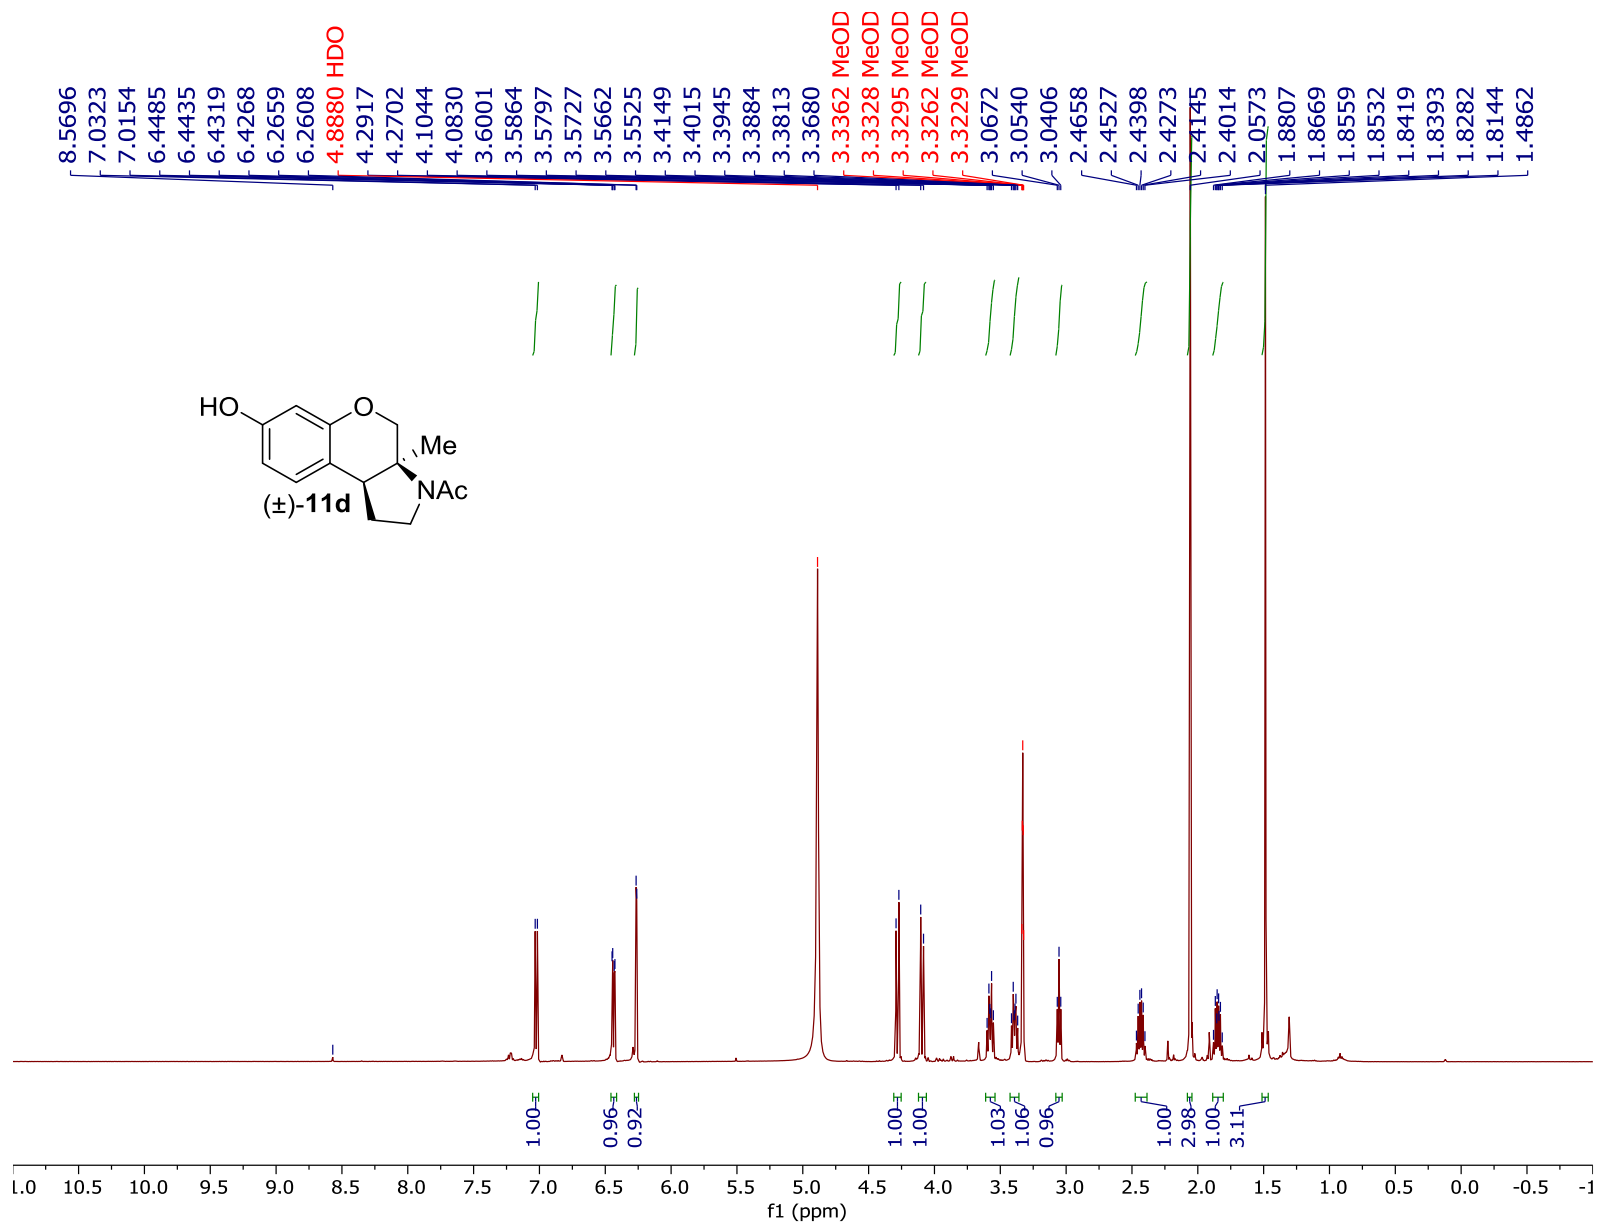

Compound 11d, 500 MHz <sup>1</sup>H NMR Spectrum in CD<sub>3</sub>OD

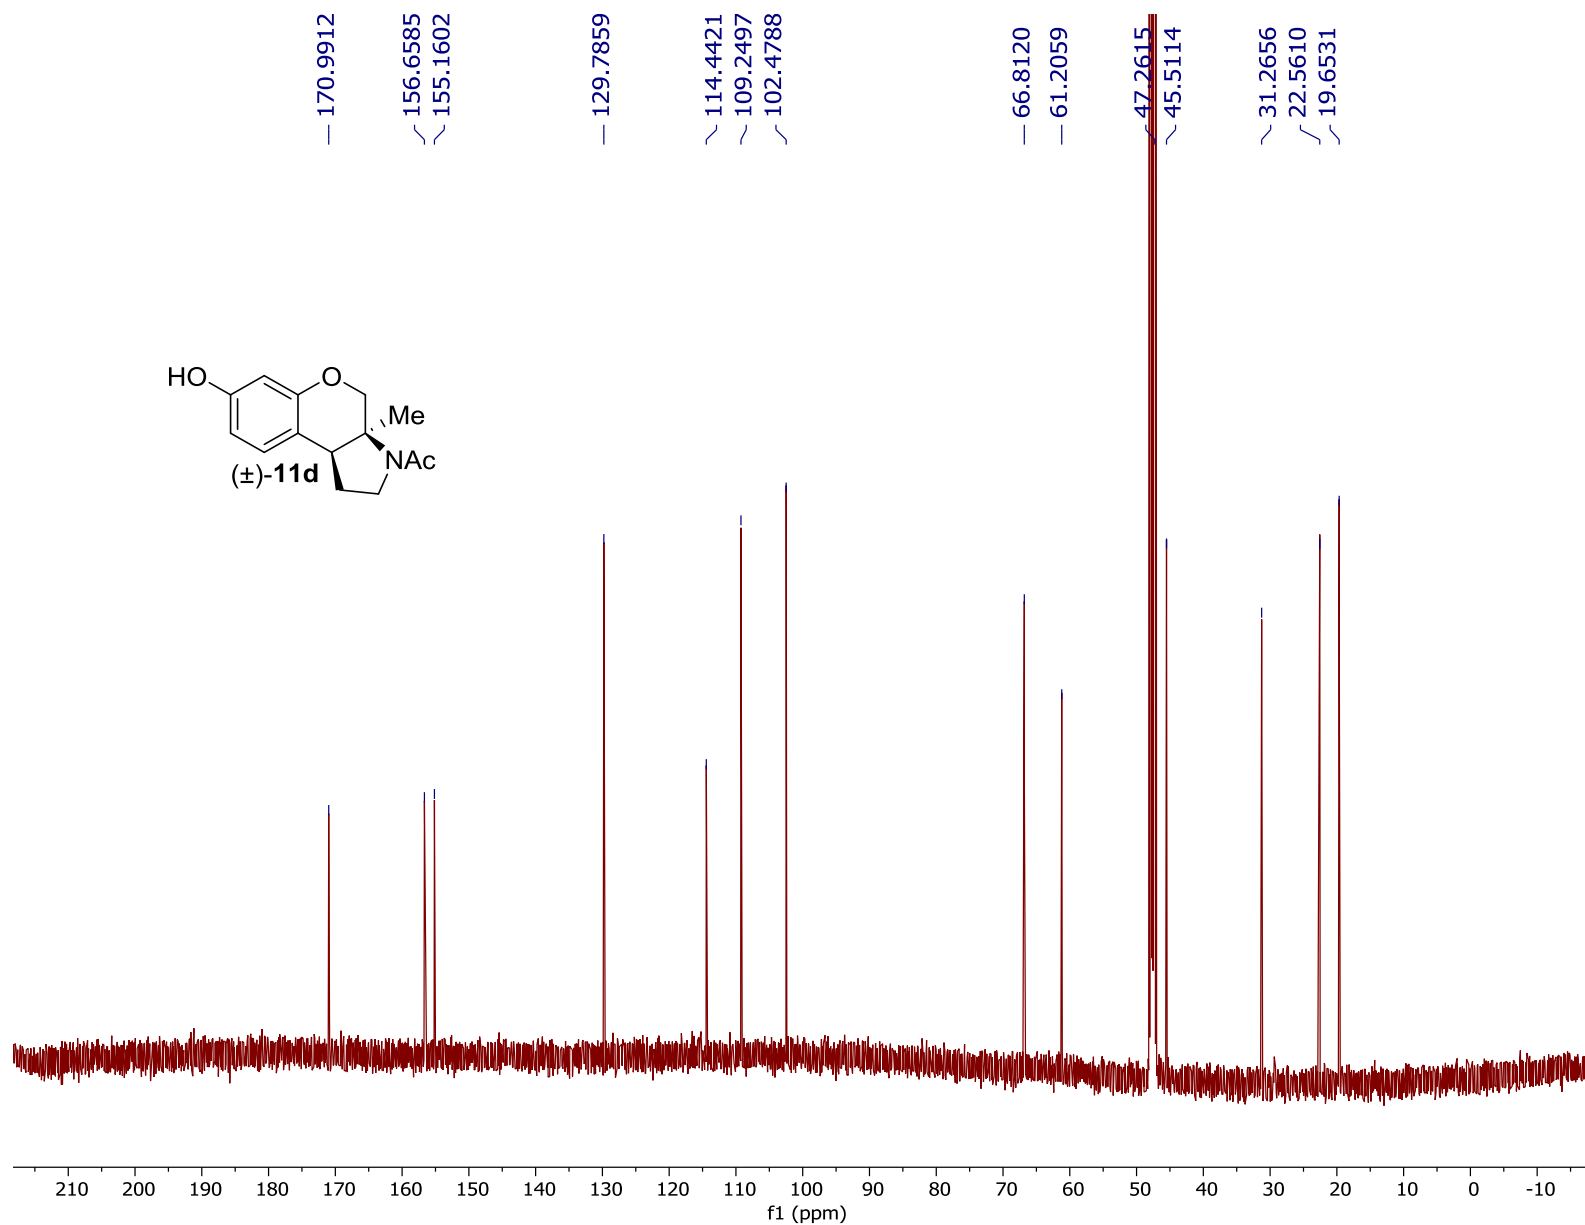

Compound 11d, 126 MHz <sup>13</sup>C NMR Spectrum in CD<sub>3</sub>OD

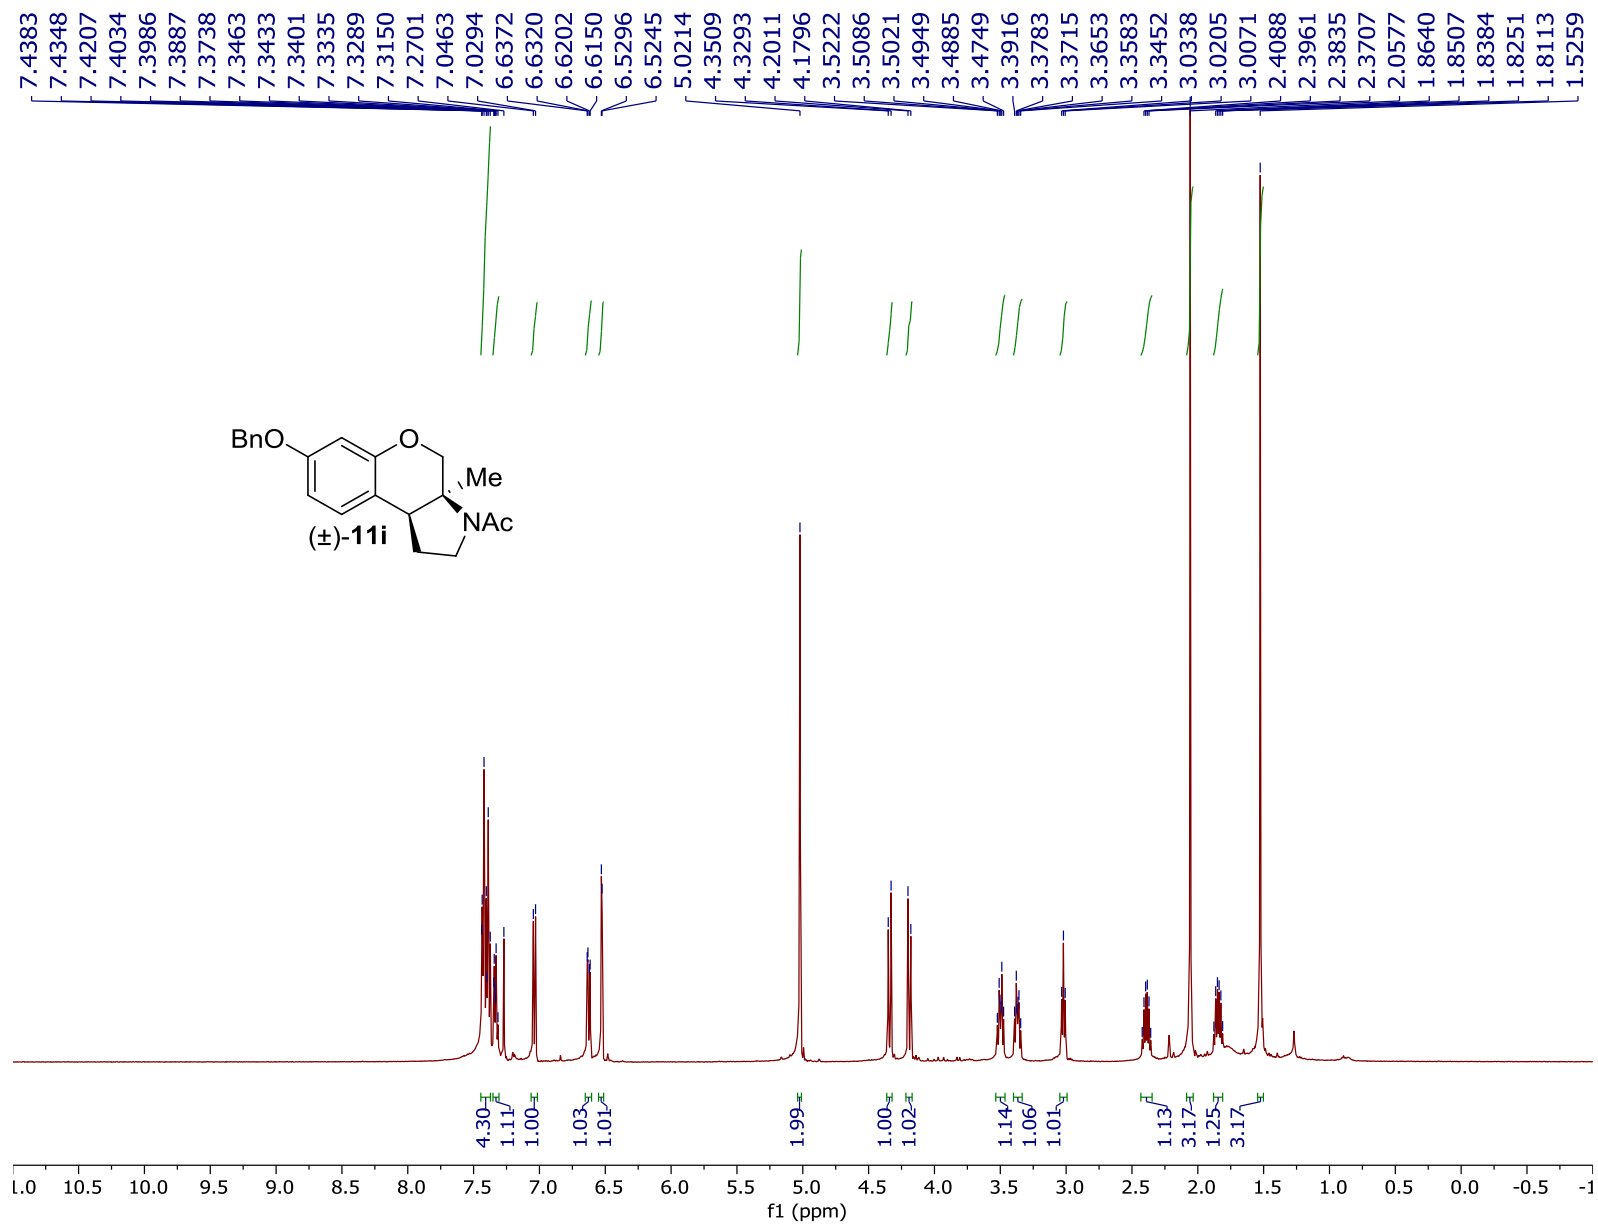



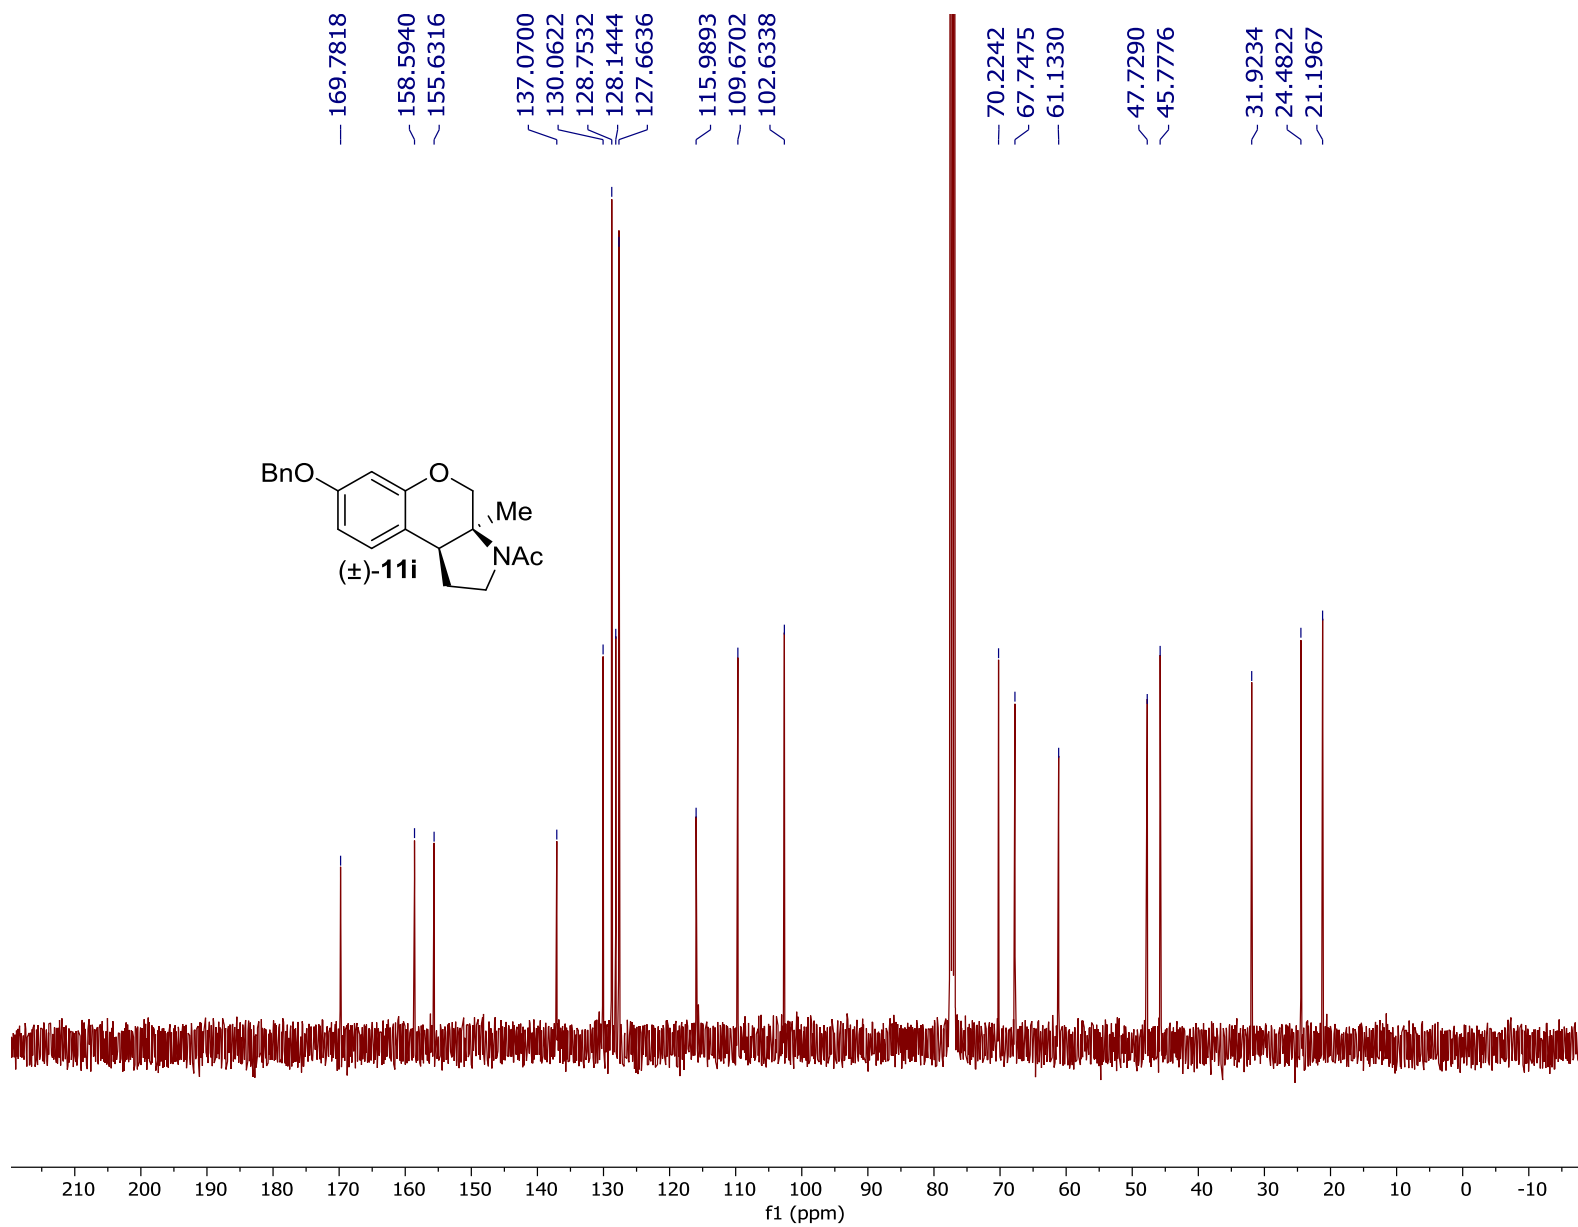

Compound 11i, 126 MHz  $^{13}\text{C}$  NMR Spectrum in  $\text{CDCl}_3$

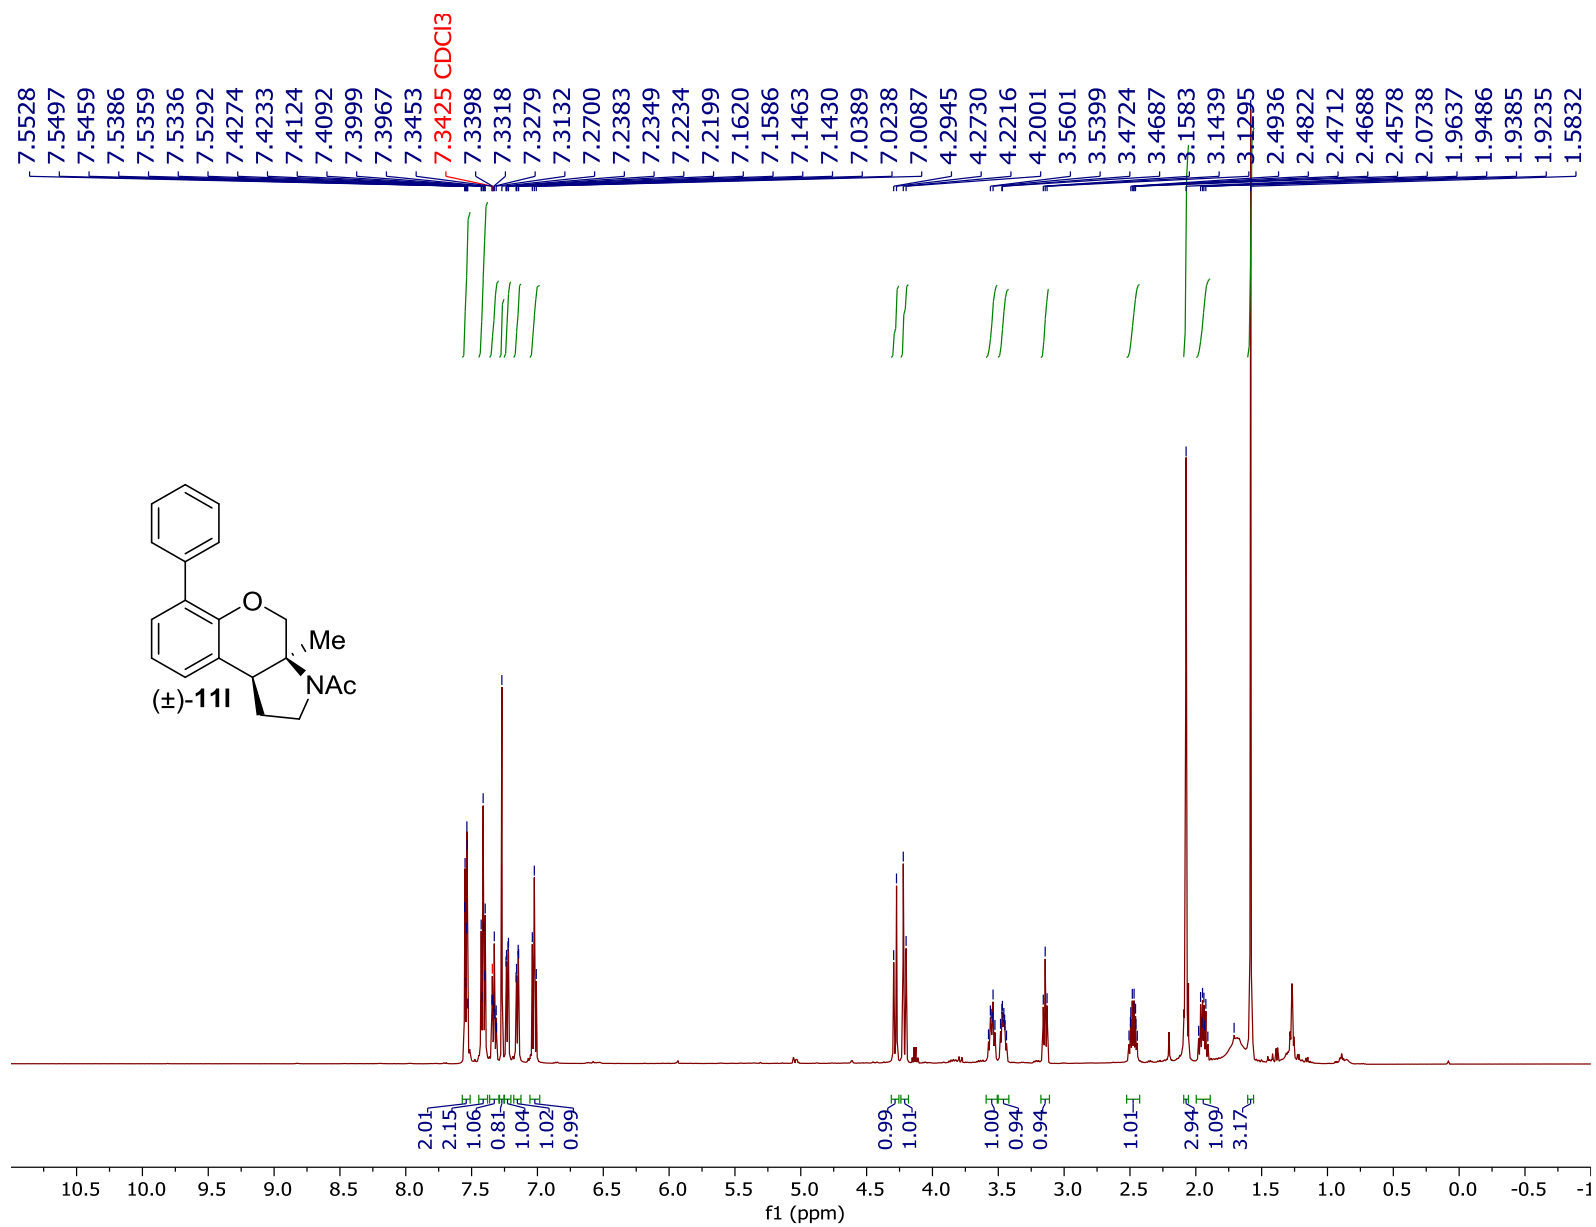

Compound 111, 500 MHz <sup>1</sup>H NMR Spectrum in CDCl<sub>3</sub>

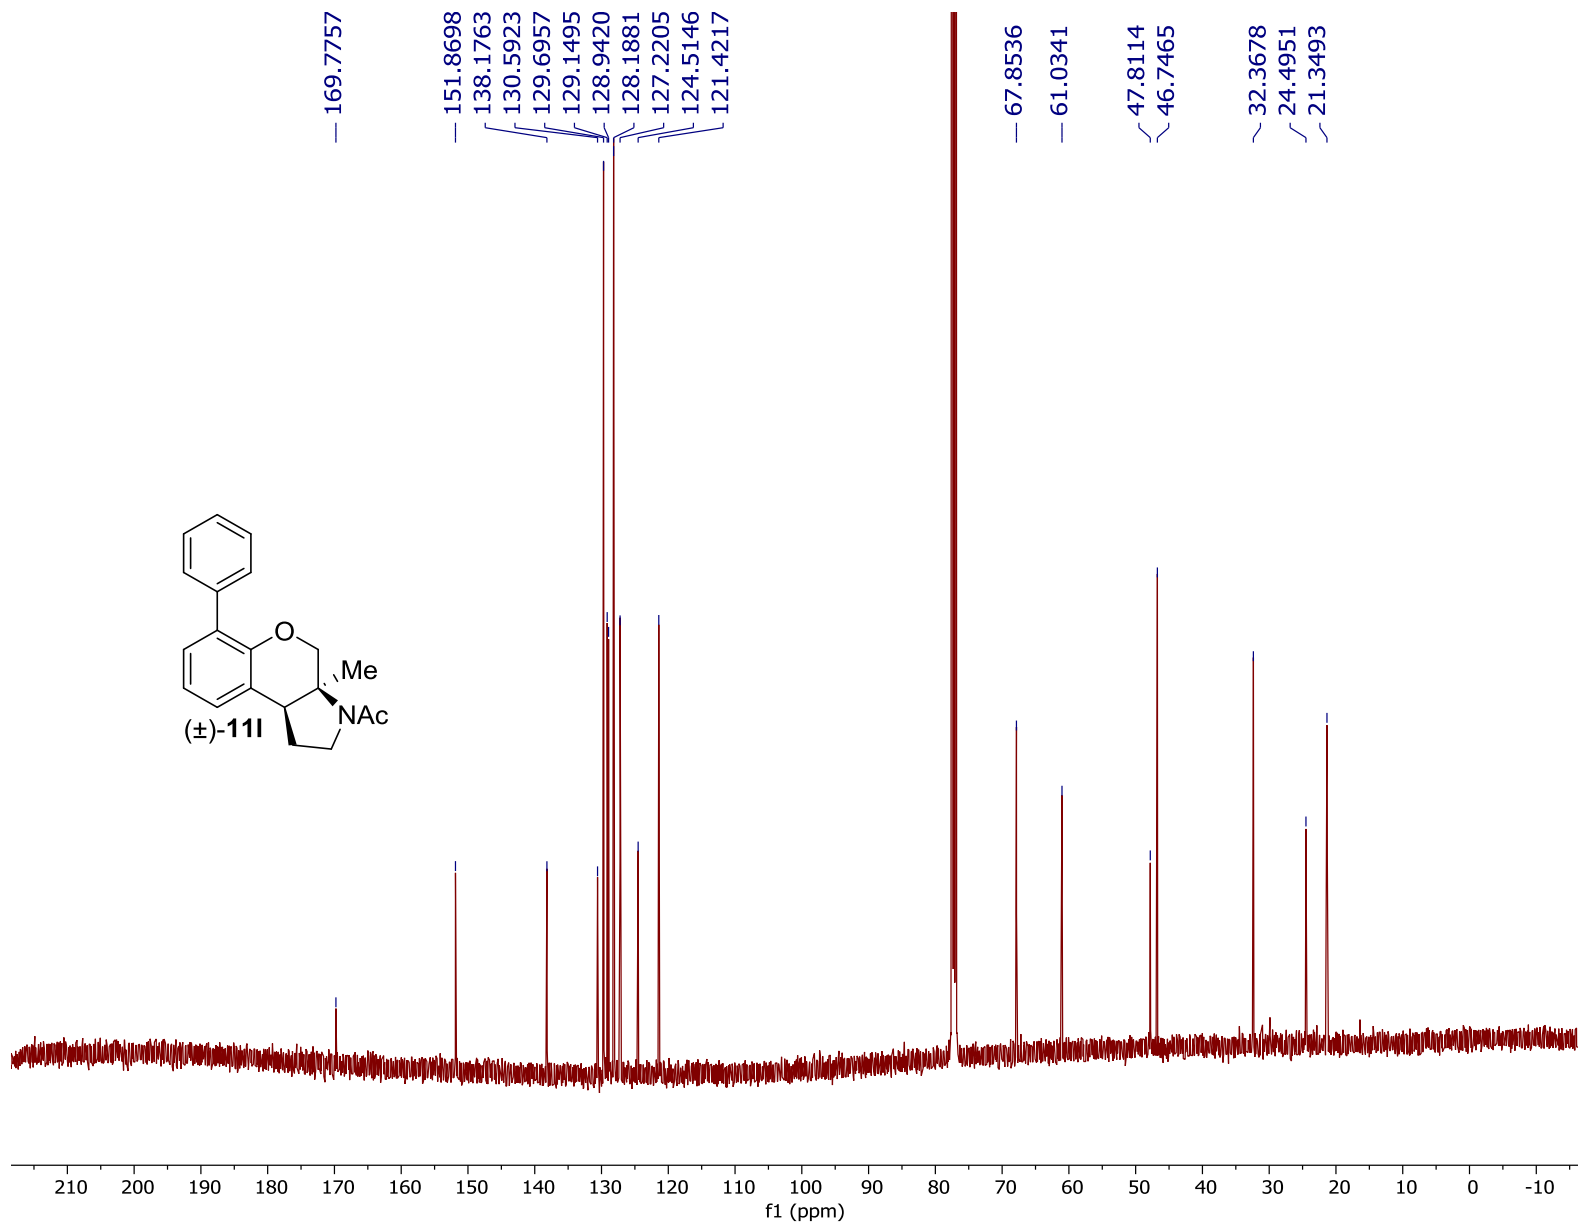

Compound 111, 101 MHz  $^{13}\text{C}$  NMR Spectrum in  $\text{CDCl}_3$
